1

2

3     **Dynamic ubiquitination determines transcriptional**  
4     **activity of the plant immune coactivator NPR1**

5

6     Michael J. Skelly<sup>1</sup>, James J. Furniss<sup>1</sup>, Heather L. Grey<sup>1</sup>, Ka-Wing Wong<sup>1</sup> and Steven  
7     H. Spoel<sup>1,\*</sup>

8

9     <sup>1</sup>Institute of Molecular Plant Sciences, School of Biological Sciences, University of  
10     Edinburgh, Edinburgh, EH9 3BF, UK

11     \*Correspondence: [steven.spoel@ed.ac.uk](mailto:steven.spoel@ed.ac.uk)

12

13

14

15

16

17

18

19

20

21

22     Dr. Steven H. Spoel (ORCID: [0000-0003-4340-7591](https://orcid.org/0000-0003-4340-7591))

23     Institute of Molecular Plant Sciences

24     School of Biological Sciences

25     University of Edinburgh

26     King's Buildings

27     Max Born Crescent

28     Edinburgh, EH9 3BF

29     United Kingdom

30

31     Email: [steven.spoel@ed.ac.uk](mailto:steven.spoel@ed.ac.uk)

32     Phone: +44 (0)131 650 7065

33 **ABSTRACT**

34 Activation of systemic acquired resistance in plants is associated with transcriptome  
35 reprogramming induced by the unstable coactivator NPR1. Immune-induced  
36 ubiquitination and proteasomal degradation of NPR1 are thought to facilitate  
37 continuous delivery of active NPR1 to target promoters, thereby maximising gene  
38 expression. Because of this potentially costly sacrificial process, we investigated if  
39 ubiquitination of NPR1 plays transcriptional roles prior to its proteasomal turnover.  
40 Here we show ubiquitination of NPR1 is a processive event in which initial modification  
41 by a Cullin-RING E3 ligase promotes its chromatin association and expression of target  
42 genes. Only when polyubiquitination of NPR1 is enhanced by the E4 ligase, UBE4, it  
43 is targeted for proteasomal degradation. Conversely, ubiquitin ligase activities are  
44 opposed by UBP6/7, two proteasome-associated deubiquitinases that enhance NPR1  
45 longevity. Thus, immune-induced transcriptome reprogramming requires sequential  
46 actions of E3 and E4 ligases balanced by opposing deubiquitinases that fine-tune  
47 activity of NPR1 without strict requirement for its sacrificial turnover.

48

49 **Keywords:** NPR1, salicylic acid, systemic acquired resistance, plant immunity,  
50 ubiquitin.

## 51 INTRODUCTION

52 Immune responses must be tightly controlled to provide appropriate, efficient  
53 and timely resistance to pathogenic threats. A major hallmark of eukaryotic immune  
54 responses is dramatic reprogramming of the transcriptome to prioritise defences over  
55 other cellular functions. In plants transcriptional reprogramming is largely orchestrated  
56 by the immune hormone salicylic acid (SA) that accumulates upon recognition of  
57 biotrophic pathogens. SA not only induces resistance in infected local tissues, it is also  
58 required for establishment of systemic acquired resistance (SAR), a form of induced  
59 resistance with broad-spectrum effectiveness that is long-lasting and protects the  
60 entire plant from future pathogen attack (Spoel and Dong, 2012). Establishment of  
61 SAR and associated transcriptome reprogramming are mediated by the transcriptional  
62 coactivator NPR1 (nonexpressor of pathogenesis-related (*PR*) genes 1). The majority  
63 of SA-induced genes are NPR1 dependent, indicating NPR1 is a master regulator of  
64 plant immunity (Wang et al., 2006). Consequently, loss of NPR1 function results in  
65 severely immune-compromised plants unable to activate SAR.

66 Since NPR1 exerts its activity in the nucleus (Kinkema et al., 2000), controlling  
67 its nuclear entry provides a means to prevent spurious activation of immune  
68 responses. Indeed, in resting cells NPR1 is sequestered in the cytoplasm as a large  
69 redox-sensitive oligomer that is formed by intermolecular disulphide linkages between  
70 conserved cysteine residues (Mou et al., 2003). NPR1 monomers that escape  
71 oligomerization and enter the nucleus are ubiquitinated by a Cullin-RING Ligase 3  
72 (CRL3), a modular E3 ubiquitin ligase, resulting in their degradation by the 26S  
73 proteasome (Spoel et al., 2009). Importantly, constitutive clearance of NPR1 from  
74 nuclei of resting cells by concerted action of CRL3 and the proteasome is necessary  
75 to prevent untimely activation of its target genes and associated autoimmunity.

76           Upon activation of SAR, NPR1 is subject to an array of post-translational  
77 modifications. A combination of alterations in redox-based modifications,  
78 phosphorylation and SUMOylation of NPR1 result in the formation of a transactivation  
79 complex that induces the transcription of immune-responsive target genes (Skelly et  
80 al., 2016; Withers and Dong, 2016). Subsequent to these post-translational control  
81 points, NPR1 becomes phosphorylated at Ser11 and Ser15, which surprisingly results  
82 in recruitment of CRL3 followed by its degradation (Spoel et al., 2009).  
83 Pharmacological inhibition of the proteasome, genetic mutation of CRL3, and mutation  
84 of Ser11/15 all stabilised NPR1 protein, yet impaired the expression of SA-induced  
85 NPR1 target genes (Spoel et al., 2009). These findings indicate that paradoxically,  
86 ubiquitination and degradation of NPR1 are required for the full expression of its target  
87 genes. We previously proposed a proteolysis-coupled transcription model in which  
88 activation of target gene transcription results in NPR1 being marked as 'spent' by  
89 Ser11/15 phosphorylation (Spoel et al., 2009). SUMOylation of NPR1 was required for  
90 Ser11/15 phosphorylation and facilitates its interaction with other transcriptional  
91 activators (Saleh et al., 2015), suggesting that NPR1 becomes inactivated only after it  
92 has initiated gene transcription. Removal of inactive NPR1 from target promoters may  
93 be necessary to allow binding of new active NPR1 protein that can reinitiate  
94 transcription, thereby correlating the rate of NPR1 turnover to the level of target gene  
95 expression (Spoel et al., 2009). This type of transcriptional control by unstable  
96 (co)activators has also been reported in other eukaryotes, including for key  
97 transcriptional regulators such as the nutrient sensor GCN4 in yeast and the estrogen  
98 receptor ER $\alpha$  as well as oncogenic cMyc and SRC-3 activators in humans (Kim et al.,  
99 2003; Lipford et al., 2005; Métiévier et al., 2003; Reid et al., 2003; von der Lehr et al.,  
100 2003; Wu et al., 2007). This suggests that the use of unstable transcriptional

101 (co)activators may be an evolutionary conserved mechanism for fine-tuning gene  
102 expression (Geng et al., 2012; Kodadek et al., 2006).

103 While transcription-coupled degradation of unstable (co)activators is an  
104 attractive model for controlling transcriptional outputs in eukaryotes, it is potentially  
105 also a costly sacrificial process. Therefore we explored the alternative possibility that  
106 prior to degradation, ubiquitination itself might act as a transcriptional signal. As chains  
107 of four or more ubiquitin molecules are thought to be necessary for recruitment of most  
108 substrates to the proteasome (Thrower et al., 2000), it is plausible that processive  
109 ubiquitination could provide a window of opportunity for NPR1 to activate its target  
110 genes. In this study we demonstrate that the transcriptional activity of NPR1 is  
111 controlled by several ubiquitin chain modifying enzymes. Both processive ubiquitin  
112 chain extension and trimming activities contribute to the regulation of NPR1 target  
113 genes and establishment of plant immunity. Our findings imply that in eukaryotes  
114 transcriptional outputs of unstable (co)activators may not be fine-tuned by their  
115 proteasomal turnover per se but rather by conjugated ubiquitin chains of dynamic  
116 variable length.

117

## 118 RESULTS

### 119 The E4 ligase UBE4 regulates SA- and NPR1-mediated plant immunity

120 To examine if processive ubiquitination of NPR1 plays a role in plant immune  
121 responses we examined a potential role for E4 ligases. Unlike E3 ligases, the E4 class  
122 do not contribute towards initial ubiquitination of substrates but rather extend pre-  
123 existing ubiquitin chains (Hoppe, 2005; Koegl et al., 1999). In Arabidopsis the E4 ligase  
124 UBE4/MUSE3 has been implicated in immune signalling (Huang et al., 2014). We  
125 investigated if UBE4 is involved in NPR1-dependent immune signalling by acquiring a  
126 loss-of-function T-DNA insertion mutant (Figure S1A). Like mutants in CRL3 ligase that  
127 fails to degrade NPR1 (Spoel et al., 2009), adult *ube4* plants displayed enhanced  
128 expression of immune genes in absence of pathogen challenge (Figure 1A). In  
129 agreement, adult *ube4* mutants showed autoimmunity against a high inoculum of *Psm*  
130 ES4326 (Figure 1B). To establish if these phenotypes were dependent on SA  
131 signalling, *ube4* mutant plants were crossed with SA-deficient *ics1* mutants  
132 (Wildermuth et al., 2001). The constitutive immune gene expression observed in *ube4*  
133 was abolished in *ube4 ics1* double mutant plants (Figure 1C). Furthermore, while wild-  
134 type (WT) and mutant *ube4* plants were completely immune to a low inoculum dosage  
135 of *Psm* ES4326, mutant *ics1* plants sustained bacterial proliferation. In agreement with  
136 the gene expression data, enhanced susceptibility was maintained in *ube4 ics1* double  
137 mutants (Figure 1D), indicating the autoimmune phenotype of adult *ube4* plants is  
138 completely dependent on SA. Because SA-dependent immunity is largely regulated by  
139 the transcription coactivator NPR1 (Cao et al., 1997), we crossed *ube4* with *npr1-1*  
140 mutant plants. Constitutive immune gene expression in *ube4* plants was completely  
141 abolished in *ube4 npr1* plants (Figure 1E) and this double mutant was equally  
142 susceptible to a low *Psm* ES4326 inoculum as *npr1* single mutants (Figure 1F).

143 Collectively, these data indicate that in unchallenged plants UBE4 suppresses the  
144 expression of SA-mediated NPR1 target genes and prevents autoimmunity.

145

#### 146 **UBE4 polyubiquitinates NPR1 coactivator and targets it for degradation**

147 Because *ube4* mutant phenotypes resemble those of mutants in CRL3 ligase (Spoel  
148 et al., 2009), we investigated if UBE4 also controls NPR1 stability in the nucleus.  
149 Expression of an YFP-UBE4 fusion protein in *Arabidopsis* protoplasts confirmed it is  
150 indeed partly localised to the nucleus (Figure S1B). We used the protein synthesis  
151 inhibitor cycloheximide to examine if UBE4 controls the stability of SA-induced NPR1.  
152 Both SA-induced constitutively expressed NPR1-GFP (in *npr1-1*) (Kinkema et al.,  
153 2000) and endogenous NPR1 from WT plants were degraded within a few hours after  
154 exposure to cycloheximide (Figure 2A and 2B). By contrast, both proteins were  
155 considerably more stable in the *ube4* mutant genetic background, indicating UBE4  
156 promotes NPR1 degradation. Recruitment of NPR1 to CRL3 for ubiquitination and  
157 subsequent degradation requires phosphorylation at residues Ser11 and Ser15 (Spoel  
158 et al., 2009). Therefore we examined if *ube4* mutants were impaired in NPR1 Ser11/15  
159 phosphorylation. However, Ser11/15 phosphorylation of NPR1-GFP was unaffected  
160 by the *ube4* mutation (Figure 2C), indicating UBE4 mediates NPR1 turnover  
161 downstream of CRL3-mediated ubiquitination.

162 We then investigated if UBE4 is involved in polyubiquitination of NPR1.  
163 Pulldown of polyubiquitinated proteins using tandem-repeated ubiquitin-binding  
164 entities (TUBE) (Hjerpe et al., 2009) followed by detection of NPR1-GFP, revealed that  
165 SA stimulated polyubiquitination of NPR1-GFP (Figure 2D). By contrast, SA-induced  
166 polyubiquitination of NPR1-GFP was compromised in *ube4* mutants (Figure 2D), but  
167 ubiquitinated NPR1 was still detected at high-molecular weight. Therefore we sought

168 to distinguish if in *ube4* mutants, NPR1 was modified by long ubiquitin chains or  
169 multiple shorter chains, both of which yield high-molecular weights on SDS-PAGE.  
170 Thus, we performed pull down experiments with recombinant S5a ubiquitin interacting  
171 motifs (S5aUIM) that preferentially bind chains of four or more ubiquitin molecules  
172 (Deveraux et al., 1994; Young et al., 1998). Compared to plants carrying wild-type  
173 *UBE4* alleles, the amount of SA-induced polyubiquitinated NPR1-GFP pulled down  
174 with recombinant S5aUIM was strikingly lower in *ube4* mutants (Figure 2E), indicating  
175 that UBE4 promotes formation of long ubiquitin chains on NPR1 leading to its  
176 proteasomal degradation.

177

### 178 **Processive ubiquitination controls transcriptional activity of NPR1**

179 Because UBE4 enhanced polyubiquitination of NPR1 and controlled its stability (Figure  
180 2), we investigated if similar to CRL3 (Spoel et al., 2009), it also promotes  
181 transcriptional activity of NPR1. In stark contrast to *cul3a cul3b* mutants that were  
182 compromised in SA-induced expression of NPR1 target genes, *ube4* mutants exhibited  
183 elevated expression levels that were much higher than in WT (Figure 3A, 3B). To  
184 explore the effect of UBE4 on the NPR1-dependent transcriptome, we performed RNA  
185 Seq on SA-treated WT, *ube4* and *npr1* plants. Among 2612 genes whose expression  
186 changed by  $\geq 2$ -fold in response to SA in WT or *ube4* mutants, 75% were stringently  
187 dependent on NPR1 (*i.e.*  $\geq 1.5$ -fold difference compared to *npr1*) (Table S1). We  
188 separated these genes into two categories: (1) genes that were regulated by SA in  
189 both WT and mutant *ube4* plants, and (2) genes that did not make the  $\geq 2$ -fold change  
190 cut-off in WT but were highly regulated by SA in *ube4* mutants. The majority of SA-  
191 induced genes in category 1, including *PR1* and *WRKY* marker genes, received a  
192 boost in expression when *UBE4* was knocked out (Figure 3C). This positive effect was



193 even clearer for category 2 genes (Figure 3C, 3D). Similarly, genes suppressed by SA  
194 treatment displayed further downregulation in *ube4* mutants compared to WT (Figure  
195 3C). By contrast, SA-regulated genes that were not dependent on NPR1 behaved  
196 similarly in WT and mutant *ube4* plants (Figure S2A), suggesting UBE4 exerts its  
197 effects predominantly through NPR1. Together these data suggest that in absence of  
198 UBE4-mediated long-chain polyubiquitination, NPR1 remains in a highly active  
199 transcriptional state.

200 To understand the opposing effects of CRL3 and UBE4 on transcriptional  
201 activity of NPR1, we examined endogenous NPR1 protein levels. Compared to WT  
202 plants, SA-induced NPR1 accumulated to elevated levels in both *cul3a/b* and *ube4*  
203 mutants (Figure 3E). Thus, NPR1 protein levels cannot explain differences in  
204 transcriptional output of NPR1. We then examined if changes in polyubiquitin chain  
205 length regulate NPR1 association with its target promoters. To that end we performed  
206 chromatin immunoprecipitation experiments on plants that constitutively expressed  
207 NPR1-GFP, thereby eliminating genotype-dependent differences in NPR1 protein  
208 level. Coinciding with elevated *PR1* gene expression, at 8h after SA treatment more  
209 NPR1-GFP was bound to the *PR1* promoter in *ube4* mutants compared to plants  
210 carrying wild-type *UBE4* alleles (Figure 3F). This indicates that in absence of long  
211 polyubiquitin chains, early occupancy by transcriptionally competent NPR1 is  
212 increased at target promoters. We also examined a later time point after SA treatment  
213 (24h) and found that NPR1-GFP was still associated with the *PR1* promoter in plants  
214 expressing wild-type *UBE4*, but not in *ube4* mutants (Figure 3G). Nonetheless, *PR1*  
215 gene expression remained at elevated levels in these mutants (Figure 3G), implying  
216 that in absence of long-chain polyubiquitination NPR1 strongly switches on target  
217 genes without the need for long-term residency at their promoters.

218 To investigate if CRL3 and UBE4 act independently or in tandem, we crossed  
219 *ube4* single with *cul3a cul3b* double mutants and analysed the expression of NPR1  
220 target genes in the resulting triple mutant. Strikingly, *cul3a cul3b ube4* mutants showed  
221 severe developmental defects, including stunted growth and complete sterility (Figure  
222 S2B, S2C). Very few viable homozygous plants were recovered, perhaps suggesting  
223 these two ligases work together and share substrates. Nonetheless we were able to  
224 select just enough plants to examine the behaviour of NPR1 target genes. In *cul3a*  
225 *cul3b ube4* mutants the SA-induced expression of several genes, including *PR* genes,  
226 was impaired to a similar extent as in *cul3a cul3b* double mutants, indicating that  
227 elevated gene expression observed in *ube4* plants is dependent on CRL3 (Figure 3H,  
228 3I). However, a subset of NPR1 target genes (*i.e.* *WRKY18*, *WRKY38*, *WRKY62*) were  
229 dramatically upregulated in *cul3a cul3b ube4* mutants to a level higher than in any of  
230 the other genotypes. This suggests that in absence of CRL3 and UBE4, these genes  
231 were activated through another pathway or were highly responsive to elevated  
232 homeostatic levels of NPR1 protein and may therefore not be suitable readouts for this  
233 particular epistatic analysis (Figure 3I). Regardless of this specific, our broader findings  
234 suggest that CRL3 and UBE4 function sequentially in the processive addition or  
235 extension of ubiquitin chains on NPR1 but with opposing effects on its transcriptional  
236 activity.

237 We then examined if in *ube4* mutants NPR1 was trapped in a highly  
238 transcriptional active state that does not require proteasome-mediated turnover. To  
239 negate any feedback effects of loss of UBE4 activity on endogenous NPR1 expression,  
240 seedlings constitutively expressing NPR1-GFP were treated with SA plus a range of  
241 MG132 concentrations. SA-induced *PR1* and *WRKY* gene expression was inhibited  
242 by increasing concentrations of MG132 in *NPR1-GFP* (in *npr1*) plants (Figure 3J and

243 S2D). By contrast, the SA-induced expression of these NPR1 target genes was largely  
244 unresponsive to MG132 in *ube4* mutants, especially at lower concentrations. Thus,  
245 loss of UBE4 largely uncoupled NPR1 target gene expression from proteasome  
246 activity, demonstrating the importance of processive ubiquitination for NPR1 activity.  
247 In summary, our findings indicate that initial CRL3-mediated ubiquitination is required  
248 for NPR1 to attain its full transcriptional activity, while processive long ubiquitin chain  
249 formation mediated by UBE4 inactivates NPR1 and promotes its degradation by the  
250 proteasome.

251

## 252 **Deubiquitinases regulate NPR1-dependent transcription**

253 Trimming or removal of ubiquitin chains is performed by deubiquitinases (DUBs) and  
254 may provide another layer of regulation of NPR1 activity. The *Arabidopsis* genome is  
255 predicted to encode for at least 65 DUBs (Vierstra, 2009; Yang et al., 2007) with high  
256 likelihood of redundancy among gene families. Therefore identifying candidate genes  
257 that potentially regulate NPR1 by genetically screening mutant collections was not  
258 feasible. Instead, we used a range of pharmacological broad-spectrum and selective  
259 DUB inhibitors and assessed their effect on SA-induced gene expression. The broad-  
260 spectrum inhibitors PR-619 (Altun et al., 2011) and NSC632839 (Aleo et al., 2006)  
261 strongly impaired SA-induced gene expression across all NPR1 target genes tested  
262 (Figure 4A), suggesting that DUB activity is required for their optimal expression.  
263 Furthermore, while treatment with PR-619 or NSC632839 did not affect SA-induced  
264 transcription of the *NPR1* gene, it depleted NPR1 protein levels (Figure 4B). Thus,  
265 DUB activity may not only be required for NPR1-dependent gene expression but also  
266 for increasing NPR1 stability.

267           Next we tested more selective inhibitors that more specifically target one or a  
268 few DUBs. First we treated WT seedlings with various DUB inhibitors and compared  
269 the cellular levels of global ubiquitin conjugates with control-, and MG132-treated  
270 seedlings. While NSC632839 and MG132 treatments dramatically enhanced  
271 accumulation of ubiquitin conjugates, especially in combination with SA treatment, all  
272 other inhibitors had little effect on cellular ubiquitination levels (Figure 4C). We then  
273 examined the effect of these DUB inhibitors on SA-induced gene expression. All  
274 inhibitors strongly suppressed SA-induced expression of NPR1 target genes (Figure  
275 4D). Furthermore, most inhibitors were effective at low micromolar concentrations and  
276 suppressed NPR1 target genes in a dose-dependent manner (Figure S3). Collectively  
277 these data provide a first indication that DUB activity may be crucial for NPR1 stability  
278 and efficient activation of SA-induced NPR1 target genes.

279

### 280 **Identification of DUBs that regulate NPR1-dependent transcription**

281 The more selective inhibitors used in experiments described above have been shown  
282 to target DUBs in mammalian cells (Figure S4A) (Altun et al., 2011; Kapuria et al.,  
283 2010; Liu et al., 2003). To find potential homologues we used the sequences of these  
284 mammalian DUBs to search the *Arabidopsis* genome using BLASTp. The identified  
285 *Arabidopsis* DUBs included members of the *ubiquitin-specific protease (UBP)* and  
286 *ubiquitin C-terminal hydrolase (UCH)* multi-gene families (Figure S4A). We then  
287 searched mutant collections to identify T-DNA knockouts for each of these DUBs.  
288 *UBP14* knockouts are lethal in *Arabidopsis* (Doelling et al., 2001), while no T-DNA  
289 insertions were identified for either *UCH1* or *UCH2* in mutant collections of the Col-0  
290 genetic background. Therefore we did not pursue these DUBs further. The DUB  
291 inhibitor TCID is thought to target mammalian UCH-L3 for which we identified a single

292 *Arabidopsis* homologue, UCH3. We acquired a T-DNA insertion line that displayed  
293 complete knockout of *UCH3* expression (Figure S4B) and analysed SA-induced NPR1  
294 target gene expression. Figure 5A shows that SA-induced *PR1* and *WRKY* gene  
295 expression was comparable between *uch3* and WT plants, indicating UCH3 is unlikely  
296 to play a major role. Next we identified UBP12 and UBP13 as potential plant targets of  
297 both WP1130 and P22077 inhibitors (Figure S4A). Previous research has suggested  
298 a role for these two proteins in plant immunity, as *ubp12 ubp13* double knockdown  
299 RNAi plants exhibited elevated expression of *PR1* and increased resistance to the  
300 virulent pathogen *P. syringae* pv. *tomato* (Ewan et al., 2011). Single knockout mutants  
301 of *UBP12* and *UBP13* have no observable phenotype and double knockouts are  
302 seedling lethal (Cui et al., 2013; Ewan et al., 2011). However we acquired the *ubp12-*  
303 *2w* allele, previously described as a weak *ubp12 ubp13* double mutant (Cui et al.,  
304 2013), and analysed this mutant for SA-induced gene expression. Similar to a previous  
305 report (Ewan et al., 2011), we observed elevated *PR1* expression in *ubp12-2w* plants  
306 but other NPR1 target genes were activated to a similar extent as in WT (Figure 5B).  
307 This phenotype does not explain the suppressive effects we observed with  
308 pharmacological DUB inhibitors. Finally, we acquired T-DNA knockout lines for the  
309 mammalian USP14 homologues, UBP6 and UPB7 that are potentially targeted by the  
310 WP1130 inhibitor (Figure S4A, S4C). SA-induced expression of *PR1* was slightly lower  
311 in these mutants but *WRKY* gene expression was largely comparable to WT plants  
312 (Figure 5C). Since UBP6 and UBP7 are close homologues (Figure S5A, S5B), we  
313 generated *ubp6 ubp7* double knockout mutants (Figure S4C) that were viable and  
314 showed no observable developmental phenotypes. However, *ubp6 ubp7* mutants were  
315 impaired in activation of SA-induced gene expression (Figure 5D). This indicates that

316 UBP6 and UBP7 are functionally redundant and required for NPR1 target gene  
317 expression.

318

### 319 **UBP6 is a proteasome-associated DUB that deubiquitinates NPR1**

320 Human USP14 and its yeast homologue Ubp6 have both been shown to associate with  
321 the 26S proteasome, which is necessary for their activity (Borodovsky et al., 2001;  
322 Leggett et al., 2002). We tested if this is also the case for *Arabidopsis* UBP6 by  
323 constitutively expressing FLAG-tagged UBP6 in the *ubp6 ubp7* double mutant  
324 background followed by co-immunoprecipitation experiments. The proteasomal  
325 subunits S5a and RPN6 both co-immunoprecipitated with FLAG-tagged UBP6 (Figure  
326 6A), indicating UBP6 is also a proteasome-associated DUB in plants.

327         Next we examined if UBP6 exhibits typical DUB activity. We produced  
328 recombinant T7-tagged UBP6 and incubated it with HA-tagged ubiquitin vinyl sulfone  
329 (HA-UbVS), an ubiquitin mimic that cannot be hydrolysed upon irreversible binding to  
330 DUB active sites (Borodovsky et al., 2001). HA-UbVS readily labelled T7-UBP6 but  
331 only upon addition of 26S proteasomes (Figure 6B), indicating UBP6 has proteasome-  
332 activated DUB activity. Moreover, addition of WP1130 inhibitor completely blocked HA-  
333 UbVS labelling (Figure 6B), illustrating the effectiveness of this inhibitor on *Arabidopsis*  
334 UBP6.

335         To examine if UBP6 can cleave ubiquitin chains we incubated recombinant  
336 UBP6 with free ubiquitin chains or with di-ubiquitin of different linkage types and  
337 compared it to activity of recombinant human USP14. Similar to human USP14,  
338 *Arabidopsis* UBP6 displayed very little deubiquitination activity on free ubiquitin chains  
339 or di-ubiquitin of K48 and K63 linkage types (Figures S5C-S5E). Only wild-type UBP6  
340 but not UBP6(C113S) in which the catalytic cysteine residue was mutated, was weakly

341 capable of trimming K63-linked chains in presence of 26S proteasomes, although this  
342 activity required very long incubation times (Figure S5D). These findings mirror the  
343 poor *in vitro* activity of human USP14 on free ubiquitin chains (Lee et al., 2016).  
344 Instead, human USP14 deubiquitinates anchored ubiquitin chains of various linkage  
345 types, including K48 linkages that target proteins for proteasome-mediated  
346 degradation (Lee et al., 2016). Therefore we proceeded to investigate if UBP6 activity  
347 cleaves ubiquitin chains anchored to NPR1. Indeed, incubation of purified  
348 polyubiquitinated NPR1-GFP with recombinant UBP6 and 26S proteasomes led to the  
349 release of ubiquitin conjugates of approximately hexa-ubiquitin chain length (Figure  
350 6C). These results demonstrate that UBP6 is an active DUB capable of removing  
351 ubiquitin chains en bloc from NPR1.

352

### 353 **Deubiquitination by UBP6 and UBP7 regulates NPR1 stability and transcriptional** 354 **activity**

355 So what is the effect of UBP6- and UBP7-mediated deubiquitination on NPR1 function?  
356 We found that treatment of *NPR1-GFP* (in *npr1*) seedlings with WP1130 inhibitor  
357 increased the levels of SA-induced polyubiquitinated NPR1-GFP while reducing the  
358 total amount of this protein (Figure 6D). This suggests that UBP6 and UBP7 activities  
359 are required for deubiquitination of SA-induced NPR1-GFP, thereby rescuing it from  
360 degradation. To further examine this possibility, we analysed the stability of  
361 endogenous NPR1 protein in SA-treated *ubp6 ubp7* double mutants. CHX chase  
362 experiments revealed that compared to WT plants, NPR1 was destabilised in *ubp6*  
363 *ubp7* mutants (Figure 6E). These results demonstrate that UBP6 and UBP7 serve to  
364 stabilise NPR1 by removing ubiquitin chains that signal for its proteasome-mediated  
365 degradation.



366           Given the importance of processive ubiquitination for the transcriptional activity  
367 of NPR1, we explored how UBP6- and UBP7-mediated deubiquitination might affect  
368 NPR1 coactivator function. Because UBP6 and UBP7 were required for NPR1-  
369 dependent *PR1* gene expression (Figure 5D), we questioned if NPR1 was still  
370 associated with the *PR1* promoter in absence of UBP6 and UBP7 activities.  
371 Surprisingly, ChIP experiments showed that SA-induced association of NPR1-GFP  
372 with the *PR1* promoter was strongly enhanced in presence of WP1130 inhibitor (Figure  
373 6F). This suggests that UBP6 and UBP7 prevent the build-up of long polyubiquitin  
374 chains that block the transcriptional activity of NPR1. It also implies that similar to their  
375 yeast homologue, UBP6 and UBP7 exhibit proteasome inhibitory activity (Hanna et al.,  
376 2006). This activity is thought to delay degradation of proteasome substrates, thereby  
377 creating a window of opportunity for DUBs to deubiquitinate substrates and pardon  
378 them from proteolysis. Importantly, proteasome inhibitory activity does not require the  
379 catalytic active site (Hanna et al., 2006). Thus, to investigate how deubiquitination and  
380 proteasome inhibitory activities of UBP6 contribute to the regulation of NPR1  
381 coactivator activity, we expressed FLAG-tagged wild-type UBP6 (FLAG-UBP6) and  
382 catalytically inactive UBP6(C113S) (FLAG-UBP6m) in *ubp6 ubp7* double mutants.  
383 While *ubp6 ubp7* mutants were compromised in SA-induced activation of all NPR1  
384 target genes tested, expression of FLAG-UBP6 fully restored SA-responsiveness  
385 (Figure 6G). By contrast, FLAG-UBP6m restored SA-induced expression of only a  
386 subset, but not all NPR1 target genes. A distinction was observed between *WRKY* and  
387 *PR* genes, with the former requiring catalytic DUB activity of UBP6 while the latter did  
388 not (Figure 6G). These data indicate that catalytic and non-catalytic activities of UBP6  
389 regulate distinct NPR1-dependent gene sets.



390           Finally we examined what the relevance is of UBP6- and UBP7-regulated  
391 transcriptional activity of NPR1 in context of plant immunity. We first treated plants with  
392 or without SA before challenge inoculation with virulent *Psm* ES4326. SA treatment  
393 induced resistance in WT plants but did not block bacterial propagation in *ubp6/7*  
394 plants (Figure 6H). Collectively, these data clearly demonstrate that UBP6 and UBP7  
395 are required for NPR1 coactivator activity and associated development of SA-  
396 dependent immunity.

## 397 **DISCUSSION**

398 The ubiquitin-mediated proteasome system plays vital roles in the regulation of  
399 eukaryotic gene expression, in large part by controlling the abundance of  
400 transcriptional regulators. Paradoxically, proteasome-dependent instability of selected  
401 potent eukaryotic transcriptional activators is necessary for the expression of their  
402 target genes. It is thought that their transcription-coupled degradation ensures the  
403 target promoter is continuously supplied with fresh activators that reinitiate  
404 transcription, thereby maximising gene expression (Geng et al., 2012; Kodadek et al.,  
405 2006). However, this sacrificial process is energy-expensive (Collins and Goldberg,  
406 2017; Peth et al., 2013), raising a dilemma of why such mechanisms evolved to  
407 regulate transcriptional activators. Our study on the immune coactivator NPR1,  
408 however, indicates that ubiquitin chain extension and trimming activities can fine-tune  
409 transcriptional outputs of unstable eukaryotic activators without strict requirement for  
410 sacrificial turnover.

411 We discovered that ubiquitination of NPR1 is processive, requiring the actions  
412 of CRL3 and the E4 ligase UBE4. In resting cells, CRL3-mediated turnover of NPR1 is  
413 important for preventing autoimmunity in absence of pathogen threat (Spoel et al.,  
414 2009). The NPR1-dependent autoimmune phenotype of *ube4* mutants is reminiscent  
415 of that observed in *cul3a cul3b* mutants (Figure 1) (Spoel et al., 2009), suggesting that  
416 in addition to CRL3 ligase, UBE4 is required to clear NPR1 from the nucleus and  
417 prevent untimely activation of immunity. In presence of SA, however, CRL3-mediated  
418 ubiquitination induced NPR1 coactivator activity, whereas formation of polyubiquitin  
419 chains by UBE4 blocked its activity and ultimately led to proteasome-mediated  
420 turnover (Figures 2 and 3). Rather than initiating substrate ubiquitination, E4 ligases  
421 are thought to extend existing ubiquitin chains (Crosas et al., 2006; Koegl et al., 1999),

422 thereby determining substrate commitment to proteasome-mediated degradation and  
423 contributing to proteasome processivity (Aviram and Kornitzer, 2010; Koegl et al.,  
424 1999). Functionally these enzymes are emerging as important players in limiting the  
425 activity of immune receptors as well as potent eukaryotic transcriptional regulators.  
426 *Arabidopsis* UBE4/MUSE3 works in concert with a CRL1/SCF<sup>CPR1</sup> ligase to regulate  
427 stability of the intercellular immune receptors SNC1 and RPS2 that recognise  
428 pathogen invasion (Cheng et al., 2011; Gou et al., 2012; Huang et al., 2014). Taken  
429 together with our finding that UBE4 acts in concert with CRL3 (Figures 3 and S2), this  
430 suggests a single E4 enzyme may assist in diverse ubiquitin-mediated pathways  
431 controlled by different E3 ligases.

432         The role of *Arabidopsis* UBE4 in ubiquitination and degradation of NPR1 are  
433 reminiscent of processive ubiquitination of the mammalian tumour suppressor p53, a  
434 potent transcriptional activator of genes involved in apoptosis, cell cycle arrest and  
435 cellular senescence. The stability of p53 is regulated by amongst others the E3 ligase  
436 MDM2 (or HDM2 in humans)(Pant and Lozano, 2014). Although MDM2 limits p53  
437 activity by promoting its turnover, MDM2 only catalyses multi-monoubiquitination of  
438 p53, which is insufficient for recognition by the proteasome (Lai et al., 2001).  
439 Progression to the polyubiquitinated form of p53 in the nucleus is carried out by the U-  
440 box E4 ligase UBE4B that interacts with both MDM2 and p53 (Li et al., 2003; Wu and  
441 Leng, 2011; Wu et al., 2011). Although this is similar to the proposed roles of CRL3  
442 and UBE4 in controlling NPR1 stability, initial ubiquitination has different effects on p53  
443 and NPR1. While MDM2-mediated monoubiquitination controls nucleocytoplasmic  
444 trafficking of p53 (Li et al., 2003), it probably does not have a direct effect on intrinsic  
445 p53 activator activity. Instead, initial ubiquitination boosts NPR1 transcriptional  
446 coactivator activity, at least in part by enhancing target promoter occupancy in the short

447 term and potentially also by promoting genomic mobility of NPR1 in the longer term  
448 (Figure 3). Although it remains unclear if CRL3 adds only monoubiquitin or generates  
449 short chains shy of tetraubiquitin, the minimal signal required for proteasome  
450 recognition (Thrower et al., 2000), progression to polyubiquitin chain formation by  
451 UBE4 results in transcriptional shut down as polyubiquitinated NPR1 still occupied  
452 target promoters but lacked transcriptional potency (Figure 6D and 6F). This type of  
453 processive ubiquitination may be a general mechanism to control unstable  
454 transcriptional (co)activators in eukaryotes. For example, multi-monoubiquitination of  
455 the oncogenic growth coactivator SRC-3 results in its transcriptional activation, while  
456 subsequent chain extension targets it for degradation, but E4 ligases have not yet been  
457 implicated. We propose here that processive ubiquitination established by the  
458 sequential actions of E3 and E4 ligases may generate a transcriptional timer that  
459 controls the activity and lifetime of unstable (co)activators (Figure 7).

460 The complexity of the ubiquitin-dependent transcriptional timer was further  
461 revealed by the identification of UBP6 and UBP7 that deubiquitinated NPR1, thereby  
462 regulating its transcriptional activity and lifetime (Figures 5 and 6). Several unstable  
463 mammalian transcription activators, including p53 and the immune activator NF- $\kappa$ B,  
464 are also regulated by diverse DUBs (Colleran et al., 2013; Pant and Lozano, 2014;  
465 Schweitzer and Naumann, 2015). In these cases DUBs promote transcription by  
466 stabilising p53 and NF- $\kappa$ B at their target promoters. For example, loss of USP7-  
467 mediated deubiquitination of NF- $\kappa$ B resulted in increased turnover and decreased  
468 promoter occupancy of NF- $\kappa$ B (Colleran et al., 2013). Similarly, we found that knockout  
469 of UBP6 and UBP7 resulted in enhanced turnover and transcriptional output of NPR1  
470 (Figure 6). However, inhibition of UBP6/7 deubiquitination activities with WP1130  
471 resulted in enhanced occupancy of transcriptionally inactive NPR1 at the *PR1* target

472 promoter (Figure 6F). These data suggest that (i) like their yeast and mammalian  
473 counterparts (Hanna et al., 2006; Lee et al., 2016), UBP6 and UBP7 exhibit  
474 proteasome inhibitory activities that at least temporarily prolong promoter occupancy  
475 by NPR1, and (ii) UBP6 and UBP7 prevent inactivation of NPR1 by opposing the  
476 formation of long ubiquitin chains.

477 UBP6 showed a similar DUB activity as its mammalian homologue USP14 (Lee  
478 et al., 2016), in that it appeared to deubiquitinate NPR1 by removing ubiquitin chains  
479 en bloc (Figure 6C, 6D). Such activity places this DUB in direct opposition to UBE4-  
480 mediated chain extension activity. In yeast Ubp6 was previously reported to oppose  
481 ubiquitin chain extension activity of the E4 ligase Hul5, thereby regulating substrate  
482 recruitment to the proteasome (Crosas et al., 2006). Similarly, Arabidopsis UBP6 and  
483 UBP7 opposed ubiquitin ligase activities to extend the lifetime of transcriptionally active  
484 NPR1. Although we cannot rule out that these DUBs function in opposition to CRL3,  
485 their en bloc ubiquitin removal activity suggests they more likely remove longer  
486 ubiquitin chains generated by UBE4 (Figure 7).

487 In summary, we report that disparate ubiquitin modifying enzymes play  
488 important roles in establishment of plant immune responses. We demonstrate that the  
489 opposing actions of an E3 and E4 ligase pair and two DUBs can fine-tune  
490 transcriptional outputs of the unstable immune coactivator NPR1 without strict  
491 requirement for its sacrificial turnover. Dynamicity in conjugated ubiquitin chain length  
492 may be a powerful mechanism for controlling the activity of unstable eukaryotic  
493 (co)activators in general.

494 **ACKNOWLEDGEMENTS**

495 We thank Dr Xia Cui for sharing *ubp12-2w* seeds. This work was supported by a Royal  
496 Society University Research Fellowship (UF090321), a BBSRC grant (BB/L006219/1),  
497 and the European Research Council (ERC) under the European Union's Horizon 2020  
498 research and innovation programme (grant agreement No 678511).

499

500 **AUTHOR CONTRIBUTIONS**

501 Conceptualisation, M.J.S. and S.H.S.; Methodology, M.J.S. and S.H.S.; Formal  
502 analysis, M.J.S., and S.H.S.; Investigation, M.J.S. and, J.J.F., H.L.G, K.W.W, and  
503 S.H.S.; Writing, M.J.S. and S.H.S.; Visualisation, M.J.S. and S.H.S.; Supervision,  
504 M.J.S. and S.H.S.; Project administration, S.H.S.; Funding acquisition, S.H.S.

505

506 **DECLARATION OF INTERESTS**

507 The authors declare no competing interests.

508 **REFERENCES**

- 509 Aleo, E., Henderson, C.J., Fontanini, A., Solazzo, B., and Brancolini, C. (2006).  
510 Identification of new compounds that trigger apoptosome-independent caspase  
511 activation and apoptosis. *Cancer Res* 66, 9235-9244.
- 512 Alonso, J.M. (2003). Genome-wide insertional mutagenesis of *Arabidopsis thaliana*  
513 (vol 301, pg 653, 2003). *Science* 301, 1849-1849.
- 514 Altun, M., Kramer, H.B., Willems, L.I., McDermott, J.L., Leach, C.A., Goldenberg,  
515 S.J., Kumar, K.G., Konietzny, R., Fischer, R., Kogan, E., *et al.* (2011). Activity-based  
516 chemical proteomics accelerates inhibitor development for deubiquitylating enzymes.  
517 *Chem Biol* 18, 1401-1412.
- 518 Aviram, S., and Kornitzer, D. (2010). The ubiquitin ligase Hul5 promotes proteasomal  
519 processivity. *Mol Cell Biol* 30, 985-994.
- 520 Borodovsky, A., Kessler, B.M., Casagrande, R., Overkleeft, H.S., Wilkinson, K.D.,  
521 and Ploegh, H.L. (2001). A novel active site-directed probe specific for  
522 deubiquitylating enzymes reveals proteasome association of USP14. *EMBO J* 20,  
523 5187-5196.
- 524 Cao, H., Bowling, S.A., Gordon, A.S., and Dong, X. (1994). Characterization of an  
525 *Arabidopsis* Mutant That Is Nonresponsive to Inducers of Systemic Acquired  
526 Resistance. *Plant Cell* 6, 1583-1592.
- 527 Cao, H., Glazebrook, J., Clarke, J.D., Volko, S., and Dong, X. (1997). The  
528 *Arabidopsis* NPR1 gene that controls systemic acquired resistance encodes a novel  
529 protein containing ankyrin repeats. *Cell* 88, 57-63.
- 530 Cheng, Y.T., Li, Y., Huang, S., Huang, Y., Dong, X., Zhang, Y., and Li, X. (2011).  
531 Stability of plant immune-receptor resistance proteins is controlled by SKP1-

532 CULLIN1-F-box (SCF)-mediated protein degradation. *Proc Natl Acad Sci U S A* *108*,  
533 14694-14699.

534 Clough, S.J., and Bent, A.F. (1998). Floral dip: a simplified method for  
535 *Agrobacterium*-mediated transformation of *Arabidopsis thaliana*. *Plant J* *16*, 735-743.

536 Colleran, A., Collins, P.E., O'Carroll, C., Ahmed, A., Mao, X., McManus, B., Kiely,  
537 P.A., Burstein, E., and Carmody, R.J. (2013). Deubiquitination of NF- $\kappa$ B by  
538 Ubiquitin-Specific Protease-7 promotes transcription. *Proc Natl Acad Sci U S A* *110*,  
539 618-623.

540 Collins, G.A., and Goldberg, A.L. (2017). The Logic of the 26S Proteasome. *Cell* *169*,  
541 792-806.

542 Crosas, B., Hanna, J., Kirkpatrick, D.S., Zhang, D.P., Tone, Y., Hathaway, N.A.,  
543 Buecker, C., Leggett, D.S., Schmidt, M., King, R.W., *et al.* (2006). Ubiquitin chains  
544 are remodeled at the proteasome by opposing ubiquitin ligase and deubiquitinating  
545 activities. *Cell* *127*, 1401-1413.

546 Cui, X., Lu, F., Li, Y., Xue, Y., Kang, Y., Zhang, S., Qiu, Q., Zheng, S., Liu, B., Xu, X.,  
547 *et al.* (2013). Ubiquitin-specific proteases UBP12 and UBP13 act in circadian clock  
548 and photoperiodic flowering regulation in *Arabidopsis*. *Plant Physiol* *162*, 897-906.

549 Deveraux, Q., Ustrell, V., Pickart, C., and Rechsteiner, M. (1994). A 26 S protease  
550 subunit that binds ubiquitin conjugates. *J Biol Chem* *269*, 7059-7061.

551 Doelling, J.H., Yan, N., Kurepa, J., Walker, J., and Vierstra, R.D. (2001). The  
552 ubiquitin-specific protease UBP14 is essential for early embryo development in  
553 *Arabidopsis thaliana*. *Plant J* *27*, 393-405.

554 Earley, K., Haag, J., Pontes, O., Opper, K., Juehne, T., Song, K., and Pikaard, C.  
555 (2006). Gateway-compatible vectors for plant functional genomics and proteomics.  
556 *Plant Journal* *45*, 616-629.



557 Ewan, R., Pangestuti, R., Thornber, S., Craig, A., Carr, C., O'Donnell, L., Zhang, C.,  
558 and Sadanandom, A. (2011). Deubiquitinating enzymes AtUBP12 and AtUBP13 and  
559 their tobacco homologue NtUBP12 are negative regulators of plant immunity. *New*  
560 *Phytol* *191*, 92-106.

561 Geng, F., Wenzel, S., and Tansey, W.P. (2012). Ubiquitin and proteasomes in  
562 transcription. *Annu Rev Biochem* *81*, 177-201.

563 Gou, M., Shi, Z., Zhu, Y., Bao, Z., Wang, G., and Hua, J. (2012). The F-box protein  
564 CPR1/CPR30 negatively regulates R protein SNC1 accumulation. *Plant J* *69*, 411-  
565 420.

566 Hanna, J., Hathaway, N.A., Tone, Y., Crosas, B., Elsasser, S., Kirkpatrick, D.S.,  
567 Leggett, D.S., Gygi, S.P., King, R.W., and Finley, D. (2006). Deubiquitinating enzyme  
568 Ubp6 functions noncatalytically to delay proteasomal degradation. *Cell* *127*, 99-111.

569 Hjerpe, R., Aillet, F., Lopitz-Otsoa, F., Lang, V., England, P., and Rodriguez, M.S.  
570 (2009). Efficient protection and isolation of ubiquitylated proteins using tandem  
571 ubiquitin-binding entities. *EMBO Rep* *10*, 1250-1258.

572 Hoppe, T. (2005). Multiubiquitylation by E4 enzymes: 'one size' doesn't fit all. *Trends*  
573 *Biochem Sci* *30*, 183-187.

574 Huang, Y., Minaker, S., Roth, C., Huang, S., Hieter, P., Lipka, V., Wiermer, M., and  
575 Li, X. (2014). An E4 ligase facilitates polyubiquitination of plant immune receptor  
576 resistance proteins in Arabidopsis. *Plant Cell* *26*, 485-496.

577 Kapuria, V., Peterson, L.F., Fang, D., Bornmann, W.G., Talpaz, M., and Donato, N.J.  
578 (2010). Deubiquitinase inhibition by small-molecule WP1130 triggers aggresome  
579 formation and tumor cell apoptosis. *Cancer Res* *70*, 9265-9276.

580 Kim, S.Y., Herbst, A., Tworkowski, K.A., Salghetti, S.E., and Tansey, W.P. (2003).  
581 Skp2 regulates Myc protein stability and activity. *Mol Cell* *11*, 1177-1188.

582 Kinkema, M., Fan, W., and Dong, X. (2000). Nuclear localization of NPR1 is required  
583 for activation of PR gene expression. *Plant Cell* 12, 2339-2350.

584 Kneeshaw, S., Gelineau, S., Tada, Y., Loake, G.J., and Spoel, S.H. (2014). Selective  
585 Protein Denitrosylation Activity of Thioredoxin-*h5* Modulates Plant Immunity. *Mol Cell*  
586 56, 153-162.

587 Kodadek, T., Sikder, D., and Nalley, K. (2006). Keeping transcriptional activators  
588 under control. *Cell* 127, 261-264.

589 Koegl, M., Hoppe, T., Schlenker, S., Ulrich, H.D., Mayer, T.U., and Jentsch, S.  
590 (1999). A novel ubiquitination factor, E4, is involved in multiubiquitin chain assembly.  
591 *Cell* 96, 635-644.

592 Lai, Z., Ferry, K.V., Diamond, M.A., Wee, K.E., Kim, Y.B., Ma, J., Yang, T., Benfield,  
593 P.A., Copeland, R.A., and Auger, K.R. (2001). Human mdm2 mediates multiple  
594 mono-ubiquitination of p53 by a mechanism requiring enzyme isomerization. *J Biol*  
595 *Chem* 276, 31357-31367.

596 Lee, B.H., Lu, Y., Prado, M.A., Shi, Y., Tian, G., Sun, S., Elsasser, S., Gygi, S.P.,  
597 King, R.W., and Finley, D. (2016). USP14 deubiquitinates proteasome-bound  
598 substrates that are ubiquitinated at multiple sites. *Nature* 532, 398-401.

599 Leggett, D.S., Hanna, J., Borodovsky, A., Crosas, B., Schmidt, M., Baker, R.T., Walz,  
600 T., Ploegh, H., and Finley, D. (2002). Multiple associated proteins regulate  
601 proteasome structure and function. *Mol Cell* 10, 495-507.

602 Li, M., Brooks, C.L., Wu-Baer, F., Chen, D., Baer, R., and Gu, W. (2003). Mono-  
603 versus polyubiquitination: differential control of p53 fate by Mdm2. *Science* 302,  
604 1972-1975.

605 Lipford, J.R., Smith, G.T., Chi, Y., and Deshaies, R.J. (2005). A putative stimulatory  
606 role for activator turnover in gene expression. *Nature* 438, 113-116.

607 Liu, Y., Lashuel, H.A., Choi, S., Xing, X., Case, A., Ni, J., Yeh, L.A., Cuny, G.D.,  
608 Stein, R.L., and Lansbury, P.T. (2003). Discovery of inhibitors that elucidate the role  
609 of UCH-L1 activity in the H1299 lung cancer cell line. *Chem Biol* 10, 837-846.  
610 Mou, Z., Fan, W., and Dong, X. (2003). Inducers of plant systemic acquired  
611 resistance regulate NPR1 function through redox changes. *Cell* 113, 935-944.  
612 Métivier, R., Penot, G., Hübner, M.R., Reid, G., Brand, H., Kos, M., and Gannon, F.  
613 (2003). Estrogen receptor-alpha directs ordered, cyclical, and combinatorial  
614 recruitment of cofactors on a natural target promoter. *Cell* 115, 751-763.  
615 Nelson, J.D., Denisenko, O., and Bomsztyk, K. (2006). Protocol for the fast chromatin  
616 immunoprecipitation (ChIP) method. *Nat Protoc* 1, 179-185.  
617 Pant, V., and Lozano, G. (2014). Limiting the power of p53 through the ubiquitin  
618 proteasome pathway. *Genes Dev* 28, 1739-1751.  
619 Peth, A., Nathan, J.A., and Goldberg, A.L. (2013). The ATP costs and time required  
620 to degrade ubiquitinated proteins by the 26 S proteasome. *J Biol Chem* 288, 29215-  
621 29222.  
622 Reid, G., Hübner, M.R., Métivier, R., Brand, H., Denger, S., Manu, D., Beaudouin, J.,  
623 Ellenberg, J., and Gannon, F. (2003). Cyclic, proteasome-mediated turnover of  
624 unliganded and liganded ERalpha on responsive promoters is an integral feature of  
625 estrogen signaling. *Mol Cell* 11, 695-707.  
626 Saleh, A., Withers, J., Mohan, R., Marqués, J., Gu, Y., Yan, S., Zavaliev, R., Nomoto,  
627 M., Tada, Y., and Dong, X. (2015). Posttranslational Modifications of the Master  
628 Transcriptional Regulator NPR1 Enable Dynamic but Tight Control of Plant Immune  
629 Responses. *Cell Host Microbe* 18, 169-182.

630 Schweitzer, K., and Naumann, M. (2015). CSN-associated USP48 confers stability to  
631 nuclear NF- $\kappa$ B/RelA by trimming K48-linked Ub-chains. *Biochim Biophys Acta* 1853,  
632 453-469.

633 Sessions, A., Burke, E., Presting, G., Aux, G., McElver, J., Patton, D., Dietrich, B.,  
634 Ho, P., Bacwaden, J., Ko, C., *et al.* (2002). A high-throughput Arabidopsis reverse  
635 genetics system. *Plant Cell* 14, 2985-2994.

636 Skelly, M.J., Frungillo, L., and Spoel, S.H. (2016). Transcriptional regulation by  
637 complex interplay between post-translational modifications. *Curr Opin Plant Biol* 33,  
638 126-132.

639 Spoel, S.H., and Dong, X. (2012). How do plants achieve immunity? Defence without  
640 specialized immune cells. *Nat Rev Immunol* 12, 89-100.

641 Spoel, S.H., Mou, Z., Tada, Y., Spivey, N.W., Genschik, P., and Dong, X. (2009).  
642 Proteasome-mediated turnover of the transcription coactivator NPR1 plays dual roles  
643 in regulating plant immunity. *Cell* 137, 860-872.

644 Thrower, J.S., Hoffman, L., Rechsteiner, M., and Pickart, C.M. (2000). Recognition of  
645 the polyubiquitin proteolytic signal. *Embo J* 19, 94-102.

646 Vierstra, R.D. (2009). The ubiquitin-26S proteasome system at the nexus of plant  
647 biology. *Nature Reviews Molecular Cell Biology* 10, 385-397.

648 von der Lehr, N., Johansson, S., Wu, S., Bahram, F., Castell, A., Cetinkaya, C.,  
649 Hydbring, P., Weidung, I., Nakayama, K., Nakayama, K.I., *et al.* (2003). The F-box  
650 protein Skp2 participates in c-Myc proteosomal degradation and acts as a cofactor  
651 for c-Myc-regulated transcription. *Mol Cell* 11, 1189-1200.

652 Wang, D., Amornsiripanitch, N., and Dong, X. (2006). A genomic approach to identify  
653 regulatory nodes in the transcriptional network of systemic acquired resistance in  
654 plants. *PLoS Pathog* 2, e123.

- 655 Wildermuth, M.C., Dewdney, J., Wu, G., and Ausubel, F.M. (2001). Isochorismate  
656 synthase is required to synthesize salicylic acid for plant defence. *Nature* *414*, 562-  
657 565.
- 658 Withers, J., and Dong, X. (2016). Posttranslational Modifications of NPR1: A Single  
659 Protein Playing Multiple Roles in Plant Immunity and Physiology. *PLoS Pathog* *12*,  
660 e1005707.
- 661 Wu, H., and Leng, R.P. (2011). UBE4B, a ubiquitin chain assembly factor, is required  
662 for MDM2-mediated p53 polyubiquitination and degradation. *Cell Cycle* *10*, 1912-  
663 1915.
- 664 Wu, H., Pomeroy, S.L., Ferreira, M., Teider, N., Mariani, J., Nakayama, K.I.,  
665 Hatakeyama, S., Tron, V.A., Saltibus, L.F., Spyropoulos, L., *et al.* (2011). UBE4B  
666 promotes Hdm2-mediated degradation of the tumor suppressor p53. *Nat Med* *17*,  
667 347-355.
- 668 Wu, R.C., Feng, Q., Lonard, D.M., and O'Malley, B.W. (2007). SRC-3 coactivator  
669 functional lifetime is regulated by a phospho-dependent ubiquitin time clock. *Cell* *129*,  
670 1125-1140.
- 671 Yamaguchi, N., Winter, C.M., Wu, M.F., Kwon, C.S., William, D.A., and Wagner, D.  
672 (2014). PROTOCOLS: Chromatin Immunoprecipitation from Arabidopsis Tissues.  
673 *Arabidopsis Book* *12*, e0170.
- 674 Yang, P., Smalle, J., Lee, S., Yan, N., Emborg, T.J., and Vierstra, R.D. (2007).  
675 Ubiquitin C-terminal hydrolases 1 and 2 affect shoot architecture in Arabidopsis.  
676 *Plant J* *51*, 441-457.
- 677 Young, P., Deveraux, Q., Beal, R.E., Pickart, C.M., and Rechsteiner, M. (1998).  
678 Characterization of two polyubiquitin binding sites in the 26 S protease subunit 5a. *J*  
679 *Biol Chem* *273*, 5461-5467.

680 **FIGURES**

681

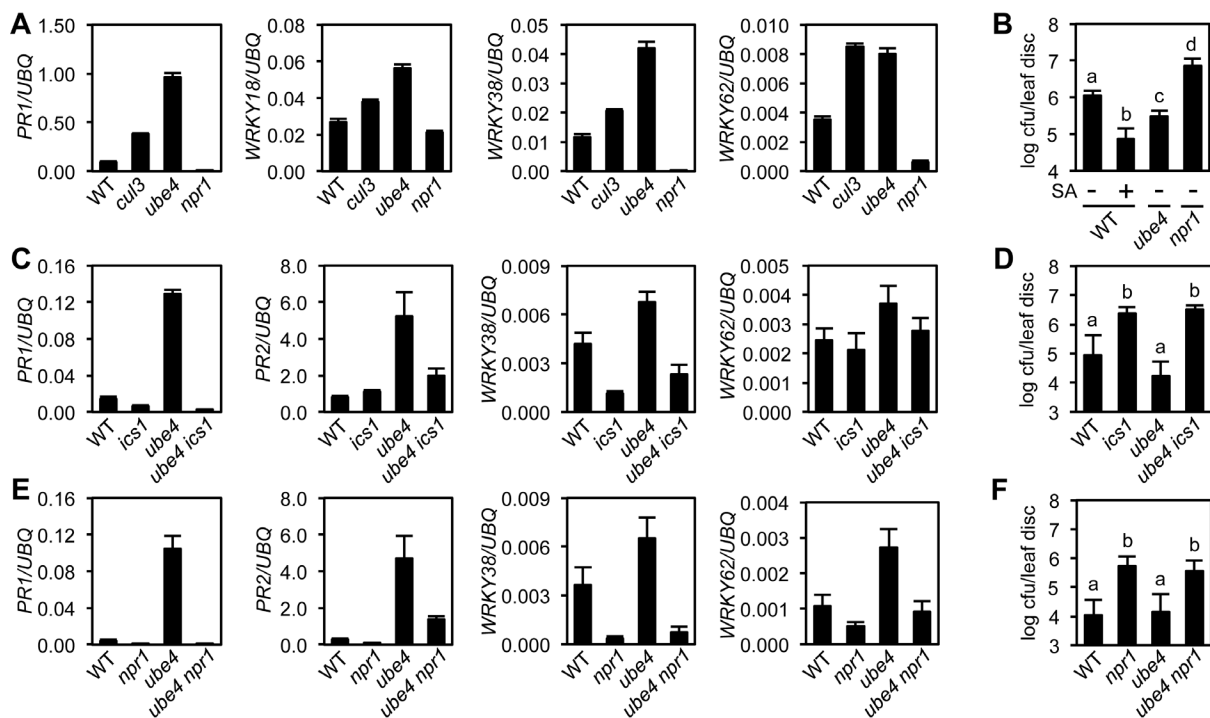

682

683

684 **Figure 1. The E4 ubiquitin ligase UBE4 regulates SA-mediated plant immunity**

685 **(A)** Expression of NPR1 target genes normalised relative to constitutively expressed  
686 *UBQ5* in four-week old plants of the indicated genotypes. Data points represent mean  
687  $\pm$  SD (n=3).

688 **(B)** Adult plants were treated with or without 0.5 mM SA 24h prior to inoculation with  
689  $5 \times 10^6$  colony forming units (cfu)/ml *Psm* ES4326. Leaf discs were analysed for  
690 bacterial growth 4 days post-infection (dpi). Error bars represent 95% confidence limits,  
691 while letters denote statistically significant differences between samples (Tukey  
692 Kramer ANOVA;  $\alpha = 0.05$ , n = 8).

693 **(C)** Expression of NPR1 target genes was analysed as in (A).

694 **(D)** Adult plants were inoculated with  $5 \times 10^5$  cfu/ml *Psm* ES4326 and leaf discs were  
695 analysed for bacterial growth at 4 dpi. Error bars represent 95% confidence limits, while  
696 letters denote statistically significant differences between samples (Tukey Kramer  
697 ANOVA;  $\alpha = 0.05$ , n = 8).

698 **(E)** Basal expression of NPR1 target genes were analysed as in (A).

699 **(F)** Adult plants of indicated genotypes were infected and analysed as in (D).

700 See also Figure S1.

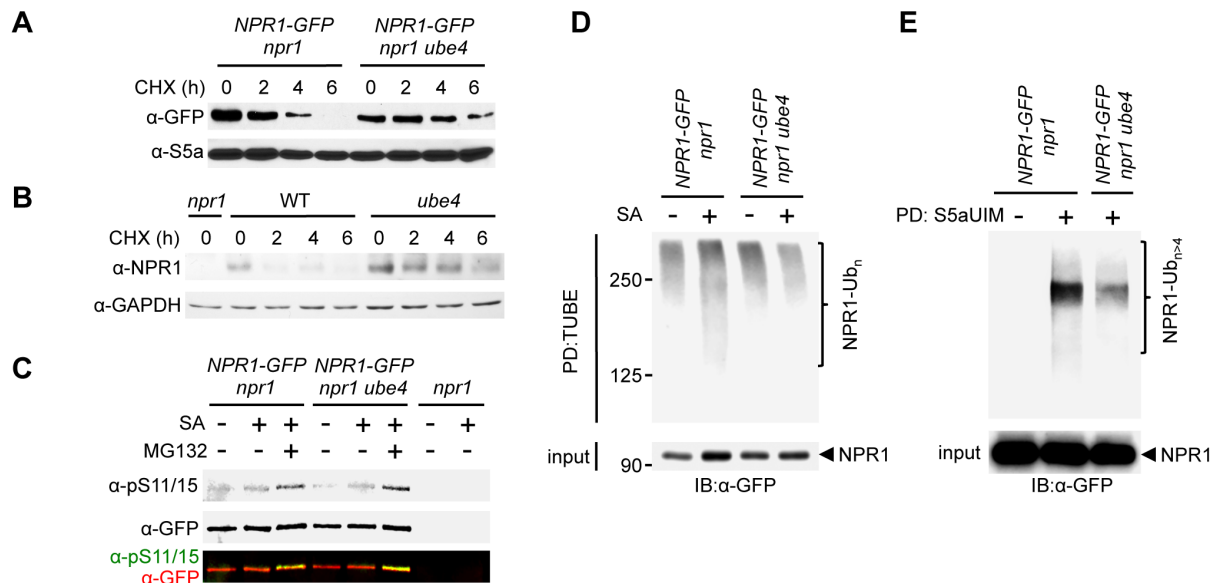

701  
702

703 **Figure 2. UBE4 facilitates polyubiquitination and degradation of NPR1**  
704 **coactivator**

705 **(A)** Seedlings expressing *35S::NPR1-GFP* in the indicated genetic backgrounds were  
706 treated with 0.5 mM SA for 24h before addition of 100  $\mu$ M CHX to inhibit protein  
707 synthesis. NPR1-GFP protein levels were monitored by immunoblot analysis, while  
708 S5a levels confirmed equal loading.

709 **(B)** Seedlings were treated with 0.5 mM SA for 24h before addition of 100  $\mu$ M CHX.  
710 Endogenous NPR1 protein levels were then monitored at the indicated times by  
711 immunoblot analysis, while GAPDH levels confirmed equal loading.

712 **(C)** Seedlings expressing *35S::NPR1-GFP* in the indicated genetic backgrounds were  
713 pre-treated with 0.5 mM SA for 2h followed by addition of vehicle (DMSO) or 100  $\mu$ M  
714 MG132 for an additional 4h. Phosphorylated Ser11/15 (pS11/15) and total NPR1-GFP  
715 levels were then determined by immunoblotting.

716 **(D)** Seedlings expressing *35S::NPR1-GFP* in the indicated genetic backgrounds were  
717 pre-treated with 0.5 mM SA for 6h followed by addition of 100  $\mu$ M MG132 for an  
718 additional 18h before ubiquitinated proteins were pulled down using GST-TUBEs.  
719 Input and ubiquitinated NPR1-GFP (NPR1-Ub<sub>n</sub>) were detected by immunoblotting with  
720 a GFP antibody.

721 **(E)** Seedlings expressing *35S::NPR1-GFP* in the indicated genetic backgrounds were  
722 pre-treated with 0.5 mM SA for 2h followed by addition of 100  $\mu$ M MG132 for an  
723 additional 4h before ubiquitinated proteins were pulled down (PD) using His<sub>6</sub>-V5-S5a-  
724 UIMs. Total and long-chain polyubiquitinated NPR1-GFP (NPR1-Ub<sub>n>4</sub>) were detected  
725 by immunoblotting with GFP antibodies.

726 See also Figure S1.



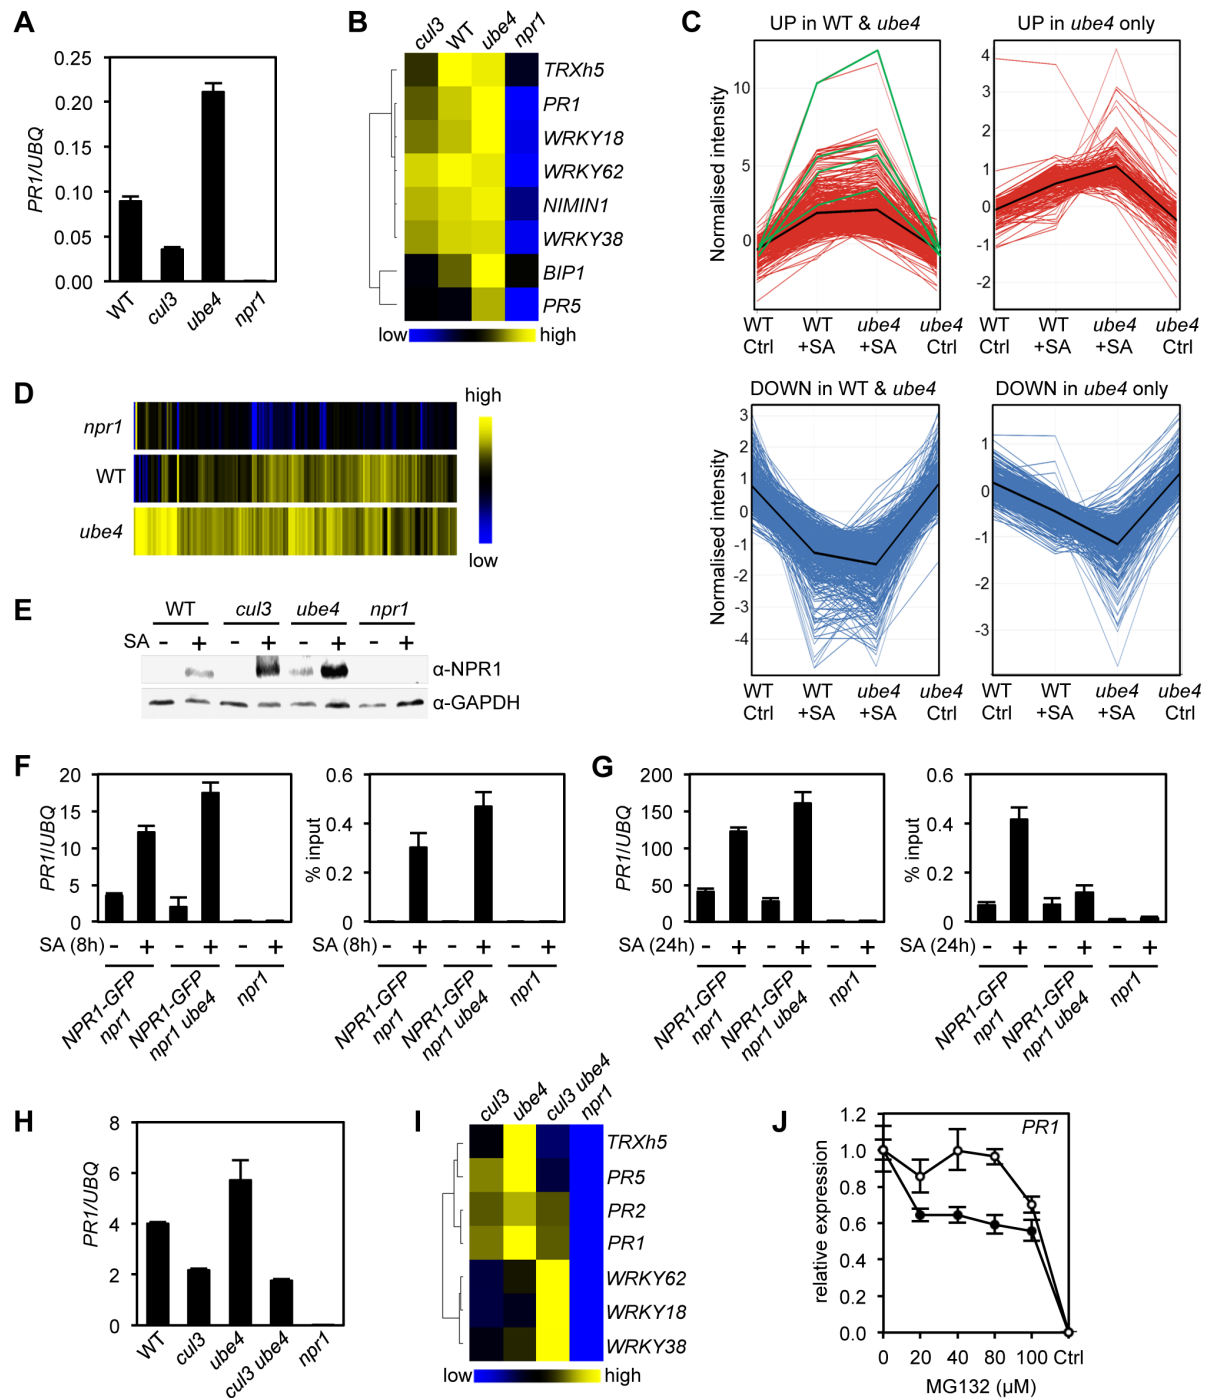

727  
728

729 **Figure 3. Processive ubiquitination controls transcriptional activity of NPR1**  
 730 (A) WT, *cul3a cul3b* (*cul3*), *ube4* and *npr1* seedlings were treated with 0.5 mM SA for  
 731 6h before determining *PR1* gene expression normalised relative to constitutively  
 732 expressed *UBQ5*. Data points represent mean  $\pm$  SD (n=3).  
 733 (B) Heat map of the expression of additional NPR1 target genes analysed as in (A).  
 734 (C) Seedlings treated with water (Ctrl) or 0.5 mM SA for 12h were analysed by RNA-  
 735 Seq. Only genes that were induced  $\geq 2$ -fold by SA in WT and/or *ube4* plants and  
 736 showed  $\geq 1.5$ -fold difference in expression in *npr1* mutants are shown (Benjamini  
 737 Hochberg FDR, 2-way ANOVA  $p \leq 0.05$ ). Graphs indicate genes that are up or down  
 738 regulated in both WT and *ube4* or only in *ube4*. *PR-1*, *WRKY18*, *WRKY38* and



739 *WRKY62* marker genes are indicated by green lines, whereas mean expression  
740 patterns are indicated by black lines.

741 **(D)** Heat map representation of genes from (C) that were upregulated by SA.

742 **(E)** WT, *cul3a cul3b (cul3)*, *ube4* and *npr1* seedlings were treated with water (-) or 0.5  
743 mM SA (+) for 6h. Endogenous NPR1 protein levels were monitored by immunoblot  
744 analysis, while GAPDH levels confirmed equal loading.

745 **(F)** Adult plants expressing *35S::NPR1-GFP* in the indicated genetic backgrounds  
746 were treated with 0.5 mM SA for 8h before analysing either *PR1* gene expression (left  
747 panel) or NPR1-GFP binding to the *as-1* motif of the *PR1* promoter (right panel).  
748 Mutant *npr1* plants served as a negative control. Data points represent mean  $\pm$  SD  
749 (n=3).

750 **(G)** As in (F) except plants were treated with 0.5 mM SA for 24h.

751 **(H)** WT, *cul3a cul3b (cul3)* double, *ube4* single, *cul3a cul3b ube4 (cul3 ube4)* triple and  
752 *npr1* single mutant seedlings were treated with 0.5 mM SA for 6h and *PR1* gene  
753 expression determined by normalising against constitutively expressed *UBQ5*. Data  
754 points represent mean  $\pm$  SD (n=3).

755 **(I)** Heat map of the expression of additional NPR1 target genes analysed as in (F).

756 **(J)** WT (closed circles) and mutant *ube4* (open circles) seedlings expressing  
757 *35S::NPR1-GFP* were treated with 0.5 mM SA for 4h followed by the addition of  
758 indicated concentrations of MG132 for an additional 2 h. *PR1* gene expression was  
759 determined and normalised relative to constitutively expressed *UBQ5*. MG132  
760 treatments as well as a control (Ctrl) that received 4h of water treatment followed by  
761 the addition of vehicle (DMSO), were plotted relative to maximal SA-induced *PR1*  
762 expression. Data points represent mean  $\pm$  SD (n=3).

763 See also Figure S2.

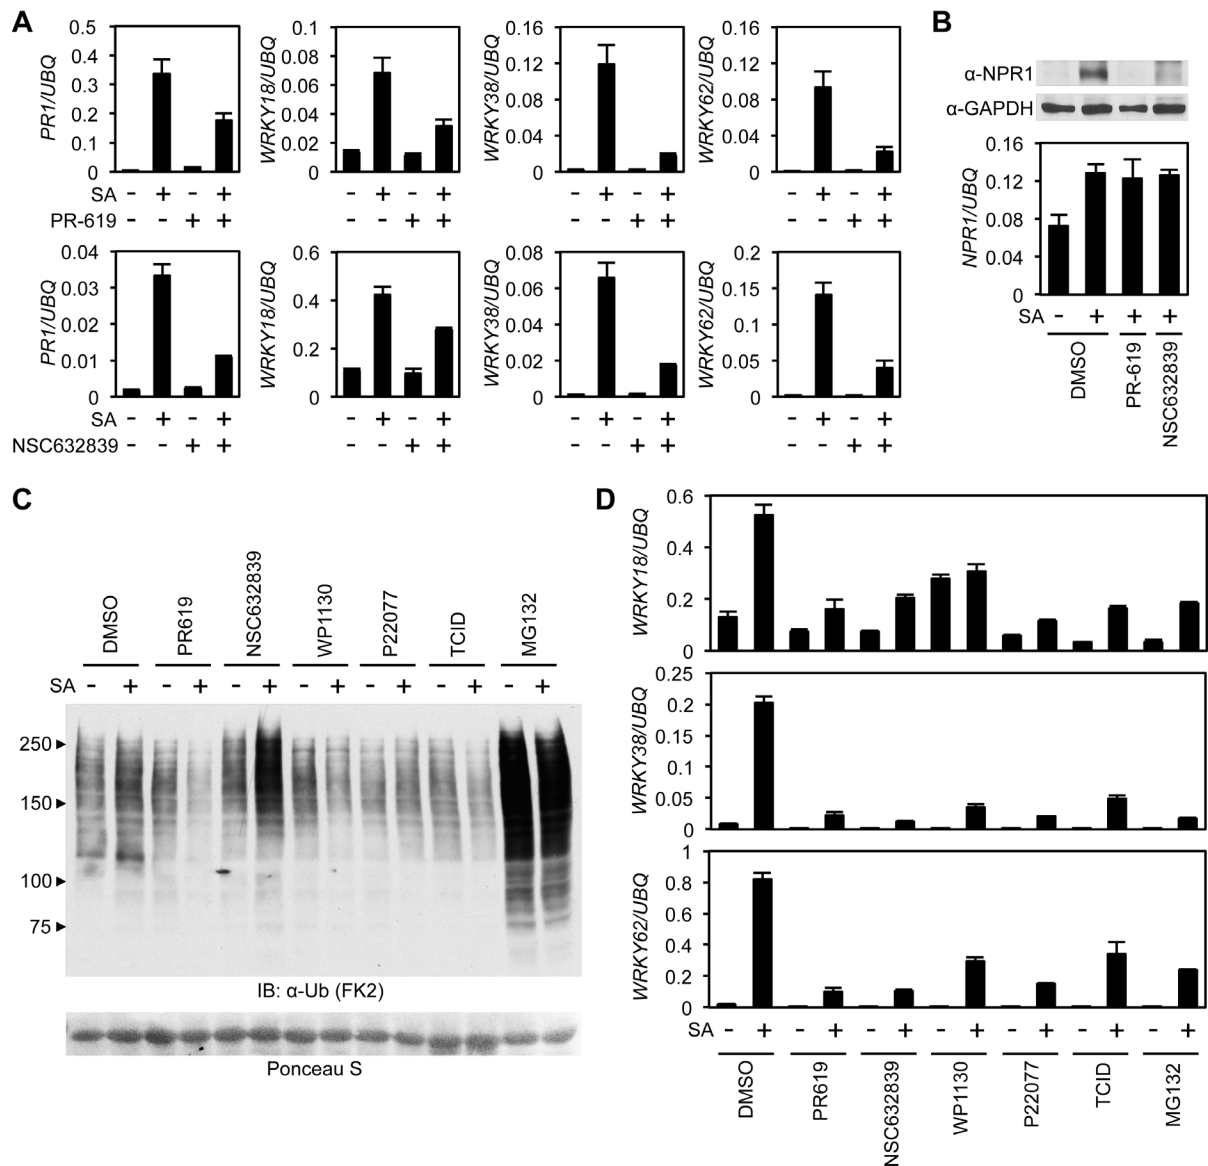

764

765

#### Figure 4. Deubiquitinases regulate NPR1-dependent transcription

766 **(A)** WT seedlings were treated for 6h with either vehicle control (DMSO) or the  
 767 indicated DUB inhibitors (50  $\mu$ M) in presence or absence of 0.5 mM SA before  
 768 analysing the expression of NPR1 target genes. Data points represent mean  $\pm$  SD  
 769 (n=3).

770 **(B)** WT seedlings were treated as in (A) before endogenous NPR1 and GAPDH  
 771 (loading control) protein levels were analysed by immunoblotting (top panel). NPR1  
 772 gene expression was also analysed from the same samples (bottom panel). Data  
 773 points represent mean  $\pm$  SD (n=3).

774 **(C)** WT seedlings were treated for 6h with vehicle (DMSO) or either the indicated DUB  
 775 inhibitors (50  $\mu$ M) or MG132 (100  $\mu$ M) in presence or absence of 0.5 mM SA before  
 776 immunoblotting against conjugated ubiquitin (FK2). Ponceau S staining indicated  
 777 equal loading.

778 **(D)** WT seedlings were treated as in (C) and NPR1 target gene expression analysed.  
 779 Data points represent mean  $\pm$  SD (n=3).

780 See also Figure S3 and S4.

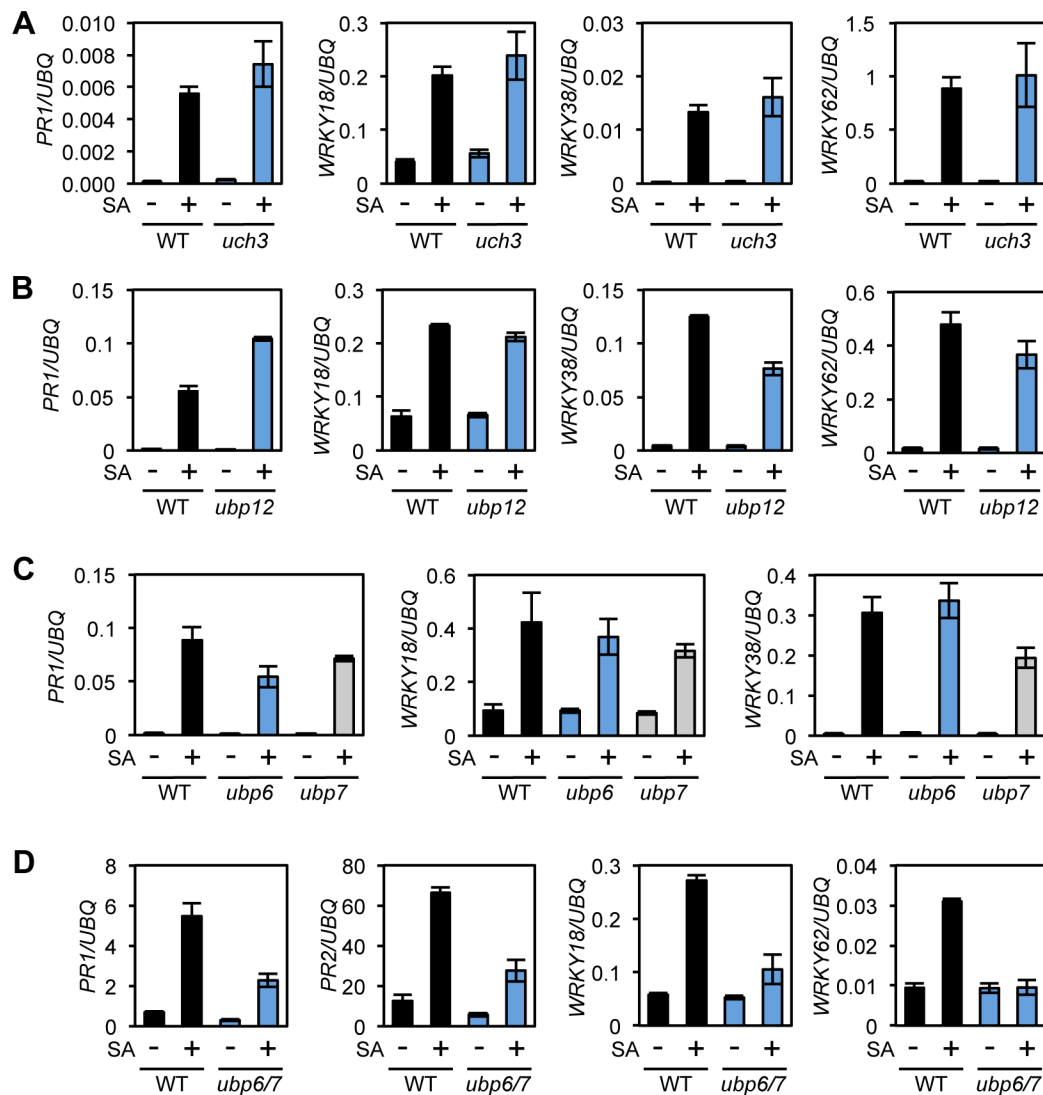

781

782

783 **Figure 5. UBP6 and UBP7 deubiquitinases are required for SA-induced**  
 784 **expression of NPR1 target genes**

785 **(A)** WT and *uch3-1* seedlings were treated for 6h with 0.5 mM SA followed by analysis  
 786 of NPR1 target gene expression. Data points represent mean  $\pm$  SD (n=3).

787 **(B)** WT and *ubp-12-2w* seedlings were treated and analysed as in (A).

788 **(C)** WT, *ubp6-1* and *ubp7-1* plants were treated with 0.5 mM SA for 24h before analysis  
 789 of NPR1 target gene expression. Data points represent mean  $\pm$  SD (n=3).

790 **(D)** WT and *ubp6-1 ubp7-1* double mutant plants were treated and analysed as in (C).

791 See also Figure S4.

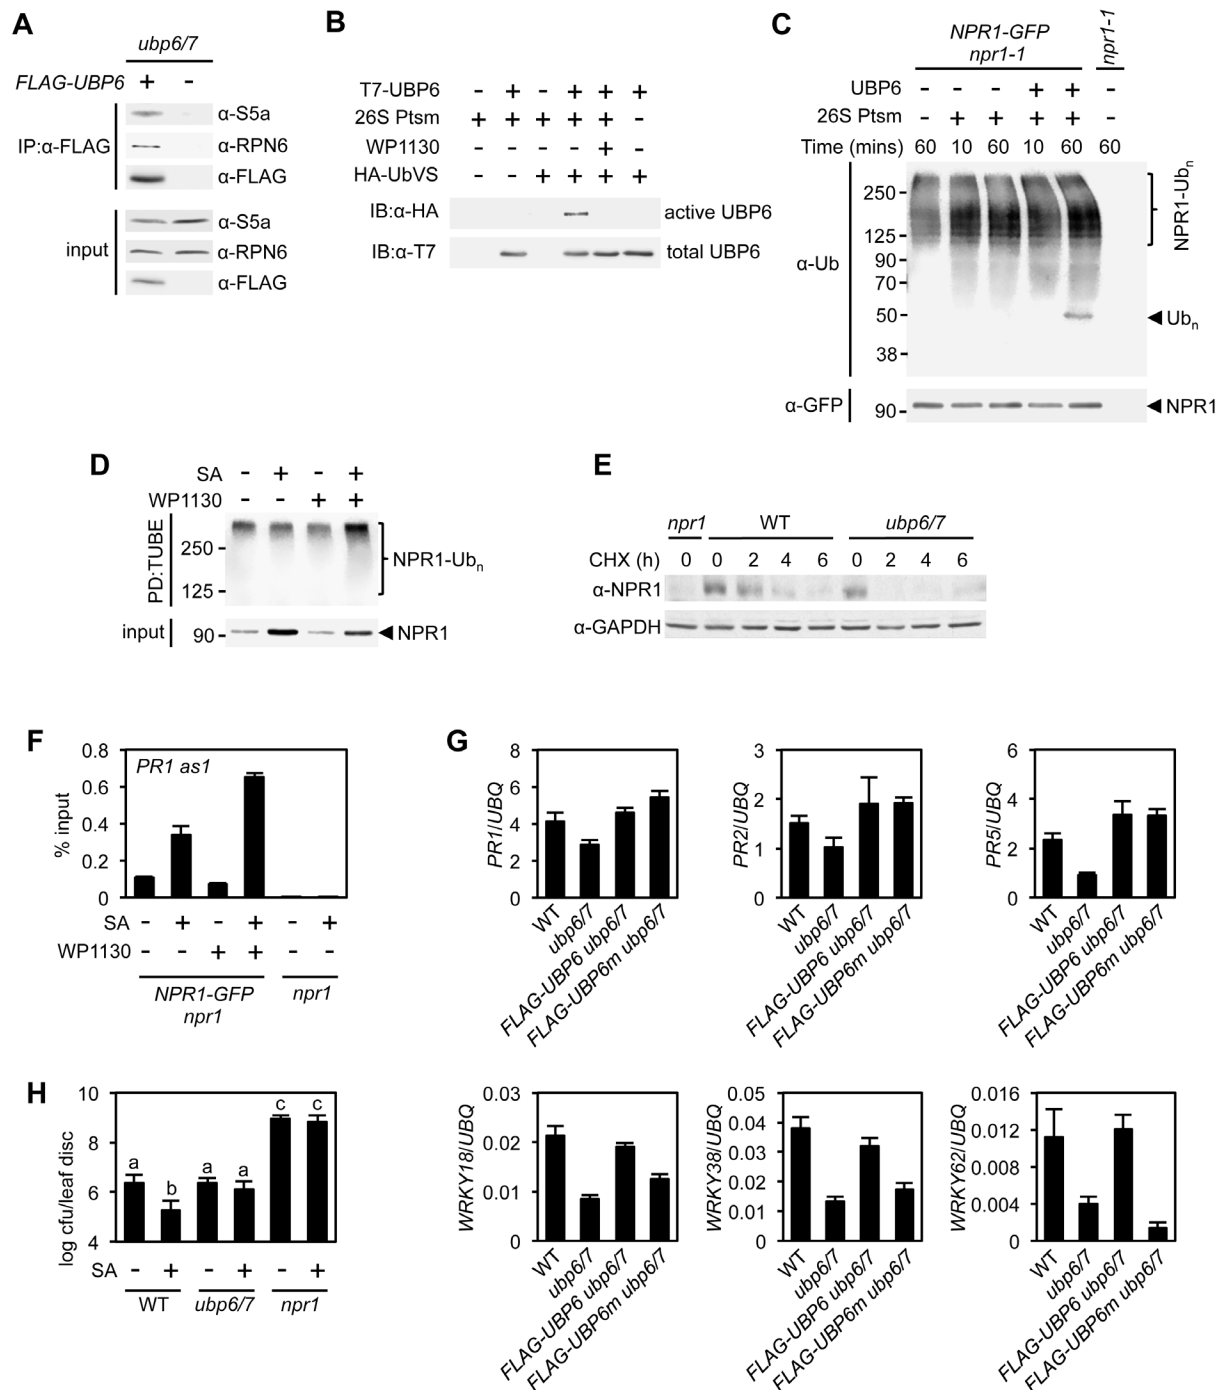

792

793

794

795

796

797

798

799

800

801

802

**Figure 6. Deubiquitination by UBP6/7 regulates transcriptional activity of NPR1**

(A) FLAG-UBP6 was immunoprecipitated (IP) from *ubp6 ubp7* plants transformed with or without *35S::FLAG-UBP6*. Co-immunoprecipitates were analysed by immunoblotting against FLAG as well as the proteasome subunits S5a and RPN6. Input protein levels are shown in the bottom panel.

(B) Purified recombinant His<sub>6</sub>-T7-UBP6 was preincubated with or without WP1130 and 26S proteasomes before labelling with HA-UbVS. Immunoblotting with HA antibodies detected active, labelled UBP6 while immunoblotting with T7 antibodies detected total levels of UBP6.

803 **(C)** *35S::NPR1-GFP* seedlings were treated for 6h with 0.5 mM SA followed by addition  
804 of 100  $\mu$ M MG132 for a further 18h. Polyubiquitinated NPR1-GFP protein was then  
805 purified with GFP-Trap agarose and incubated for the indicated times with recombinant  
806 UBP6 in presence or absence of 26S proteasomes. Remaining polyubiquitinated  
807 NPR1-GFP and released ubiquitin species were detected by immunoblotting using an  
808 antibody against ubiquitin (P4D1), while unmodified NPR1-GFP was detected with an  
809 anti-GFP antibody.

810 **(D)** *35S::NPR1-GFP* seedlings were treated for 2h with 0.5 mM SA followed by addition  
811 of 50  $\mu$ M WP1130 or DMSO vehicle for a further 4h. Ubiquitinated proteins were pulled  
812 down using GST-TUBEs. Input and ubiquitinated NPR1-GFP (NPR1-Ub<sub>n</sub>) were  
813 detected by immunoblotting with a GFP antibody.

814 **(E)** Seedlings were treated with SA for 24h to induce NPR1 before addition of 100  $\mu$ M  
815 CHX. Endogenous NPR1 protein levels were monitored by immunoblotting and  
816 GAPDH levels confirmed equal loading.

817 **(F)** *35S::NPR1-GFP* seedlings were treated for 2h with 0.5 mM SA followed by addition  
818 of 50  $\mu$ M WP1130 or DMSO vehicle for a further 4h. NPR1-GFP binding to the *as-1*  
819 motif of the *PR1* promoter element was quantified by ChIP with *npr1* seedlings serving  
820 as a negative control. Data points represent mean  $\pm$  SD (n=3).

821 **(G)** Plants of the stated genotypes were treated with 0.5 mM SA for 24h before the  
822 expression of NPR1 target genes was analysed by qPCR. Data points represent mean  
823  $\pm$  SD (n=3).

824 **(H)** Plants were treated with or without 0.5 mM SA 24h prior to inoculation with  $5 \times 10^6$   
825 colony forming units (cfu)/ml *Psm* ES4326. Leaf discs were analysed for bacterial  
826 growth at 3 dpi. Error bars represent 95% confidence limits, while letters denote  
827 statistically significant differences between samples (Tukey Kramer ANOVA;  $\alpha = 0.05$ ,  
828 n = 8).

829 See also Figure S5.

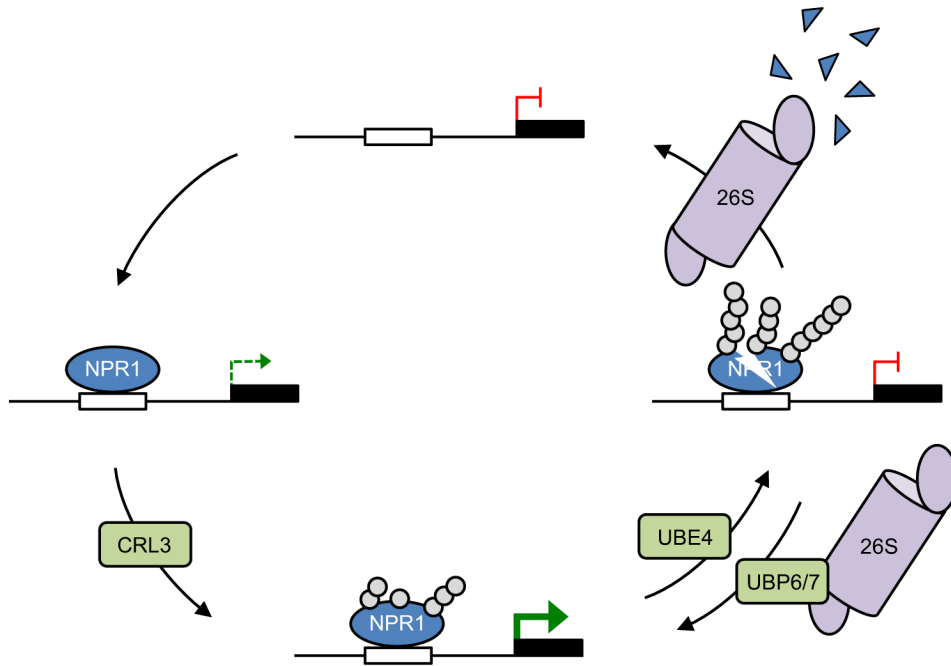

830

831

832 **Figure 7. Working model for how dynamic ubiquitination regulates**  
833 **transcriptional outputs of NPR1.**

834 NPR1 occupancy at target gene promoters initiates low-level transcription (dashed  
835 green arrow). Initial ubiquitin (grey circles) modifications mediated by CRL3 ligase  
836 enhances target gene expression to maximum levels (solid green arrow), while  
837 progression to long-chain polyubiquitination mediated by UBE4 promotes the  
838 proteasome-mediated degradation of NPR1 and inactivates target gene expression.  
839 UBP6/7 activity at the proteasome serves to limit the degradation of NPR1, thereby  
840 promoting its active state.

## 841 MATERIALS AND METHODS

### 842 Plant maintenance, transformation, chemical treatments and pathogen infection

843 All *Arabidopsis* plants used in this study were in the Columbia genetic  
844 background, with WT referring to wild-type Col-0 throughout. Plants were grown under  
845 long day conditions (16 hour photoperiod) on soil in controlled-environment growth  
846 chambers at 65% humidity and 22°C unless otherwise stated. Seeds were stratified at  
847 4-8°C in darkness for 2 days before moving to growth chambers. Plants were grown  
848 in a soil mix composed of peat moss, vermiculite and sand at a ratio of 4:1:1  
849 respectively, and illumination was provided by fluorescent tube lighting at an intensity  
850 of 70-100  $\mu\text{mol m}^{-2}\text{sec}^{-1}$ . For experiments on seedlings, seeds were sterilized by  
851 washing in 100% ethanol for 2 mins before incubating in 50% household bleach for 20  
852 mins. After removal of bleach, seeds were washed at least 3 times with sterile H<sub>2</sub>O  
853 before use. Sterilized seeds were spotted on Murashige and Skoog agar media and  
854 stratified before placing under lighting conditions as above. All T-DNA insertion  
855 mutants used were genotyped by PCR using standard conditions with gene specific  
856 primers in combination with left-border primers specific to each mutant collection  
857 (Table S2).

858 The coding sequences of the *UBE4* (At5g15400) and *UBP6* (At1g51710) genes  
859 were amplified using Phusion polymerase (NEB) from WT *Arabidopsis* cDNA with the  
860 addition of CACC at the 5' end required for TOPO cloning. The PCR products were  
861 gel-purified and cloned in to the pENTR/D-TOPO vector (Invitrogen) according to  
862 manufacturers' instructions. The active site residue of UB6 was then mutagenised to  
863 serine (C113S) using QuikChange Site-Directed Mutagenesis Kit according to  
864 manufacturers' instructions. Genes were then recombined into pEarleyGate 104 and  
865 202 plasmids by LR reaction (Invitrogen) as described previously (Earley et al., 2006)



866 to generate *35S::YFP-UBE4*, *35S::FLAG-UBP6* and *35S::FLAG-UBP6(C113S)*  
867 constructs. These plasmids were used to transform protoplasts or to transform  
868 *Agrobacterium tumifaciens* strain GV3101 (pMP90) as described previously  
869 (Kneeshaw et al., 2014). After selection of positive *Agrobacterium* clones carrying the  
870 transgenes, approximately 6-week old flowering *ubp6/7* plants were transformed as  
871 previously described (Clough and Bent, 1998). Selection of transformants was  
872 performed by spraying 10-day old seedlings with 120 µg/l BASTA at least three times.  
873 Further confirmation of transformation was performed by immunoblotting. Segregation  
874 of BASTA resistance was analysed in the T<sub>2</sub> generation to confirm plants had single  
875 transgene insertions.

876 For SA treatments, adult plants were sprayed with, while seedlings were  
877 immersed in 0.5 mM SA or H<sub>2</sub>O. CHX, MG132 and DUB inhibitors were all used to  
878 treat seedlings by immersion at the concentrations stated in respective figure legends.  
879 Vehicle controls consisted of DMSO at the appropriate concentration for each chemical  
880 used.

881 *Psm* ES4326 was grown in LB media supplemented with 10 mM MgCl<sub>2</sub> and 50  
882 µg/ml streptomycin. Cultures were grown overnight then centrifuged at 4,000 rpm for  
883 10 mins. Cells were resuspended in 10 mM MgCl<sub>2</sub> and absorbance was measured at  
884 600nm before necessary dilutions were made to adjust concentrations to those  
885 indicated in figure legends. Plants were infected by pressure infiltration with a syringe  
886 through the abaxial leaf surface. For measurement of bacterial growth, a single leaf  
887 disc per plant was cut from infected leaves at the stated dpi and ground in 10 mM  
888 MgCl<sub>2</sub>. Serial dilutions were plated on LB supplemented with 10 mM MgCl<sub>2</sub> and 50  
889 µg/ml streptomycin and colonies were counted after 2 days incubation at 30°C.

890



## 891 **RNA extraction, cDNA synthesis and qPCR**

892 Leaf tissue or whole seedlings were frozen and ground to a fine powder in liquid  
893 nitrogen. Samples were homogenised in RNA extraction buffer (100 mM LiCl, 100 mM  
894 Tris pH 8, 10 mM EDTA, 1% SDS) before addition of an equal volume of  
895 phenol/chloroform/isoamylalcohol (25:24:1). The homogenate was vortexed and  
896 centrifuged at 13,000 rpm for 5 min. The aqueous phase was transferred to an equal  
897 volume of 24:1 chloroform/isoamylalcohol, vortexed and then centrifuged at 13,000  
898 rpm for 5 min. This step was repeated once before the aqueous layer was added to a  
899 1/3 volume of 8 M LiCl and incubated overnight at 4°C. The extract was then  
900 centrifuged at 13,000 rpm for 5 min at 4°C. The resulting pellet was washed with ice  
901 cold 70% ethanol then rehydrated and dissolved in 400 µl H<sub>2</sub>O for 30 min on ice.  
902 Finally, 40 µl of NaAc (pH 5.3) and 1 ml of ice cold 96% ethanol was added before  
903 incubating for 1 h at -20°C. The precipitate was then centrifuged at 13,000 rpm for 5  
904 min at 4°C, the pellet was washed with ice cold 70% ethanol and resuspended in 50  
905 µl of H<sub>2</sub>O. Before cDNA synthesis, RNA samples were quantified using a NanoDrop  
906 spectrophotometer (Thermo Scientific) and appropriate dilutions were made to  
907 ensure all samples contained equal amounts of RNA. Reverse transcription was then  
908 performed using SuperScript II reverse transcriptase (Invitrogen) according to the  
909 manufacturers' instructions. qPCR was carried out on 20-fold diluted cDNA using  
910 Power SYBR Green (Life Technologies) and gene-specific primers (Table S2) on a  
911 StepOne Plus Real Time PCR machine (Life Technologies).

912

## 913 **RNA-Seq**

914 RNA was extracted from biological duplicate samples as described above and further  
915 purified using an RNeasy Mini Kit (Qiagen) according to the manufacturer's

916 instructions. qPCR was carried out to confirm appropriate induction of SA-responsive  
917 marker genes. RNA was then quantified and submitted to GATC Biotech/Eurofins  
918 (Constance, Germany) for RNA sequencing. The RNA-Seq reads were aligned to the  
919 *Arabidopsis thaliana* TAIR10 genome using Bowtie. TopHat identified potential exon-  
920 exon splice junctions of the initial alignment. Strand NGS software in RNA-Seq  
921 workflow was used to quantify transcripts. Raw counts were normalised using DESeq  
922 with baseline transformation to the median of all samples. Data were then expressed  
923 as normalised signal values (*i.e.*  $\log_2[\text{RPKM}]$  where RPKM is read count per kilobase  
924 of exon model per million reads) for all statistical tests and plotting. Genes were then  
925 filtered by expression (20%-100%) and differentially expressed genes determined by  
926 Benjamini Hochberg FDR with 2-way ANOVA ( $p = 0.05$ ). Additionally, we required SA-  
927 induced genes to meet a  $\geq 2$ -fold change cut-off, whereas NPR1-dependent genes  
928 required  $\geq 1.5$ -fold change in Col-0 or *ube4* plants when compared to *npr1* mutants.

929

### 930 **Chromatin immunoprecipitation**

931 Chromatin immunoprecipitation was performed on leaf tissue of 4 week-old soil-  
932 grown adult plants essentially as described (Yamaguchi et al., 2014) but with minor  
933 modifications. 500 mg tissue was crosslinked with 1% formaldehyde by vacuum  
934 infiltration for 30 mins at room temperature. Glycine was added to a final concentration  
935 of 100 mM to quench crosslinking and vacuum infiltrated for a further 10 mins.  
936 Crosslinked tissue was washed twice with ice-cold PBS before all liquid was removed  
937 and tissue was frozen in liquid nitrogen. Nuclei were isolated and lysed as described  
938 (Yamaguchi et al., 2014) while sonication was performed using a BioRuptor Plus  
939 (Diagenode). Sonication consisted of 15 cycles of 30s ON, 30s OFF at high power.  
940 NPR1-GFP was immunoprecipitated using CHIP grade anti-GFP (Abcam) before

941 capture of immune complexes with Protein A agarose (Millipore). Crosslink reversal  
942 and protein removal was performed as described previously (Nelson et al., 2006), by  
943 boiling in the presence of Chelex 100 resin (BioRad) before incubation at 55°C with  
944 Proteinase K. Finally, DNA was cleaned up using PCR purification columns (Qiagen)  
945 and analysed by qPCR using primers listed in Table S2.

946

### 947 **Protein analysis**

948 For protein degradation assays and analysis of NPR1 levels, seedlings were  
949 frozen and ground to a fine powder in liquid nitrogen before homogenising in protein  
950 extraction buffer (PEB) (50 mM Tris-HCl (pH 7.5), 150 mM NaCl, 5 mM EDTA, 0.1%  
951 Triton X-100, 0.2% Nonidet P-40, and inhibitors: 50 µg/ml TPCK, 50 µg/ml TLCK, 0.6  
952 mM PMSF) (Spoel et al., 2009). For analyses of NPR1 phosphorylation PEB buffer  
953 was supplemented with 1X phosphatase inhibitor cocktail 3 (Sigma). Samples were  
954 centrifuged at 13,000 rpm for 15 min at 4°C to clarify extracts, and the resulting  
955 supernatant was used for SDS-PAGE and immunoblot analysis. All antibodies used  
956 are listed in the Table S3.

957 For analysis of polyubiquitination with TUBEs, seedlings were ground to a fine  
958 powder in liquid nitrogen and homogenized in 1x PBS supplemented with 1% Triton X-  
959 100, 10 mM NEM, 40 µM MG132, 50 µg/ml TPCK, 50 µg/ml TLCK, 0.6 mM PMSF,  
960 and 0.2 mg/ml GST-TUBE (Hjerpe et al., 2009). Homogenates were centrifuged at  
961 13,000 rpm at 4°C for 20 mins to remove cellular debris and filtered through 0.22 µm  
962 filters before overnight incubation with Protino Glutathione Agarose 4B (Machery  
963 Nagel), at 4°C with rotation. The agarose beads were washed 5 times with 1X PBS +  
964 1% Triton X-100 before elution by boiling in 1X SDS-PAGE sample buffer including 50  
965 mM DTT. NPR1-GFP was detected by immunoblotting with anti-GFP (Roche).

966 For analysis of long chain polyubiquitination, seedlings were ground to a fine  
967 powder in liquid nitrogen and homogenised in 1X PBS, supplemented with 1% Triton  
968 X-100, 10 mM NEM, 80  $\mu$ M MG115, 50  $\mu$ g/ml TPCK, 50  $\mu$ g/ml TLCK, 0.6 mM PMSF,  
969 1X phosphatase inhibitor cocktail 3 (Sigma). Homogenates were centrifuged at 13,000  
970 rpm at 4°C for 20 mins to remove cellular debris and filtered through 0.22  $\mu$ m filters  
971 before overnight incubation with 300  $\mu$ g His<sub>6</sub>-V5-S5aUIM protein immobilised on  
972 agarose. Agarose beads were washed 5 times with extraction buffer before elution at  
973 80°C for 15 mins in 1X SDS-PAGE sample buffer including 50 mM DTT. NPR1-GFP  
974 was detected by immunoblotting with anti-GFP (Roche).

975 For proteasome co-immunoprecipitation with FLAG-UBP6, seedlings were  
976 frozen and ground to a fine powder in liquid nitrogen before homogenising in  
977 proteasome extraction buffer (50 mM Tris-HCl (pH 7.4), 25 mM NaCl, 2 mM MgCl<sub>2</sub>, 1  
978 mM EDTA, 10 mM ATP, 5% glycerol, and inhibitors: 50  $\mu$ g/ml TPCK, 50  $\mu$ g/ml TLCK,  
979 0.6 mM PMSF). Extracts were centrifuged at 13,000 rpm at 4°C for 20 mins to remove  
980 cellular debris and filtered through 0.22  $\mu$ m filters. Anti-FLAG M2 affinity gel was  
981 washed with the above buffer before incubating with samples overnight with rotation  
982 at 4°C. The resin was washed 3 times with the same buffer before immunoprecipitated  
983 proteins were eluted by boiling in 1X SDS-PAGE sample buffer including 50 mM DTT.  
984 FLAG-UBP6 was detected using rabbit anti-FLAG antibodies while co-  
985 immunoprecipitating proteins were detected with indicated antibodies.

986

### 987 **Recombinant protein and NPR1 antibody production**

988 N-terminal GST-tagged TUBE was generated by cloning the coding sequence  
989 of hHR23A into pGEX-6P-1 using EcoRI and Sall restriction sites. Primers used are  
990 listed in Table S2. GST-TUBE expression was induced in BL21(DE3) *E. coli* cells with

991 the addition of 1 mM IPTG and cultures were incubated for a further 4 hrs at 28°C  
992 before collecting by centrifugation. Cells were then lysed in 1X PBS supplemented with  
993 1 mg/ml lysozyme, 25 U/ml Benzonase nuclease, 0.1% Triton-X-100 and a protease  
994 inhibitor cocktail before GST-TUBE was purified using Protino Glutathione Agarose 4B  
995 according to the manufacturers' instructions. Purified GST-TUBE was dialysed against  
996 1X PBS and stored with the addition of 10% glycerol at -80°C until use.

997       Recombinant S5aUIM protein was generated by synthesising residues 196 –  
998 309 from human S5a with codon optimisation for *E. coli* into pET151/D-TOPO. The  
999 resulting His<sub>6</sub>-V5-S5aUIM protein was expressed in BL21(DE3) *E. coli* cells by addition  
1000 of 1 mM IPTG and incubation for 24 hrs at 28°C before collecting by centrifugation.  
1001 Cells were then lysed in lysis buffer (50 mM KHPO<sub>4</sub> pH 8, 100 mM NaCl, 10 mM  
1002 Imidazole, 1X BugBuster (Merck), 25 U/ml Benzonase nuclease, 50 µg/ml TPCK, 50  
1003 µg/ml TLCK and 0.5 mM PMSF). His<sub>6</sub>-UBP6 was then purified using HisPur cobalt  
1004 resin (Thermo Fisher) according to manufacturers' instructions. Purified His<sub>6</sub>-V5-  
1005 S5aUIM was dialysed against 1X PBS and covalently coupled to NHS-activated  
1006 agarose to a final concentration of approximately 10 µg/µl following the manufacturer's  
1007 instructions (Thermo Fisher).

1008       N-terminal His<sub>6</sub>-T7-tagged UB6 was generated by cloning the coding  
1009 sequence of *Arabidopsis UB6* in to the expression vector pET28a using EcoRI and  
1010 Sall restriction sites. Primers used are listed in Table S2. Expression was induced in  
1011 BL21(DE3) *E. coli* cells with the addition of 1 mM IPTG and cultures were incubated  
1012 for a further 3 hrs at 28°C before collecting by centrifugation. Cells were then lysed in  
1013 lysis buffer (50 mM KHPO<sub>4</sub> pH 8, 300 mM NaCl, 10 mM Imidazole, 1 mg/ml lysozyme,  
1014 25 U/ml Benzonase nuclease, 0.1% Triton-X- 100, 10 mM β-mercaptoethanol, 50  
1015 µg/ml TPCK, 50 µg/ml TLCK and 0.5 mM PMSF). His<sub>6</sub>-UBP6 was then purified using

1016 HisPur cobalt resin (Thermo Fisher) according to manufacturers' instructions. Purified  
1017 His<sub>6</sub>-UBP6 was dialysed against 50 mM Tris-HCl pH 7.4, 5M NaCl and stored with the  
1018 addition of 10% glycerol at -80°C until use.

1019 The anti-NPR1 polyclonal antibody was generated by immunising rabbits with  
1020 a synthetic peptide based on a region of the NPR1 protein with the sequence N'-  
1021 SALAAAKKEKDSNNTAAVKL-Cys. Rabbits were subsequently bled and antibodies  
1022 were enriched by affinity purification (Proteintech, USA).

1023

#### 1024 **HA-UbVS labelling and *in vitro* deubiquitination assays**

1025 For HA-UbVS labelling, 10 µl reactions were prepared in 50 mM Tris-Hcl pH  
1026 7.4, 5 mM MgCl<sub>2</sub>, 1 mM DTT and 1 mM ATP. Before labelling, 350 nM His<sub>6</sub>-T7-UBP6  
1027 was pre-incubated with 50 µM WP1130 or DMSO control for 10 mins before addition  
1028 of 10 nM Ub-VS treated 26S proteasomes (Ubiquigent). Reactions were incubated for  
1029 a further 20 mins before addition of 700 nM HA-UbVS and further incubation for 30  
1030 mins. All steps were carried out at room temperature. Labelling was terminated with  
1031 the addition of SDS-PAGE sample buffer including 50 mM DTT. Samples were heated  
1032 at 70°C for 10 mins before SDS-PAGE and immunoblot analyses.

1033 All *in vitro* deubiquitination assays were performed in DUB buffer (50 mM Tris-  
1034 HCl pH 7.4, 5 mM MgCl<sub>2</sub>, 1 mM DTT, 5 mM ATP). Where indicated, 1.25 nM Ub-VS  
1035 treated 26S proteasomes and 20 nM UBP6 were added. Di-ubiquitin and polyubiquitin  
1036 chain substrates were included at 400 nM. Reactions were incubated at 30°C for the  
1037 times indicated in figure legends before terminating with addition of SDS-PAGE sample  
1038 buffer including 50 mM DTT. Samples were heated at 70°C for 10 mins before SDS-  
1039 PAGE and immunoblot analyses.

1040 For *in vitro* deubiquitination of NPR1-GFP isolated from plants, seedlings were  
1041 treated with SA and MG132 as described in figure legends. Seedlings were frozen and  
1042 ground to a fine powder in liquid nitrogen before homogenising in protein extraction  
1043 buffer (PEB) (50 mM Tris-HCl (pH 7.5), 150 mM NaCl, 5 mM EDTA, 0.1% Triton X-  
1044 100, 0.2% Nonidet P-40, and inhibitors: 50 µg/ml TPCK, 50 µg/ml TLCK, 0.6 mM  
1045 PMSF). Extracts were centrifuged at 13,000 rpm at 4°C for 20 mins to remove cellular  
1046 debris and filtered through 0.22 µm filters. GFP-Trap A agarose (Chromotek) was  
1047 incubated with extracts for 2h with rotation at 4°C before washing 10 times with PEB  
1048 (without inhibitors) then twice with DUB buffer. Supernatant was completely removed  
1049 before DUB reactions were set up as described above but with NPR1-GFP immobilised  
1050 on GFP-Trap A as the substrate. Proteins were eluted by boiling in 1X SDS-PAGE  
1051 sample buffer including 50 mM DTT, before analysis by immunoblotting.

1052

### 1053 **Quantification and statistical analyses**

1054 No statistical methods were used to predetermine sample sizes, nor were any methods  
1055 of randomization. All experiments were repeated a minimum of two times with similar  
1056 results. In all figure legends, the statistical tests applied are stated while *n* refers to  
1057 sample size.

1058
