# Supplementary material for: Dynamic ubiquitination determines transcriptional activity of the plant immune coactivator NPR1
Source: bioRxiv preprint, doi:10.1101/582296, version 1 (2019-03-20)
Supplement: Table S1 [file 582296_file03.xlsx]

## Sheet: Legend
Legend to columns
Column	Name	Description
A	Gene ID	AGI number of Arabidopsis thaliana gene.
B, E, H,K	FC ([sample 1] vs [sample 2])	Absolute fold change of sample 1 versus sample 2.
C, F, I, L	Log FC ([sample 1] vs [sample 2])	Log fold change of sample 1 versus sample 2.
D, G, J, M	Regulation ([sample 1 vs [sample 2])	Indicates if the gene is upregulated or downregulated in [sample 1] compared to [sample 2].
N	Gene Symbol	Abbreviated gene symbol
O	Description 1	Description of gene/protein function derived from EMBL
P	Description 2	Description of gene/protein function derived from TAIR & Araport
Notes:
Benjamini-Hochberg FDR, 2-way ANOVA p(Corr) (Treatment) cut-off = 0.05 (n = 2).
SA-dependent genes were selected by applying a fold change >=2 cut-off.
NPR1-dependent genes were selected by applying a fold change >=1.5 cut-off.
Condition pairs:
#[Col-0-SA] vs [Col-0-Ctrl]
#[ube4-SA] vs [ube4-Ctrl]
#[Col-0-SA] vs [npr1-SA]
#[ube4-SA] vs [npr1-SA]

## Sheet: RNA-Seq expression data
Gene ID	FC ([Col-0-SA] vs [Col-0-Ctrl])	Log FC ([Col-0-SA] vs [Col-0-Ctrl])	Regulation ([Col-0-SA] vs [Col-0-Ctrl])	FC ([ube4-SA] vs [ube4-Ctrl])	Log FC ([ube4-SA] vs [ube4-Ctrl])	Regulation ([ube4-SA] vs [ube4-Ctrl])	FC ([Col-0-SA] vs [npr1-1-SA])	Log FC ([Col-0-SA] vs [npr1-1-SA])	Regulation ([Col-0-SA] vs [npr1-1-SA])	FC ([ube4-SA] vs [npr1-1-SA])	Log FC ([ube4-SA] vs [npr1-1-SA])	Regulation ([ube4-SA] vs [npr1-1-SA])	Gene Symbol	Description 1	Description 2
AT2G14610	1685.83	10.7192	up	4373.04	12.0944	up	7527.42	12.8779	up	31778.3	14.9558	up	PR1	pathogenesis-related protein 1 [Source:EMBL;Acc:AEC06314.1]	AT2G14610 AT2G14610.1 PR1 gene expression is induced in response to a variety of pathogens. It is a useful molecular marker for the SAR response. Though the Genbank record for the cDNA associated to this gene is called 'PR-1-like', the sequence actually corresponds to PR1. Expression of this gene is salicylic-acid responsive. protein_coding PATHOGENESIS-RELATED GENE 1 (PR1) PATHOGENESIS-RELATED G…
AT1G14880	1289.56	10.3327	up	3207.51	11.6472	up	14432.8	13.8171	up	34943.9	15.0928	up	PCR1	cadmium resistance protein 1 [Source:EMBL;Acc:AEE29238.1]	AT1G14880 AT1G14880.1 PLANT CADMIUM RESISTANCE 1;(source:Araport11) protein_coding PLANT CADMIUM RESISTANCE 1 (PCR1) (AtPCR1);PLANT CADMIUM RESISTANCE 1 (PCR1)
AT1G15610	155.863	7.28414	up	263.443	8.04135	up	347.495	8.44085	up	335.604	8.39061	up	AT1G15610	uncharacterized protein [Source:EMBL;Acc:AEE29342.1]	AT1G15610 AT1G15610.1 transmembrane protein;(source:Araport11) protein_coding
AT1G13470	21.8331	4.44844	up	187.243	7.54877	up	256.307	8.00173	up	196.314	7.61702	up	AT1G13470	uncharacterized protein [Source:EMBL;Acc:AEE29023.1]	AT1G13470 AT1G13470.1 hypothetical protein (DUF1262);(source:Araport11) protein_coding
AT2G28850	63.1662	5.98108	up	147.613	7.20568	up	37.9361	5.2455	up	36.2875	5.1814	up	CYP710A3	cytochrome P450, family 710, subfamily A [Source:EMBL;Acc:AEC08181.1]	AT2G28850 AT2G28850.1 member of CYP710A protein_coding CYTOCHROME P450, FAMILY 710, SUBFAMILY A, POLYPEPTIDE 3 (CYP710A3) CYTOCHROME P450, FAMILY 710, SUBFAMILY A, POLYPEPTIDE 3 (CYP710A3)
AT3G28510	165.117	7.36734	up	139.047	7.11943	up	52.5523	5.71568	up	87.7959	6.45608	up	AT3G28510	AAA-type ATPase family protein [Source:EMBL;Acc:AEE77454.1]	AT3G28510 AT3G28510.1 P-loop containing nucleoside triphosphate hydrolases superfamily protein;(source:Araport11) protein_coding
AT2G26400	64.3382	6.0076	up	124.182	6.95631	up	154.15	7.26819	up	418.598	8.70942	up	ARD	1,2-dihydroxy-3-keto-5-methylthiopentene dioxygenase 1 [Source:EMBL;Acc:AEC07833.1]	AT2G26400 AT2G26400.1 Encodes a protein predicted to belong to the acireductone dioxygenase (ARD/ARD?)family. protein_coding ACIREDUCTONE DIOXYGENASE 3 (ARD3) ACIREDUCTONE DIOXYGENASE 3 (ARD3);ACIREDUCTONE DIOXYGENASE 3 (ATARD3);ACIREDUCTONE DIOXYGENASE (ARD)
AT5G45180	54.9282	5.77947	up	123.669	6.95034	up	49.9739	5.6431	up	87.4104	6.44973	up	AT5G45180	putative flavin-containing monooxygenase 2 [Source:EMBL;Acc:AED95213.1]	AT5G45180 AT5G45180.1 Flavin-binding monooxygenase family protein;(source:Araport11) protein_coding
AT4G39838	26.3525	4.71987	up	122.128	6.93226	up	-23.0175	-4.52466	down	-1.37548	-0.459933	down	AT4G39838	Potential natural antisense gene, locus overlaps with AT4G39840.[Source:TAIR;Acc:AT4G39838]	AT4G39838 AT4G39838.1 Potential natural antisense gene, locus overlaps with AT4G39840 antisense_long_noncoding_rna
AT2G21900	185.067	7.53191	up	112.466	6.81335	up	43.3435	5.43774	up	56.5102	5.82044	up	WRKY59	putative WRKY transcription factor 59 [Source:EMBL;Acc:AEC07236.1]	AT2G21900 AT2G21900.1 member of WRKY Transcription Factor; Group II-c protein_coding WRKY DNA-BINDING PROTEIN 59 (WRKY59) WRKY DNA-BINDING PROTEIN 59 (WRKY59); (AtWRKY59)
AT5G52710	60.8747	5.92777	up	111.86	6.80555	up	113.959	6.83237	up	86.9575	6.44224	up	AT5G52710	copper transport family protein [Source:EMBL;Acc:AED96252.1]	AT5G52710 AT5G52710.1 Copper transport protein family;(source:Araport11) protein_coding
AT4G37409	307.2	8.26303	up	107.926	6.7539	up	23.3701	4.54659	up	9.43986	3.23876	up	AT4G37409	uncharacterized protein [Source:EMBL;Acc:AEE86789.1]	AT4G37409 AT4G37409.1 hypothetical protein;(source:Araport11) protein_coding
AT1G02450	69.7647	6.12443	up	107.379	6.74657	up	53.0316	5.72878	up	130.44	7.02724	up	NIMIN1	protein NIM1-interacting 1 [Source:EMBL;Acc:AEE27431.1]	AT1G02450 AT1G02450.1 NIMIN1 modulates PR gene expression according the following model: NPR1 forms a ternary complex with NIMIN1 and TGA factors upon SAR induction that binds to a positive regulatory cis-element of the PR-1 promoter, termed LS7. This leads to PR-1 gene induction. NIMIN1 decreases transcriptional activation, possibly through its EAR motif, which results in fine-tuning of PR-1 gen…
AT3G12230	103.985	6.70023	up	106.676	6.7371	up	295.368	8.20637	up	490.714	8.93874	up	scpl14	serine carboxypeptidase-like 14 [Source:EMBL;Acc:AEE75170.1]	AT3G12230 AT3G12230.1 serine carboxypeptidase-like 14;(source:Araport11) protein_coding SERINE CARBOXYPEPTIDASE-LIKE 14 (scpl14) SERINE CARBOXYPEPTIDASE-LIKE 14 (scpl14)
AT1G80580	43.0897	5.42927	up	95.5905	6.5788	up	61.0023	5.93079	up	115.774	6.85517	up	AT1G80580	ethylene-responsive transcription factor ERF084 [Source:EMBL;Acc:AEE36424.1]	AT1G80580 AT1G80580.1 encodes a member of the ERF (ethylene response factor) subfamily B-1 of ERF/AP2 transcription factor family. The protein contains one AP2 domain. There are 15 members in this subfamily including ATERF-3, ATERF-4, ATERF-7, and leafy petiole. protein_coding
AT1G52130	66.5432	6.05622	up	95.0824	6.57111	up	66.5155	6.05562	up	95.0427	6.5705	up	AT1G52130	mannose-binding lectin-like protein [Source:EMBL;Acc:AEE32758.1]	AT1G52130 AT1G52130.1 Mannose-binding lectin superfamily protein;(source:Araport11) protein_coding
AT5G01900	69.3308	6.11542	up	93.9339	6.55357	up	327.344	8.35467	up	601.636	9.23275	up	WRKY62	putative WRKY transcription factor 62 [Source:EMBL;Acc:AED90407.1]	AT5G01900 AT5G01900.1 member of WRKY Transcription Factor; Group III protein_coding WRKY DNA-BINDING PROTEIN 62 (WRKY62) ARABIDOPSIS THALIANA WRKY DNA-BINDING PROTEIN 62 (ATWRKY62);WRKY DNA-BINDING PROTEIN 62 (WRKY62)
AT3G17150	20.7331	4.37386	up	63.1613	5.98097	up	16.0752	4.00676	up	44.2292	5.46693	up	AT3G17150	plant invertase/pectin methylesterase inhibitor domain-containing protein [Source:EMBL;Acc:AEE75910.1]	AT3G17150 AT3G17150.1 Plant invertase/pectin methylesterase inhibitor superfamily protein;(source:Araport11) protein_coding
AT4G10860	13.072	3.70841	up	57.359	5.84195	up	8.77193	3.13289	up	40.75	5.34873	up	AT4G10860	uncharacterized protein [Source:EMBL;Acc:AEE82937.1]	AT4G10860 AT4G10860.1 hypothetical protein;(source:Araport11) protein_coding
AT5G03350	66.9394	6.06478	up	54.0103	5.75516	up	65.5657	6.03487	up	88.6914	6.47072	up	AT5G03350	lectin-like protein [Source:EMBL;Acc:AED90590.1]	AT5G03350 AT5G03350.1 Legume lectin family protein;(source:Araport11) protein_coding
AT3G46190	17.7315	4.14824	up	51.4777	5.68588	up	9.64669	3.27003	up	11.8858	3.57117	up	AT3G46190	TRAF-like family protein [Source:EMBL;Acc:AEE78126.1]	AT3G46190 AT3G46190.1 TRAF-like family protein;(source:Araport11) protein_coding
AT1G52120	164.616	7.36296	up	50.0712	5.64591	up	164.616	7.36296	up	78.1222	6.28766	up	AT1G52120	jacalin-like lectin domain-containing protein [Source:EMBL;Acc:AEE32757.1]	AT1G52120 AT1G52120.1 Mannose-binding lectin superfamily protein;(source:Araport11) protein_coding
AT1G15620	30.9863	4.95356	up	49.7579	5.63685	up	68.9023	6.10648	up	91.242	6.51163	up	AT1G15620	uncharacterized protein [Source:EMBL;Acc:AEE29343.1]	AT1G15620 AT1G15620.1 transmembrane protein;(source:Araport11) protein_coding
AT2G30660	26.8977	4.74941	up	48.4934	5.59972	up	39.8038	5.31484	up	61.4154	5.94053	up	AT2G30660	3-hydroxyisobutyryl-CoA hydrolase [Source:EMBL;Acc:AEC08424.1]	AT2G30660 AT2G30660.1 ATP-dependent caseinolytic (Clp) protease/crotonase family protein;(source:Araport11) protein_coding
AT1G80590	70.0747	6.13082	up	48.4358	5.598	up	82.3231	6.36322	up	178.276	7.47797	up	WRKY66	putative WRKY transcription factor 66 [Source:EMBL;Acc:AEE36425.1]	AT1G80590 AT1G80590.1 member of WRKY Transcription Factor; Group III protein_coding WRKY DNA-BINDING PROTEIN 66 (WRKY66) (AtWRKY66);WRKY DNA-BINDING PROTEIN 66 (WRKY66)
AT2G14620	10.4534	3.38591	up	40.1622	5.32777	up	8.68217	3.11806	up	47.0452	5.55598	up	XTH10	xyloglucan:xyloglucosyl transferase [Source:EMBL;Acc:AEC06315.1]	AT2G14620 AT2G14620.1 xyloglucan endotransglucosylase/hydrolase 10;(source:Araport11) protein_coding XYLOGLUCAN ENDOTRANSGLUCOSYLASE/HYDROLASE 10 (XTH10) XYLOGLUCAN ENDOTRANSGLUCOSYLASE/HYDROLASE 10 (XTH10)
AT5G54610	54.6992	5.77345	up	40.1223	5.32633	up	63.7212	5.9937	up	56.8128	5.82814	up	ANK	ankyrin repeat family protein [Source:EMBL;Acc:AED96518.1]	AT5G54610 AT5G54610.1 Induced in response to Salicylic acid. Belongs to the ankyrin repeat protein family. protein_coding ANKYRIN (ANK) BIAN DA 2 (BECOMING BIG IN CHINESE) (BDA1);ANKYRIN (ANK)
AT3G22235	47.2627	5.56263	up	39.9853	5.3214	up	90.2479	6.49582	up	155.295	7.27887	up	AT3G22235	uncharacterized protein [Source:EMBL;Acc:AEE76610.1]	AT3G22235 AT3G22235.1 cysteine-rich TM module stress tolerance protein;(source:Araport11) protein_coding
AT2G32160	34.0051	5.08768	up	39.8474	5.31641	up	39.2322	5.29397	up	47.4426	5.56811	up	AT2G32160	N2227-like domain-containing protein [Source:EMBL;Acc:AEC08641.1]	AT2G32160 AT2G32160.3 S-adenosyl-L-methionine-dependent methyltransferases superfamily protein;(source:Araport11) protein_coding
AT3G22231	56.9076	5.83055	up	35.1008	5.13343	up	219.061	7.77519	up	350.869	8.45479	up	PCC1	pathogen and circadian controlled 1 [Source:EMBL;Acc:AEE76608.1]	AT3G22231 AT3G22231.1 Encodes a member of a novel 6 member Arabidopsis gene family. Expression of PCC1 is regulated by the circadian clock and is upregulated in response to both virulent and avirulent strains of Pseudomonas syringae pv. tomato. protein_coding PATHOGEN AND CIRCADIAN CONTROLLED 1 (PCC1) PATHOGEN AND CIRCADIAN CONTROLLED 1 (PCC1)
AT2G14560	39.2619	5.29506	up	32.1093	5.00492	up	98.6175	6.62377	up	154.955	7.27571	up	LURP1	LURP1 protein [Source:EMBL;Acc:AEC06311.1]	AT2G14560 AT2G14560.1 Encodes LURP1, a member of the LURP cluster (late upregulated in response to Hyaloperonospora parasitica) which exhibits a pronounced upregulation after recognition of the pathogenic oomycte H. parasitica. LURP1 is required for full basal defense to H. parasitica and resistance to this pathogen mediated by the R-proteins RPP4 and RPP5. The mRNA is cell-to-cell mobile. protei…
AT5G22570	37.7009	5.23653	up	29.9499	4.90448	up	132.391	7.04866	up	237.265	7.89036	up	WRKY38	putative WRKY transcription factor 38 [Source:EMBL;Acc:AED93044.1]	AT5G22570 AT5G22570.1 member of WRKY Transcription Factor; Group III protein_coding WRKY DNA-BINDING PROTEIN 38 (WRKY38) ARABIDOPSIS THALIANA WRKY DNA-BINDING PROTEIN 38 (ATWRKY38);WRKY DNA-BINDING PROTEIN 38 (WRKY38)
AT1G65360	11.0609	3.4674	up	29.1113	4.86351	up	11.0609	3.4674	up	29.1113	4.86351	up	AGL23	protein agamous-like 23 [Source:EMBL;Acc:AEE34365.1]	AT1G65360 AT1G65360.1 Encodes AGL23, a Type I MADS-box gene that controls female gametophyte development and the biogenesis of organelles during embryo development. protein_coding AGAMOUS-LIKE 23 (AGL23) AGAMOUS-LIKE 23 (AGL23)
AT3G12220	30.6651	4.93853	up	28.4688	4.83131	up	101.059	6.65905	up	151.658	7.24468	up	scpl16	serine carboxypeptidase-like 16 [Source:EMBL;Acc:AEE75169.1]	AT3G12220 AT3G12220.1 serine carboxypeptidase-like 16;(source:Araport11) protein_coding SERINE CARBOXYPEPTIDASE-LIKE 16 (scpl16) SERINE CARBOXYPEPTIDASE-LIKE 16 (scpl16)
AT1G44010	19.4655	4.28285	up	28.4318	4.82944	up	19.4574	4.28224	up	30.0882	4.91113	up	AT1G44010	uncharacterized protein [Source:EMBL;Acc:AEE32012.1]	AT1G44010 AT1G44010.1 transmembrane protein;(source:Araport11) protein_coding
AT1G74140	8.52948	3.09246	up	26.8685	4.74784	up	6.96872	2.80089	up	25.5339	4.67434	up	AT1G74140	Rhomboid-related intramembrane serine protease family protein [Source:EMBL;Acc:AEE35556.1]	AT1G74140 AT1G74140.5 Rhomboid-related intramembrane serine protease family protein;(source:Araport11) protein_coding
AT2G24850	15.2783	3.93342	up	25.3328	4.66293	up	30.9784	4.95319	up	23.7502	4.56987	up	TAT3	tyrosine aminotransferase 3 [Source:EMBL;Acc:AEC07636.1]	AT2G24850 AT2G24850.1 Encodes a tyrosine aminotransferase that is responsive to treatment with jasmonic acid. protein_coding TYROSINE AMINOTRANSFERASE 3 (TAT3) TYROSINE AMINOTRANSFERASE (TAT);TYROSINE AMINOTRANSFERASE 3 (TAT3)
AT2G44400	7.80187	2.96382	up	24.5493	4.61761	up	37.1586	5.21562	up	58.4833	5.86995	up	AT2G44400	cysteine/histidine-rich C1 domain-containing protein [Source:EMBL;Acc:AEC10416.1]	AT2G44400 AT2G44400.1 Cysteine/Histidine-rich C1 domain family protein;(source:Araport11) protein_coding
AT5G26690	22.9005	4.51731	up	23.9294	4.58071	up	25.1187	4.65069	up	51.7974	5.69481	up	AT5G26690	heavy-metal-associated domain-containing protein [Source:EMBL;Acc:AED93575.1]	AT5G26690 AT5G26690.1 Heavy metal transport/detoxification superfamily protein;(source:Araport11) protein_coding
AT1G66960	7.98487	2.99727	up	23.298	4.54213	up	22.9222	4.51867	up	23.298	4.54213	up	AT1G66960	lupeol synthase 5 [Source:EMBL;Acc:AEE34578.1]	AT1G66960 AT1G66960.1 Terpenoid cyclases family protein;(source:Araport11) protein_coding (LUP5) (LUP5)
AT3G22234	27.9195	4.8032	up	21.2259	4.40775	up	27.9195	4.8032	up	22.4718	4.49005	up	AT3G22234		AT3G22234 AT3G22234.1 pseudogene of ribulose-bisphosphate carboxylases;(source:Araport11) pseudogene
AT3G22238	27.9195	4.8032	up	21.2259	4.40775	up	27.9195	4.8032	up	22.4718	4.49005	up	AT3G22238	pseudogene.[Source:TAIR;Acc:AT3G22238]	AT3G22238 AT3G22238.1 pseudogene of ribulose-bisphosphate carboxylases;(source:Araport11) pseudogene
AT3G12502	39.9459	5.31998	up	20.8989	4.38535	up	4.30719	2.10675	up	2.20044	1.13779	up	AT3G12502	other RNA.[Source:TAIR;Acc:AT3G12502]	AT3G12502 AT3G12502.1 Potential natural antisense gene, locus overlaps with AT3G12500 antisense_long_noncoding_rna
AT3G25882	10.1207	3.33923	up	20.497	4.35734	up	23.1676	4.53404	up	43.5553	5.44477	up	NIMIN-2	NIM1-interacting 2 protein [Source:EMBL;Acc:AEE77083.1]	AT3G25882 AT3G25882.1 encodes a kinase that physically interacts with NPR1/NIM1 protein_coding NIM1-INTERACTING 2 (NIMIN-2) NIM1-INTERACTING 2 (NIMIN-2)
AT1G24147	25.3639	4.66471	up	20.4109	4.35127	up	28.9745	4.85671	up	43.8529	5.4546	up	AT1G24147	uncharacterized protein [Source:EMBL;Acc:AEE30484.1]	AT1G24147 AT1G24147.1 transmembrane protein;(source:Araport11) protein_coding
AT4G14390	15.0113	3.90797	up	20.3044	4.34372	up	37.183	5.21657	up	32.1359	5.00612	up	AT4G14390	ankyrin repeat-containing protein [Source:EMBL;Acc:AEE83436.1]	AT4G14390 AT4G14390.1 Ankyrin repeat family protein;(source:Araport11) protein_coding
AT3G22240	16.2779	4.02484	up	20.2552	4.34022	up	8.03555	3.0064	up	14.5203	3.86	up	AT3G22240	uncharacterized protein [Source:EMBL;Acc:AEE76611.1]	AT3G22240 AT3G22240.1 cysteine-rich/transmembrane domain PCC1-like protein;(source:Araport11) protein_coding
AT5G22555	17.8065	4.15433	up	19.6148	4.29387	up	28.1842	4.81682	up	60.6355	5.92209	up	AT5G22555	uncharacterized protein [Source:EMBL;Acc:AED93042.1]	AT5G22555 AT5G22555.1 transmembrane protein;(source:Araport11) protein_coding
AT3G61185	8.30714	3.05435	up	18.186	4.18476	up	3.18679	1.6721	up	15.4331	3.94796	up	AT3G61185	Encodes a defensin-like (DEFL) family protein..[Source:TAIR;Acc:AT3G61185]	AT3G61185 AT3G61185.1 Encodes a defensin-like (DEFL) family protein. pseudogene
AT3G57460	11.6899	3.54719	up	17.7523	4.14993	up	13.4007	3.74423	up	17.2769	4.11077	up	AT3G57460	catalytic/ metal ion binding / metalloendopeptidase/ zinc ion binding protein [Source:EMBL;Acc:AEE79657.1]	AT3G57460 AT3G57460.1 catalytic/ metal ion binding / metalloendopeptidase/ zinc ion binding protein;(source:Araport11) protein_coding
AT3G49668	-1	0	down	17.6666	4.14295	up	-1	0	down	17.6666	4.14295	up	AT3G49668	other RNA.[Source:TAIR;Acc:AT3G49668]	AT3G49668 AT3G49668.1 Potential natural antisense gene, locus overlaps with AT3G49670 antisense_long_noncoding_rna
AT2G40750	16.3639	4.03244	up	17.4326	4.12372	up	28.3645	4.82602	up	46.537	5.54031	up	ATWRKY54	WRKY DNA-binding protein 54 [Source:EMBL;Acc:AEC09872.1]	AT2G40750 AT2G40750.1 member of WRKY Transcription Factor; Group III protein_coding WRKY DNA-BINDING PROTEIN 54 (WRKY54) WRKY DNA-BINDING PROTEIN 54 (WRKY54);WRKY DNA-BINDING PROTEIN 54 (ATWRKY54)
AT5G22545	9.67242	3.27388	up	17.4206	4.12273	up	21.5079	4.4268	up	54.0598	5.75648	up	AT5G22545	uncharacterized protein [Source:EMBL;Acc:AED93039.1]	AT5G22545 AT5G22545.1 hypothetical protein;(source:Araport11) protein_coding
AT2G25510	17.5821	4.13603	up	16.5011	4.04449	up	31.6945	4.98616	up	38.8627	5.28031	up	AT2G25510	uncharacterized protein [Source:EMBL;Acc:AEC07710.1]	AT2G25510 AT2G25510.1 transmembrane protein;(source:Araport11) protein_coding
AT5G64810	10.5721	3.40219	up	16.2543	4.02275	up	4.61161	2.20527	up	7.46244	2.89965	up	WRKY51	putative WRKY transcription factor 51 [Source:EMBL;Acc:AED97953.1]	AT5G64810 AT5G64810.1 member of WRKY Transcription Factor; Group II-c. Involved in jasmonic acid inducible defense responses. protein_coding WRKY DNA-BINDING PROTEIN 51 (WRKY51) WRKY DNA-BINDING PROTEIN 51 (WRKY51);ARABIDOPSIS THALIANA WRKY DNA-BINDING PROTEIN 51 (ATWRKY51)
AT3G61198	13.0805	3.70935	up	16.2482	4.02221	up	8.41701	3.07331	up	22.4	4.48543	up	AT3G61198	other RNA.[Source:TAIR;Acc:AT3G61198]	AT3G61198 AT3G61198.1 other_RNA;(source:Araport11) other_rna
AT4G10500	33.3362	5.05902	up	16.0243	4.00219	up	25.8325	4.69112	up	35.3861	5.14511	up	AT4G10500	oxidoreductase, 2OG-Fe(II) oxygenase family protein [Source:EMBL;Acc:AEE82891.1]	AT4G10500 AT4G10500.1 2-oxoglutarate (2OG) and Fe(II)-dependent oxygenase superfamily protein;(source:Araport11) protein_coding DMR6-LIKE OXYGENASE 1 (DLO1) DMR6-LIKE OXYGENASE 1 (DLO1)
AT5G41290	14.5061	3.85859	up	15.6157	3.96493	up	38.9492	5.28352	up	29.4394	4.87967	up	AT5G41290	cysteine-rich repeat secretory protein 58 [Source:EMBL;Acc:AED94661.1]	AT5G41290 AT5G41290.1 Receptor-like protein kinase-related family protein;(source:Araport11) protein_coding
AT1G29090	5.59063	2.48301	up	15.0599	3.91264	up	-1.10362	-0.142241	down	-1.6935	-0.760008	down	AT1G29090	cysteine proteinase-like protein [Source:EMBL;Acc:AEE31041.1]	AT1G29090 AT1G29090.1 Cysteine proteinases superfamily protein;(source:Araport11) protein_coding
AT1G15630	20.847	4.38177	up	14.8986	3.89711	up	133.819	7.06414	up	149.018	7.21935	up	AT1G15630	uncharacterized protein [Source:EMBL;Acc:AEE29344.1]	AT1G15630 AT1G15630.1 transmembrane protein;(source:Araport11) protein_coding
AT5G24205	8.64967	3.11264	up	14.8932	3.89658	up	12.4636	3.63965	up	19.5129	4.28636	up	AT5G24205	other RNA.[Source:TAIR;Acc:AT5G24205]	AT5G24205 AT5G24205.1 other_RNA;(source:Araport11) other_rna
AT5G49850	12.3161	3.62248	up	14.0202	3.80943	up	16.1306	4.01173	up	12.4615	3.6394	up	AT5G49850	jacalin lectin family protein [Source:EMBL;Acc:AED95864.1]	AT5G49850 AT5G49850.1 Mannose-binding lectin superfamily protein;(source:Araport11) protein_coding
AT1G28480	14.6123	3.86911	up	13.5617	3.76146	up	3.71242	1.89236	up	6.3291	2.662	up	GRX480	glutaredoxin-C9 [Source:EMBL;Acc:AEE30981.1]	AT1G28480 AT1G28480.1 Encodes GRX480, a member of the glutaredoxin family that regulates protein redox state. GRX480 interacts with TGA factors and suppresses JA-responsive PDF1.2 transcription. GRX480 transcription is SA-inducible and requires NPR1. Maybe involved in SA/JA cross-talk. protein_coding (GRX480) (GRX480); (GRXC9); (roxy19)
AT5G54700	11.3787	3.50826	up	13.4566	3.75024	up	8.04258	3.00766	up	12.6116	3.65668	up	AT5G54700	ankyrin repeat-containing protein [Source:EMBL;Acc:AED96528.1]	AT5G54700 AT5G54700.1 Ankyrin repeat family protein;(source:Araport11) protein_coding
AT5G52720	3.53952	1.82355	up	13.4423	3.74871	up	14.7069	3.87842	up	44.5677	5.47793	up	AT5G52720	copper transport family protein [Source:EMBL;Acc:AED96253.1]	AT5G52720 AT5G52720.1 Copper transport protein family;(source:Araport11) protein_coding
AT3G11385	10.8219	3.43588	up	13.2963	3.73295	up	205.985	7.6864	up	126.089	6.9783	up	AT3G11385	cysteine/histidine-rich C1 domain-containing protein [Source:EMBL;Acc:AEE75036.1]	AT3G11385 AT3G11385.1 Cysteine/Histidine-rich C1 domain family protein;(source:Araport11) protein_coding
AT4G13420	3.92143	1.97138	up	13.1994	3.7224	up	-4.24783	-2.08673	down	-6.25916	-2.64597	down	HAK5	Potassium transporter 5 [Source:EMBL;Acc:AEE83277.1]	AT4G13420 AT4G13420.1 Encodes a protein of the KUP/HAK/KT potassium channel class that is upregulated in the roots by K levels. protein_coding HIGH AFFINITY K+ TRANSPORTER 5 (HAK5) ARABIDOPSIS THALIANA HIGH AFFINITY K+ TRANSPORTER 5 (ATHAK5);HIGH AFFINITY K+ TRANSPORTER 5 (HAK5)
AT3G46186	5.48145	2.45456	up	13.122	3.71392	up	4.01429	2.00514	up	8.41637	3.0732	up	AT3G46186	pseudogene.[Source:TAIR;Acc:AT3G46186]	AT3G46186 AT3G46186.1 pseudogene of RNA-directed DNA polymerase (reverse transcriptase)-related family protein;(source:Araport11) pseudogene
AT2G02580	16.1087	4.00977	up	12.9319	3.69286	up	54.7382	5.77447	up	49.0433	5.61599	up	CYP71B9	cytochrome P450 71B9 [Source:EMBL;Acc:AEC05601.1]	AT2G02580 AT2G02580.1 member of CYP71B protein_coding "CYTOCHROME P450, FAMILY 71, SUBFAMILY B, POLYPEPTIDE 9" (CYP71B9) "CYTOCHROME P450, FAMILY 71, SUBFAMILY B, POLYPEPTIDE 9" (CYP71B9)
AT3G27070	19.6429	4.29594	up	12.7949	3.67749	up	16.7183	4.06335	up	25.0966	4.64942	up	TOM20-1	mitochondrial import receptor subunit TOM20-1 [Source:EMBL;Acc:AEE77263.1]	AT3G27070 AT3G27070.2 Form of TOM20, which is a component of the TOM complex, involved in transport of nuclear-encoded mitochondrial proteins protein_coding TRANSLOCASE OUTER MEMBRANE 20-1 (TOM20-1) TRANSLOCASE OUTER MEMBRANE 20-1 (TOM20-1)
AT3G11340	8.51015	3.08919	up	12.7467	3.67205	up	3.4417	1.78312	up	3.93839	1.97761	up	AT3G11340	UDP-glycosyltransferase-like protein [Source:EMBL;Acc:AEE75032.1]	AT3G11340 AT3G11340.1 Encodes a glucosyltransferase that conjugates isoleucic acid and modulates plant defense and senescence. protein_coding UDP-DEPENDENT GLYCOSYLTRANSFERASE 76B1 (UGT76B1) UDP-DEPENDENT GLYCOSYLTRANSFERASE 76B1 (UGT76B1)
AT5G55770	14.0004	3.8074	up	12.4823	3.64181	up	67.2524	6.07151	up	15.2446	3.93022	up	AT5G55770	cysteine/histidine-rich C1 domain-containing protein [Source:EMBL;Acc:AED96678.1]	AT5G55770 AT5G55770.1 Cysteine/Histidine-rich C1 domain family protein;(source:Araport11) protein_coding
AT3G28540	9.49217	3.24674	up	12.3746	3.62931	up	11.0784	3.46968	up	16.7069	4.06237	up	AT3G28540	AAA-type ATPase family protein [Source:EMBL;Acc:AEE77457.1]	AT3G28540 AT3G28540.1 P-loop containing nucleoside triphosphate hydrolases superfamily protein;(source:Araport11) protein_coding
AT2G22320	3.17341	1.66604	up	12.3741	3.62925	up	4.01424	2.00513	up	6.68034	2.73992	up	AT2G22320	uncharacterized protein [Source:EMBL;Acc:AEC07293.1]	AT2G22320 AT2G22320.1 hypothetical protein;(source:Araport11) protein_coding
AT2G45760	17.2375	4.10748	up	12.28	3.61824	up	18.4062	4.20212	up	23.0314	4.52553	up	BAP2	BON1-associated protein 2 [Source:EMBL;Acc:AEC10598.1]	AT2G45760 AT2G45760.1 encodes a protein that is similar to BONZAI1-binding protein BAP1. protein_coding BON ASSOCIATION PROTEIN 2 (BAP2) BON ASSOCIATION PROTEIN 1-LIKE (BAL);BON ASSOCIATION PROTEIN 2 (BAP2)
AT5G24206	9.16519	3.19617	up	12.2605	3.61595	up	11.8052	3.56135	up	13.1315	3.71496	up	AT5G24206	other RNA.[Source:TAIR;Acc:AT5G24206]	AT5G24206 AT5G24206.1 other_RNA;(source:Araport11) other_rna
AT5G11920	5.58598	2.48181	up	12.1955	3.60827	up	15.8718	3.98839	up	13.3535	3.73915	up	AtcwINV6	beta-fructofuranosidase, insoluble isoenzyme CWINV6 [Source:EMBL;Acc:AED91740.1]	AT5G11920 AT5G11920.1 Encodes a protein with fructan exohydrolase (FEH) activity acting on both inulin and levan-type fructans (1- and 6-FEH). The enzyme does not have invertase activity. protein_coding 6-&1-FRUCTAN EXOHYDROLASE (cwINV6) 6-&1-FRUCTAN EXOHYDROLASE (AtcwINV6);6-&1-FRUCTAN EXOHYDROLASE (cwINV6)
AT1G69720	6.13022	2.61594	up	12.1478	3.60263	up	14.4238	3.85038	up	18.3981	4.20149	up	HO3	heme oxygenase 3 [Source:EMBL;Acc:AEE34967.1]	AT1G69720 AT1G69720.1 Encodes a member (HO3) of the heme oxygenase family. protein_coding HEME OXYGENASE 3 (ho3) HEME OXYGENASE 3 (ho3)
AT4G04710	12.6696	3.6633	up	12.0352	3.58919	up	31.8928	4.99516	up	28.9025	4.85312	up	CPK22	calcium-dependent protein kinase 22 [Source:EMBL;Acc:AEE82415.1]	AT4G04710 AT4G04710.1 member of Calcium Dependent Protein Kinase protein_coding CALCIUM-DEPENDENT PROTEIN KINASE 22 (CPK22) CALCIUM-DEPENDENT PROTEIN KINASE 22 (CPK22)
AT5G09720	7.85251	2.97315	up	11.9188	3.57517	up	16.5398	4.04787	up	25.3111	4.6617	up	AT5G09720	magnesium transporter MRS2-8 [Source:EMBL;Acc:AED91438.1]	AT5G09720 AT5G09720.1 Magnesium transporter CorA-like family protein;(source:Araport11) protein_coding
AT4G05540	4.75988	2.25093	up	11.6307	3.53987	up	4.75988	2.25093	up	14.8166	3.88914	up	AT4G05540	DNA helicase domain-containing protein [Source:EMBL;Acc:AEE82533.1]	AT4G05540 AT4G05540.1 P-loop containing nucleoside triphosphate hydrolases superfamily protein;(source:Araport11) protein_coding
AT5G41280	13.2346	3.72624	up	11.5468	3.52942	up	56.8092	5.82805	up	45.2467	5.49974	up	AT5G41280	cysteine-rich repeat secretory protein 57 [Source:EMBL;Acc:AED94660.1]	AT5G41280 AT5G41280.1 Receptor-like protein kinase-related family protein;(source:Araport11) protein_coding
AT2G15780	4.82494	2.27051	up	11.0343	3.46392	up	1.48838	0.573744	up	6.55307	2.71217	up	AT2G15780	Plastocyanin-like domain-containing protein [Source:EMBL;Acc:AEC06437.1]	AT2G15780 AT2G15780.1 Cupredoxin superfamily protein;(source:Araport11) protein_coding
AT1G12940	3.8346	1.93907	up	10.8344	3.43755	up	2.27793	1.18772	up	-1.18784	-0.248343	down	ATNRT2.5	nitrate transporter2.5 [Source:EMBL;Acc:AEE28952.1]	AT1G12940 AT1G12940.1 member of High affinity nitrate transporter family protein_coding NITRATE TRANSPORTER2.5 (NRT2.5) NITRATE TRANSPORTER2.5 (NRT2.5);NITRATE TRANSPORTER2.5 (ATNRT2.5)
AT5G45000	5.27751	2.39986	up	10.7901	3.43164	up	15.1179	3.91818	up	19.2571	4.26732	up	AT5G45000	TIR-NBS-LRR class disease resistance protein [Source:EMBL;Acc:AED95187.1]	AT5G45000 AT5G45000.1 Disease resistance protein (TIR-NBS-LRR class) family;(source:Araport11) protein_coding
AT5G24530	8.2482	3.04408	up	10.6344	3.41067	up	5.09842	2.35005	up	5.96018	2.57536	up	DMR6	downy mildew resistance 6 protein / oxidoreductase [Source:EMBL;Acc:AED93322.1]	AT5G24530 AT5G24530.1 Encodes a putative 2OG-Fe(II) oxygenase that is defense-associated but required for susceptibility to downy mildew. The mRNA is cell-to-cell mobile. protein_coding DOWNY MILDEW RESISTANT 6 (DMR6) (ATDMR6);DOWNY MILDEW RESISTANT 6 (DMR6)
AT2G38690	3.49277	1.80437	up	10.4769	3.38914	up	2.32388	1.21654	up	3.83936	1.94087	up	AT2G38690	uncharacterized protein [Source:EMBL;Acc:AEC09570.1]	AT2G38690 AT2G38690.1 gem-associated-like protein;(source:Araport11) protein_coding
AT1G72000	2.98405	1.57727	up	10.2268	3.35428	up	4.97941	2.31597	up	5.04096	2.3337	up	AT1G72000	putative invertase [Source:EMBL;Acc:AEE35262.1]	AT1G72000 AT1G72000.1 Plant neutral invertase family protein;(source:Araport11) protein_coding ALKALINE/NEUTRAL INVERTASE F (A/N-InvF) ALKALINE/NEUTRAL INVERTASE F (A/N-InvF)
AT1G24320	8.08948	3.01605	up	10.0969	3.33584	up	15.7622	3.9784	up	18.1342	4.18064	up	AT1G24320	mannosyl-oligosaccharide glucosidase [Source:EMBL;Acc:AEE30516.1]	AT1G24320 AT1G24320.1 Six-hairpin glycosidases superfamily protein;(source:Araport11) protein_coding
AT3G57240	11.008	3.46047	up	9.8399	3.29864	up	22.6614	4.50217	up	25.5169	4.67338	up	BG3	beta-1,3-glucanase 3 [Source:EMBL;Acc:AEE79631.1]	AT3G57240 AT3G57240.1 encodes a member of glycosyl hydrolase family 17 protein_coding BETA-1,3-GLUCANASE 3 (BG3) (ATBG3);BETA-1,3-GLUCANASE 3 (BG3)
AT3G44860	9.65454	3.27121	up	9.72404	3.28156	up	9.41328	3.2347	up	2.7536	1.46132	up	FAMT	farnesoic acid carboxyl-O-methyltransferase [Source:EMBL;Acc:AEE77962.1]	AT3G44860 AT3G44860.1 Encodes a farnesoic acid carboxyl-O-methyltransferase. The mRNA is cell-to-cell mobile. protein_coding FARNESOIC ACID CARBOXYL-O-METHYLTRANSFERASE (FAMT) FARNESOIC ACID CARBOXYL-O-METHYLTRANSFERASE (FAMT)
AT3G53150	4.57726	2.19449	up	9.71331	3.27996	up	2.92716	1.5495	up	2.8448	1.50832	up	UGT73D1	UDP-glucosyl transferase 73D1 [Source:EMBL;Acc:AEE79042.1]	AT3G53150 AT3G53150.1 UDP-glucosyl transferase 73D1;(source:Araport11) protein_coding UDP-GLUCOSYL TRANSFERASE 73D1 (UGT73D1) UDP-GLUCOSYL TRANSFERASE 73D1 (UGT73D1)
AT2G28860	16.1676	4.01503	up	9.63734	3.26863	up	16.1608	4.01443	up	9.63332	3.26803	up	CYP710A4	cytochrome P450, family 710, subfamily A [Source:EMBL;Acc:AEC08182.1]	AT2G28860 AT2G28860.1 member of CYP710A protein_coding CYTOCHROME P450, FAMILY 710, SUBFAMILY A, POLYPEPTIDE 4 (CYP710A4) CYTOCHROME P450, FAMILY 710, SUBFAMILY A, POLYPEPTIDE 4 (CYP710A4)
AT5G09290	8.26806	3.04755	up	9.58952	3.26146	up	7.92558	2.98652	up	10.9024	3.44657	up	AT5G09290	putative SAL4 phosphatase [Source:EMBL;Acc:AED91370.1]	AT5G09290 AT5G09290.1 Inositol monophosphatase family protein;(source:Araport11) protein_coding
AT5G64530	2.82271	1.49708	up	9.48596	3.24579	up	1.91304	0.935867	up	3.77916	1.91807	up	ANAC104	xylem NAC domain 1 [Source:EMBL;Acc:AED97913.1]	AT5G64530 AT5G64530.1 xylem NAC domain 1;(source:Araport11) protein_coding XYLEM NAC DOMAIN 1 (XND1) XYLEM NAC DOMAIN 1 (XND1);ARABIDOPSIS NAC DOMAIN CONTAINING PROTEIN 104 (ANAC104)
AT4G35180	6.95729	2.79853	up	9.23651	3.20735	up	3.04339	1.60568	up	3.19201	1.67446	up	LHT7	LYS/HIS transporter 7 [Source:EMBL;Acc:AEE86477.1]	AT4G35180 AT4G35180.1 LYS/HIS transporter 7;(source:Araport11) protein_coding LYS/HIS TRANSPORTER 7 (LHT7) LYS/HIS TRANSPORTER 7 (LHT7)
AT3G23120	7.09361	2.82652	up	9.15946	3.19526	up	9.46188	3.24213	up	5.82263	2.54167	up	RLP38	receptor like protein 38 [Source:EMBL;Acc:AEE76720.1]	AT3G23120 AT3G23120.1 receptor like protein 38;(source:Araport11) protein_coding RECEPTOR LIKE PROTEIN 38 (RLP38) RECEPTOR LIKE PROTEIN 38 (RLP38);RECEPTOR LIKE PROTEIN 38 (AtRLP38)
AT3G01080	7.85817	2.97419	up	9.06277	3.17995	up	4.29515	2.10271	up	4.22941	2.08046	up	WRKY58	WRKY DNA-binding protein 58 [Source:EMBL;Acc:AEE73605.1]	AT3G01080 AT3G01080.1 member of WRKY Transcription Factor; Group I protein_coding WRKY DNA-BINDING PROTEIN 58 (WRKY58) WRKY DNA-BINDING PROTEIN 58 (WRKY58);WRKY DNA-BINDING PROTEIN 58 (ATWRKY58)
AT3G51360	5.39894	2.43268	up	8.99849	3.16968	up	5.67185	2.50382	up	6.35902	2.6688	up	AT3G51360	aspartyl protease family protein [Source:EMBL;Acc:AEE78783.1]	AT3G51360 AT3G51360.1 Eukaryotic aspartyl protease family protein;(source:Araport11) protein_coding
AT1G53540	16.7511	4.06618	up	8.97554	3.166	up	-1.08998	-0.1243	down	-1.63759	-0.711572	down	AT1G53540	HSP20-like chaperone [Source:EMBL;Acc:AEE32954.1]	AT1G53540 AT1G53540.1 HSP20-like chaperones superfamily protein;(source:Araport11) protein_coding
AT4G14400	10.5179	3.39477	up	8.96896	3.16494	up	12.9661	3.69668	up	7.70961	2.94666	up	ACD6	ankyrin repeat-containing protein [Source:EMBL;Acc:AEE83438.1]	AT4G14400 AT4G14400.1 encodes a novel protein with putative ankyrin and transmembrane regions. It is a member of one of the largest uncharacterized gene families in higher plants. The gene is involved in resistance to Pseudomonas syringae. protein_coding ACCELERATED CELL DEATH 6 (ACD6) ACCELERATED CELL DEATH 6 (ACD6)
AT1G66600	4.42269	2.14492	up	8.94397	3.16092	up	1.21064	0.275767	up	1.59514	0.673686	up	WRKY63	putative WRKY transcription factor 63 [Source:EMBL;Acc:AEE34534.1]	AT1G66600 AT1G66600.1 A member of WRKY Transcription Factor; Group III. Involved in the regulation of plant responses to ABA and drought stress. protein_coding ABA OVERLY SENSITIVE MUTANT 3 (ABO3) WRKY DNA-BINDING PROTEIN 63 (WRKY63); (ABO3);ABA OVERLY SENSITIVE MUTANT 3 (ABO3); (AtWRKY63)
AT1G02230	5.18691	2.37487	up	8.87087	3.14908	up	-1.28058	-0.356802	down	-1.08508	-0.117798	down	ANAC004	NAC domain-containing protein 4 [Source:EMBL;Acc:AEE27405.1]	AT1G02230 AT1G02230.1 NAC domain containing protein 4;(source:Araport11) protein_coding NAC DOMAIN CONTAINING PROTEIN 4 (NAC004) NAC DOMAIN CONTAINING PROTEIN 4 (NAC004);NAC DOMAIN CONTAINING PROTEIN 4 (ANAC004)
AT4G19720	8.23789	3.04227	up	8.85858	3.14708	up	13.7879	3.78533	up	10.7747	3.42958	up	AT4G19720	Glycosyl hydrolase family protein with chitinase insertion domain [Source:EMBL;Acc:AEE84221.1]	AT4G19720 AT4G19720.1 Glycosyl hydrolase family protein with chitinase insertion domain-containing protein;(source:Araport11) protein_coding
AT5G44568	4.66906	2.22313	up	8.82863	3.14219	up	10.4251	3.38198	up	17.2566	4.10907	up	AT5G44568	uncharacterized protein [Source:EMBL;Acc:AED95126.1]	AT5G44568 AT5G44568.1 transmembrane protein;(source:Araport11) protein_coding
AT2G30550	6.28564	2.65206	up	8.76158	3.13119	up	3.27103	1.70975	up	3.88587	1.95824	up	AT2G30550	phospholipase A1-Igamma2 [Source:EMBL;Acc:AEC08406.1]	AT2G30550 AT2G30550.2 Encodes a lipase that hydrolyzes phosphatidylcholine, glycolipids as well as triacylglycerols. protein_coding DAD1-LIKE LIPASE 3 (DALL3) DAD1-LIKE LIPASE 3 (DALL3)
AT4G18870	2.0895	1.06316	up	8.73414	3.12667	up	-1.71075	-0.774626	down	2.10564	1.07426	up	AT4G18870	E2F/DP family winged-helix DNA-binding domain-containing protein [Source:EMBL;Acc:AEE84100.1]	AT4G18870 AT4G18870.1 E2F/DP family winged-helix DNA-binding domain-containing protein;(source:Araport11) protein_coding
AT2G44390	7.83115	2.96922	up	8.72391	3.12498	up	9.33375	3.22246	up	13.3525	3.73904	up	AT2G44390	cysteine/histidine-rich C1 domain-containing protein [Source:EMBL;Acc:AEC10415.1]	AT2G44390 AT2G44390.1 Cysteine/Histidine-rich C1 domain family protein;(source:Araport11) protein_coding
AT5G22560	4.70229	2.23336	up	8.57015	3.09932	up	14.196	3.82742	up	13.5902	3.7645	up	AT5G22560	uncharacterized protein [Source:EMBL;Acc:AED93043.1]	AT5G22560 AT5G22560.1 transmembrane protein, putative (DUF247);(source:Araport11) protein_coding
AT5G42530	8.39461	3.06946	up	8.43224	3.07592	up	9.97957	3.31898	up	12.2642	3.61638	up	AT5G42530	uncharacterized protein [Source:EMBL;Acc:AED94823.1]	AT5G42530 AT5G42530.1 hypothetical protein;(source:Araport11) protein_coding
AT3G46480	11.423	3.51386	up	8.43056	3.07563	up	6.0687	2.60139	up	7.15733	2.83942	up	AT3G46480	iron ion binding / oxidoreductase/ oxidoreductase protein [Source:EMBL;Acc:AEE78164.1]	AT3G46480 AT3G46480.1 2-oxoglutarate (2OG) and Fe(II)-dependent oxygenase superfamily protein;(source:Araport11) protein_coding
AT1G11925	5.82573	2.54244	up	8.33238	3.05873	up	1.12838	0.174247	up	1.73731	0.796853	up	AT1G11925	stigma-specific stig1-like protein [Source:EMBL;Acc:AEE28816.1]	AT1G11925 AT1G11925.1 Encodes a Stigma-specific Stig1 family protein protein_coding
AT3G61280	10.9828	3.45717	up	8.30158	3.05339	up	8.6939	3.12	up	7.5525	2.91695	up	AT3G61280	uncharacterized protein [Source:EMBL;Acc:AEE80183.1]	AT3G61280 AT3G61280.1 O-glucosyltransferase rumi-like protein (DUF821);(source:Araport11) protein_coding
AT1G31570	3.15965	1.65976	up	8.29181	3.05169	up	4.06708	2.02399	up	8.29181	3.05169	up	AT1G31570	transposable element gene.[Source:TAIR;Acc:AT1G31570]	AT1G31570 AT1G31570.1 transposable_element_gene;(source:Araport11);CACTA-like transposase family (Tnp2/En/Spm), has a 0. P-value blast match to gb|AAG52024.1|AC022456_5 Tam1-homologous transposon protein TNP2, putative;(source:TAIR10) transposable_element_gene
AT5G39130	5.69419	2.50949	up	8.17945	3.032	up	6.65748	2.73498	up	10.2061	3.35137	up	AT5G39130	germin-like protein subfamily 1 member 16 [Source:EMBL;Acc:AED94397.1]	AT5G39130 AT5G39130.1 RmlC-like cupins superfamily protein;(source:Araport11) protein_coding
AT3G15536	3.42125	1.77452	up	8.00888	3.0016	up	1.97444	0.981441	up	4.622	2.20852	up	AT3G15536	Unknown gene.[Source:TAIR;Acc:AT3G15536]	AT3G15536 AT3G15536.1 Unknown gene The mRNA is cell-to-cell mobile. other_rna
AT1G33840	6.15886	2.62266	up	7.97091	2.99474	up	32.7792	5.03471	up	55.8059	5.80235	up	AT1G33840	uncharacterized protein [Source:EMBL;Acc:AEE31631.1]	AT1G33840 AT1G33840.1 LURP-one-like protein (DUF567);(source:Araport11) protein_coding
AT5G55420	13.0235	3.70304	up	7.93505	2.98824	up	13.0235	3.70304	up	7.93505	2.98824	up	AT5G55420	Encodes a Protease inhibitor/seed storage/LTP family protein [pseudogene].[Source:TAIR;Acc:AT5G55420]	AT5G55420 AT5G55420.1 Encodes a Protease inhibitor/seed storage/LTP family protein [pseudogene] pseudogene
AT3G13950	4.09621	2.03429	up	7.92003	2.98551	up	2.41036	1.26925	up	3.03295	1.60072	up	AT3G13950	uncharacterized protein [Source:EMBL;Acc:AEE75444.1]	AT3G13950 AT3G13950.1 ankyrin;(source:Araport11) protein_coding
AT3G48080	10.1589	3.34468	up	7.88952	2.97994	up	12.829	3.68133	up	13.9199	3.79908	up	AT3G48080	lipase class 3 family protein / disease resistance protein-related protein [Source:EMBL;Acc:AEE78365.1]	AT3G48080 AT3G48080.1 alpha/beta-Hydrolases superfamily protein;(source:Araport11) protein_coding
AT3G56400	9.995	3.32121	up	7.85517	2.97364	up	5.13621	2.3607	up	9.39204	3.23144	up	WRKY70	putative WRKY transcription factor 70 [Source:EMBL;Acc:AEE79517.1]	AT3G56400 AT3G56400.1 member of WRKY Transcription Factor; Group III. Function as activator of SA-dependent defense genes and a repressor of JA-regulated genes. WRKY70-controlled suppression of JA-signaling is partly executed by NPR1. protein_coding WRKY DNA-BINDING PROTEIN 70 (WRKY70) ARABIDOPSIS THALIANA WRKY DNA-BINDING PROTEIN 70 (ATWRKY70);WRKY DNA-BINDING PROTEIN 70 (WRKY70)
AT3G07600	13.5499	3.76021	up	7.80132	2.96372	up	7.53617	2.91383	up	6.90827	2.78833	up	AT3G07600	heavy-metal-associated domain-containing protein [Source:EMBL;Acc:AEE74572.1]	AT3G07600 AT3G07600.1 Heavy metal transport/detoxification superfamily protein;(source:Araport11) protein_coding
AT1G26290	2.47093	1.30505	up	7.79396	2.96236	up	1.71337	0.77684	up	2.98572	1.57808	up	AT1G26290	uncharacterized protein [Source:EMBL;Acc:AEE30673.1]	AT1G26290 AT1G26290.1 hypothetical protein;(source:Araport11) protein_coding
AT5G64890	2.99979	1.58486	up	7.79309	2.9622	up	6.67379	2.73851	up	13.4194	3.74625	up	PROPEP2	elicitor peptide 2 [Source:EMBL;Acc:AED97965.1]	AT5G64890 AT5G64890.1 elicitor peptide 2 precursor;(source:Araport11) protein_coding ELICITOR PEPTIDE 2 PRECURSOR (PROPEP2) ELICITOR PEPTIDE 2 PRECURSOR (PROPEP2)
AT1G03850	5.38389	2.42865	up	7.77677	2.95917	up	1.6395	0.713257	up	4.42058	2.14424	up	AT1G03850	monothiol glutaredoxin-S13 [Source:EMBL;Acc:AEE27623.1]	AT1G03850 AT1G03850.1 Encodes glutaredoxin ATGRXS13, required to facilitate Botrytis cinerea infection of Arabidopsis thaliana plants. Sylvain La Camera et al (2011, PMID:21756272) reported a third splice variant in addition to the two annotated in TAIR10. protein_coding GLUTAREDOXIN 13 (GRXS13) GLUTAREDOXIN 13 (ATGRXS13);GLUTAREDOXIN 13 (GRXS13)
AT3G13090	6.2156	2.63589	up	7.74975	2.95415	up	3.90077	1.96376	up	3.01345	1.59142	up	ATMRP8	multidrug resistance-associated protein 8 [Source:EMBL;Acc:AEE75295.1]	AT3G13090 AT3G13090.1 member of MRP subfamily protein_coding ATP-BINDING CASSETTE C6 (ABCC6) MULTIDRUG RESISTANCE-ASSOCIATED PROTEIN 8 (ATMRP8);ATP-BINDING CASSETTE C6 (ABCC6);MULTIDRUG RESISTANCE-ASSOCIATED PROTEIN 8 (MRP8)
AT1G17480	3.54491	1.82575	up	7.67429	2.94003	up	4.60999	2.20476	up	13.8134	3.78799	up	IQD7	protein IQ-domain 7 [Source:EMBL;Acc:AEE29597.1]	AT1G17480 AT1G17480.1 Transient expression of Pro35S:GFP-IQD7 in leaves of N. benthamiana alters microtubule organization, in patterns similar to Pro35S:GFP-IQD8 and Pro35S:GFP-IQD6. protein_coding IQ-DOMAIN 7 (IQD7) IQ-DOMAIN 7 (IQD7)
AT1G19960	8.60803	3.10568	up	7.66992	2.93921	up	8.15511	3.0277	up	21.2687	4.41066	up	AT1G19960	uncharacterized protein [Source:EMBL;Acc:AEE29917.1]	AT1G19960 AT1G19960.1 transcription factor;(source:Araport11) protein_coding
AT1G68380	1.01657	0.0237114	up	7.61219	2.92831	up	-5.29357	-2.40424	down	1.41457	0.50036	up	AT1G68380	Core-2/I-branching beta-1,6-N-acetylglucosaminyltransferase family protein [Source:EMBL;Acc:AEE34787.1]	AT1G68380 AT1G68380.1 Core-2/I-branching beta-1,6-N-acetylglucosaminyltransferase family protein;(source:Araport11) protein_coding
AT3G61035	2.43785	1.28561	up	7.51656	2.91007	up	3.60015	1.84806	up	6.1862	2.62905	up	AT3G61035	Cytochrome P450 superfamily protein [Source:EMBL;Acc:AEE80141.1]	AT3G61035 AT3G61035.1 Cytochrome P450 superfamily protein;(source:Araport11) protein_coding
AT3G11370	6.97586	2.80237	up	7.32564	2.87295	up	3.95052	1.98204	up	2.243	1.16543	up	AT3G11370	cysteine/histidine-rich C1 domain-containing protein [Source:EMBL;Acc:AEE75034.1]	AT3G11370 AT3G11370.1 Cysteine/Histidine-rich C1 domain family protein;(source:Araport11) protein_coding
AT1G51780	1.00233	0.00335377	up	7.27215	2.86238	up	-1.78442	-0.835452	down	1.41634	0.502171	up	ILL5	IAA-amino acid hydrolase ILR1-like 5 [Source:EMBL;Acc:AEE32715.1]	AT1G51780 AT1G51780.1 encodes a member of the six Arabidopsis IAA-amino acid conjugate hydrolase subfamily and conjugates and is very similar to IAR3. protein_coding IAA-LEUCINE RESISTANT (ILR)-LIKE GENE 5 (ILL5) IAA-LEUCINE RESISTANT (ILR)-LIKE GENE 5 (ILL5)
AT4G09110	29.4874	4.88203	up	7.2575	2.85947	up	-1.42689	-0.512875	down	-5.7975	-2.53543	down	AT4G09110	putative RING-H2 finger protein ATL35 [Source:EMBL;Acc:AEE82723.1]	AT4G09110 AT4G09110.1 RING/U-box superfamily protein;(source:Araport11) protein_coding
AT5G10760	8.93067	3.15877	up	7.24609	2.8572	up	24.5365	4.61686	up	19.0904	4.25477	up	AT5G10760	aspartyl protease family protein [Source:EMBL;Acc:AED91593.1]	AT5G10760 AT5G10760.1 Eukaryotic aspartyl protease family protein;(source:Araport11) protein_coding APOPLASTIC, EDS1-DEPENDENT 1 (AED1) APOPLASTIC, EDS1-DEPENDENT 1 (AED1)
AT2G16060	2.04598	1.03279	up	7.22788	2.85357	up	1.16505	0.220387	up	6.7694	2.75903	up	GLB1	non-symbiotic hemoglobin 1 [Source:EMBL;Acc:AEC06463.1]	AT2G16060 AT2G16060.1 Encodes a class 1 nonsymbiotic hemoglobin induced by low oxygen levels with very high oxygen affinity. It is not likely to be a hemoglobin transporter because of its extremely high affinity for oxygen. Overexpression impairs cold stress-induced nitric oxide (NO) production. protein_coding HEMOGLOBIN 1 (HB1) CLASS I HEMOGLOBIN (GLB1);HEMOGLOBIN 1 (AHB1);HEMOGLOBIN 1 (HB1); (N…
AT1G31580	10.4003	3.37856	up	7.20486	2.84897	up	8.13508	3.02416	up	8.32057	3.05668	up	CXC750	protein ECS1 [Source:EMBL;Acc:AEE31373.1]	AT1G31580 AT1G31580.1 Encodes cell wall protein. ECS1 is not a Xcc750 resistance gene, but the genetic data indicate that ECS1 is linked to a locus influencing resistance to Xcc750. The mRNA is cell-to-cell mobile. protein_coding (ECS1) (ECS1); (CXC750)
AT4G09770	8.60927	3.10589	up	7.20195	2.84839	up	13.7371	3.78	up	17.6846	4.14442	up	AT4G09770	TRAF-like family protein [Source:EMBL;Acc:AEE82795.1]	AT4G09770 AT4G09770.1 TRAF-like family protein;(source:Araport11) protein_coding
AT5G12030	18.9595	4.24485	up	7.14433	2.8368	up	1.05869	0.082284	up	-1.33334	-0.415049	down	AT-HSP17.6A	heat shock protein 17.6A [Source:EMBL;Acc:AED91752.1]	AT5G12030 AT5G12030.1 Encodes a cytosolic small heat shock protein with chaperone activity that is induced by heat and osmotic stress and is also expressed late in seed development. protein_coding HEAT SHOCK PROTEIN 17.6A (HSP17.6A) HEAT SHOCK PROTEIN 17.6A (AT-HSP17.6A);HEAT SHOCK PROTEIN 17.6 (HSP17.6);HEAT SHOCK PROTEIN 17.6A (HSP17.6A)
AT1G57650	4.75951	2.25081	up	7.11765	2.8314	up	2.24509	1.16677	up	2.60833	1.38313	up	AT1G57650	ATP binding protein [Source:EMBL;Acc:AEE33448.1]	AT1G57650 AT1G57650.1 ATP binding protein;(source:Araport11) protein_coding
AT5G24640	3.26967	1.70914	up	7.056	2.81885	up	-2.29048	-1.19565	down	-2.72825	-1.44798	down	AT5G24640	uncharacterized protein [Source:EMBL;Acc:AED93343.1]	AT5G24640 AT5G24640.1 hypothetical protein;(source:Araport11) protein_coding
AT1G56120	9.89714	3.30701	up	6.98695	2.80466	up	9.93168	3.31204	up	6.29413	2.65401	up	AT1G56120	Leucine-rich repeat transmembrane protein kinase [Source:EMBL;Acc:AEE33346.1]	AT1G56120 AT1G56120.1 Leucine-rich repeat transmembrane protein kinase;(source:Araport11) protein_coding
AT1G52810	4.42547	2.14583	up	6.96785	2.80071	up	5.69644	2.51006	up	7.61149	2.92818	up	AT1G52810	2-oxoglutarate-dependent dioxygenase-related protein [Source:EMBL;Acc:AEE32854.1]	AT1G52810 AT1G52810.1 2-oxoglutarate (2OG) and Fe(II)-dependent oxygenase superfamily protein;(source:Araport11) protein_coding
AT3G62780	5.05259	2.33702	up	6.86503	2.77927	up	13.5063	3.75556	up	19.2914	4.26989	up	AT3G62780	calcium-dependent lipid-binding domain-containing protein [Source:EMBL;Acc:AEE80391.1]	AT3G62780 AT3G62780.1 Calcium-dependent lipid-binding (CaLB domain) family protein;(source:Araport11) protein_coding
AT4G16820	7.77609	2.95904	up	6.78096	2.76149	up	-1.48887	-0.574218	down	-4.04584	-2.01644	down	PLA-I{beta]2	lipase class 3 family protein [Source:EMBL;Acc:AEE83808.1]	AT4G16820 AT4G16820.1 Encodes a lipase that hydrolyzes phosphatidylcholine, glycolipids as well as triacylglycerols. protein_coding PHOSPHOLIPASE A I BETA 2 (PLA-I{beta]2) DAD1-LIKE LIPASE 1 (DALL1);PHOSPHOLIPASE A I BETA 2 (PLA-I{beta]2)
AT1G58390	3.13224	1.6472	up	6.75531	2.75602	up	2.6444	1.40294	up	2.55598	1.35388	up	AT1G58390	CC-NBS-LRR class disease resistance protein [Source:EMBL;Acc:AEE33544.1]	AT1G58390 AT1G58390.1 Disease resistance protein (CC-NBS-LRR class) family;(source:Araport11) protein_coding
AT1G51770	4.80791	2.26541	up	6.75047	2.75499	up	2.40549	1.26633	up	2.77785	1.47397	up	AT1G51770	Core-2/I-branching beta-1,6-N-acetylglucosaminyltransferase family protein [Source:EMBL;Acc:AEE32714.1]	AT1G51770 AT1G51770.1 Core-2/I-branching beta-1,6-N-acetylglucosaminyltransferase family protein;(source:Araport11) protein_coding
AT2G31345	8.42619	3.07488	up	6.72301	2.74911	up	-1.4277	-0.513693	down	-3.76943	-1.91435	down	AT2G31345	uncharacterized protein [Source:EMBL;Acc:AEC08530.1]	AT2G31345 AT2G31345.1 transmembrane protein;(source:Araport11) protein_coding
AT5G59490	9.74287	3.28435	up	6.68251	2.74039	up	4.43579	2.14919	up	4.90467	2.29416	up	AT5G59490	haloacid dehalogenase-like hydrolase domain-containing protein [Source:EMBL;Acc:AED97197.1]	AT5G59490 AT5G59490.1 Haloacid dehalogenase-like hydrolase (HAD) superfamily protein;(source:Araport11) protein_coding
AT4G31800	3.53373	1.82119	up	6.67015	2.73772	up	4.79897	2.26272	up	8.74759	3.12889	up	WRKY18	WRKY transcription factor 18 [Source:EMBL;Acc:AEE85961.1]	AT4G31800 AT4G31800.1 Pathogen-induced transcription factor. Binds W-box sequences in vitro. Forms protein complexes with itself and with WRKY40 and WRKY60. Constitutive expression of WRKY18 enhanced resistance to P. syringae, but its coexpression with WRKY40 or WRKY60 made plants more susceptible to both P. syringae and B. cinerea. WRKY18, WRKY40, and WRKY60 have partially redundant roles in res…
AT3G50200	7.34026	2.87583	up	6.65167	2.73372	up	11.3394	3.50327	up	13.8859	3.79555	up	AT3G50200	uncharacterized protein [Source:EMBL;Acc:AEE78638.1]	AT3G50200 AT3G50200.1 hypothetical protein (DUF247);(source:Araport11) protein_coding
AT5G26170	3.97784	1.99198	up	6.6209	2.72703	up	4.15543	2.055	up	7.28183	2.8643	up	WRKY50	putative WRKY transcription factor 50 [Source:EMBL;Acc:AED93532.1]	AT5G26170 AT5G26170.1 member of WRKY Transcription Factor; Group II-c. Involved in jasmonic acid inducible defense responses. protein_coding WRKY DNA-BINDING PROTEIN 50 (WRKY50) WRKY DNA-BINDING PROTEIN 50 (WRKY50);ARABIDOPSIS THALIANA WRKY DNA-BINDING PROTEIN 50 (ATWRKY50)
AT1G62840	3.27414	1.71112	up	6.60037	2.72255	up	-1.11074	-0.151525	down	1.62755	0.702703	up	AT1G62840	uncharacterized protein [Source:EMBL;Acc:AEE34011.1]	AT1G62840 AT1G62840.1 ankyrin repeat/KH domain protein (DUF1442);(source:Araport11) protein_coding
AT3G54530	3.1881	1.6727	up	6.58966	2.7202	up	-1.38056	-0.465255	down	-2.58226	-1.36863	down	AT3G54530	uncharacterized protein [Source:EMBL;Acc:AEE79246.1]	AT3G54530 AT3G54530.1 hypothetical protein;(source:Araport11) protein_coding
AT4G27220	23.3613	4.54605	up	6.53521	2.70823	up	3.82859	1.93681	up	1.96397	0.973769	up	AT4G27220	NB-ARC domain-containing disease resistance protein [Source:EMBL;Acc:AEE85312.1]	AT4G27220 AT4G27220.1 NB-ARC domain-containing disease resistance protein;(source:Araport11) protein_coding
AT2G41090	4.45274	2.15469	up	6.52249	2.70542	up	4.49117	2.16709	up	5.28937	2.40309	up	AT2G41090	calmodulin-like protein 10 [Source:EMBL;Acc:AEC09927.1]	AT2G41090 AT2G41090.1 Encodes a cytoplasmic, calcium binding calmodulin variant. CML10 interacts with phosphomannomutase (PMM)in vivo and increases its activity thereby affecting ascorbic acid biosynthesis. Its expression is induced by oxidative and other stress. The mRNA is cell-to-cell mobile. protein_coding CALMODULIN LIKE 10 (CML10) CALMODULIN LIKE 10 (CML10)
AT3G61190	5.79716	2.53535	up	6.52081	2.70505	up	2.78783	1.47914	up	6.06898	2.60145	up	BAP1	BON1-associated protein 1 [Source:EMBL;Acc:AEE80171.1]	AT3G61190 AT3G61190.1 Encodes a protein with a C2 domain that binds to BON1 in yeast two hybrid analyses. Its ability to bind to phospholipids is enhanced by calcium ions. Involved in maintaining cell homeostasis. protein_coding BON ASSOCIATION PROTEIN 1 (BAP1) BON ASSOCIATION PROTEIN 1 (BAP1)
AT1G58130	3.25209	1.70137	up	6.51898	2.70465	up	2.16375	1.11353	up	3.04331	1.60564	up	AT1G58130	pseudogene.[Source:TAIR;Acc:AT1G58130]	AT1G58130 AT1G58130.1 pseudogene of F-box/RNI-like/FBD-like domains-containing protein;(source:Araport11) pseudogene
AT4G04700	4.57913	2.19507	up	6.51334	2.7034	up	7.60198	2.92637	up	5.85276	2.54912	up	CPK27	calcium-dependent protein kinase 27 [Source:EMBL;Acc:AEE82414.1]	AT4G04700 AT4G04700.1 member of Calcium Dependent Protein Kinase protein_coding CALCIUM-DEPENDENT PROTEIN KINASE 27 (CPK27) CALCIUM-DEPENDENT PROTEIN KINASE 27 (CPK27)
AT4G02650	6.37218	2.67179	up	6.44034	2.68714	up	1.06371	0.0891104	up	-1.46907	-0.554905	down	AT4G02650	putative clathrin assembly protein [Source:EMBL;Acc:AEE82209.1]	AT4G02650 AT4G02650.1 ENTH/ANTH/VHS superfamily protein;(source:Araport11) protein_coding
AT2G33780	3.77371	1.91598	up	6.41404	2.68123	up	3.40666	1.76836	up	4.44224	2.15129	up	AT2G33780	VQ motif-containing protein [Source:EMBL;Acc:AEC08884.1]	AT2G33780 AT2G33780.1 VQ motif-containing protein;(source:Araport11) protein_coding MPK3/6-TARGETED VQP 2 (MVQ2) MPK3/6-TARGETED VQP 2 (MVQ2)
AT1G30900	4.13347	2.04735	up	6.39769	2.67755	up	10.0801	3.33344	up	9.06453	3.18023	up	VSR3;3	vacuolar sorting receptor 6 [Source:EMBL;Acc:AEE31291.1]	AT1G30900 AT1G30900.1 VACUOLAR SORTING RECEPTOR 6;(source:Araport11) protein_coding VACUOLAR SORTING RECEPTOR 6 (VSR6) VACUOLAR SORTING RECEPTOR 6 (VSR6);BINDING PROTEIN OF 80 KDA 3;3 (BP80-3;3);VACUOLAR SORTING RECEPTOR 3;3 (VSR3;3)
AT2G18660	2.79469	1.48269	up	6.38077	2.67373	up	5.65742	2.50015	up	6.50678	2.70194	up	PNP-A	EG45-like domain-containing protein 2 [Source:EMBL;Acc:AEC06790.1]	AT2G18660 AT2G18660.1 Encodes PNP-A (Plant Natriuretic Peptide A). PNPs are a class of systemically mobile molecules distantly related to expansins; their biological role has remained elusive. PNP-A contains a signal peptide domain and is secreted into the extracellular space. Co-expression analyses using microarray data suggest that PNP-A may function as a component of plant defence response and…
AT1G24145	5.27567	2.39935	up	6.3506	2.66689	up	5.05743	2.3384	up	8.05415	3.00973	up	AT1G24145	uncharacterized protein [Source:EMBL;Acc:AEE30483.1]	AT1G24145 AT1G24145.1 transmembrane protein;(source:Araport11) protein_coding
AT5G55450	4.51695	2.17535	up	6.3418	2.66489	up	11.1752	3.48223	up	11.8604	3.56808	up	AT5G55450	bifunctional inhibitor/lipid-transfer protein/seed storage 2S albumin-like protein [Source:EMBL;Acc:AED96630.1]	AT5G55450 AT5G55450.1 Bifunctional inhibitor/lipid-transfer protein/seed storage 2S albumin superfamily protein;(source:Araport11) protein_coding (ATLTP4.4) (ATLTP4.4)
AT5G48175	8.8543	3.14638	up	6.3406	2.66462	up	13.5549	3.76074	up	11.7747	3.55762	up	AT5G48175	uncharacterized protein [Source:EMBL;Acc:AED95629.1]	AT5G48175 AT5G48175.1 transmembrane protein;(source:Araport11) protein_coding
AT3G45860	12.1687	3.60511	up	6.31745	2.65934	up	9.06271	3.17994	up	5.28719	2.4025	up	CRK4	cysteine-rich receptor-like protein kinase 4 [Source:EMBL;Acc:AEE78083.1]	AT3G45860 AT3G45860.1 Encodes a cysteine-rich receptor-like protein kinase. Involved in programmed cell death and defense response to pathogen. protein_coding CYSTEINE-RICH RLK (RECEPTOR-LIKE PROTEIN KINASE) 4 (CRK4) CYSTEINE-RICH RLK (RECEPTOR-LIKE PROTEIN KINASE) 4 (CRK4)
AT1G61160	5.83916	2.54576	up	6.27055	2.64859	up	2.38535	1.2542	up	5.36792	2.42436	up	AT1G61160	uncharacterized protein [Source:EMBL;Acc:AEE33796.1]	AT1G61160 AT1G61160.1 retrotransposon gag;(source:Araport11) protein_coding
AT1G09080	2.63416	1.39734	up	6.26542	2.64741	up	-1.53178	-0.615213	down	-4.27596	-2.09625	down	BIP3	Hsp70 protein BiP chaperone BIP-L [Source:EMBL;Acc:AEE28392.1]	AT1G09080 AT1G09080.1 Heat shock protein 70 (Hsp 70) family protein;(source:Araport11) protein_coding BINDING PROTEIN 3 (BIP3) BINDING PROTEIN 3 (BIP3)
AT1G35710	7.35155	2.87805	up	6.23698	2.64085	up	9.71502	3.28022	up	8.37114	3.06542	up	AT1G35710	putative leucine-rich repeat receptor-like protein [Source:EMBL;Acc:AEE31824.1]	AT1G35710 AT1G35710.1 kinase family with leucine-rich repeat domain-containing protein;(source:Araport11) protein_coding
AT4G09780	5.57239	2.4783	up	6.21637	2.63607	up	9.48865	3.2462	up	25.9874	4.69974	up	AT4G09780	TRAF-like family protein [Source:EMBL;Acc:AEE82797.1]	AT4G09780 AT4G09780.1 TRAF-like family protein;(source:Araport11) protein_coding
AT3G50625	1.76075	0.816193	up	6.21279	2.63524	up	1.76075	0.816193	up	6.21279	2.63524	up	AT3G50625	transposable element gene.[Source:TAIR;Acc:AT3G50625]	AT3G50625 AT3G50625.1 transposable_element_gene;(source:Araport11);copia-like retrotransposon family, has a 6.1e-96 P-value blast match to dbj|BAA78425.1| polyprotein (Arabidopsis thaliana) (AtRE1) (Ty1_Copia-element);(source:TAIR10) transposable_element_gene
AT5G60900	8.28515	3.05053	up	6.19871	2.63197	up	15.3883	3.94376	up	7.98634	2.99753	up	RLK1	receptor-like protein kinase 1 [Source:EMBL;Acc:AED97394.1]	AT5G60900 AT5G60900.1 Encodes a receptor-like protein kinase. protein_coding RECEPTOR-LIKE PROTEIN KINASE 1 (RLK1) RECEPTOR-LIKE PROTEIN KINASE 1 (RLK1)
AT5G24210	3.67449	1.87754	up	6.18883	2.62967	up	3.7921	1.923	up	5.20554	2.38005	up	AT5G24210	lipase class 3 family protein [Source:EMBL;Acc:AED93271.1]	AT5G24210 AT5G24210.1 alpha/beta-Hydrolases superfamily protein;(source:Araport11) protein_coding
AT4G35170	5.98093	2.58037	up	6.15062	2.62073	up	1.28156	0.3579	up	2.69488	1.43022	up	AT4G35170	late embryogenesis abundant hydroxyproline-rich glycoprotein [Source:EMBL;Acc:AEE86476.1]	AT4G35170 AT4G35170.1 Late embryogenesis abundant (LEA) hydroxyproline-rich glycoprotein family;(source:Araport11) protein_coding COMPANION OF CELLULOSE SYNTHASE 4 (CC4) COMPANION OF CELLULOSE SYNTHASE 4 (CC4)
AT3G16150	8.92922	3.15853	up	6.13532	2.61714	up	-2.05221	-1.03718	down	-2.85746	-1.51473	down	AT3G16150	Isoaspartyl peptidase/L-asparaginase 2 subunit beta [Source:EMBL;Acc:AEE75777.1]	AT3G16150 AT3G16150.1 Encodes an asparaginase that catalyzes the degradation of L-asparagine to L-aspartic acid and ammonia. The mRNA is cell-to-cell mobile. protein_coding ASPARAGINASE B1 (ASPGB1) ASPARAGINASE B1 (ASPGB1)
AT5G13080	4.12322	2.04377	up	6.08023	2.60413	up	-1.10066	-0.138371	down	2.25122	1.17071	up	WRKY75	putative WRKY transcription factor 75 [Source:EMBL;Acc:AED91848.1]	AT5G13080 AT5G13080.1 WRKY75 is one of several transcription factors induced during Pi deprivation. It is nuclear localized and regulated differentially during Pi starvation. RNAi mediated suppression of WRKY75 made the plants more susceptible to Pi stress as indicated by the higher accumulation of anthocyanin during Pi starvation. protein_coding WRKY DNA-BINDING PROTEIN 75 (WRKY75) WRKY DNA-BIND…
AT5G41160	5.20277	2.37928	up	6.06647	2.60086	up	11.9706	3.58143	up	14.6447	3.87231	up	ATPUP12	putative purine permease 12 [Source:EMBL;Acc:AED94649.1]	AT5G41160 AT5G41160.1 Member of a family of proteins related to PUP1, a purine transporter. May be involved in the transport of purine and purine derivatives such as cytokinins, across the plasma membrane. protein_coding PURINE PERMEASE 12 (PUP12) PURINE PERMEASE 12 (PUP12);ARABIDOPSIS THALIANA PURINE PERMEASE 12 (ATPUP12)
AT1G23840	4.0906	2.03231	up	6.05377	2.59783	up	6.68916	2.74183	up	8.43114	3.07573	up	AT1G23840	uncharacterized protein [Source:EMBL;Acc:AEE30438.1]	AT1G23840 AT1G23840.1 transmembrane protein;(source:Araport11) protein_coding
AT3G46230	14.8424	3.89165	up	5.93125	2.56834	up	-1.00357	-0.00514507	down	-1.71557	-0.77869	down	ATHSP17.4	heat shock protein 17.4 [Source:EMBL;Acc:AEE78138.1]	AT3G46230 AT3G46230.1 member of the class I small heat-shock protein (sHSP) family, which accounts for the majority of sHSPs in maturing seeds protein_coding HEAT SHOCK PROTEIN 17.4 (HSP17.4) ARABIDOPSIS THALIANA HEAT SHOCK PROTEIN 17.4 (ATHSP17.4);HEAT SHOCK PROTEIN 17.4 (HSP17.4)
AT5G22200	2.39133	1.25782	up	5.90772	2.5626	up	3.48026	1.79919	up	6.82675	2.7712	up	AT5G22200	late embryogenesis abundant hydroxyproline-rich glycoprotein [Source:EMBL;Acc:AED92995.1]	AT5G22200 AT5G22200.1 Late embryogenesis abundant (LEA) hydroxyproline-rich glycoprotein family;(source:Araport11) protein_coding
AT1G21250	6.01812	2.58931	up	5.90703	2.56243	up	6.86578	2.77942	up	4.0348	2.0125	up	WAK1	wall-associated receptor kinase 1 [Source:EMBL;Acc:AEE30079.1]	AT1G21250 AT1G21250.1 Encodes a cell wall-associated kinase that interacts with AtGRP3 and may function as a signaling receptor of extracellular matrix component such as oligogalacturonides. The mRNA is cell-to-cell mobile. protein_coding CELL WALL-ASSOCIATED KINASE 1 (WAK1) (ATWAK1); (PRO25);CELL WALL-ASSOCIATED KINASE 1 (WAK1)
AT5G44570	5.57787	2.47972	up	5.90114	2.56099	up	5.79755	2.53544	up	10.8272	3.43658	up	AT5G44570	uncharacterized protein [Source:EMBL;Acc:AED95127.1]	AT5G44570 AT5G44570.2 Encodes a PPR protein involved in mitochondrial functioning. Mutants suppress cell wall defects caused by C17 chemical inhibitor. Mutants are defective in cytochrome c maturation and activation of mitochondrial retrograde signalling. protein_coding CELL WALL MAINTAINER 2 (CWM2) CELL WALL MAINTAINER 2 (CWM2)
AT1G02440	2.87535	1.52374	up	5.88899	2.55802	up	1.43348	0.519523	up	1.73658	0.796246	up	ATARFD1A	Arf/Sar family protein [Source:EMBL;Acc:AEE27430.1]	AT1G02440 AT1G02440.1 A member of ARF GTPase family. A thaliana has 21 members of this family, known to be essential for vesicle coating and uncoating and functions in GTP-binding. Gene encoding ADP-ribosylation factor and similar to other ARFs and ARF-like proteins. protein_coding ADP-RIBOSYLATION FACTOR D1A (ARFD1A) ADP-RIBOSYLATION FACTOR D1A (ARFD1A);ADP-RIBOSYLATION FACTOR D1A (ATARFD1A)
AT2G32680	4.63656	2.21305	up	5.85136	2.54877	up	8.74464	3.1284	up	4.733	2.24276	up	AtRLP23	receptor like protein 23 [Source:EMBL;Acc:AEC08715.1]	AT2G32680 AT2G32680.1 receptor like protein 23;(source:Araport11) protein_coding RECEPTOR LIKE PROTEIN 23 (RLP23) RECEPTOR LIKE PROTEIN 23 (RLP23);RECEPTOR LIKE PROTEIN 23 (AtRLP23)
AT5G24190	1.93405	0.951625	up	5.81602	2.54003	up	2.06984	1.04952	up	2.4497	1.2926	up	AT5G24190	lipase class 3-related protein [Source:EMBL;Acc:AED93269.1]	AT5G24190 AT5G24190.1 Lipase class 3-related protein;(source:Araport11) protein_coding
AT1G47880	3.79247	1.92314	up	5.81153	2.53892	up	2.32388	1.21654	up	2.25888	1.17561	up	AT1G47880	pseudogene.[Source:TAIR;Acc:AT1G47880]	AT1G47880 AT1G47880.1 pseudogene of receptor like protein 6;(source:Araport11) pseudogene
AT5G40010	5.33975	2.41677	up	5.80198	2.53655	up	1.24319	0.314046	up	3.41493	1.77185	up	AATP1	AAA-ATPase 1 [Source:EMBL;Acc:AED94501.1]	AT5G40010 AT5G40010.1 Encodes a mitochondrial ATPase involved in seed and silique development. protein_coding AAA-ATPASE 1 (AATP1) ATPASE-IN-SEED-DEVELOPMENT (ASD);AAA-ATPASE 1 (AATP1)
AT1G73805	3.9314	1.97504	up	5.787	2.53282	up	3.37658	1.75556	up	5.97536	2.57902	up	AT1G73805	calmodulin binding protein-like protein [Source:EMBL;Acc:AEE35510.1]	AT1G73805 AT1G73805.1 Encodes SAR Deficient 1 (SARD1), a key regulator for ICS1 (Isochorismate Synthase 1) induction and salicylic acid (SA) synthesis. protein_coding SAR DEFICIENT 1 (SARD1) SAR DEFICIENT 1 (SARD1)
AT1G76960	5.96465	2.57644	up	5.74592	2.52254	up	3.65633	1.8704	up	6.08262	2.60469	up	AT1G76960	uncharacterized protein [Source:EMBL;Acc:AEE35912.1]	AT1G76960 AT1G76960.1 transmembrane protein;(source:Araport11) protein_coding
AT5G62770	4.2559	2.08947	up	5.73055	2.51867	up	3.69042	1.88378	up	7.25964	2.8599	up	AT5G62770	uncharacterized protein [Source:EMBL;Acc:AED97655.1]	AT5G62770 AT5G62770.1 membrane-associated kinase regulator, putative (DUF1645);(source:Araport11) protein_coding
AT1G59780	3.44266	1.78352	up	5.71369	2.51442	up	3.04971	1.60867	up	1.87995	0.910697	up	AT1G59780	NB-ARC domain-containing disease resistance protein [Source:EMBL;Acc:AEE33617.1]	AT1G59780 AT1G59780.1 NB-ARC domain-containing disease resistance protein;(source:Araport11) protein_coding
AT5G55170	3.47358	1.79642	up	5.71303	2.51426	up	3.63688	1.8627	up	7.24109	2.85621	up	SUM3	small ubiquitin-related modifier 3 [Source:EMBL;Acc:AED96595.1]	AT5G55170 AT5G55170.1 Encodes a small ubiquitin-like modifier (SUMO) polypeptide that becomes covalently attached to various intracellular protein targets, much like ubiquitination, leading to post-translational modification of those targets. protein_coding SMALL UBIQUITIN-LIKE MODIFIER 3 (SUMO3) SMALL UBIQUITIN-LIKE MODIFIER 3 (SUM3); (ATSUMO3);SMALL UBIQUITIN-LIKE MODIFIER 3 (SUMO3);SMALL UBIQU…
AT1G18830	2.54263	1.34632	up	5.6753	2.5047	up	-1.18009	-0.238901	down	-2.1323	-1.09241	down	AT1G18830	transducin/WD-40 repeat-containing protein [Source:EMBL;Acc:AEE29767.1]	AT1G18830 AT1G18830.1 Transducin/WD40 repeat-like superfamily protein;(source:Araport11) protein_coding (SEC31A) (SEC31A)
AT5G40230	4.10658	2.03794	up	5.65554	2.49966	up	3.50854	1.81087	up	4.13858	2.04914	up	AT5G40230	nodulin MtN21 /EamA-like transporter family protein [Source:EMBL;Acc:AED94522.1]	AT5G40230 AT5G40230.1 nodulin MtN21-like transporter family protein protein_coding USUALLY MULTIPLE ACIDS MOVE IN AND OUT TRANSPORTERS 37 (UMAMIT37) USUALLY MULTIPLE ACIDS MOVE IN AND OUT TRANSPORTERS 37 (UMAMIT37)
AT4G27670	23.7976	4.57274	up	5.64182	2.49616	up	-1.63696	-0.711015	down	-2.08392	-1.0593	down	HSP21	heat shock protein 21 [Source:EMBL;Acc:AEE85379.1]	AT4G27670 AT4G27670.1 Encodes Hsp21, a chloroplast located small heat shock protein. A structure model of Hsp21, obtained by homology modeling, single-particle electron microscopy, and lysine-specific chemical crosslinking, shows that the Hsp21 subunits are arranged in two hexameric discs, rotated by 25 degree in relation to each other. protein_coding HEAT SHOCK PROTEIN 21 (HSP21) HEAT SHOCK PROT…
AT1G08050	3.07518	1.62067	up	5.63568	2.49459	up	1.5093	0.593883	up	1.41243	0.498182	up	AT1G08050	C3HC4-type RING finger-containing protein [Source:EMBL;Acc:AEE28235.1]	AT1G08050 AT1G08050.1 Zinc finger (C3HC4-type RING finger) family protein;(source:Araport11) protein_coding
AT1G35910	3.06783	1.61722	up	5.61705	2.48981	up	1.65348	0.725509	up	2.64283	1.40209	up	TPPD	haloacid dehalogenase-like hydrolase domain-containing protein [Source:EMBL;Acc:AEE31836.1]	AT1G35910 AT1G35910.1 Haloacid dehalogenase-like hydrolase (HAD) superfamily protein;(source:Araport11) protein_coding TREHALOSE-6-PHOSPHATE PHOSPHATASE D (TPPD) (ATTPPD);TREHALOSE-6-PHOSPHATE PHOSPHATASE D (TPPD)
AT3G28890	6.46333	2.69228	up	5.53556	2.46873	up	3.60387	1.84955	up	2.73553	1.45182	up	RLP43	receptor like protein 43 [Source:EMBL;Acc:AEE77502.1]	AT3G28890 AT3G28890.1 receptor like protein 43;(source:Araport11) protein_coding RECEPTOR LIKE PROTEIN 43 (RLP43) RECEPTOR LIKE PROTEIN 43 (AtRLP43);RECEPTOR LIKE PROTEIN 43 (RLP43)
AT3G60164	3.41962	1.77384	up	5.52724	2.46656	up	3.17208	1.66543	up	4.44304	2.15155	up	AT3G60164	Pseudogene of AT3G60966protein binding / zinc ion binding.[Source:TAIR;Acc:AT3G60164]	AT3G60164 AT3G60164.1 Pseudogene of AT3G60966; protein binding / zinc ion binding pseudogene
AT5G22540	7.77916	2.95961	up	5.50315	2.46026	up	3.88185	1.95674	up	3.11602	1.63971	up	AT5G22540	uncharacterized protein [Source:EMBL;Acc:AED93038.1]	AT5G22540 AT5G22540.1 transmembrane protein, putative (DUF247);(source:Araport11) protein_coding
AT5G52760	4.34093	2.11801	up	5.49614	2.45842	up	4.46159	2.15756	up	9.28229	3.21448	up	AT5G52760	copper transport family protein [Source:EMBL;Acc:AED96257.1]	AT5G52760 AT5G52760.1 Copper transport protein family;(source:Araport11) protein_coding
AT5G59670	19.6322	4.29515	up	5.49401	2.45786	up	13.5477	3.75998	up	5.642	2.49621	up	AT5G59670	Receptor-like protein kinase [Source:EMBL;Acc:AED97218.1]	AT5G59670 AT5G59670.1 Leucine-rich repeat protein kinase family protein;(source:Araport11) protein_coding
AT1G21245	5.08955	2.34754	up	5.47025	2.45161	up	5.81968	2.54094	up	5.54163	2.47031	up	AT1G21245	leucine-rich repeat receptor-like protein kinase [Source:EMBL;Acc:AEE30078.1]	AT1G21245 AT1G21245.1 Protein kinase superfamily protein;(source:Araport11) protein_coding
AT3G11010	6.57141	2.7162	up	5.4658	2.45043	up	8.18093	3.03226	up	5.86018	2.55094	up	AtRLP34	receptor like protein 34 [Source:EMBL;Acc:AEE74993.1]	AT3G11010 AT3G11010.1 receptor like protein 34;(source:Araport11) protein_coding RECEPTOR LIKE PROTEIN 34 (RLP34) RECEPTOR LIKE PROTEIN 34 (RLP34);RECEPTOR LIKE PROTEIN 34 (AtRLP34)
AT5G59580	10.218	3.35304	up	5.44637	2.4453	up	3.73141	1.89972	up	5.24827	2.39184	up	UGT76E1	UDP-glucosyl transferase 76E1 [Source:EMBL;Acc:AED97208.1]	AT5G59580 AT5G59580.1 UDP-glucosyl transferase 76E1;(source:Araport11) protein_coding UDP-GLUCOSYL TRANSFERASE 76E1 (UGT76E1) UDP-GLUCOSYL TRANSFERASE 76E1 (UGT76E1)
AT3G29240	5.58354	2.48118	up	5.41742	2.43761	up	4.24729	2.08654	up	8.1139	3.02039	up	AT3G29240	uncharacterized protein [Source:EMBL;Acc:AEE77555.1]	AT3G29240 AT3G29240.1 PPR containing protein (DUF179);(source:Araport11) protein_coding
AT2G45220	4.55539	2.18757	up	5.39062	2.43045	up	1.87944	0.9103	up	1.78505	0.835969	up	AT2G45220	pectinesterase 17 [Source:EMBL;Acc:AEC10527.1]	AT2G45220 AT2G45220.1 Plant invertase/pectin methylesterase inhibitor superfamily;(source:Araport11) protein_coding PECTIN METHYLESTERASE 17 (PME17) PECTIN METHYLESTERASE 17 (PME17); (ATPME17)
AT1G21210	4.46745	2.15945	up	5.37059	2.42508	up	5.34326	2.41772	up	4.15999	2.05658	up	WAK4	wall-associated receptor kinase 4 [Source:EMBL;Acc:AEE30075.1]	AT1G21210 AT1G21210.1 cell wall-associated ser/thr kinase involved in cell elongation and lateral root development protein_coding WALL ASSOCIATED KINASE 4 (WAK4) WALL ASSOCIATED KINASE 4 (WAK4)
AT4G22305	2.96873	1.56985	up	5.3238	2.41246	up	4.2519	2.08811	up	5.84552	2.54733	up	AT4G22305	alpha/beta-hydrolase-like protein [Source:EMBL;Acc:AEE84590.1]	AT4G22305 AT4G22305.1 encodes a carboxylesterase that inhibits AvrBsT-triggered phenotypes in Arabidopsis protein_coding
AT4G25845	2.19534	1.13445	up	5.30876	2.40838	up	-1.38187	-0.466623	down	1.22558	0.293465	up	AT4G25845	uncharacterized protein [Source:EMBL;Acc:AEE85122.1]	AT4G25845 AT4G25845.1 oxysterol-binding 4B-like protein;(source:Araport11) protein_coding
AT1G13550	1.88709	0.916164	up	5.30263	2.40671	up	2.80423	1.4876	up	2.80023	1.48554	up	AT1G13550	uncharacterized protein [Source:EMBL;Acc:AEE29032.1]	AT1G13550 AT1G13550.1 hypothetical protein (DUF1262);(source:Araport11) protein_coding
AT3G24640	2.51159	1.3286	up	5.29144	2.40366	up	1.35895	0.442495	up	3.93637	1.97686	up	AT3G24640	lyase [Source:EMBL;Acc:AEE76932.1]	AT3G24640 AT3G24640.1 lyase;(source:Araport11) protein_coding
AT1G17610	4.75642	2.24988	up	5.28853	2.40287	up	4.81633	2.26794	up	6.61471	2.72568	up	AT1G17610	Disease resistance protein (TIR-NBS class) [Source:EMBL;Acc:AEE29613.1]	AT1G17610 AT1G17610.1 TN-type protein that controls temperature-dependent growth and defense responses .Mutant accumulates steryl-esters at low temperatures and shows temperature dependent activation of defense responses.. protein_coding CHILLING SENSITIVE 1 (CHS1) CHILLING SENSITIVE 1 (CHS1)
AT3G11390	3.59873	1.84749	up	5.26883	2.39748	up	7.5406	2.91468	up	3.89702	1.96237	up	AT3G11390	cysteine/histidine-rich C1 domain-containing protein [Source:EMBL;Acc:AEE75037.1]	AT3G11390 AT3G11390.1 Cysteine/Histidine-rich C1 domain family protein;(source:Araport11) protein_coding
AT4G18430	2.65071	1.40638	up	5.24819	2.39182	up	2.29743	1.20002	up	3.06626	1.61648	up	AtRABA1e	RAB GTPase homolog A1E [Source:EMBL;Acc:AEE84045.1]	AT4G18430 AT4G18430.1 RAB GTPase homolog A1E;(source:Araport11) protein_coding RAB GTPASE HOMOLOG A1E (RABA1e) RAB GTPASE HOMOLOG A1E (RABA1e);RAB GTPASE HOMOLOG A1E (AtRABA1e)
AT2G24165	3.81067	1.93004	up	5.22044	2.38417	up	6.58715	2.71966	up	3.65565	1.87013	up	AT2G24165	pseudogene.[Source:TAIR;Acc:AT2G24165]	AT2G24165 AT2G24165.1 pseudogene of receptor like protein 30;(source:Araport11) pseudogene
AT4G08860	1.28009	0.356246	up	5.20858	2.38089	up	2.93503	1.55337	up	1.19604	0.258263	up	AT4G08860		AT4G08860 AT4G08860.1 transposable_element_gene;(source:Araport11);similar to nucleic acid binding / ribonuclease H [Arabidopsis thaliana] (TAIR:AT2G27870.1);(source:TAIR10) transposable_element_gene
AT3G13500	3.52771	1.81873	up	5.16452	2.36864	up	1.80047	0.84837	up	1.55655	0.638353	up	AT3G13500	uncharacterized protein [Source:EMBL;Acc:AEE75365.1]	AT3G13500 AT3G13500.1 hypothetical protein;(source:Araport11) protein_coding
AT4G30230	2.57578	1.36501	up	5.14741	2.36385	up	4.31113	2.10807	up	5.7344	2.51964	up	AT4G30230	uncharacterized protein [Source:EMBL;Acc:AEE85741.1]	AT4G30230 AT4G30230.1 hypothetical protein;(source:Araport11) protein_coding
AT5G48290	3.01344	1.59141	up	5.14358	2.36277	up	1.51243	0.59687	up	2.04746	1.03384	up	AT5G48290	heavy metal transport/detoxification domain-containing protein [Source:EMBL;Acc:AED95647.1]	AT5G48290 AT5G48290.1 Heavy metal transport/detoxification superfamily protein;(source:Araport11) protein_coding
AT3G25010	3.97162	1.98973	up	5.13094	2.35922	up	3.92739	1.97357	up	3.15792	1.65898	up	AtRLP41	receptor like protein 41 [Source:EMBL;Acc:AEE76964.1]	AT3G25010 AT3G25010.1 receptor like protein 41;(source:Araport11) protein_coding RECEPTOR LIKE PROTEIN 41 (RLP41) RECEPTOR LIKE PROTEIN 41 (RLP41);RECEPTOR LIKE PROTEIN 41 (AtRLP41)
AT3G60966	3.92558	1.97291	up	5.11977	2.35608	up	3.04018	1.60415	up	4.39547	2.13602	up	AT3G60966	protein binding / zinc ion binding protein [Source:EMBL;Acc:AEE80132.1]	AT3G60966 AT3G60966.1 RING/U-box superfamily protein;(source:Araport11) protein_coding
AT1G45145	3.82908	1.937	up	5.06203	2.33972	up	2.63274	1.39657	up	5.0079	2.32421	up	ATTRX5	thioredoxin H5 [Source:EMBL;Acc:AEE32083.1]	AT1G45145 AT1G45145.1 encodes a cytosolic thioredoxin that reduces disulfide bridges of target proteins by the reversible formation of a disulfide bridge between two neighboring Cys residues present in the active site. Thioredoxins have been found to regulate a variety of biological reactions in prokaryotic and eukaryotic cells. protein_coding THIOREDOXIN H-TYPE 5 (TRX5) THIOREDOXIN H-TYPE 5 (ATT…
AT2G19500	4.68489	2.22801	up	5.04653	2.33529	up	1.67498	0.744145	up	1.22016	0.287076	up	CKX2	cytokinin dehydrogenase 2 [Source:EMBL;Acc:AEC06889.1]	AT2G19500 AT2G19500.1 It encodes a protein whose sequence is similar to cytokinin oxidase/dehydrogenase, which catalyzes the degradation of cytokinins. protein_coding CYTOKININ OXIDASE 2 (CKX2) (ATCKX2);CYTOKININ OXIDASE 2 (CKX2)
AT2G02700	7.57127	2.92054	up	5.04043	2.33355	up	-1.3341	-0.415865	down	-1.54145	-0.624291	down	AT2G02700	cysteine/histidine-rich C1 domain-containing protein [Source:EMBL;Acc:AEC05611.1]	AT2G02700 AT2G02700.1 Cysteine/Histidine-rich C1 domain family protein;(source:Araport11) protein_coding
AT4G04695	3.65188	1.86864	up	5.03319	2.33147	up	4.8116	2.26652	up	4.34537	2.11948	up	CPK31	calcium-dependent protein kinase 31 [Source:EMBL;Acc:AEE82413.1]	AT4G04695 AT4G04695.1 member of Calcium Dependent Protein Kinase. Involved in response to salicylic acid. protein_coding CALCIUM-DEPENDENT PROTEIN KINASE 31 (CPK31) CALCIUM-DEPENDENT PROTEIN KINASE 31 (CPK31)
AT1G66380	2.20275	1.1393	up	5.03294	2.3314	up	3.04061	1.60436	up	4.69144	2.23003	up	MYB114	transcription factor MYB114 [Source:EMBL;Acc:AEE34502.1]	AT1G66380 AT1G66380.1 Encodes a member of the MYB family of transcription factors. Involved in regulation of anthocyanin biosynthesis. Affects the expression of enzymes involved in later steps of anthocyanin biosynthesis protein_coding MYB DOMAIN PROTEIN 114 (MYB114) MYB DOMAIN PROTEIN 114 (AtMYB114);MYB DOMAIN PROTEIN 114 (MYB114)
AT1G13750	3.80725	1.92875	up	4.99807	2.32137	up	4.16465	2.0582	up	3.97139	1.98965	up	AT1G13750	putative inactive purple acid phosphatase 1 [Source:EMBL;Acc:AEE29063.1]	AT1G13750 AT1G13750.1 Encodes a purple acid phosphatase whose expression is responsive to both phosphate (Pi) and phosphite (Phi) in roots. protein_coding PURPLE ACID PHOSPHATASE 1 (PAP1) ARABIDOPSIS THALIANA PURPLE ACID PHOSPHATASE 1 (ATPAP1);PURPLE ACID PHOSPHATASE 1 (PAP1)
AT2G02250	4.24011	2.0841	up	4.99717	2.32111	up	1.56652	0.64756	up	4.20799	2.07313	up	AtPP2-B2	phloem protein 2-B2 [Source:EMBL;Acc:AEC05561.1]	AT2G02250 AT2G02250.1 phloem protein 2-B2;(source:Araport11) protein_coding PHLOEM PROTEIN 2-B2 (PP2-B2) PHLOEM PROTEIN 2-B2 (PP2-B2);PHLOEM PROTEIN 2-B2 (AtPP2-B2)
AT1G22210	5.36336	2.42314	up	4.98115	2.31648	up	2.93951	1.55557	up	2.86046	1.51625	up	TPPC	haloacid dehalogenase-like hydrolase [Source:EMBL;Acc:AEE30212.1]	AT1G22210 AT1G22210.1 Haloacid dehalogenase-like hydrolase (HAD) superfamily protein;(source:Araport11) protein_coding TREHALOSE-6-PHOSPHATE PHOSPHATASE C (TPPC) TREHALOSE-6-PHOSPHATE PHOSPHATASE C (TPPC)
AT3G60140	33.6454	5.07234	up	4.97677	2.31521	up	-2.11875	-1.08321	down	-2.48625	-1.31397	down	DIN2	beta-glucosidase 30 [Source:EMBL;Acc:AEE80017.1]	AT3G60140 AT3G60140.1 Encodes a protein similar to beta-glucosidase and is a member of glycoside hydrolase family 1. Expression is induced after 24 hours of dark treatment, in senescing leaves and treatment with exogenous photosynthesis inhibitor. Induction of gene expression was suppressed in excised leaves supplied with sugar. The authors suggest that the gene's expression pattern is responding…
AT5G13940	2.53774	1.34354	up	4.97158	2.3137	up	3.04841	1.60806	up	3.86473	1.95037	up	AT5G13940	aminopeptidase [Source:EMBL;Acc:AED91962.1]	AT5G13940 AT5G13940.1 aminopeptidase;(source:Araport11) protein_coding
AT1G42980	3.69951	1.88733	up	4.96771	2.31258	up	-1.86491	-0.899103	down	-1.94163	-0.957271	down	AT1G42980	formin-like protein 12 [Source:EMBL;Acc:AEE31934.1]	AT1G42980 AT1G42980.1 Actin-binding FH2 (formin homology 2) family protein;(source:Araport11) protein_coding
AT3G22910	5.50275	2.46015	up	4.91852	2.29822	up	1.27425	0.34965	up	1.05131	0.0721903	up	AT3G22910	Ca2+-transporting ATPase [Source:EMBL;Acc:AEE76690.1]	AT3G22910 AT3G22910.1 ATPase E1-E2 type family protein / haloacid dehalogenase-like hydrolase family protein;(source:Araport11) protein_coding AUTO-INHIBITED CA2+ ATPASE 13 (ACA13)
AT4G39610	8.31908	3.05642	up	4.91164	2.29621	up	1.35923	0.442786	up	-2.44266	-1.28846	down	AT4G39610	uncharacterized protein [Source:EMBL;Acc:AEE87093.1]	AT4G39610 AT4G39610.1 MIZU-KUSSEI-like protein (Protein of unknown function, DUF617);(source:Araport11) protein_coding
AT1G01560	4.31047	2.10785	up	4.89575	2.29153	up	2.77668	1.47336	up	2.94292	1.55725	up	MPK11	mitogen-activated protein kinase 11 [Source:EMBL;Acc:AEE27305.1]	AT1G01560 AT1G01560.2 Member of MAP Kinase family. Flg22-induced activation is blocked by AvrRpt2. protein_coding MAP KINASE 11 (MPK11) MAP KINASE 11 (ATMPK11);MAP KINASE 11 (MPK11)
AT4G15075	3.01625	1.59276	up	4.89249	2.29057	up	1.95022	0.963638	up	2.71418	1.44052	up	AT4G15075	FBD-like domain family protein [Source:EMBL;Acc:AEE83551.1]	AT4G15075 AT4G15075.1 FBD-like domain family protein;(source:Araport11) protein_coding
AT5G09470	1.96538	0.974805	up	4.87715	2.28604	up	1.83983	0.87957	up	1.1167	0.159244	up	DIC3	dicarboxylate carrier 3 [Source:EMBL;Acc:AED91400.1]	AT5G09470 AT5G09470.1 Encodes one of the mitochondrial dicarboxylate carriers (DIC): DIC1 (AT2G22500), DIC2 (AT4G24570), DIC3 (AT5G09470). protein_coding DICARBOXYLATE CARRIER 3 (DIC3) DICARBOXYLATE CARRIER 3 (DIC3)
AT5G57550	5.3111	2.40901	up	4.86033	2.28105	up	3.87528	1.9543	up	10.844	3.43882	up	XTH25	xyloglucan:xyloglucosyl transferase [Source:EMBL;Acc:AED96914.1]	AT5G57550 AT5G57550.1 xyloglucan endotransglycosylase-related protein (XTR3) protein_coding XYLOGLUCAN ENDOTRANSGLUCOSYLASE/HYDROLASE 25 (XTH25) XYLOGLUCAN ENDOTRANSGLYCOSYLASE 3 (XTR3);XYLOGLUCAN ENDOTRANSGLUCOSYLASE/HYDROLASE 25 (XTH25)
AT3G56710	6.49532	2.6994	up	4.85148	2.27842	up	2.29311	1.19731	up	3.1791	1.66862	up	SIB1	sigma factor binding protein 1 [Source:EMBL;Acc:AEE79554.1]	AT3G56710 AT3G56710.1 Sig1 binding protein; interacts with Sig1R4. As well as Sig1, SibI is imported into chloroplasts and its expression is light-dependent in mature chloroplasts. protein_coding SIGMA FACTOR BINDING PROTEIN 1 (SIB1) SIGMA FACTOR BINDING PROTEIN 1 (SIB1)
AT5G39190	3.71711	1.89418	up	4.78716	2.25917	up	4.25717	2.08989	up	5.97965	2.58006	up	GLP2A	germin-like protein subfamily 1 member 20 [Source:EMBL;Acc:AED94405.1]	AT5G39190 AT5G39190.1 germin-like protein (GLP2a) protein_coding GERMIN-LIKE PROTEIN 2 (GER2) GERMIN-LIKE PROTEIN 2A (GLP2A);GERMIN-LIKE PROTEIN 2 (GER2);A. THALIANA GERMIN LIKE PROTEIN 2 (ATGER2)
AT1G60130	1.91889	0.940274	up	4.73219	2.24251	up	2.21264	1.14577	up	2.80643	1.48874	up	AT1G60130	jacalin-like lectin domain-containing protein [Source:EMBL;Acc:AEE33661.1]	AT1G60130 AT1G60130.1 Mannose-binding lectin superfamily protein;(source:Araport11) protein_coding
AT2G47895	13.7375	3.78005	up	4.72636	2.24073	up	-1.60356	-0.68128	down	-2.3329	-1.22213	down	AT2G47895	other RNA.[Source:TAIR;Acc:AT2G47895]	AT2G47895 AT2G47895.1 Potential natural antisense gene, locus overlaps with AT2G47900 antisense_long_noncoding_rna
AT5G64910	3.03081	1.5997	up	4.68846	2.22911	up	-1.38601	-0.47094	down	1.27144	0.34646	up	AT5G64910	uncharacterized protein [Source:EMBL;Acc:AED97969.1]	AT5G64910 AT5G64910.1 Serine/Threonine-kinase;(source:Araport11) protein_coding
AT5G39160	3.61836	1.85534	up	4.68133	2.22692	up	4.27792	2.09691	up	5.9479	2.57238	up	AT5G39160	germin-like protein subfamily 1 member 18 [Source:EMBL;Acc:AED94402.1]	AT5G39160 AT5G39160.1 RmlC-like cupins superfamily protein;(source:Araport11) protein_coding
AT3G54520	2.80144	1.48617	up	4.63932	2.21391	up	-1.28539	-0.362203	down	-1.75345	-0.810198	down	AT3G54520	uncharacterized protein [Source:EMBL;Acc:AEE79245.1]	AT3G54520 AT3G54520.1 hypothetical protein;(source:Araport11) protein_coding
AT5G12020	11.3178	3.50052	up	4.63255	2.21181	up	-1.03297	-0.0467925	down	-1.24867	-0.320391	down	HSP17.6II	heat shock protein 17.6-II [Source:EMBL;Acc:AED91751.1]	AT5G12020 AT5G12020.1 17.6 kDa class II heat shock protein;(source:Araport11) protein_coding 17.6 KDA CLASS II HEAT SHOCK PROTEIN (HSP17.6II) 17.6 KDA CLASS II HEAT SHOCK PROTEIN (HSP17.6II)
AT2G34390	1.51561	0.5999	up	4.61553	2.2065	up	-2.27989	-1.18896	down	2.01307	1.0094	up	NLM4	aquaporin NIP2-1 [Source:EMBL;Acc:AEC08967.1]	AT2G34390 AT2G34390.1 aquaporin NIP2.1 protein_coding NOD26-LIKE INTRINSIC PROTEIN 2;1 (NIP2;1) NOD26-LIKE MIP 4 (NLM4);NOD26-LIKE INTRINSIC PROTEIN 2;1 (NIP2;1)
AT5G64401	1.87929	0.91019	up	4.5988	2.20126	up	1.32538	0.406406	up	1.54234	0.625123	up	AT5G64401	uncharacterized protein [Source:EMBL;Acc:AED97889.1]	AT5G64401 AT5G64401.1 hypothetical protein;(source:Araport11) protein_coding
AT2G46430	3.07681	1.62143	up	4.59283	2.19938	up	3.27439	1.71123	up	2.58158	1.36826	up	CNGC3.C	cyclic nucleotide gated channel [Source:EMBL;Acc:AEC10695.1]	AT2G46430 AT2G46430.1 Encodes a cyclic nucleotide gated channel, downstream component of the signaling pathways leading to hypersensitive response (HR) resistance. protein_coding CYCLIC NUCLEOTIDE GATED CHANNEL 3 (CNGC3) CYCLIC NUCLEOTIDE GATED CHANNEL 3 (ATCNGC3); (CNGC3.C);CYCLIC NUCLEOTIDE GATED CHANNEL 3 (CNGC3)
AT4G21380	4.1545	2.05468	up	4.57665	2.19429	up	4.12461	2.04426	up	2.88015	1.52614	up	ARK3	receptor kinase 3 [Source:EMBL;Acc:AEE84446.1]	AT4G21380 AT4G21380.1 encodes a putative receptor-like serine/threonine protein kinases that is similar to Brassica self-incompatibility (S) locus. Expressed in root. Shoot expression limited to limited to the root-hypocotyl transition zone and at the base of lateral roots as well as in axillary buds, and pedicels. protein_coding RECEPTOR KINASE 3 (RK3) RECEPTOR KINASE 3 (RK3);RECEPTOR KINASE 3 (…
AT3G48650	2.90737	1.53971	up	4.56915	2.19193	up	2.23563	1.16068	up	3.46008	1.79081	up	AT3G48650	pseudogene.[Source:TAIR;Acc:AT3G48650]	AT3G48650 AT3G48650.1 pseudogene of pectinesterase;(source:Araport11) pseudogene
AT2G31018	2.85062	1.51127	up	4.56502	2.19062	up	-1.1056	-0.144827	down	-1.71106	-0.774889	down	AT2G31018	uncharacterized protein [Source:EMBL;Acc:AEC08478.1]	AT2G31018 AT2G31018.1 hypothetical protein;(source:Araport11) protein_coding
AT1G15790	2.74704	1.45788	up	4.56251	2.18983	up	2.07476	1.05295	up	3.47689	1.7978	up	AT1G15790	uncharacterized protein [Source:EMBL;Acc:AEE29366.1]	AT1G15790 AT1G15790.1 mediator of RNA polymerase II transcription subunit 15a-like protein;(source:Araport11) protein_coding
AT1G30455	2.72186	1.44459	up	4.55562	2.18765	up	1.08316	0.115246	up	1.13012	0.176477	up	AT1G30455	transcription regulator / translation initiation factor /zinc ion binding / transcription activator [Source:EMBL;Acc:AEE31220.1]	AT1G30455 AT1G30455.1 cyclin/Brf1-like TBP-binding domain-containing protein;(source:Araport11) protein_coding
AT1G71520	4.13058	2.04635	up	4.55261	2.18669	up	-3.06533	-1.61604	down	-2.60853	-1.38324	down	AT1G71520	ethylene-responsive transcription factor ERF020 [Source:EMBL;Acc:AEE35209.1]	AT1G71520 AT1G71520.1 encodes a member of the DREB subfamily A-5 of ERF/AP2 transcription factor family. The protein contains one AP2 domain. There are 16 members in this subfamily including RAP2.1, RAP2.9 and RAP2.10. protein_coding
AT1G21240	4.58841	2.19799	up	4.54217	2.18338	up	7.58641	2.92342	up	5.36996	2.42491	up	WAK3	wall-associated receptor kinase 3 [Source:EMBL;Acc:AEE30077.1]	AT1G21240 AT1G21240.1 encodes a wall-associated kinase The mRNA is cell-to-cell mobile. protein_coding WALL ASSOCIATED KINASE 3 (WAK3) WALL ASSOCIATED KINASE 3 (WAK3)
AT1G52560	10.4682	3.38795	up	4.51101	2.17345	up	-1.3575	-0.440955	down	-3.51992	-1.81554	down	AT1G52560	HSP20-like chaperone [Source:EMBL;Acc:AEE32822.1]	AT1G52560 AT1G52560.1 HSP20-like chaperones superfamily protein;(source:Araport11) protein_coding
AT4G11890	2.04036	1.02882	up	4.4679	2.1596	up	2.55265	1.35199	up	3.64422	1.86561	up	AT4G11890	protein kinase family protein [Source:EMBL;Acc:AEE83066.1]	AT4G11890 AT4G11890.3 Encodes a receptor-like cytosolic kinase ARCK1. Negatively controls abscisic acid and osmotic stress signal transduction. protein_coding ABA- AND OSMOTIC-STRESS-INDUCIBLE RECEPTOR-LIKE CYTOSOLIC KINASE1 (ARCK1) CYSTEINE-RICH RECEPTOR-LIKE PROTEIN KINASE 45 (CRK45);ABA- AND OSMOTIC-STRESS-INDUCIBLE RECEPTOR-LIKE CYTOSOLIC KINASE1 (ARCK1)
AT1G15520	5.44818	2.44577	up	4.46347	2.15817	up	2.28549	1.1925	up	-2.46925	-1.30407	down	ABCG40	ABC transporter G family member 40 [Source:EMBL;Acc:AEE29332.1]	AT1G15520 AT1G15520.1 ABC transporter family involved in ABA transport and resistance to lead. Localizes to plasma membrane. Upregulated by lead. Expressed in leaves, flowers, stomata and roots. protein_coding ATP-BINDING CASSETTE G40 (ABCG40) PLEIOTROPIC DRUG RESISTANCE 12 (PDR12);ARABIDOPSIS THALIANA ATP-BINDING CASSETTE G40 (ATABCG40);ATP-BINDING CASSETTE G40 (ABCG40);PLEIOTROPIC DRUG RESISTAN…
AT1G23201	4.76646	2.25292	up	4.44335	2.15165	up	1.74157	0.800391	up	1.61462	0.691199	up	AT1G23201	uncharacterized protein [Source:EMBL;Acc:AEE30355.1]	AT1G23201 AT1G23201.1 GCK domain protein;(source:Araport11) protein_coding
AT4G16600	2.53851	1.34398	up	4.44192	2.15118	up	1.77719	0.829598	up	2.2372	1.1617	up	AT4G16600	GT8-glycogenin domain-containing protein [Source:EMBL;Acc:AEE83775.1]	AT4G16600 AT4G16600.1 Nucleotide-diphospho-sugar transferases superfamily protein;(source:Araport11) protein_coding PLANT GLYCOGENIN-LIKE STARCH INITIATION PROTEIN 8 (PGSIP8) PLANT GLYCOGENIN-LIKE STARCH INITIATION PROTEIN 8 (PGSIP8)
AT1G71890	2.72185	1.44459	up	4.39833	2.13696	up	4.63868	2.21371	up	6.71092	2.74651	up	SUC5	sucrose transport protein SUC5 [Source:EMBL;Acc:AEE35248.1]	AT1G71890 AT1G71890.1 Encodes a sucrose transporter that is expressed in the endosperm. Mutants have delayed accumulation of fatty acids and embryo maturation. protein_coding (SUC5) SUCROSE-PROTON SYMPORTER 5 (ATSUC5); (SUC5)
AT5G60250	3.21633	1.68542	up	4.39828	2.13694	up	-1.41835	-0.504216	down	1.92365	0.943844	up	AT5G60250	C3H4 type zinc finger protein [Source:EMBL;Acc:AED97299.1]	AT5G60250 AT5G60250.1 zinc finger (C3HC4-type RING finger) family protein;(source:Araport11) protein_coding
AT5G11930	3.09172	1.62841	up	4.39525	2.13594	up	4.1643	2.05807	up	4.50113	2.17029	up	AT5G11930	glutaredoxin-C10 [Source:EMBL;Acc:AED91741.1]	AT5G11930 AT5G11930.1 Thioredoxin superfamily protein;(source:Araport11) protein_coding
AT4G28811	2.69839	1.4321	up	4.39311	2.13524	up	1.20753	0.272054	up	1.07995	0.110966	up	AT4G28811	transcription factor bHLH119 [Source:EMBL;Acc:AEE85547.1]	AT4G28811 AT4G28811.1 basic helix-loop-helix (bHLH) DNA-binding superfamily protein;(source:Araport11) protein_coding
AT3G23010	9.1265	3.19006	up	4.35989	2.12429	up	4.7712	2.25435	up	4.86513	2.28248	up	AtRLP36	receptor like protein 36 [Source:EMBL;Acc:AEE76705.1]	AT3G23010 AT3G23010.1 receptor like protein 36;(source:Araport11) protein_coding RECEPTOR LIKE PROTEIN 36 (RLP36) RECEPTOR LIKE PROTEIN 36 (RLP36);RECEPTOR LIKE PROTEIN 36 (AtRLP36)
AT4G18350	5.00959	2.32469	up	4.35276	2.12193	up	2.11814	1.0828	up	1.67439	0.743638	up	NCED2	9-cis-epoxycarotenoid dioxygenase NCED2 [Source:EMBL;Acc:AEE84030.1]	AT4G18350 AT4G18350.1 Encodes 9-<i>cis</i>-epoxycarotenoid dioxygenase, a key enzyme in the biosynthesis of abscisic acid. The expression of this gene declines during the first 12h of imbibition. protein_coding NINE-CIS-EPOXYCAROTENOID DIOXYGENASE 2 (NCED2) NINE-CIS-EPOXYCAROTENOID DIOXYGENASE 2 (ATNCED2);NINE-CIS-EPOXYCAROTENOID DIOXYGENASE 2 (NCED2)
AT5G09710	2.73422	1.45113	up	4.33854	2.11721	up	4.04552	2.01633	up	5.0302	2.33061	up	AT5G09710	putative magnesium transporter MRS2-9 [Source:EMBL;Acc:AED91436.1]	AT5G09710 AT5G09710.1 Magnesium transporter CorA-like family protein;(source:Araport11) pseudogene
AT4G23140	3.10159	1.63301	up	4.33277	2.11529	up	7.23829	2.85565	up	5.10102	2.35079	up	CRK6	cysteine-rich receptor-like protein kinase 6 [Source:EMBL;Acc:AEE84714.1]	AT4G23140 AT4G23140.2 Arabidopsis thaliana receptor-like protein kinase. Naming convention from Chen et al 2003 (PMID 14756307) protein_coding CYSTEINE-RICH RLK (RECEPTOR-LIKE PROTEIN KINASE) 6 (CRK6) CYSTEINE-RICH RLK (RECEPTOR-LIKE PROTEIN KINASE) 6 (CRK6)
AT5G43570	5.36348	2.42317	up	4.33256	2.11522	up	-1.12258	-0.166812	down	-1.00494	-0.00710821	down	AT5G43570	Serine protease inhibitor, potato inhibitor I-type family protein [Source:EMBL;Acc:AED94983.1]	AT5G43570 AT5G43570.1 Predicted to encode a PR (pathogenesis-related) peptide that belongs to the PR-6 proteinase inhibitor family. Six putative PR-6-type protein encoding genes are found in Arabidopsis: At2g38900, At2g38870, At5g43570, At5g43580, At3g50020 and At3g46860. protein_coding
AT3G50470	4.0475	2.01703	up	4.29385	2.10227	up	3.84989	1.94482	up	5.67406	2.50438	up	HR3	RPW8-like protein 3 [Source:EMBL;Acc:AEE78670.1]	AT3G50470 AT3G50470.1 Homolog of RPW8 protein_coding HOMOLOG OF RPW8 3 (HR3) INTRACELLULAR MILDEW A 10 (MLA10);HOMOLOG OF RPW8 3 (HR3)
AT2G29470	6.64175	2.73156	up	4.28617	2.09969	up	1.5131	0.597505	up	2.61876	1.38889	up	ATGSTU3	glutathione S-transferase tau 3 [Source:EMBL;Acc:AEC08258.1]	AT2G29470 AT2G29470.1 Encodes glutathione transferase belonging to the tau class of GSTs. Naming convention according to Wagner et al. (2002). protein_coding GLUTATHIONE S-TRANSFERASE TAU 3 (GSTU3) GLUTATHIONE S-TRANSFERASE TAU 3 (GSTU3);GLUTATHIONE S-TRANSFERASE 21 (GST21);GLUTATHIONE S-TRANSFERASE TAU 3 (ATGSTU3)
AT1G03400	3.85269	1.94587	up	4.28212	2.09832	up	3.57656	1.83857	up	3.96855	1.98861	up	AT1G03400	putative 1-aminocyclopropane-1-carboxylate oxidase [Source:EMBL;Acc:AEE27568.1]	AT1G03400 AT1G03400.1 A single copy gene that encodes a protein with sequence similarity to tomato E8 (ACC oxidase, the last step in ethylene biosynthesis) involved in ethylene synthesis and fruit ripening in tomato. This gene is not induced by ethylene in siliques. The transcript is found in siliques, etiolated seedlings, leaves, stems and flowers. protein_coding
AT3G24900	3.78663	1.92091	up	4.27582	2.0962	up	2.39251	1.25852	up	1.87278	0.90518	up	AtRLP39	receptor like protein 39 [Source:EMBL;Acc:AEE76960.1]	AT3G24900 AT3G24900.1 receptor like protein 39;(source:Araport11) protein_coding RECEPTOR LIKE PROTEIN 39 (RLP39) RECEPTOR LIKE PROTEIN 39 (RLP39);RECEPTOR LIKE PROTEIN 39 (AtRLP39)
AT2G30680	2.5655	1.35924	up	4.25361	2.08869	up	2.84702	1.50945	up	3.66718	1.87467	up	AT2G30680	uncharacterized protein [Source:EMBL;Acc:AEC08426.1]	AT2G30680 AT2G30680.1 callose synthase-like protein;(source:Araport11) protein_coding
AT5G11400	-1	0	down	4.25361	2.08869	up	-1	0	down	4.25361	2.08869	up	AT5G11400	protein kinase family protein [Source:EMBL;Acc:AED91672.1]	AT5G11400 AT5G11400.2 Protein kinase superfamily protein;(source:Araport11) protein_coding
AT5G44820	2.22513	1.15389	up	4.24756	2.08663	up	3.62446	1.85777	up	3.87048	1.95251	up	AT5G44820	Nucleotide-diphospho-sugar transferase family protein [Source:EMBL;Acc:AED95165.1]	AT5G44820 AT5G44820.1 Nucleotide-diphospho-sugar transferase family protein;(source:Araport11) protein_coding
AT1G58300	11.1413	3.47785	up	4.24406	2.08544	up	11.1413	3.47785	up	16.1897	4.01701	up	HO4	heme oxygenase 4 [Source:EMBL;Acc:AEE33533.1]	AT1G58300 AT1G58300.1 Encodes a member (HO4) of the heme oxygenase family. protein_coding HEME OXYGENASE 4 (ho4) HEME OXYGENASE 4 (ho4)
AT5G18270	2.93725	1.55446	up	4.21725	2.0763	up	-1.14411	-0.194229	down	1.1909	0.252048	up	ANAC087	NAC domain containing protein 87 [Source:EMBL;Acc:AED92531.1]	AT5G18270 AT5G18270.1 NAC domain containing protein 87;(source:Araport11) protein_coding ARABIDOPSIS NAC DOMAIN CONTAINING PROTEIN 87 (ANAC087) ARABIDOPSIS NAC DOMAIN CONTAINING PROTEIN 87 (ANAC087)
AT2G15040	4.27881	2.09721	up	4.21134	2.07428	up	2.14216	1.09907	up	2.21493	1.14726	up	AtRLP18	pseudogene.[Source:TAIR;Acc:AT2G15040]	AT2G15040 AT2G15040.1 pseudogene of receptor like protein 53;(source:Araport11) pseudogene RECEPTOR LIKE PROTEIN 18 (RLP18) RECEPTOR LIKE PROTEIN 18 (RLP18);RECEPTOR LIKE PROTEIN 18 (AtRLP18)
AT3G05770	1.88577	0.915151	up	4.18778	2.06619	up	-3.80558	-1.92812	down	-2.7281	-1.4479	down	AT3G05770	uncharacterized protein [Source:EMBL;Acc:AEE74295.1]	AT3G05770 AT3G05770.1 hypothetical protein;(source:Araport11) protein_coding
AT3G51340	2.69359	1.42953	up	4.1831	2.06457	up	3.2565	1.70332	up	2.89043	1.53128	up	AT3G51340	aspartyl protease family protein [Source:EMBL;Acc:AEE78781.1]	AT3G51340 AT3G51340.1 Eukaryotic aspartyl protease family protein;(source:Araport11) protein_coding
AT5G45110	3.84595	1.94334	up	4.1725	2.06091	up	2.05565	1.0396	up	2.57225	1.36303	up	NPR3	NPR1-like protein 3 [Source:EMBL;Acc:AED95205.1]	AT5G45110 AT5G45110.1 Encodes NPR3, a paralog of NPR1. Involved in negative regulation of defense responses against bacterial and oomycete pathogens. npr3 mutants has elevated level of PR1 expression. Interacts with TGA2, TGA3, TGA5 and TGA6 in yeast two hybrid assays. NPR3 and NPR4 are receptors for the immune signal salicylic acid. The mRNA is cell-to-cell mobile. protein_coding NPR1-LIKE PROTE…
AT1G60750	17.7648	4.15095	up	4.17174	2.06065	up	-1.41967	-0.505551	down	-2.92172	-1.54682	down	AT1G60750	auxin-induced atb2-like protein [Source:EMBL;Acc:AEE33728.1]	AT1G60750 AT1G60750.1 NAD(P)-linked oxidoreductase superfamily protein;(source:Araport11) protein_coding
AT4G32870	2.48884	1.31547	up	4.15054	2.0533	up	2.86057	1.51631	up	4.93686	2.30359	up	AT4G32870	SRPBCC ligand-binding domain-containing protein [Source:EMBL;Acc:AEE86137.1]	AT4G32870 AT4G32870.1 Polyketide cyclase/dehydrase and lipid transport superfamily protein;(source:Araport11) protein_coding
AT3G20360	2.13337	1.09313	up	4.14872	2.05267	up	2.79311	1.48187	up	2.30255	1.20323	up	AT3G20360	TRAF-like family protein [Source:EMBL;Acc:AEE76368.1]	AT3G20360 AT3G20360.1 TRAF-like family protein;(source:Araport11) protein_coding
AT3G48640	3.94983	1.98179	up	4.1413	2.05008	up	4.0633	2.02265	up	5.53976	2.46982	up	AT3G48640	uncharacterized protein [Source:EMBL;Acc:AEE78440.1]	AT3G48640 AT3G48640.1 transmembrane protein;(source:Araport11) protein_coding
AT5G60408	-1	0	down	4.13805	2.04895	up	-1	0	down	4.13805	2.04895	up	MIR391	MIR391 miRNA.[Source:TAIR;Acc:AT5G60408]	AT5G60408 AT5G60408.1 Encodes a microRNA of the miR390 family with unknown function. MicroRNAs are regulatory RNAs with a mature length of ~21-nucleotides that are processed from hairpin precursors by Dicer-like enzymes. MicroRNAs can negatively regulate gene expression by attenuating translation or by directing mRNA cleavage.Mature sequence: UUCGCAGGAGAGAUAGCGCCA miRNA_primary_transcript MICRORN…
AT5G39090	2.81698	1.49415	up	4.13451	2.04772	up	1.18343	0.242969	up	1.81668	0.861307	up	AT5G39090	HXXXD-type acyl-transferase-like protein [Source:EMBL;Acc:AED94393.1]	AT5G39090 AT5G39090.1 HXXXD-type acyl-transferase family protein;(source:Araport11) protein_coding
AT5G45470	3.17708	1.6677	up	4.11911	2.04233	up	5.21743	2.38334	up	4.22667	2.07952	up	AT5G45470	uncharacterized protein [Source:EMBL;Acc:AED95256.1]	AT5G45470 AT5G45470.1 transmembrane protein, putative (DUF594);(source:Araport11) protein_coding
AT3G46260	1.47268	0.558445	up	4.11699	2.04159	up	1.08549	0.11834	up	-1.03822	-0.0541078	down	AT3G46260	protein kinase-like protein [Source:EMBL;Acc:AEE78140.1]	AT3G46260 AT3G46260.1 kinase-like protein;(source:Araport11) protein_coding
AT2G30670	5.26562	2.3966	up	4.11553	2.04108	up	5.34223	2.41744	up	6.06799	2.60122	up	AT2G30670	tropine dehydrogenase [Source:EMBL;Acc:AEC08425.1]	AT2G30670 AT2G30670.1 NAD(P)-binding Rossmann-fold superfamily protein;(source:Araport11) protein_coding
AT5G43910	2.80009	1.48548	up	4.09905	2.03529	up	2.97801	1.57435	up	3.22979	1.69144	up	AT5G43910	pfkB-like carbohydrate kinase family protein [Source:EMBL;Acc:AED95027.1]	AT5G43910 AT5G43910.2 pfkB-like carbohydrate kinase family protein;(source:Araport11) protein_coding
AT4G33070	4.79035	2.26013	up	4.09896	2.03526	up	-2.56625	-1.35966	down	-1.38447	-0.469329	down	AT4G33070	pyruvate decarboxylase [Source:EMBL;Acc:AEE86169.1]	AT4G33070 AT4G33070.1 Thiamine pyrophosphate dependent pyruvate decarboxylase family protein;(source:Araport11) protein_coding PYRUVATE DECARBOXYLASE 1 (PDC1) (ATPDC1);PYRUVATE DECARBOXYLASE 1 (PDC1)
AT3G09010	2.86464	1.51835	up	4.09694	2.03455	up	1.58109	0.66092	up	1.67505	0.744204	up	AT3G09010	protein kinase domain-containing protein [Source:EMBL;Acc:AEE74708.1]	AT3G09010 AT3G09010.1 Protein kinase superfamily protein;(source:Araport11) protein_coding
AT4G13900	5.59225	2.48343	up	4.09268	2.03305	up	5.60883	2.4877	up	3.77607	1.91688	up	AtRLP49		AT4G13900 AT4G13900.1 pseudogene of receptor like protein 47;(source:Araport11) pseudogene RECEPTOR LIKE PROTEIN 49 (RLP49) RECEPTOR LIKE PROTEIN 49 (RLP49);RECEPTOR LIKE PROTEIN 49 (AtRLP49)
AT1G32350	6.27067	2.64862	up	4.08524	2.03042	up	1.77429	0.827242	up	-1.16221	-0.216869	down	AOX1D	alternative oxidase 3 [Source:EMBL;Acc:AEE31467.1]	AT1G32350 AT1G32350.1 alternative oxidase 1D;(source:Araport11) protein_coding ALTERNATIVE OXIDASE 1D (AOX1D) ALTERNATIVE OXIDASE 1D (AOX1D)
AT4G25070	2.77811	1.4741	up	4.0544	2.01949	up	5.55852	2.4747	up	5.2066	2.38034	up	AT4G25070	uncharacterized protein [Source:EMBL;Acc:AEE84998.1]	AT4G25070 AT4G25070.2 caldesmon-like protein;(source:Araport11) protein_coding
AT5G14760	3.37287	1.75397	up	4.0456	2.01635	up	2.10999	1.07723	up	1.70862	0.772832	up	AO	L-aspartate oxidase [Source:EMBL;Acc:AED92074.1]	AT5G14760 AT5G14760.1 At5g14760 encodes for L-aspartate oxidase involved in the early steps of NAD biosynthesis. In contrary to the EC 1.4.3.16 (l-aspartate oxidase - deaminating) the enzyme catalyzes the reaction L-aspartate + O2 = iminoaspartate (alpha-iminosuccinate) + H2O2 protein_coding L-ASPARTATE OXIDASE (AO) FLAGELLIN-INSENSITIVE 4 (FIN4);L-ASPARTATE OXIDASE (AO)
AT5G11180	7.03782	2.81513	up	4.04373	2.01569	up	1.92861	0.947565	up	1.0967	0.133164	up	GLR2.6	glutamate receptor 2.6 [Source:EMBL;Acc:AED91643.1]	AT5G11180 AT5G11180.1 member of Putative ligand-gated ion channel subunit family protein_coding GLUTAMATE RECEPTOR 2.6 (GLR2.6) ARABIDOPSIS THALIANA GLUTAMATE RECEPTOR 2.6 (ATGLR2.6);GLUTAMATE RECEPTOR 2.6 (GLR2.6)
AT4G28790	2.7336	1.4508	up	4.04002	2.01436	up	-1.06002	-0.0840907	down	1.5962	0.674637	up	AT4G28790	transcription factor bHLH23 [Source:EMBL;Acc:AEE85544.1]	AT4G28790 AT4G28790.1 basic helix-loop-helix (bHLH) DNA-binding superfamily protein;(source:Araport11) protein_coding
AT3G45130	3.13339	1.64772	up	4.02117	2.00761	up	2.23526	1.16044	up	2.85848	1.51525	up	LAS1	lanosterol synthase 1 [Source:EMBL;Acc:AEE77996.1]	AT3G45130 AT3G45130.1 lanosterol synthase 1;(source:Araport11) protein_coding LANOSTEROL SYNTHASE 1 (LAS1) LANOSTEROL SYNTHASE 1 (LAS1)
AT1G06135	6.17461	2.62635	up	3.97288	1.99018	up	1.59529	0.673821	up	1.46226	0.548201	up	AT1G06135	uncharacterized protein [Source:EMBL;Acc:AEE27944.1]	AT1G06135 AT1G06135.1 transmembrane protein;(source:Araport11) protein_coding
AT1G17744	2.87631	1.52422	up	3.97195	1.98985	up	-1.60852	-0.685734	down	-1.2755	-0.351064	down	AT1G17744	uncharacterized protein [Source:EMBL;Acc:AEE29629.1]	AT1G17744 AT1G17744.1 hypothetical protein;(source:Araport11) protein_coding
AT5G44920	3.53104	1.82009	up	3.94981	1.98178	up	2.91954	1.54574	up	4.81259	2.26681	up	AT5G44920	Toll-Interleukin-Resistance domain-containing protein [Source:EMBL;Acc:AED95175.1]	AT5G44920 AT5G44920.1 Encodes a KASH domain protein that localizes to the nuclear envelope and affects nuclear morphology. protein_coding TIR-KASH PROTEIN (TIK) (ATTIK);TIR-KASH PROTEIN (TIK)
AT4G26930	5.13094	2.35922	up	3.93357	1.97584	up	-1.0426	-0.0601898	down	-1.34875	-0.43162	down	AtMYB97	myb domain protein 97 [Source:EMBL;Acc:AEE85271.1]	AT4G26930 AT4G26930.1 Encodes a putative transcription factor (MYB97). protein_coding MYB DOMAIN PROTEIN 97 (MYB97) MYB DOMAIN PROTEIN 97 (MYB97);MYB DOMAIN PROTEIN 97 (AtMYB97)
AT1G19530	4.87837	2.2864	up	3.92945	1.97433	up	-2.08885	-1.06271	down	-1.79932	-0.847448	down	AT1G19530	uncharacterized protein [Source:EMBL;Acc:AEE29865.1]	AT1G19530 AT1G19530.1 DNA polymerase epsilon catalytic subunit A;(source:Araport11) protein_coding
AT3G19920	3.16036	1.66009	up	3.92492	1.97266	up	-4.70784	-2.23507	down	-5.44817	-2.44577	down	AT3G19920	uncharacterized protein [Source:EMBL;Acc:AEE76308.1]	AT3G19920 AT3G19920.1 BTB/POZ domain protein;(source:Araport11) protein_coding
AT1G60110	2.16655	1.1154	up	3.91281	1.96821	up	2.4438	1.28912	up	2.35937	1.2384	up	AT1G60110	jacalin-like lectin domain-containing protein [Source:EMBL;Acc:AEE33660.1]	AT1G60110 AT1G60110.1 Mannose-binding lectin superfamily protein;(source:Araport11) protein_coding
AT4G26070	3.31952	1.73097	up	3.90151	1.96403	up	3.18474	1.67117	up	3.91729	1.96985	up	NMAPKK	mitogen-activated protein kinase kinase 1 [Source:EMBL;Acc:AEE85152.1]	AT4G26070 AT4G26070.2 Member of MAP Kinase Kinase. Likely functions in a stress-activated MAPK pathway. Can phosphorylate the MAPK AtMPK4, in response to stress. Gets phosphorylated by MEKK1 in response to wounding. protein_coding MAP KINASE/ ERK KINASE 1 (MEK1) MAP KINASE/ ERK KINASE 1 (MEK1);MITOGEN ACTIVATED PROTEIN KINASE KINASE 1 (MKK1); (ATMEK1); (NMAPKK)
AT4G18250	2.5261	1.33691	up	3.88677	1.95857	up	3.27528	1.71162	up	2.58956	1.37271	up	AT4G18250	putative receptor serine/threonine kinase [Source:EMBL;Acc:AEE84016.1]	AT4G18250 AT4G18250.1 receptor Serine/Threonine kinase-like protein;(source:Araport11) protein_coding
AT1G10340	1.9702	0.978339	up	3.88455	1.95775	up	3.29343	1.71959	up	4.87296	2.2848	up	AT1G10340	ankyrin repeat-containing protein [Source:EMBL;Acc:AEE28567.1]	AT1G10340 AT1G10340.1 Ankyrin repeat family protein;(source:Araport11) protein_coding
AT5G43120	2.54407	1.34714	up	3.88153	1.95663	up	3.27334	1.71076	up	4.10766	2.03832	up	AT5G43120	ARM-repeat/tetratricopeptide repeat-like protein [Source:EMBL;Acc:AED94912.1]	AT5G43120 AT5G43120.1 ARM-repeat/Tetratricopeptide repeat (TPR)-like protein;(source:Araport11) protein_coding
AT3G19615	5.65963	2.50071	up	3.88076	1.95634	up	-1.2157	-0.281793	down	1.06712	0.0937219	up	AT3G19615	uncharacterized protein [Source:EMBL;Acc:AEE76267.1]	AT3G19615 AT3G19615.1 beta-1,4-xylosidase;(source:Araport11) protein_coding
AT1G02360	1.91574	0.937901	up	3.87743	1.9551	up	3.07736	1.62169	up	4.07197	2.02573	up	AT1G02360	putative chitinase [Source:EMBL;Acc:AEE27420.1]	AT1G02360 AT1G02360.1 Chitinase family protein;(source:Araport11) protein_coding
AT1G12805	1.17437	0.231893	up	3.8772	1.95501	up	-3.99363	-1.9977	down	1.97103	0.978953	up	AT1G12805	nucleotide binding protein [Source:EMBL;Acc:AEE28931.1]	AT1G12805 AT1G12805.1 nucleotide binding protein;(source:Araport11) protein_coding
AT3G29250	2.32187	1.21529	up	3.86928	1.95207	up	3.2936	1.71967	up	3.50598	1.80982	up	AT3G29250	Rossmann-fold NAD(P)-binding domain-containing protein [Source:EMBL;Acc:AEE77557.1]	AT3G29250 AT3G29250.1 NAD(P)-binding Rossmann-fold superfamily protein;(source:Araport11) protein_coding SHORT-CHAIN DEHYDROGENASE REDUCTASE 4 (SDR4) (ATSDR4);SHORT-CHAIN DEHYDROGENASE REDUCTASE 4 (SDR4)
AT5G66670	7.42787	2.89295	up	3.85538	1.94687	up	6.64156	2.73152	up	5.61033	2.48808	up	AT5G66670	uncharacterized protein [Source:EMBL;Acc:AED98249.1]	AT5G66670 AT5G66670.1 pectinesterase, putative (DUF677);(source:Araport11) protein_coding
AT1G74440	3.46108	1.79122	up	3.81504	1.9317	up	7.28233	2.8644	up	8.16126	3.02879	up	AT1G74440	uncharacterized protein [Source:EMBL;Acc:AEE35592.1]	AT1G74440 AT1G74440.1 ER membrane protein, putative (DUF962);(source:Araport11) protein_coding
AT2G21910	8.37355	3.06584	up	3.80454	1.92772	up	10.7784	3.43007	up	3.80454	1.92772	up	CYP96A5	cytochrome P450, family 96, subfamily A, polypeptide 5 [Source:EMBL;Acc:AEC07237.1]	AT2G21910 AT2G21910.1 member of CYP96A protein_coding "CYTOCHROME P450, FAMILY 96, SUBFAMILY A, POLYPEPTIDE 5" (CYP96A5) "CYTOCHROME P450, FAMILY 96, SUBFAMILY A, POLYPEPTIDE 5" (CYP96A5)
AT1G28300	1.61066	0.687655	up	3.80454	1.92772	up	1.61066	0.687655	up	3.80454	1.92772	up	LEC2	B3 domain-containing transcription factor LEC2 [Source:EMBL;Acc:AEE30945.1]	AT1G28300 AT1G28300.1 Transcription factor that contains a B3 domain, a DNA-binding motif unique to plants and characteristic of several transcription factors. Plays critical roles both early and late during embryo development. LEC2 RNA accumulates primarily during seed development. LEC2 is required for the maintenance of suspensor morphology, specification of cotyledon identity, progression thro…
AT4G10250	18.7268	4.22703	up	3.79273	1.92324	up	-1.23127	-0.300149	down	-2.53778	-1.34357	down	ATHSP22.0	heat shock protein 22 [Source:EMBL;Acc:AEE82859.1]	AT4G10250 AT4G10250.1 Columbia endomembrane-localized small heat shock protein protein_coding (ATHSP22.0) (ATHSP22.0)
AT1G17600	2.94662	1.55906	up	3.79127	1.92268	up	3.71322	1.89267	up	3.53612	1.82217	up	AT1G17600	TIR-NBS-LRR class disease resistance protein [Source:EMBL;Acc:AEE29612.1]	AT1G17600 AT1G17600.1 SOC3 is a TIR-NB-leucine-rich repeat (TNL) protein.Mutants suppress loss of chs2 phenotype of auto-activation of immunity. When the TIR domain of SOC3 interacts with CHS2 the binding results in temperature activation of cell death, the suppressors inhibit this interaction. protein_coding (SOC3) (SOC3)
AT3G51330	3.12856	1.6455	up	3.77746	1.91742	up	5.25084	2.39255	up	4.23449	2.08219	up	AT3G51330	aspartyl protease family protein [Source:EMBL;Acc:AEE78780.1]	AT3G51330 AT3G51330.1 Eukaryotic aspartyl protease family protein;(source:Araport11) protein_coding
AT4G23170	3.68032	1.87983	up	3.76632	1.91316	up	4.88397	2.28805	up	4.21036	2.07394	up	EP1	putative cysteine-rich receptor-like protein kinase 9 [Source:EMBL;Acc:AEE84718.1]	AT4G23170 AT4G23170.1 Induced in response to Salicylic acid.Similar to receptor-like kinase 4 and 5. NPR1, a known positive regulator of the SA signaling pathway is responsible for the SA-dependent induction and constitutive repression of EP1 gene's basal expression. The mRNA is cell-to-cell mobile. protein_coding (EP1) CYSTEINE-RICH RLK (RECEPTOR-LIKE PROTEIN KINASE) 9 (CRK9); (EP1)
AT5G54165	4.11514	2.04094	up	3.76526	1.91275	up	-1.21168	-0.277005	down	-1.08263	-0.114547	down	AT5G54165	uncharacterized protein [Source:EMBL;Acc:AED96461.1]	AT5G54165 AT5G54165.1 Avr9/Cf-9 rapidly elicited protein;(source:Araport11) protein_coding
AT3G09490	2.51465	1.33036	up	3.7636	1.91211	up	2.71751	1.44229	up	2.90532	1.5387	up	AT3G09490	tetratricopeptide repeat domain-containing protein [Source:EMBL;Acc:AEE74773.1]	AT3G09490 AT3G09490.1 Tetratricopeptide repeat (TPR)-like superfamily protein;(source:Araport11) protein_coding
AT3G50480	1.74003	0.799112	up	3.75708	1.90961	up	2.23694	1.16153	up	3.46887	1.79446	up	HR4	RPW8-like protein 4 [Source:EMBL;Acc:AEE78671.1]	AT3G50480 AT3G50480.1 Homolog of RPW8 protein_coding HOMOLOG OF RPW8 4 (HR4) HOMOLOG OF RPW8 4 (HR4)
AT1G16030	5.2051	2.37993	up	3.74532	1.90509	up	-1.14	-0.189034	down	-1.84267	-0.881794	down	Hsp70b	heat shock protein 70B [Source:EMBL;Acc:AEE29402.1]	AT1G16030 AT1G16030.1 heat shock protein 70B;(source:Araport11) protein_coding HEAT SHOCK PROTEIN 70B (Hsp70b) HEAT SHOCK PROTEIN 70B (Hsp70b)
AT5G48400	2.14858	1.10338	up	3.73555	1.90132	up	-1.43427	-0.52032	down	-2.90525	-1.53866	down	ATGLR1.2	glutamate receptor 1.2 [Source:EMBL;Acc:AED95665.1]	AT5G48400 AT5G48400.2 member of Putative ligand-gated ion channel subunit family protein_coding (ATGLR1.2) GLUTAMATE RECEPTOR 1.2 (GLR1.2); (ATGLR1.2)
AT1G63530	2.56336	1.35803	up	3.73385	1.90067	up	-1.70152	-0.766823	down	-1.2618	-0.335478	down	AT1G63530	uncharacterized protein [Source:EMBL;Acc:AEE34109.1]	AT1G63530 AT1G63530.1 hypothetical protein;(source:Araport11) protein_coding
AT1G78410	1.69287	0.759468	up	3.72894	1.89877	up	-1.33864	-0.420767	down	-1.06245	-0.0873902	down	AT1G78410	VQ motif-containing protein [Source:EMBL;Acc:AEE36102.1]	AT1G78410 AT1G78410.1 VQ motif-containing protein;(source:Araport11) protein_coding
AT2G37820	3.26715	1.70803	up	3.7279	1.89836	up	15.757	3.97793	up	7.48066	2.90317	up	AT2G37820	cysteine/histidine-rich C1 domain-containing protein [Source:EMBL;Acc:AEC09454.1]	AT2G37820 AT2G37820.1 Cysteine/Histidine-rich C1 domain family protein;(source:Araport11) protein_coding
AT3G50280	2.91332	1.54267	up	3.68534	1.8818	up	4.7214	2.23922	up	5.49515	2.45816	up	AT3G50280	uncharacterized acetyltransferase [Source:EMBL;Acc:AEE78648.1]	AT3G50280 AT3G50280.1 HXXXD-type acyl-transferase family protein;(source:Araport11) protein_coding
AT4G37710	5.54859	2.47212	up	3.68132	1.88022	up	4.31336	2.10881	up	2.86178	1.51691	up	AT4G37710	VQ motif-containing protein [Source:EMBL;Acc:AEE86830.1]	AT4G37710 AT4G37710.1 VQ motif-containing protein;(source:Araport11) protein_coding VQ MOTIF-CONTAINING PROTEIN 29 (VQ29) VQ MOTIF-CONTAINING PROTEIN 29 (VQ29)
AT3G60170	-1.11639	-0.158846	down	3.67448	1.87754	up	31.9642	4.99839	up	4.79412	2.26127	up	AT3G60170	transposable element gene.[Source:TAIR;Acc:AT3G60170]	AT3G60170 AT3G60170.1 transposable_element_gene;(source:Araport11);copia-like retrotransposon family, has a 7.6e-229 P-value blast match to gb|AAO73527.1| gag-pol polyprotein (Glycine max) (SIRE1) (Ty1_Copia-family);(source:TAIR10) transposable_element_gene
AT1G66780	2.35708	1.237	up	3.67355	1.87717	up	1.60214	0.680001	up	1.55653	0.638336	up	AT1G66780	MATE efflux family protein [Source:EMBL;Acc:AEE34555.1]	AT1G66780 AT1G66780.1 MATE efflux family protein;(source:Araport11) protein_coding
AT5G45500	2.95164	1.56152	up	3.67266	1.87683	up	3.67818	1.87899	up	3.33209	1.73643	up	AT5G45500	RNI-like superfamily protein [Source:EMBL;Acc:AED95261.1]	AT5G45500 AT5G45500.1 RNI-like superfamily protein;(source:Araport11) protein_coding
AT4G25110	2.37832	1.24994	up	3.67055	1.876	up	3.31837	1.73047	up	3.42169	1.77471	up	AtMC2	metacaspase 2 [Source:EMBL;Acc:AEE85012.1]	AT4G25110 AT4G25110.1 Encodes a type I metacaspase. Two Arabidopsis metacaspases, AT1G02170 (MC1) and AT4G25110 (MC2) antagonistically control programmed cell death in Arabidopsis. MC1 is a positive regulator of cell death and requires conserved caspase-like putative catalytic residues for its function. MC2 negatively regulates cell death. This function is independent of the putative catalytic re…
AT5G46960	4.63114	2.21137	up	3.6677	1.87488	up	4.63114	2.21137	up	5.49138	2.45717	up	AT5G46960	plant invertase/pectin methylesterase inhibitor domain-containing protein [Source:EMBL;Acc:AED95452.1]	AT5G46960 AT5G46960.1 Pectin methylesterase inhibitor that is involved in resistance to Botrytis cinerea. Affects PME activity during infection to prevent disease. protein_coding (ATPMEI12) (ATPMEI12)
AT5G11210	2.97076	1.57083	up	3.66346	1.87321	up	2.10171	1.07157	up	2.09448	1.06659	up	GLR2.5	glutamate receptor 2.5 [Source:EMBL;Acc:AED91648.1]	AT5G11210 AT5G11210.1 member of Putative ligand-gated ion channel subunit family protein_coding GLUTAMATE RECEPTOR 2.5 (GLR2.5) ARABIDOPSIS THALIANA GLU (ATGLR2.5);GLUTAMATE RECEPTOR 2.5 (GLR2.5)
AT2G47130	2.42931	1.28055	up	3.66257	1.87286	up	2.30298	1.2035	up	2.68395	1.42436	up	AT2G47130	Rossmann-fold NAD(P)-binding domain-containing protein [Source:EMBL;Acc:AEC10805.1]	AT2G47130 AT2G47130.1 Encodes a short-chain dehydrogenase/reductase that is not involved in ABA biosynthesis but plays an important role in plant defense response to bacteria. protein_coding SHORT-CHAIN DEHYDROGENASE/REDUCTASE 2 (SDR3) (ATSDR3);SHORT-CHAIN DEHYDROGENASE/REDUCTASE 2 (SDR3)
AT3G07380	3.52024	1.81568	up	3.66153	1.87245	up	5.24825	2.39184	up	5.53645	2.46896	up	AT3G07380	uncharacterized protein [Source:EMBL;Acc:AEE74536.1]	AT3G07380 AT3G07380.1 glycosyltransferase family protein (DUF23);(source:Araport11) protein_coding
AT4G17670	1.08111	0.112516	up	3.65773	1.87095	up	1.17757	0.235818	up	2.02939	1.02104	up	AT4G17670	uncharacterized protein [Source:EMBL;Acc:AEE83931.1]	AT4G17670 AT4G17670.1 senescence-associated family protein (DUF581);(source:Araport11) protein_coding
AT1G61800	3.73559	1.90133	up	3.64764	1.86696	up	1.5938	0.672475	up	-1.43967	-0.525734	down	GPT2	glucose-6-phosphate/phosphate translocator 2 [Source:EMBL;Acc:AEE33888.1]	AT1G61800 AT1G61800.1 glucose6-Phosphate/phosphate transporter 2. Expression is upregulated in the shoot of cax1/cax3 mutant. The mRNA is cell-to-cell mobile. protein_coding GLUCOSE-6-PHOSPHATE/PHOSPHATE TRANSLOCATOR 2 (GPT2) GLUCOSE-6-PHOSPHATE/PHOSPHATE TRANSLOCATOR 2 (GPT2);ARABIDOPSIS GLUCOSE-6-PHOSPHATE/PHOSPHATE TRANSLOCATOR 2 (ATGPT2)
AT4G35660	3.15282	1.65664	up	3.64178	1.86464	up	1.16663	0.222348	up	1.00102	0.00146949	up	AT4G35660	uncharacterized protein [Source:EMBL;Acc:AEE86546.1]	AT4G35660 AT4G35660.1 selection/upkeep of intraepithelial T-cells protein, putative (DUF241);(source:Araport11) protein_coding
AT4G19395	1.79941	0.847524	up	3.63458	1.86179	up	1.64281	0.716165	up	2.4685	1.30364	up	MIR168A	MIR168/MIR168A miRNA.[Source:TAIR;Acc:AT4G19395]	AT4G19395 AT4G19395.1 Encodes a microRNA that targets AGO1. MicroRNAs are regulatory RNAs with a mature length of ~21-nucleotides that are processed from hairpin precursors by Dicer-like enzymes. MicroRNAs can negatively regulate gene expression by attenuating translation or by directing mRNA cleavage. Mature sequence: UCGCUUGGUGCAGGUCGGGAA. MIR168a is highly expressed and predominantly produces …
AT2G04170	3.67017	1.87585	up	3.63452	1.86176	up	3.95209	1.98262	up	3.73862	1.90251	up	AT2G04170	TRAF-like family protein [Source:EMBL;Acc:AEC05806.1]	AT2G04170 AT2G04170.1 TRAF-like family protein;(source:Araport11) protein_coding
AT2G46440	2.77296	1.47143	up	3.63441	1.86172	up	2.73446	1.45125	up	2.24014	1.16359	up	ATCNGC11	cyclic nucleotide-gated ion channel 11 [Source:EMBL;Acc:AEC10696.1]	AT2G46440 AT2G46440.1 Member of Cyclic nucleotide gated channel family. Positive regulator of resistance against avirulent fungal pathogen. The mRNA is cell-to-cell mobile. protein_coding CYCLIC NUCLEOTIDE-GATED CHANNELS (CNGC11) CYCLIC NUCLEOTIDE-GATED CHANNEL 11 (ATCNGC11);CYCLIC NUCLEOTIDE-GATED CHANNELS (CNGC11);CYCLIC NUCLEOTIDE-GATED CHANNEL 11 (CNGC11)
AT3G44350	8.9505	3.16197	up	3.61718	1.85487	up	1.54753	0.629964	up	1.95118	0.964349	up	anac061	putative NAC domain-containing protein 61 [Source:EMBL;Acc:AEE77896.1]	AT3G44350 AT3G44350.2 NAC domain containing protein 61;(source:Araport11) protein_coding NAC DOMAIN CONTAINING PROTEIN 61 (NAC061) NAC DOMAIN CONTAINING PROTEIN 61 (NAC061);NAC DOMAIN CONTAINING PROTEIN 61 (anac061)
AT5G55135	-1	0	down	3.60848	1.85139	up	-1.57548	-0.655792	down	2.2904	1.1956	up	AT5G55135	uncharacterized protein [Source:EMBL;Acc:AED96590.1]	AT5G55135 AT5G55135.1 hypothetical protein;(source:Araport11) protein_coding
AT5G02780	4.91372	2.29682	up	3.60574	1.85029	up	1.63174	0.70641	up	-1.43577	-0.521822	down	GSTL1	glutathione transferase lambda 1 [Source:EMBL;Acc:AED90517.1]	AT5G02780 AT5G02780.1 Encodes a member of the lambda family of glutathione transferases. It has thiol transferase activity and self S-glutathionylation activity in vitro. protein_coding GLUTATHIONE TRANSFERASE LAMBDA 1 (GSTL1) GLUTATHIONE TRANSFERASE LAMBDA 1 (GSTL1)
AT1G29640	1.96136	0.971857	up	3.60571	1.85028	up	1.15938	0.213357	up	2.60045	1.37876	up	AT1G29640	uncharacterized protein [Source:EMBL;Acc:AEE31114.1]	AT1G29640 AT1G29640.1 senescence regulator (Protein of unknown function, DUF584);(source:Araport11) protein_coding
AT5G45510	3.33716	1.73862	up	3.6057	1.85028	up	2.97829	1.57448	up	2.35612	1.23641	up	AT5G45510	leucine-rich repeat-containing protein [Source:EMBL;Acc:AED95263.1]	AT5G45510 AT5G45510.1 Leucine-rich repeat (LRR) family protein;(source:Araport11) protein_coding
AT1G21270	3.57573	1.83824	up	3.60303	1.84921	up	4.74406	2.24612	up	3.37706	1.75577	up	WAK2	wall-associated receptor kinase 2 [Source:EMBL;Acc:AEE30080.1]	AT1G21270 AT1G21270.1 cytoplasmic serine/threonine protein kinase induced by salicylic acid. mutant plants exhibit a loss of cell expansion and dependence on sugars and salts for seedling growth, affecting the expression and activity of vacuolar invertase. protein_coding WALL-ASSOCIATED KINASE 2 (WAK2) WALL-ASSOCIATED KINASE 2 (WAK2)
AT2G30650	5.11264	2.35407	up	3.59612	1.84644	up	5.11264	2.35407	up	7.12263	2.83241	up	AT2G30650	3-hydroxyisobutyryl-CoA hydrolase [Source:EMBL;Acc:AEC08423.1]	AT2G30650 AT2G30650.1 ATP-dependent caseinolytic (Clp) protease/crotonase family protein;(source:Araport11) protein_coding
AT1G58320	3.7057	1.88975	up	3.59286	1.84513	up	-1.46713	-0.552994	down	-1.73128	-0.791838	down	AT1G58320	PLAC8 family protein [Source:EMBL;Acc:AEE33535.1]	AT1G58320 AT1G58320.1 PLAC8 family protein;(source:Araport11) protein_coding
AT4G20970	2.66642	1.4149	up	3.5877	1.84306	up	1.10044	0.138076	up	1.79428	0.843408	up	AT4G20970	basic helix-loop-helix domain-containing protein [Source:EMBL;Acc:AEE84380.1]	AT4G20970 AT4G20970.1 basic helix-loop-helix (bHLH) DNA-binding superfamily protein;(source:Araport11) protein_coding
AT3G47480	1.53906	0.622054	up	3.57916	1.83962	up	1.38633	0.471267	up	1.7547	0.811222	up	AT3G47480	putative calcium-binding protein CML47 [Source:EMBL;Acc:AEE78286.1]	AT3G47480 AT3G47480.1 Calcium-binding EF-hand family protein;(source:Araport11) protein_coding
AT2G26560	2.52789	1.33794	up	3.57011	1.83597	up	1.39588	0.481175	up	1.15914	0.213055	up	PLA IIA	phospholipase A 2A [Source:EMBL;Acc:AEC07858.1]	AT2G26560 AT2G26560.1 Encodes a lipid acyl hydrolase with wide substrate specificity that accumulates upon infection by fungal and bacterial pathogens. Protein is localized in the cytoplasm in healthy leaves, and in membranes in infected cells. Plays a role in cell death and differentially affects the accumulation of oxylipins. Contributes to resistance to virus. protein_coding PHOSPHOLIPASE A 2A…
AT5G05460	2.49652	1.31992	up	3.56114	1.83234	up	2.97545	1.57311	up	3.26319	1.70628	up	AT5G05460	mannosyl-glycoprotein endo-beta-N-acetylglucosaminidase [Source:EMBL;Acc:AED90876.1]	AT5G05460 AT5G05460.1 Encodes a cytosolic beta-endo-N-acetyglucosaminidase (ENGase). ENGases N-glycans cleave the O-glycosidic linkage between the two GlcNAc residues of the N-glycan core structure and thus generate a protein with a single GlcNAc attached to asparagine. protein_coding ENDO-BETA-N-ACETYGLUCOSAMINIDASE 85A (ENGase85A) (AtENGase85A);ENDO-BETA-N-ACETYGLUCOSAMINIDASE 85A (ENGase85A)
AT2G31020	2.82693	1.49924	up	3.54836	1.82715	up	1.29315	0.37089	up	1.16254	0.217283	up	ORP1A	oxysterol binding protein-related protein 1A [Source:EMBL;Acc:AEC08479.1]	AT2G31020 AT2G31020.1 OSBP(oxysterol binding protein)-related protein 1A;(source:Araport11) protein_coding OSBP(OXYSTEROL BINDING PROTEIN)-RELATED PROTEIN 1A (ORP1A) OSBP(OXYSTEROL BINDING PROTEIN)-RELATED PROTEIN 1A (ORP1A)
AT4G01700	1.56056	0.64206	up	3.54762	1.82685	up	1.94633	0.960755	up	1.9554	0.967463	up	AT4G01700	class II chitinase-like protein [Source:EMBL;Acc:AEE82066.1]	AT4G01700 AT4G01700.1 Chitinase family protein;(source:Araport11) protein_coding
AT2G29990	2.01393	1.01001	up	3.54247	1.82475	up	1.37392	0.458293	up	1.62216	0.697919	up	NDA2	NADH dehydrogenase [Source:EMBL;Acc:AEC08332.1]	AT2G29990 AT2G29990.1 alternative NAD(P)H dehydrogenase 2;(source:Araport11) protein_coding ALTERNATIVE NAD(P)H DEHYDROGENASE 2 (NDA2) ALTERNATIVE NAD(P)H DEHYDROGENASE 2 (NDA2)
AT5G27060	4.16463	2.05819	up	3.5413	1.82428	up	2.81111	1.49114	up	2.50398	1.32423	up	AtRLP53	receptor like protein 53 [Source:EMBL;Acc:AED93645.1]	AT5G27060 AT5G27060.1 receptor like protein 53;(source:Araport11) protein_coding RECEPTOR LIKE PROTEIN 53 (RLP53) RECEPTOR LIKE PROTEIN 53 (RLP53);RECEPTOR LIKE PROTEIN 53 (AtRLP53)
AT3G51440	2.50742	1.3262	up	3.52396	1.8172	up	1.92123	0.942031	up	2.46682	1.30265	up	AT3G51440	strictosidine synthase family protein [Source:EMBL;Acc:AEE78793.1]	AT3G51440 AT3G51440.1 Calcium-dependent phosphotriesterase superfamily protein;(source:Araport11) protein_coding
AT5G42830	1.68293	0.750974	up	3.49976	1.80726	up	1.71401	0.777377	up	2.41762	1.27359	up	AT5G42830	HXXXD-type acyl-transferase-like protein [Source:EMBL;Acc:AED94871.1]	AT5G42830 AT5G42830.1 HXXXD-type acyl-transferase family protein;(source:Araport11) protein_coding
AT5G16170	2.86782	1.51995	up	3.48367	1.80061	up	1.64833	0.721005	up	1.44499	0.53106	up	AT5G16170	Core-2/I-branching beta-1,6-N-acetylglucosaminyltransferase family protein [Source:EMBL;Acc:AED92257.1]	AT5G16170 AT5G16170.1 Core-2/I-branching beta-1,6-N-acetylglucosaminyltransferase family protein;(source:Araport11) protein_coding
AT5G52540	3.26341	1.70638	up	3.47323	1.79628	up	3.59651	1.8466	up	3.68697	1.88243	up	AT5G52540	uncharacterized protein [Source:EMBL;Acc:AED96228.1]	AT5G52540 AT5G52540.1 keratin-associated protein, putative (DUF819);(source:Araport11) protein_coding
AT2G26440	2.13911	1.09701	up	3.46948	1.79472	up	2.27208	1.18401	up	1.8667	0.900493	up	AT2G26440	pectinesterase 12 [Source:EMBL;Acc:AEC07839.1]	AT2G26440 AT2G26440.1 Plant invertase/pectin methylesterase inhibitor superfamily;(source:Araport11) protein_coding PECTIN METHYLESTERASE 12 (PME12) PECTIN METHYLESTERASE 12 (PME12)
AT2G40113	2.4933	1.31806	up	3.45779	1.78985	up	1.15909	0.212992	up	1.63692	0.710984	up	AT2G40113	Pollen Ole e 1 allergen and extensin family protein [Source:EMBL;Acc:AEC09782.1]	AT2G40113 AT2G40113.1 Pollen Ole e 1 allergen and extensin family protein;(source:Araport11) protein_coding
AT5G46230	1.5776	0.65773	up	3.45493	1.78866	up	2.19725	1.1357	up	3.44131	1.78296	up	AT5G46230	uncharacterized protein [Source:EMBL;Acc:AED95355.1]	AT5G46230 AT5G46230.1 hypothetical protein (Protein of unknown function, DUF538);(source:Araport11) protein_coding
AT1G70810	2.48423	1.3128	up	3.45403	1.78828	up	1.70478	0.769587	up	2.36711	1.24313	up	AT1G70810	calcium-dependent lipid-binding domain [Source:EMBL;Acc:AEE35119.1]	AT1G70810 AT1G70810.1 Calcium-dependent lipid-binding (CaLB domain) family protein;(source:Araport11) protein_coding C2-DOMAIN ABA-RELATED7 (CAR7) C2-DOMAIN ABA-RELATED7 (CAR7)
AT4G00955	2.48968	1.31596	up	3.43782	1.78149	up	3.41912	1.77362	up	3.14674	1.65386	up	AT4G00955	uncharacterized protein [Source:EMBL;Acc:AEE81960.1]	AT4G00955 AT4G00955.1 wall-associated receptor kinase-like protein;(source:Araport11) protein_coding
AT5G56230	2.7552	1.46216	up	3.42784	1.7773	up	2.72803	1.44786	up	2.88951	1.53082	up	PRA1.G2	PRA1 family protein G2 [Source:EMBL;Acc:AED96737.1]	AT5G56230 AT5G56230.1 prenylated RAB acceptor 1.G2;(source:Araport11) protein_coding PRENYLATED RAB ACCEPTOR 1.G2 (PRA1.G2) PRENYLATED RAB ACCEPTOR 1.G2 (PRA1.G2)
AT1G34750	2.58599	1.37072	up	3.42784	1.7773	up	2.62001	1.38957	up	2.26331	1.17843	up	AT1G34750	putative protein phosphatase 2C 10 [Source:EMBL;Acc:AEE31734.1]	AT1G34750 AT1G34750.1 Protein phosphatase 2C family protein;(source:Araport11) protein_coding
AT5G17810	4.49031	2.16682	up	3.42434	1.77582	up	-1.32298	-0.403794	down	-1.64436	-0.717526	down	WOX12	WUSCHEL-related homeobox 12 [Source:EMBL;Acc:AED92473.1]	AT5G17810 AT5G17810.1 Encodes a WUSCHEL-related homeobox gene family member with 65 amino acids in its homeodomain. Proteins in this family contain a sequence of eight residues (TLPLFPMH) downstream of the homeodomain called the WUS box. Together with WOX11, WOX12 is involved in de novo root organogenesis. protein_coding WUSCHEL RELATED HOMEOBOX 12 (WOX12) WUSCHEL RELATED HOMEOBOX 12 (WOX12)
AT5G48657	1.78707	0.837597	up	3.42187	1.77478	up	1.89064	0.918874	up	1.85377	0.890463	up	AT5G48657	defense protein-like protein [Source:EMBL;Acc:AED95707.1]	AT5G48657 AT5G48657.1 defense protein-like protein;(source:Araport11) protein_coding
AT3G30843	4.50645	2.17199	up	3.41468	1.77175	up	1.06967	0.0971645	up	-2.03377	-1.02415	down	AT3G30843		AT3G30843 AT3G30843.1 transposable_element_gene;(source:Araport11);similar to unknown protein [Arabidopsis thaliana] (TAIR:AT4G08056.1);(source:TAIR10) transposable_element_gene
AT5G39890	-1.25473	-0.327376	down	3.41352	1.77126	up	-1.46974	-0.555564	down	7.73569	2.95153	up	AT5G39890	uncharacterized protein [Source:EMBL;Acc:AED94488.1]	AT5G39890 AT5G39890.1 2-aminoethanethiol dioxygenase, putative (DUF1637);(source:Araport11) protein_coding PLANT CYSTEINE OXIDASE 2 (PCO2) PLANT CYSTEINE OXIDASE 2 (PCO2)
AT5G64750	5.19054	2.37588	up	3.39706	1.76429	up	-1.71966	-0.782126	down	-2.73306	-1.45052	down	ABR1	ethylene-responsive transcription factor ABR1 [Source:EMBL;Acc:AED97946.1]	AT5G64750 AT5G64750.1 Encodes a putative transcription factor containing an AP2 domain. Is a member of the ERF (ethylene response factor) subfamily B-4 of ERF/AP2 transcription factor family. Expressed in response to ABA, osmotic stress, sugar stress and drought. Mutants are hypersensitive to these stresses. May be involved in regulation of ABA mediated stress response. The mRNA is cell-to-cell m…
AT4G33560	1.1563	0.209521	up	3.39705	1.76428	up	1.05386	0.0756803	up	4.36891	2.12727	up	AT4G33560	Wound-responsive family protein [Source:EMBL;Acc:AEE86246.1]	AT4G33560 AT4G33560.1 Wound-responsive family protein;(source:Araport11) protein_coding
AT5G15250	8.45526	3.07985	up	3.38808	1.76047	up	-1.14726	-0.198189	down	-1.56135	-0.642797	down	ATFTSH6	cell division protease ftsH-6 [Source:EMBL;Acc:AED92137.1]	AT5G15250 AT5G15250.2 Encodes an FtsH protease that is localized to the chloroplast. AtFtsH6 is involved in the degradation of both Lhcb3 and Lhcb1 during senescence and high-light acclimation. protein_coding FTSH PROTEASE 6 (FTSH6) FTSH PROTEASE 6 (FTSH6)
AT5G57510	3.3585	1.74782	up	3.38372	1.75861	up	-1.18213	-0.241391	down	1.38277	0.467558	up	AT5G57510	uncharacterized protein [Source:EMBL;Acc:AED96909.1]	AT5G57510 AT5G57510.1 cotton fiber protein;(source:Araport11) protein_coding
AT1G66390	2.70937	1.43796	up	3.3655	1.75082	up	1.51687	0.601098	up	1.46602	0.551906	up	ATMYB90	transcription factor MYB90 [Source:EMBL;Acc:AEE34503.1]	AT1G66390 AT1G66390.1 production of anthocyanin pigment 2 protein (PAP2) protein_coding MYB DOMAIN PROTEIN 90 (MYB90) (ATMYB90);MYB DOMAIN PROTEIN 90 (MYB90);PRODUCTION OF ANTHOCYANIN PIGMENT 2 (PAP2)
AT4G37990	3.44688	1.78529	up	3.35915	1.7481	up	-1.65845	-0.729836	down	-1.09789	-0.134736	down	ELI3	cinnamyl alcohol dehydrogenase 8 [Source:EMBL;Acc:AEE86861.1]	AT4G37990 AT4G37990.1 Encodes an aromatic alcohol:NADP+ oxidoreductase whose mRNA levels are increased in response to treatment with a variety of phytopathogenic bacteria. Though similar to mannitol dehydrogenases, this enzyme does not have mannitol dehydrogenase activity. protein_coding ELICITOR-ACTIVATED GENE 3-2 (ELI3-2) ELICITOR-ACTIVATED GENE 3-2 (ELI3-2);CINNAMYL-ALCOHOL DEHYDROGENASE B2 (C…
AT4G08470	2.19558	1.1346	up	3.33929	1.73954	up	2.65676	1.40967	up	3.00002	1.58497	up	MEKK3	MAPK/ERK kinase kinase 3 [Source:EMBL;Acc:AEE82648.1]	AT4G08470 AT4G08470.1 Encodes a member of the A1 subgroup of the MEKK (MAPK/ERK kinase kinase) family. MEKK is another name for Mitogen-Activated Protein Kinase Kinase Kinase (MAPKKK or MAP3K). This subgroup has four members: At4g08500 (MEKK1, also known as ARAKIN, MAP3Kb1, MAPKKK8), At4g08480 (MEKK2, also known as MAP3Kb4, MAPKKK9), At4g08470 (MEKK3, also known as MAP3Kb3, MAPKKK10) and At4g1202…
AT4G40020	2.16527	1.11455	up	3.33816	1.73905	up	1.11096	0.151808	up	-1.1089	-0.149125	down	AT4G40020	Myosin heavy chain-related protein [Source:EMBL;Acc:AEE87154.1]	AT4G40020 AT4G40020.1 Myosin heavy chain-related protein;(source:Araport11) protein_coding
AT2G41342	1.31308	0.392959	up	3.32617	1.73386	up	-1.12337	-0.167838	down	2.38574	1.25444	up	AT2G41342	uncharacterized protein [Source:EMBL;Acc:AEC09962.1]	AT2G41342 AT2G41342.1 hypothetical protein;(source:Araport11) protein_coding
AT1G51960	1.62582	0.701172	up	3.32456	1.73316	up	1.66159	0.732563	up	2.48129	1.31109	up	IQD27	IQ-domain 27 protein [Source:EMBL;Acc:AEE32739.1]	AT1G51960 AT1G51960.1 IQ-domain 27;(source:Araport11) protein_coding IQ-DOMAIN 27 (IQD27) IQ-DOMAIN 27 (IQD27)
AT1G56660	2.51847	1.33255	up	3.31824	1.73042	up	2.54962	1.35028	up	4.10357	2.03688	up	AT1G56660	uncharacterized protein [Source:EMBL;Acc:AEE33420.1]	AT1G56660 AT1G56660.1 MAEBL domain protein;(source:Araport11) protein_coding
AT2G19190	2.14751	1.10266	up	3.30187	1.72328	up	2.41574	1.27247	up	1.49086	0.576141	up	FRK1	senescence-induced receptor-like serine/threonine-protein kinase [Source:EMBL;Acc:AEC06856.1]	AT2G19190 AT2G19190.1 Encodes a receptor-like protein kinase that is involved in early defense signaling. Expression of this gene is strongly induced during leaf senescence. It is a target of the transcription factor AtWRKY6. protein_coding FLG22-INDUCED RECEPTOR-LIKE KINASE 1 (FRK1) SE- NESCENCE-INDUCED RECEPTOR-LIKE KINASE (SIRK);FLG22-INDUCED RECEPTOR-LIKE KINASE 1 (FRK1)
AT4G36450	2.0617	1.04383	up	3.2996	1.72229	up	-1.30859	-0.388011	down	1.21291	0.278476	up	ATMPK14	mitogen-activated protein kinase 14 [Source:EMBL;Acc:AEE86657.1]	AT4G36450 AT4G36450.1 member of MAP Kinase protein_coding MITOGEN-ACTIVATED PROTEIN KINASE 14 (MPK14) MITOGEN-ACTIVATED PROTEIN KINASE 14 (ATMPK14);MITOGEN-ACTIVATED PROTEIN KINASE 14 (MPK14); (MPK14)
AT3G60540	1.54164	0.624469	up	3.29921	1.72212	up	1.78039	0.832197	up	2.829	1.50029	up	AT3G60540	Preprotein translocase Sec, Sec61-beta subunit protein [Source:EMBL;Acc:AEE80077.1]	AT3G60540 AT3G60540.1 Preprotein translocase Sec, Sec61-beta subunit protein;(source:Araport11) protein_coding
AT4G23700	2.36504	1.24187	up	3.28662	1.7166	up	-1.29684	-0.375004	down	1.03318	0.0470972	up	ATCHX17	cation/H(+) antiporter 17 [Source:EMBL;Acc:AEE84796.1]	AT4G23700 AT4G23700.1 member of Putative Na+/H+ antiporter family protein_coding CATION/H+ EXCHANGER 17 (CHX17) CATION/H+ EXCHANGER 17 (ATCHX17);CATION/H+ EXCHANGER 17 (CHX17)
AT2G31210	3.79247	1.92314	up	3.28049	1.71391	up	1.46975	0.555574	up	-1.17127	-0.228069	down	AT2G31210	transcription factor bHLH91 [Source:EMBL;Acc:AEC08508.1]	AT2G31210 AT2G31210.1 Encodes a bHLH transcription factor that together with bHLH089 and bHLH010 is important for the normal transcriptome of the developing Arabidopsis anther, possibly by forming a feed-forward loop with DYT1. protein_coding BASIC HELIX LOOP HELIX PROTEIN 91 (BHLH091) BASIC HELIX LOOP HELIX PROTEIN 91 (BHLH091)
AT3G11580	2.37857	1.2501	up	3.26951	1.70907	up	-1.00151	-0.00217104	down	1.84008	0.879765	up	AT3G11580	AP2/B3 domain-containing protein [Source:EMBL;Acc:AEE75069.1]	AT3G11580 AT3G11580.1 SOD7 encodes nuclear localized B3 DNA binding domain and a transcriptional repression motif. Belongs to the RAV gene family. Functions in regulation of seed size and binds to and represses KLU. protein_coding NGATHA-LIKE PROTEIN2 (NGAL2) SUPPRESSOR OF DA1-1 (SOD7);NGATHA-LIKE PROTEIN2 (NGAL2)
AT4G18990	5.45078	2.44646	up	3.26537	1.70725	up	-1.03776	-0.0534766	down	1.23746	0.30738	up	XTH29	xyloglucan:xyloglucosyl transferase [Source:EMBL;Acc:AEE84120.1]	AT4G18990 AT4G18990.1 xyloglucan endotransglucosylase/hydrolase 29;(source:Araport11) protein_coding XYLOGLUCAN ENDOTRANSGLUCOSYLASE/HYDROLASE 29 (XTH29) XYLOGLUCAN ENDOTRANSGLUCOSYLASE/HYDROLASE 29 (XTH29)
AT5G01850	2.83205	1.50185	up	3.26	1.70487	up	2.39193	1.25818	up	2.65366	1.40799	up	AT5G01850	protein kinase family protein [Source:EMBL;Acc:AED90401.1]	AT5G01850 AT5G01850.1 Protein kinase superfamily protein;(source:Araport11) protein_coding
AT3G25020	3.74886	1.90645	up	3.2592	1.70452	up	2.88551	1.52883	up	2.34165	1.22752	up	RLP42	receptor like protein 42 [Source:EMBL;Acc:AEE76968.1]	AT3G25020 AT3G25020.1 receptor like protein 42;(source:Araport11) protein_coding RECEPTOR LIKE PROTEIN 42 (RLP42) RECEPTOR LIKE PROTEIN 42 (AtRLP42);RESPONSE TO BOTRYTIS POLYGALACTURONASES 1 (RBPG1);RECEPTOR LIKE PROTEIN 42 (RLP42)
AT1G72540	1.15481	0.207659	up	3.24304	1.69735	up	-1.38309	-0.467892	down	1.32471	0.405673	up	AT1G72540	protein kinase-like protein [Source:EMBL;Acc:AEE35337.1]	AT1G72540 AT1G72540.1 Protein kinase superfamily protein;(source:Araport11) protein_coding
AT1G43910	1.36108	0.444751	up	3.23008	1.69157	up	1.29125	0.368767	up	-1.02205	-0.0314689	down	AT1G43910	P-loop containing nucleoside triphosphate hydrolase-like protein [Source:EMBL;Acc:AEE32007.1]	AT1G43910 AT1G43910.1 P-loop containing nucleoside triphosphate hydrolases superfamily protein;(source:Araport11) protein_coding
AT5G25250	1.38611	0.471042	up	3.22882	1.69101	up	1.87764	0.908917	up	1.47372	0.559467	up	AT5G25250	Flotillin-like protein 1 [Source:EMBL;Acc:AED93417.1]	AT5G25250 AT5G25250.1 Encodes a protein that is involved in a membrane microdomain-dependent, but clathrin-independent, endocytic pathway required for optimal seedling development. The mRNA is cell-to-cell mobile. protein_coding FLOTILLIN 1 (FLOT1) FLOTILLIN 1 (FLOT1)
AT4G32205	5.08693	2.34679	up	3.22013	1.68712	up	3.55303	1.82905	up	3.44589	1.78488	up	AT4G32205	transposable element gene.[Source:TAIR;Acc:AT4G32205]	AT4G32205 AT4G32205.1 transposable_element_gene;(source:Araport11);similar to filament protein-related [Arabidopsis thaliana] (TAIR:AT3G10100.1);(source:TAIR10) transposable_element_gene
AT3G28210	4.98239	2.31684	up	3.21847	1.68638	up	-1.37243	-0.456728	down	-1.31991	-0.400441	down	PMZ	zinc finger AN1 domain-containing stress-associated protein 12 [Source:EMBL;Acc:AEE77416.1]	AT3G28210 AT3G28210.1 Encodes a putative zinc finger protein (PMZ). protein_coding (PMZ) STRESS-ASSOCIATED PROTEIN 12 (SAP12); (PMZ)
AT4G27740	1.95914	0.97022	up	3.21368	1.68422	up	2.20128	1.13834	up	4.78346	2.25805	up	AT4G27740	yippee-like protein [Source:EMBL;Acc:AEE85387.1]	AT4G27740 AT4G27740.1 Yippee family putative zinc-binding protein;(source:Araport11) protein_coding
AT5G38900	2.59339	1.37484	up	3.21029	1.68271	up	1.51128	0.595769	up	1.04892	0.0689111	up	AT5G38900	DSBA oxidoreductase family protein [Source:EMBL;Acc:AED94373.1]	AT5G38900 AT5G38900.1 Thioredoxin superfamily protein;(source:Araport11) protein_coding
AT1G76230	3.42284	1.7752	up	3.208	1.68167	up	1.67189	0.741481	up	1.89963	0.925715	up	AT1G76230	uncharacterized protein [Source:EMBL;Acc:AEE35813.1]	AT1G76230 AT1G76230.1 hypothetical protein;(source:Araport11) protein_coding
AT1G69520	1.61968	0.695711	up	3.20429	1.68	up	1.74862	0.806214	up	2.1049	1.07375	up	AT1G69520	S-adenosylmethionine-dependent methyltransferase domain-containing protein [Source:EMBL;Acc:AEE34937.1]	AT1G69520 AT1G69520.1 S-adenosyl-L-methionine-dependent methyltransferases superfamily protein;(source:Araport11) protein_coding
AT2G31335	3.49359	1.80471	up	3.20251	1.6792	up	1.84096	0.880458	up	2.03258	1.02331	up	AT2G31335	uncharacterized protein [Source:EMBL;Acc:AEC08528.1]	AT2G31335 AT2G31335.1 hypothetical protein;(source:Araport11) protein_coding
AT3G03640	1.80099	0.84879	up	3.19484	1.67575	up	-1.60603	-0.6835	down	-1.10595	-0.145282	down	GLUC	putative inactive beta-glucosidase 25 [Source:EMBL;Acc:AEE73966.1]	AT3G03640 AT3G03640.1 Encodes beta-glucosidase (GLUC). protein_coding BETA GLUCOSIDASE 25 (BGLU25) (GLUC);BETA GLUCOSIDASE 25 (BGLU25)
AT3G47090	4.04808	2.01724	up	3.19322	1.67501	up	2.59287	1.37455	up	1.17733	0.235519	up	AT3G47090	leucine-rich repeat protein kinase-like protein [Source:EMBL;Acc:AEE78242.1]	AT3G47090 AT3G47090.1 Leucine-rich repeat protein kinase family protein;(source:Araport11) protein_coding
AT4G30640	1.98682	0.990459	up	3.18542	1.67148	up	4.4127	2.14166	up	3.96226	1.98632	up	AT4G30640	putative F-box/LRR-repeat protein 19 [Source:EMBL;Acc:AEE85789.1]	AT4G30640 AT4G30640.1 RNI-like superfamily protein;(source:Araport11) protein_coding
AT1G13520	4.20812	2.07318	up	3.18512	1.67135	up	-1.00546	-0.00786018	down	-2.1742	-1.12048	down	AT1G13520	uncharacterized protein [Source:EMBL;Acc:AEE29029.1]	AT1G13520 AT1G13520.1 hypothetical protein (DUF1262);(source:Araport11) protein_coding
AT3G18250	1.8193	0.863382	up	3.18339	1.67057	up	-1.1605	-0.214746	down	1.68214	0.750298	up	AT3G18250	Putative membrane lipoprotein [Source:EMBL;Acc:AEE76072.1]	AT3G18250 AT3G18250.1 Putative membrane lipoprotein;(source:Araport11) protein_coding
AT2G28710	2.12975	1.09068	up	3.17816	1.66819	up	-1.64397	-0.717184	down	-1.22456	-0.292258	down	AT2G28710	C2H2-type zinc finger-containing protein [Source:EMBL;Acc:AEC08162.1]	AT2G28710 AT2G28710.1 C2H2-type zinc finger family protein;(source:Araport11) protein_coding
AT5G67340	2.61174	1.38501	up	3.17163	1.66522	up	1.88129	0.911722	up	1.37518	0.459625	up	AT5G67340	U-box domain-containing protein 2 [Source:EMBL;Acc:AED98330.1]	AT5G67340 AT5G67340.1 ARM repeat superfamily protein;(source:Araport11) protein_coding (PUB2) (PUB2)
AT3G51450	2.91932	1.54563	up	3.17081	1.66485	up	2.96577	1.56841	up	2.69686	1.43128	up	AT3G51450	strictosidine synthase family protein [Source:EMBL;Acc:AEE78794.1]	AT3G51450 AT3G51450.1 Calcium-dependent phosphotriesterase superfamily protein;(source:Araport11) protein_coding
AT1G35735	3.32548	1.73356	up	3.17045	1.66469	up	-1.11107	-0.151944	down	-1.1654	-0.22082	down	AT1G35735	transposable element gene.[Source:TAIR;Acc:AT1G35735]	AT1G35735 AT1G35735.1 transposable_element_gene;(source:Araport11);copia-like retrotransposon family, has a 7.7e-113 P-value blast match to GB:BAA22288 pol polyprotein (Ty1_Copia-element) (Oryza australiensis)GB:BAA22288 polyprotein (Ty1_Copia-element) (Oryza australiensis)gi|2443320|dbj|BAA22288.1| polyprotein (RIRE1) (Oryza australiensis) (Ty1_Copia-element);(source:TAIR10) transposable_element…
AT5G07770	2.66685	1.41514	up	3.15284	1.65665	up	3.00424	1.587	up	3.14486	1.653	up	AT5G07770	formin-like protein 16 [Source:EMBL;Acc:AED91202.1]	AT5G07770 AT5G07770.1 Actin-binding FH2 protein;(source:Araport11) protein_coding FORMIN HOMOLOG 16 (FH16) (ATFH16);FORMIN HOMOLOG 16 (FH16)
AT3G06490	5.94757	2.5723	up	3.12815	1.64531	up	-1.55249	-0.634586	down	-1.60728	-0.684619	down	AtMYB108	myb domain protein 108 [Source:EMBL;Acc:AEE74402.1]	AT3G06490 AT3G06490.1 putative transcription factor MYB108 (MYB108) mRNA, protein_coding MYB DOMAIN PROTEIN 108 (MYB108) MYB DOMAIN PROTEIN 108 (MYB108);BOTRYTIS-SUSCEPTIBLE1 (BOS1);MYB DOMAIN PROTEIN 108 (AtMYB108)
AT4G26270	3.56999	1.83592	up	3.12757	1.64504	up	2.09007	1.06355	up	2.23873	1.16268	up	PFK3	6-phosphofructokinase 3 [Source:EMBL;Acc:AEE85178.1]	AT4G26270 AT4G26270.1 phosphofructokinase 3;(source:Araport11) protein_coding PHOSPHOFRUCTOKINASE 3 (PFK3) PHOSPHOFRUCTOKINASE 3 (PFK3)
AT4G10720	2.10134	1.07131	up	3.11994	1.64152	up	1.93643	0.953398	up	2.62988	1.395	up	AT4G10720	ankyrin repeat-containing protein [Source:EMBL;Acc:AEE82921.1]	AT4G10720 AT4G10720.1 Ankyrin repeat family protein;(source:Araport11) protein_coding
AT4G39360	7.09507	2.82682	up	3.11863	1.64091	up	-1.65465	-0.726528	down	1.00356	0.0051229	up	AT4G39360	uncharacterized protein [Source:EMBL;Acc:AEE87060.1]	AT4G39360 AT4G39360.1 hypothetical protein;(source:Araport11) protein_coding
AT2G40180	1.40898	0.494656	up	3.11527	1.63936	up	-1.1111	-0.151993	down	-1.09071	-0.125267	down	ATHPP2C5	putative protein phosphatase 2C 30 [Source:EMBL;Acc:AEC09793.1]	AT2G40180 AT2G40180.1 Encodes PP2C5, a member of the PP2C family phosphatases. PP2C5 acts as a MAPK phosphatase that positively regulates seed germination, stomatal closure and ABA-inducible gene expression. protein_coding PHOSPHATASE 2C5 (PP2C5) PHOSPHATASE 2C5 (ATHPP2C5);PHOSPHATASE 2C5 (PP2C5)
AT4G17785	6.83478	2.77289	up	3.11215	1.63791	up	-2.21477	-1.14716	down	-6.4803	-2.69606	down	MYB39	transcription factor MYB39 [Source:EMBL;Acc:AEE83950.1]	AT4G17785 AT4G17785.1 Encodes a putative transcription factor (MYB39). protein_coding MYB DOMAIN PROTEIN 39 (MYB39) MYB DOMAIN PROTEIN 39 (MYB39)
AT2G37440	2.10407	1.07318	up	3.11213	1.6379	up	1.64707	0.719906	up	1.25731	0.33034	up	AT2G37440	endonuclease/exonuclease/phosphatase domain-containing protein [Source:EMBL;Acc:AEC09400.1]	AT2G37440 AT2G37440.1 DNAse I-like superfamily protein;(source:Araport11) protein_coding
AT5G18780	2.66216	1.4126	up	3.10934	1.63661	up	1.40081	0.486258	up	1.54557	0.628139	up	AT5G18780	F-box domain-containing protein [Source:EMBL;Acc:AED92611.1]	AT5G18780 AT5G18780.1 F-box/RNI-like superfamily protein;(source:Araport11) protein_coding
AT3G30840	1.76075	0.816193	up	3.1064	1.63524	up	-1.0332	-0.0471184	down	1.70755	0.77193	up	AT3G30840	uncharacterized protein [Source:EMBL;Acc:AEE77663.1]	AT3G30840 AT3G30840.1 hypothetical protein;(source:Araport11) protein_coding
AT2G27660	2.48674	1.31426	up	3.09861	1.63162	up	2.2457	1.16716	up	1.63828	0.712179	up	AT2G27660	cysteine/histidine-rich C1 domain-containing protein [Source:EMBL;Acc:AEC08023.1]	AT2G27660 AT2G27660.1 Cysteine/Histidine-rich C1 domain family protein;(source:Araport11) protein_coding
AT2G30395	1.29274	0.370427	up	3.0971	1.63092	up	-2.13184	-1.0921	down	-1.4909	-0.576181	down	ATOFP17	ovate family protein 17 [Source:EMBL;Acc:AEC08381.1]	AT2G30395 AT2G30395.1 Member of the plant specific ovate protein family of unknown function. protein_coding OVATE FAMILY PROTEIN 17 (OFP17) OVATE FAMILY PROTEIN 17 (OFP17); (ATOFP17)
AT4G21120	1.93251	0.950476	up	3.09375	1.62936	up	1.56277	0.644109	up	1.42868	0.51468	up	CAT1	amino acid transporter 1 [Source:EMBL;Acc:AEE84405.1]	AT4G21120 AT4G21120.1 Encodes a member of the cationic amino acid transporter (CAT) subfamily of amino acid polyamine choline transporters. Mediates efficient uptake of Lys, Arg and Glu in a yeast system. The mRNA is cell-to-cell mobile. protein_coding AMINO ACID TRANSPORTER 1 (AAT1) AMINO ACID TRANSPORTER 1 (AAT1); (ATCAT1);CATIONIC AMINO ACID TRANSPORTER 1 (CAT1)
AT4G36710	1.94074	0.956608	up	3.0855	1.6255	up	1.70408	0.768996	up	2.38242	1.25243	up	AT4G36710	scarecrow-like protein 15 [Source:EMBL;Acc:AEE86692.1]	AT4G36710 AT4G36710.1 GRAS family transcription factor;(source:Araport11) protein_coding (HAM4) (HAM4);SCARECROW-LIKE 15 (SCL15);ARABIDOPSIS THALIANA HAIRY MERISTEM 4 (AtHAM4)
AT5G14490	7.39702	2.88694	up	3.08212	1.62392	up	-2.08976	-1.06334	down	2.14465	1.10074	up	anac085	NAC domain containing protein 85 [Source:EMBL;Acc:AED92040.1]	AT5G14490 AT5G14490.1 NAC domain containing protein 85;(source:Araport11) protein_coding NAC DOMAIN CONTAINING PROTEIN 85 (NAC085) NAC DOMAIN CONTAINING PROTEIN 85 (anac085);NAC DOMAIN CONTAINING PROTEIN 85 (NAC085)
AT5G15120	1.11479	0.156772	up	3.08024	1.62304	up	-1.04431	-0.0625474	down	7.99849	2.99973	up	AT5G15120	uncharacterized protein [Source:EMBL;Acc:AED92119.1]	AT5G15120 AT5G15120.1 2-aminoethanethiol dioxygenase, putative (DUF1637);(source:Araport11) protein_coding PLANT CYSTEINE OXIDASE 1 (PCO1) PLANT CYSTEINE OXIDASE 1 (PCO1)
AT5G11320	2.73242	1.45018	up	3.0796	1.62274	up	1.25797	0.331099	up	1.71524	0.778412	up	YUC4	Flavin-binding monooxygenase family protein [Source:EMBL;Acc:AED91659.1]	AT5G11320 AT5G11320.1 Belongs to the YUC gene family. Encodes a predicted flavin monooxygenase YUC4 involved in auxin biosynthesis and plant development. protein_coding YUCCA4 (YUC4) YUCCA4 (YUC4); (ATYUC4)
AT5G62520	1.96116	0.971708	up	3.07553	1.62084	up	-1.50991	-0.594464	down	2.25448	1.1728	up	SRO5	RCD one 5-like protein [Source:EMBL;Acc:AED97617.1]	AT5G62520 AT5G62520.1 Encodes a protein with similarity to RCD1 but without the WWE domain. The protein does have a PARP signature upstream of the C-terminal protein interaction domain. The PARP signature may bind NAD+ and attach the ADP-ribose-moiety from NAD+ to the target molecule. Its presence suggests a role for the protein in ADP ribosylation. Up-regulated by NaCl. SRO5 and P5CDH (an overla…
AT4G28490	3.27861	1.71308	up	3.07514	1.62065	up	3.20736	1.68139	up	2.10925	1.07673	up	RLK5	receptor-like protein kinase 5 [Source:EMBL;Acc:AEE85494.1]	AT4G28490 AT4G28490.1 Member of Receptor kinase-like protein family. Controls the separation step of floral organ abscission. The mRNA is cell-to-cell mobile. protein_coding HAESA (HAE) HAESA (HAE);RECEPTOR-LIKE PROTEIN KINASE 5 (RLK5)
AT4G14610	2.5748	1.36446	up	3.07182	1.61909	up	2.44692	1.29097	up	1.70394	0.768878	up	AT4G14610	pseudogene.[Source:TAIR;Acc:AT4G14610]	AT4G14610 AT4G14610.1 Probably not a pseudogene based on evidence for transcription (RNA-seq) and translation (Ribo-seq) described in PMID:27791167 pseudogene
AT3G30120	1.85839	0.894054	up	3.06563	1.61618	up	-3.20399	-1.67987	down	-2.59162	-1.37385	down	AT3G30120	pseudogene.[Source:TAIR;Acc:AT3G30120]	AT3G30120 AT3G30120.1 pseudogene of mediator of RNA polymerase II transcription subunit;(source:Araport11) pseudogene
AT1G43310	1.48599	0.571429	up	3.0638	1.61532	up	1.46681	0.552686	up	2.01617	1.01162	up	AT1G43310	Nucleotide-sugar transporter family protein [Source:EMBL;Acc:AEE31966.1]	AT1G43310 AT1G43310.1 Nucleotide-sugar transporter family protein;(source:Araport11) protein_coding
AT5G22270	1.67284	0.742302	up	3.05796	1.61257	up	1.25924	0.332555	up	3.31532	1.72915	up	AT5G22270	uncharacterized protein [Source:EMBL;Acc:AED93003.1]	AT5G22270 AT5G22270.1 hypothetical protein;(source:Araport11) protein_coding SALT-INDUCED AND EIN3/EIL1-DEPENDENT 1 (SIED1) SALT-INDUCED AND EIN3/EIL1-DEPENDENT 1 (SIED1)
AT3G48920	1.97017	0.978317	up	3.05636	1.61181	up	-1.52501	-0.608818	down	-1.0124	-0.0177865	down	AtMYB45	myb domain protein 45 [Source:EMBL;Acc:AEE78473.1]	AT3G48920 AT3G48920.1 Member of the R2R3 factor gene family. protein_coding MYB DOMAIN PROTEIN 45 (MYB45) MYB DOMAIN PROTEIN 45 (AtMYB45);MYB DOMAIN PROTEIN 45 (MYB45)
AT2G38340	3.03682	1.60256	up	3.05571	1.61151	up	-2.56033	-1.35633	down	-3.11621	-1.63979	down	DREB19	dehydration-responsive element-binding protein 2E [Source:EMBL;Acc:AEC09525.1]	AT2G38340 AT2G38340.1 encodes a member of the DREB subfamily A-2 of ERF/AP2 transcription factor family. The protein contains one AP2 domain. There are eight members in this subfamily including DREB2A AND DREB2B that are involved in response to drought. protein_coding DEHYDRATION RESPONSE ELEMENT-BINDING PROTEIN 19 (DREB19) DEHYDRATION RESPONSE ELEMENT-BINDING PROTEIN 19 (DREB19)
AT2G43140	1.79558	0.844454	up	3.05175	1.60964	up	2.17479	1.12088	up	1.81153	0.857206	up	AT2G43140	transcription factor bHLH129 [Source:EMBL;Acc:AEC10213.1]	AT2G43140 AT2G43140.2 bHLH129 is a nuclear localized basic helix loop helix protein. It has been shown to function as a transcriptional repressor. Overexpression of bHLH129 regulates root elongation and ABA response. protein_coding (BHLH129) (BHLH129)
AT4G25200	6.49977	2.70039	up	3.04865	1.60817	up	-1.58902	-0.668134	down	-3.45728	-1.78964	down	ATHSP23.6-MITO	small heat shock protein 23.6 [Source:EMBL;Acc:AEE85024.1]	AT4G25200 AT4G25200.1 AtHSP23.6-mito mRNA, nuclear gene encoding mitochondrial protein_coding MITOCHONDRION-LOCALIZED SMALL HEAT SHOCK PROTEIN 23.6 (HSP23.6-MITO) MITOCHONDRION-LOCALIZED SMALL HEAT SHOCK PROTEIN 23.6 (ATHSP23.6-MITO);MITOCHONDRION-LOCALIZED SMALL HEAT SHOCK PROTEIN 23.6 (HSP23.6-MITO)
AT5G45490	2.23838	1.16245	up	3.04638	1.6071	up	3.56577	1.83421	up	4.62114	2.20825	up	AT5G45490	putative disease resistance protein [Source:EMBL;Acc:AED95259.1]	AT5G45490 AT5G45490.1 P-loop containing nucleoside triphosphate hydrolases superfamily protein;(source:Araport11) protein_coding
AT3G05660	2.50712	1.32603	up	3.03719	1.60274	up	2.27319	1.18472	up	1.73529	0.795181	up	RLP33	receptor like protein 33 [Source:EMBL;Acc:AEE74273.1]	AT3G05660 AT3G05660.1 receptor like protein 33;(source:Araport11) protein_coding RECEPTOR LIKE PROTEIN 33 (RLP33) RECEPTOR LIKE PROTEIN 33 (RLP33);RECEPTOR LIKE PROTEIN 33 (AtRLP33)
AT1G43800	1.10749	0.147288	up	3.03606	1.6022	up	-1.5347	-0.617956	down	3.11919	1.64117	up	AT1G43800	stearoyl-acyl-carrier protein desaturase-like protein [Source:EMBL;Acc:AEE31998.1]	AT1G43800 AT1G43800.1 Plant stearoyl-acyl-carrier-protein desaturase family protein;(source:Araport11) protein_coding FLORAL TRANSITION AT THE MERISTEM1 (FTM1) FLORAL TRANSITION AT THE MERISTEM1 (FTM1);ACYL?ACYL CARRIER PROTEIN (ACP) DESATURASE 6 (AAD6);STEAROYL-ACYL CARRIER PROTEIN &#916;9-DESATURASE6 (SAD6)
AT5G26340	2.35473	1.23556	up	3.02819	1.59845	up	1.08299	0.115022	up	1.04519	0.0637713	up	MSS1	sugar transport protein 13 [Source:EMBL;Acc:AED93553.1]	AT5G26340 AT5G26340.1 Encodes a protein with high affinity, hexose-specific/H+ symporter activity. The activity of the transporter appears to be negatively regulated by phosphorylation. Importantly, microarray analysis, as well as the study of the expression of this gene in mutants involved in programmed cell death (PCD) demonstrated a tight correlation between this gene's expression and PCD. pro…
AT3G04181	2.79918	1.485	up	3.02787	1.5983	up	1.93965	0.955799	up	1.69453	0.760889	up	AT3G04181	uncharacterized protein [Source:EMBL;Acc:AEE74049.1]	AT3G04181 AT3G04181.1 hypothetical protein;(source:Araport11) protein_coding
AT1G07000	2.2957	1.19894	up	3.02374	1.59633	up	2.41042	1.26929	up	1.84593	0.884345	up	ATEXO70B2	exocyst complex component 7 [Source:EMBL;Acc:AEE28064.1]	AT1G07000 AT1G07000.1 A member of EXO70 gene family, putative exocyst subunits, conserved in land plants. Arabidopsis thaliana contains 23 putative EXO70 genes, which can be classified into eight clusters on the phylogenetic tree. protein_coding EXOCYST SUBUNIT EXO70 FAMILY PROTEIN B2 (EXO70B2) EXOCYST SUBUNIT EXO70 FAMILY PROTEIN B2 (EXO70B2);EXOCYST SUBUNIT EXO70 FAMILY PROTEIN B2 (ATEXO70B2)
AT1G15040	2.65363	1.40797	up	3.0209	1.59498	up	-1.19385	-0.255627	down	1.98996	0.992736	up	AT1G15040	class I glutamine amidotransferase domain-containing protein [Source:EMBL;Acc:AEE29259.1]	AT1G15040 AT1G15040.1 Encodes a nitrogen regulated putative glutamine amidotransferase that represses shoot branching. protein_coding GLUTAMINE AMIDOTRANSFERASE 1_2.1 (GAT1_2.1) GLUTAMINE AMIDOTRANSFERASE (GAT);GLUTAMINE AMIDOTRANSFERASE 1_2.1 (GAT1_2.1)
AT3G45620	2.29048	1.19565	up	3.0153	1.5923	up	2.39074	1.25746	up	2.84933	1.51062	up	AT3G45620	transducin/WD40 domain-containing protein [Source:EMBL;Acc:AEE78051.1]	AT3G45620 AT3G45620.2 This gene is predicted to encode a protein with a DWD motif. It can bind to DDB1a in Y2H assays, and DDB1b in co-IP assays, and may be involved in the formation of a CUL4-based E3 ubiquitin ligase protein_coding
AT2G46940	1.61148	0.688385	up	3.01164	1.59055	up	1.75388	0.81055	up	1.7804	0.832199	up	AT2G46940	uncharacterized protein [Source:EMBL;Acc:AEC10775.1]	AT2G46940 AT2G46940.1 fold protein;(source:Araport11) protein_coding
AT1G79450	2.37952	1.25067	up	3.00714	1.58839	up	1.20344	0.26716	up	1.25275	0.325093	up	ALIS5	ALA-interacting subunit 5 [Source:EMBL;Acc:AEE36245.1]	AT1G79450 AT1G79450.1 ALA-interacting subunit 5;(source:Araport11) protein_coding ALA-INTERACTING SUBUNIT 5 (ALIS5) ALA-INTERACTING SUBUNIT 5 (ALIS5)
AT1G10417	2.05135	1.03658	up	3.00626	1.58797	up	2.16146	1.11201	up	2.90864	1.54034	up	AT1G10417	uncharacterized protein [Source:EMBL;Acc:AEE28578.1]	AT1G10417 AT1G10417.1 Encodes protein with unknown function whose expression is repressed by inoculation with Agrobacterium tumerifaciens. protein_coding
AT2G39530	1.34064	0.422925	up	3.00359	1.58669	up	2.25828	1.17522	up	2.65383	1.40808	up	AT2G39530	UPF0497 membrane protein [Source:EMBL;Acc:AEC09691.1]	AT2G39530 AT2G39530.1 Uncharacterized protein family (UPF0497);(source:Araport11) protein_coding CASP-LIKE PROTEIN 4D1 (CASPL4D1) CASP-LIKE PROTEIN 4D1 (CASPL4D1)
AT1G72930	2.76407	1.46679	up	2.99149	1.58087	up	2.56487	1.35889	up	2.90709	1.53958	up	TIR	toll/interleukin-1 receptor-like protein [Source:EMBL;Acc:AEE35393.1]	AT1G72930 AT1G72930.1 Toll/interleukin-1 receptor-like protein (TIR) mRNA, protein_coding TOLL/INTERLEUKIN-1 RECEPTOR-LIKE (TIR) TOLL/INTERLEUKIN-1 RECEPTOR-LIKE (TIR); (ATTN10);TIR-NUCLEOTIDE BINDING SITE FAMILY 10 (TN10)
AT1G65810	3.78131	1.91889	up	2.9865	1.57845	up	-2.25659	-1.17414	down	-1.5859	-0.665304	down	AT1G65810	DNA helicase domain-containing protein [Source:EMBL;Acc:AEE34425.1]	AT1G65810 AT1G65810.1 P-loop containing nucleoside triphosphate hydrolases superfamily protein;(source:Araport11) protein_coding
AT3G48850	2.11032	1.07746	up	2.97785	1.57427	up	-1.13764	-0.186044	down	-1.21732	-0.283707	down	PHT3;2	phosphate transporter 3;2 [Source:EMBL;Acc:AEE78463.1]	AT3G48850 AT3G48850.1 Encodes a mitochondrial phosphate transporter. Modulates plant responses to salt stress. protein_coding PHOSPHATE TRANSPORTER 3;2 (PHT3;2) MITOCHONDRIAL PHOSPHATE TRANSPORTER 2 (MPT2);PHOSPHATE TRANSPORTER 3;2 (PHT3;2)
AT5G51830	1.88233	0.912521	up	2.97722	1.57397	up	-1.54288	-0.625623	down	-1.4881	-0.573471	down	AT5G51830	fructokinase [Source:EMBL;Acc:AED96132.1]	AT5G51830 AT5G51830.1 Encodes one of the several Arabidopsis fructokinases. Nomenclature according to Riggs 2017 has been adopted for the family by the community (personal communication, Boernke, Callis, Granot, Boernke, and Smeekens). Important for seed oil accumulation and vascular development. protein_coding FRUCTOKINASE 1 (FRK1) FRUCTOKINASE 1 (FRK1);FRUCTOKINASE 7 (FRK7)
AT3G46080	2.7138	1.44031	up	2.97386	1.57234	up	-1.74666	-0.804595	down	-1.02443	-0.0348206	down	AT3G46080	C2H2-type zinc finger protein [Source:EMBL;Acc:AEE78110.1]	AT3G46080 AT3G46080.1 C2H2-type zinc finger family protein;(source:Araport11) protein_coding
AT4G23230	2.30938	1.20751	up	2.95534	1.56332	up	5.65427	2.49934	up	4.8968	2.29184	up	CRK15	cysteine-rich receptor-like protein kinase 15 [Source:EMBL;Acc:AEE84726.1]	AT4G23230 AT4G23230.1 Encodes a cysteine-rich receptor-like protein kinase. protein_coding CYSTEINE-RICH RLK (RECEPTOR-LIKE PROTEIN KINASE) 15 (CRK15) CYSTEINE-RICH RLK (RECEPTOR-LIKE PROTEIN KINASE) 15 (CRK15)
AT5G43580	2.22369	1.15296	up	2.94941	1.56043	up	-1.66513	-0.735633	down	1.08768	0.121249	up	AT5G43580	Serine protease inhibitor, potato inhibitor I-type family protein [Source:EMBL;Acc:AED94984.1]	AT5G43580 AT5G43580.1 Predicted to encode a PR (pathogenesis-related) peptide that belongs to the PR-6 proteinase inhibitor family. Functions in resistance to necrotrophic fungi and insect herbivory. Six putative PR-6-type protein encoding genes are found in Arabidopsis: At2g38900, At2g38870, At5g43570, At5g43580, At3g50020 and At3g46860. protein_coding UNUSUAL SERINE PROTEASE INHIBITOR (UPI) UNU…
AT1G69050	2.12752	1.08918	up	2.94856	1.56001	up	1.53665	0.619793	up	2.11223	1.07877	up	AT1G69050	uncharacterized protein [Source:EMBL;Acc:AEE34880.1]	AT1G69050 AT1G69050.1 hypothetical protein;(source:Araport11) protein_coding
AT1G07400	3.48511	1.80121	up	2.94079	1.5562	up	1.19829	0.260972	up	1.02123	0.030313	up	AT1G07400	class I heat shock protein [Source:EMBL;Acc:AEE28120.1]	AT1G07400 AT1G07400.1 HSP20-like chaperones superfamily protein;(source:Araport11) protein_coding
AT1G67810	1.73185	0.79231	up	2.93736	1.55452	up	-2.56783	-1.36055	down	-1.99041	-0.993068	down	SUFE2	sulfur E2 [Source:EMBL;Acc:AEE34701.1]	AT1G67810 AT1G67810.1 Encodes a protein capable of stimulating the cysteine desulfurase activity of CpNifS (AT1G08490) in vitro. SufE2:GFP localizes to the chloroplasts where it is likely to play a role in iron-sulfur cluster assembly. Transcript levels for this gene are high in the pollen relative to other organs based on RT-PCR analysis. The mRNA is cell-to-cell mobile. protein_coding SULFUR E2…
AT3G62280	1.61906	0.69516	up	2.9352	1.55346	up	3.45778	1.78984	up	4.20576	2.07237	up	AT3G62280	GDSL esterase/lipase [Source:EMBL;Acc:AEE80331.1]	AT3G62280 AT3G62280.1 GDSL-motif esterase/acyltransferase/lipase. Enzyme group with broad substrate specificity that may catalyze acyltransfer or hydrolase reactions with lipid and non-lipid substrates. protein_coding
AT4G20370	2.55552	1.35362	up	2.93416	1.55295	up	2.55552	1.35362	up	3.1064	1.63524	up	TSF	protein TWIN SISTER of FT [Source:EMBL;Acc:AEE84314.1]	AT4G20370 AT4G20370.1 Encodes a floral inducer that is a homolog of FT. Plants overexpressing this gene flower earlier than Col. Loss-of-function mutations flower later in short days. TSF and FT play overlapping roles in the promotion of flowering, with FT playing the dominant role.TSF sequences show extensive variation in different accessions and may contribute to quantitative variation in flowe…
AT2G19890	2.3876	1.25556	up	2.93416	1.55295	up	1.68758	0.754958	up	2.19564	1.13464	up	AT2G19890	uncharacterized protein [Source:EMBL;Acc:AEC06939.1]	AT2G19890 AT2G19890.1 hypothetical protein;(source:Araport11) protein_coding
AT2G40340	3.66289	1.87298	up	2.93377	1.55275	up	-1.98961	-0.992483	down	-2.56628	-1.35968	down	DREB2C	dehydration-responsive element-binding protein 2C [Source:EMBL;Acc:AEC09816.1]	AT2G40340 AT2G40340.1 Encodes a member of the DREB subfamily A-2 of ERF/AP2 transcription factor family. The protein contains one AP2 domain. There are eight members in this subfamily including DREB2A AND DREB2B that are involved in response to drought. protein_coding (DREB2C) (AtERF48); (DREB2C)
AT4G18980	4.05444	2.0195	up	2.93106	1.55142	up	2.13244	1.0925	up	2.84487	1.50836	up	AtS40-3	protein AtS40-3 [Source:EMBL;Acc:AEE84119.1]	AT4G18980 AT4G18980.1 Encodes a nuclear-targeted protein AtS40-3 that modulates senescence associated gene expression. protein_coding ATS40-3 (AtS40-3) ATS40-3 (AtS40-3)
AT3G47010	2.86129	1.51667	up	2.92517	1.54852	up	3.65498	1.86986	up	4.20704	2.07281	up	AT3G47010	beta-D-glucan exohydrolase-like protein [Source:EMBL;Acc:AEE78232.1]	AT3G47010 AT3G47010.1 Glycosyl hydrolase family protein;(source:Araport11) protein_coding
AT2G07825	1.54687	0.629354	up	2.91173	1.54188	up	1.02115	0.0301906	up	1.64248	0.71588	up	AT2G07825	uncharacterized protein [Source:EMBL;Acc:AEC06113.1]	AT2G07825 AT2G07825.1 hypothetical protein;(source:Araport11) protein_coding
AT1G34420	3.16563	1.66249	up	2.90992	1.54098	up	2.55435	1.35296	up	1.98037	0.985772	up	AT1G34420	leucine-rich repeat transmembrane protein kinase-like protein [Source:EMBL;Acc:AEE31712.1]	AT1G34420 AT1G34420.1 leucine-rich repeat transmembrane protein kinase family protein;(source:Araport11) protein_coding
AT3G60450	2.00765	1.00551	up	2.89644	1.53428	up	1.42491	0.510875	up	1.74027	0.799315	up	AT3G60450	phosphoglycerate mutase-like protein [Source:EMBL;Acc:AEE80063.1]	AT3G60450 AT3G60450.1 Phosphoglycerate mutase family protein;(source:Araport11) protein_coding
AT1G31885	2.66433	1.41378	up	2.89069	1.53141	up	1.94452	0.959411	up	1.69908	0.764754	up	NIP3;1	aquaporin NIP3-1 [Source:EMBL;Acc:AEE31413.1]	AT1G31885 AT1G31885.1 NOD26-like intrinsic protein 3;(source:Araport11) protein_coding NOD26-LIKE INTRINSIC PROTEIN 3;1 (NIP3;1) NOD26-LIKE INTRINSIC PROTEIN 3;1 (NIP3;1)
AT4G15417	1.45239	0.538425	up	2.89057	1.53136	up	1.67329	0.742683	up	1.98666	0.990344	up	ATRTL1	protein RNAse II-like 1 [Source:EMBL;Acc:AEE83600.1]	AT4G15417 AT4G15417.1 RNAse II-like 1;(source:Araport11) protein_coding RNASE II-LIKE 1 (RTL1) RNASE II-LIKE 1 (ATRTL1);RNASE II-LIKE 1 (RTL1)
AT2G31250	3.46547	1.79305	up	2.88753	1.52984	up	-1.09837	-0.13536	down	-2.28787	-1.19401	down	HEMA3	glutamyl-tRNA reductase [Source:EMBL;Acc:AEC08514.1]	AT2G31250 AT2G31250.1 Glutamyl-tRNA reductase family protein;(source:Araport11) protein_coding (HEMA3) (HEMA3)
AT1G22110	1.5598	0.641357	up	2.88503	1.52859	up	1.52458	0.608415	up	1.60334	0.681078	up	AT1G22110	structural constituent of ribosome [Source:EMBL;Acc:AEE30198.1]	AT1G22110 AT1G22110.1 structural constituent of ribosome;(source:Araport11) protein_coding
AT4G05497	2.82233	1.49688	up	2.88171	1.52693	up	1.92152	0.942252	up	1.78497	0.835897	up	AT4G05497	putative F-box/LRR-repeat protein 9 [Source:EMBL;Acc:AEE82528.1]	AT4G05497 AT4G05497.1 RNI-like superfamily protein;(source:Araport11) protein_coding
AT3G46680	2.54796	1.34934	up	2.88048	1.52631	up	-1.04992	-0.0702858	down	1.12996	0.176268	up	AT3G46680	UDP-glycosyltransferase-like protein [Source:EMBL;Acc:AEE78193.1]	AT3G46680 AT3G46680.1 UDP-Glycosyltransferase superfamily protein;(source:Araport11) protein_coding
AT1G02520	2.83222	1.50193	up	2.87485	1.52349	up	-1.63148	-0.706182	down	-2.90534	-1.53871	down	PGP11	P-glycoprotein 11 [Source:EMBL;Acc:AEE27440.1]	AT1G02520 AT1G02520.1 Encodes an ATP-binding cassette (ABC) transporter. Expressed in the vascular tissue of primary stem. The mRNA is cell-to-cell mobile. protein_coding ATP-BINDING CASSETTE B11 (ABCB11) P-GLYCOPROTEIN 11 (PGP11);MULTI-DRUG RESISTANCE 8 (MDR8);ATP-BINDING CASSETTE B11 (ABCB11)
AT3G11840	1.89985	0.925886	up	2.87284	1.52248	up	2.28344	1.19121	up	2.50502	1.32482	up	PUB24	plant U-box 24 protein [Source:EMBL;Acc:AEE75107.1]	AT3G11840 AT3G11840.1 Encodes a U-box-domain-containing E3 ubiquitin ligase that acts as a negative regulator of PAMP-triggered immunity. protein_coding PLANT U-BOX 24 (PUB24) PLANT U-BOX 24 (PUB24)
AT1G69730	3.53026	1.81977	up	2.86891	1.5205	up	5.54463	2.47109	up	2.67069	1.41721	up	AT1G69730	wall-associated receptor kinase-like 9 [Source:EMBL;Acc:AEE34968.1]	AT1G69730 AT1G69730.1 Wall-associated kinase family protein;(source:Araport11) protein_coding
AT2G47190	3.60151	1.8486	up	2.86745	1.51977	up	1.12553	0.170604	up	1.78126	0.832898	up	ATMYB2	myb domain protein 2 [Source:EMBL;Acc:AEC10812.1]	AT2G47190 AT2G47190.1 Encodes a MYB transcription factor that possesses an R2R3 MYB DNA binding domain and is known to regulate the expression of salt- and dehydration-responsive genes. Has been shown to bind calmodulin. protein_coding MYB DOMAIN PROTEIN 2 (MYB2) MYB DOMAIN PROTEIN 2 (MYB2);MYB DOMAIN PROTEIN 2 (ATMYB2)
AT5G58660	1.3018	0.380507	up	2.86669	1.51938	up	1.38023	0.464911	up	1.87759	0.908883	up	AT5G58660	oxidoreductase, 2OG-Fe(II) oxygenase family protein [Source:EMBL;Acc:AED97082.1]	AT5G58660 AT5G58660.1 2-oxoglutarate (2OG) and Fe(II)-dependent oxygenase superfamily protein;(source:Araport11) protein_coding
AT1G13830	1.67263	0.742116	up	2.85316	1.51256	up	1.46196	0.547907	up	1.7366	0.796267	up	AT1G13830	carbohydrate-binding X8 domain-containing protein [Source:EMBL;Acc:AEE29073.1]	AT1G13830 AT1G13830.1 Carbohydrate-binding X8 domain superfamily protein;(source:Araport11) protein_coding
AT3G55700	1.88873	0.91742	up	2.85257	1.51226	up	1.61374	0.690404	up	1.46164	0.547589	up	AT3G55700	UDP-glycosyltransferase-like protein [Source:EMBL;Acc:AEE79424.1]	AT3G55700 AT3G55700.1 UDP-Glycosyltransferase superfamily protein;(source:Araport11) protein_coding
AT2G02010	2.69652	1.4311	up	2.84527	1.50856	up	1.8017	0.849357	up	1.85824	0.89394	up	GAD4	glutamate decarboxylase 4 [Source:EMBL;Acc:AEC05532.1]	AT2G02010 AT2G02010.1 glutamate decarboxylase 4;(source:Araport11) protein_coding GLUTAMATE DECARBOXYLASE 4 (GAD4) GLUTAMATE DECARBOXYLASE 4 (GAD4)
AT1G02430	1.92902	0.94787	up	2.84508	1.50847	up	1.13069	0.1772	up	1.55258	0.634667	up	ATARFD1B	ADP-ribosylation factor D1B [Source:EMBL;Acc:AEE27429.1]	AT1G02430 AT1G02430.1 A member of ARF GTPase family. A thaliana has 21 members of this family, known to be essential for vesicle coating and uncoating and functions in GTP-binding. Gene encoding ADP-ribosylation factor and similar to other ARFs and ARF-like proteins. protein_coding ADP-RIBOSYLATION FACTOR D1B (ARFD1B) ADP-RIBOSYLATION FACTOR D1B (ARFD1B);ADP-RIBOSYLATION FACTOR D1B (ATARFD1B)
AT5G42250	2.15378	1.10687	up	2.84359	1.50771	up	1.3132	0.393085	up	1.52391	0.607776	up	AT5G42250	alcohol dehydrogenase-like 7 [Source:EMBL;Acc:AED94788.1]	AT5G42250 AT5G42250.1 Zinc-binding alcohol dehydrogenase family protein;(source:Araport11) protein_coding
AT1G78290	1.88571	0.915107	up	2.84149	1.50665	up	1.11346	0.155054	up	2.23908	1.16291	up	AT1G78290	serine/threonine-protein kinase SRK2C [Source:EMBL;Acc:AEE36092.1]	AT1G78290 AT1G78290.2 encodes a member of SNF1-related protein kinase (SnRK2) family whose activity is activated by ionic (salt) and non-ionic (mannitol) osmotic stress and dehydration. protein_coding SNF1-RELATED PROTEIN KINASE 2-8 (SNRK2-8) SNF1-RELATED PROTEIN KINASE 2C (SRK2C);SNF1-RELATED PROTEIN KINASE 2-8 (SNRK2-8);SNF1-RELATED PROTEIN KINASE 2.8 (SNRK2.8)
AT3G03855	2.10433	1.07336	up	2.83716	1.50445	up	2.34688	1.23075	up	1.70526	0.769993	up	AT3G03855	pseudogene.[Source:TAIR;Acc:AT3G03855]	AT3G03855 AT3G03855.1 Annotated as pseudogene of disease resistance protein.Probably not a pseudogene based on evidence for transcription (RNA-seq) and translation (Ribo-seq) described in PMID:27791167 . pseudogene
AT2G16870	2.40885	1.26834	up	2.8369	1.50432	up	2.50475	1.32467	up	2.07371	1.05221	up	AT2G16870	TIR-NBS-LRR class disease resistance protein [Source:EMBL;Acc:AEC06545.1]	AT2G16870 AT2G16870.1 Disease resistance protein (TIR-NBS-LRR class) family;(source:Araport11) protein_coding
AT2G38823	2.93531	1.55351	up	2.82874	1.50016	up	-1.31053	-0.390148	down	-1.7029	-0.767992	down	AT2G38823	uncharacterized protein [Source:EMBL;Acc:AEC09591.1]	AT2G38823 AT2G38823.1 hypothetical protein;(source:Araport11) protein_coding
AT2G29500	3.15187	1.65621	up	2.82078	1.49609	up	-1.25897	-0.332248	down	-1.46952	-0.555345	down	AT2G29500	HSP20 family protein [Source:EMBL;Acc:AEC08261.1]	AT2G29500 AT2G29500.1 HSP20-like chaperones superfamily protein;(source:Araport11) protein_coding
AT5G67450	1.83277	0.874023	up	2.81624	1.49377	up	1.41588	0.501698	up	1.85796	0.893721	up	AZF1	zinc-finger protein 1 [Source:EMBL;Acc:AED98346.1]	AT5G67450 AT5G67450.1 Encodes zinc-finger protein. mRNA levels are elevated in response to low temperature, cold temperatures and high salt. The protein is localized to the nucleus and acts as a transcriptional repressor. protein_coding ZINC-FINGER PROTEIN 1 (ZF1) ZINC-FINGER PROTEIN 1 (AZF1);ZINC-FINGER PROTEIN 1 (ZF1)
AT1G63340	2.34356	1.2287	up	2.8073	1.48918	up	-1.67011	-0.73994	down	1.03491	0.0495002	up	AT1G63340	flavin-containing monooxygenase-like protein [Source:EMBL;Acc:AEE34088.1]	AT1G63340 AT1G63340.1 Flavin-containing monooxygenase family protein;(source:Araport11) protein_coding
AT1G24520	3.67047	1.87597	up	2.80538	1.4882	up	1.18313	0.242606	up	1.9909	0.993424	up	BCP1	homolog of Brassica campestris pollen protein 1 [Source:EMBL;Acc:AEE30543.1]	AT1G24520 AT1G24520.1 Male fertility gene acting on tapetum and microspore protein_coding HOMOLOG OF BRASSICA CAMPESTRIS POLLEN PROTEIN 1 (BCP1) HOMOLOG OF BRASSICA CAMPESTRIS POLLEN PROTEIN 1 (BCP1)
AT5G66910	2.36356	1.24096	up	2.80154	1.48622	up	1.81339	0.858689	up	2.21613	1.14804	up	AT5G66910	CC-NBS-LRR class disease resistance protein [Source:EMBL;Acc:AED98277.1]	AT5G66910 AT5G66910.1 Disease resistance protein (CC-NBS-LRR class) family;(source:Araport11) protein_coding
AT4G22530	2.18135	1.12522	up	2.79761	1.48419	up	-1.04514	-0.0636931	down	1.22249	0.289819	up	AT4G22530	S-adenosyl-L-methionine-dependent methyltransferase domain-containing protein [Source:EMBL;Acc:AEE84618.1]	AT4G22530 AT4G22530.1 S-adenosyl-L-methionine-dependent methyltransferases superfamily protein;(source:Araport11) protein_coding
AT5G13700	1.77779	0.830084	up	2.7959	1.48331	up	-1.14141	-0.190814	down	1.09407	0.129708	up	ATPAO1	Polyamine oxidase 1 [Source:EMBL;Acc:AED91929.1]	AT5G13700 AT5G13700.1 Encodes a protein with polyamine oxidase activity. The mRNA of this gene is only expressed in very low amounts in the organs where it was detected (light-grown plants). protein_coding POLYAMINE OXIDASE 1 (PAO1) POLYAMINE OXIDASE 1 (ATPAO1);POLYAMINE OXIDASE 1 (PAO1); (APAO)
AT3G54410	1.24375	0.314697	up	2.79586	1.48329	up	1.04361	0.0615845	up	-1.07104	-0.0990126	down	AT3G54410	uncharacterized protein [Source:EMBL;Acc:AEE79227.1]	AT3G54410 AT3G54410.1 hypothetical protein (DUF1163);(source:Araport11) protein_coding
AT1G69880	1.5076	0.592252	up	2.79363	1.48214	up	-1.26717	-0.341606	down	1.84239	0.881581	up	ATH8	thioredoxin H8 [Source:EMBL;Acc:AEE34994.1]	AT1G69880 AT1G69880.1 thioredoxin H-type 8;(source:Araport11) protein_coding THIOREDOXIN H-TYPE 8 (TH8) THIOREDOXIN H-TYPE 8 (TH8);THIOREDOXIN H-TYPE 8 (ATH8)
AT3G43800	1.69911	0.764777	up	2.79176	1.48118	up	1.78864	0.83886	up	3.4937	1.80475	up	ATGSTU27	glutathione S-transferase [Source:EMBL;Acc:AEE77830.1]	AT3G43800 AT3G43800.1 Encodes glutathione transferase belonging to the tau class of GSTs. Naming convention according to Wagner et al. (2002). The mRNA is cell-to-cell mobile. protein_coding GLUTATHIONE S-TRANSFERASE TAU 27 (GSTU27) GLUTATHIONE S-TRANSFERASE TAU 27 (ATGSTU27);GLUTATHIONE S-TRANSFERASE TAU 27 (GSTU27)
AT1G02250	4.39695	2.1365	up	2.791	1.48078	up	-1.46536	-0.551252	down	-2.46935	-1.30413	down	anac005	NAC domain-containing protein 5 [Source:EMBL;Acc:AEE27406.1]	AT1G02250 AT1G02250.1 Encodes a member of the NAC family of transcription factors. ANAC005 contains sequences specifying both nuclear and plasma membrane targeting. Overexpression results in increased xylem differentiation suggesting ANAC005 promotes xylem formation. protein_coding NAC DOMAIN CONTAINING PROTEIN 5 (NAC005) NAC DOMAIN CONTAINING PROTEIN 5 (NAC005);NAC DOMAIN CONTAINING PROTEIN 5 (a…
AT5G55090	2.41424	1.27157	up	2.78826	1.47937	up	-1.1629	-0.217722	down	1.11155	0.152573	up	MAPKKK15	mitogen-activated protein kinase kinase kinase 15 [Source:EMBL;Acc:AED96579.1]	AT5G55090 AT5G55090.1 member of MEKK subfamily protein_coding MITOGEN-ACTIVATED PROTEIN KINASE KINASE KINASE 15 (MAPKKK15) MITOGEN-ACTIVATED PROTEIN KINASE KINASE KINASE 15 (MAPKKK15)
AT3G28480	2.20287	1.13939	up	2.78581	1.4781	up	2.40857	1.26818	up	2.8864	1.52927	up	AT3G28480	prolyl 4-hydroxylase [Source:EMBL;Acc:AEE77450.1]	AT3G28480 AT3G28480.2 Oxoglutarate/iron-dependent oxygenase;(source:Araport11) protein_coding
AT3G60420	2.11421	1.08012	up	2.77822	1.47416	up	1.28673	0.36371	up	1.22452	0.292211	up	AT3G60420	Phosphoglycerate mutase family protein [Source:EMBL;Acc:AEE80061.1]	Phosphoglycerate mutase family protein;(source:Araport11)
AT3G06260	2.61375	1.38612	up	2.77592	1.47296	up	-2.18209	-1.12571	down	-1.65642	-0.728069	down	GATL4	putative galacturonosyltransferase-like 4 [Source:EMBL;Acc:AEE74366.1]	AT3G06260 AT3G06260.1 Encodes a protein with putative galacturonosyltransferase activity. protein_coding GALACTURONOSYLTRANSFERASE-LIKE 4 (GATL4) GALACTINOL SYNTHASE 9 (GolS9);GALACTURONOSYLTRANSFERASE-LIKE 4 (GATL4)
AT1G17430	2.45211	1.29402	up	2.77374	1.47183	up	3.58834	1.84332	up	3.64097	1.86432	up	AT1G17430	alpha/beta-hydrolase domain-containing protein [Source:EMBL;Acc:AEE29586.1]	AT1G17430 AT1G17430.1 alpha/beta-Hydrolases superfamily protein;(source:Araport11) protein_coding
AT1G68450	3.82725	1.93631	up	2.77031	1.47005	up	1.00525	0.00756121	up	-1.03058	-0.0434525	down	AT1G68450	VQ motif-containing protein [Source:EMBL;Acc:AEE34795.1]	AT1G68450 AT1G68450.1 VQ motif-containing protein;(source:Araport11) protein_coding PIGMENT DEFECTIVE 337 (PDE337) PIGMENT DEFECTIVE 337 (PDE337)
AT4G26060	1.79988	0.847903	up	2.77029	1.47004	up	1.2533	0.325728	up	1.89911	0.925324	up	AT4G26060	ribosomal protein L18ae family protein [Source:EMBL;Acc:AEE85151.1]	AT4G26060 AT4G26060.1 Ribosomal protein L18ae family;(source:Araport11) protein_coding
AT5G65300	2.23434	1.15985	up	2.76591	1.46775	up	-1.44415	-0.530219	down	-1.12994	-0.176243	down	AT5G65300	uncharacterized protein [Source:EMBL;Acc:AED98036.1]	AT5G65300 AT5G65300.1 hypothetical protein;(source:Araport11) protein_coding
AT3G09790	2.41504	1.27205	up	2.76513	1.46735	up	3.84221	1.94193	up	5.08734	2.34691	up	UBQ8	polyubiquitin 8 [Source:EMBL;Acc:AEE74813.1]	AT3G09790 AT3G09790.1 encodes a ubiquitin-like protein that contains tandem repeats of the ubiquitin coding region, but at least one repeat per gene encodes a protein with amino acid substitutions. protein_coding UBIQUITIN 8 (UBQ8) UBIQUITIN 8 (UBQ8)
AT3G02550	2.33658	1.2244	up	2.76119	1.46529	up	-2.23787	-1.16212	down	7.35016	2.87778	up	LBD41	LOB domain-containing protein 41 [Source:EMBL;Acc:AEE73827.1]	AT3G02550 AT3G02550.1 LOB domain-containing protein 41;(source:Araport11) protein_coding LOB DOMAIN-CONTAINING PROTEIN 41 (LBD41) LOB DOMAIN-CONTAINING PROTEIN 41 (LBD41)
AT5G12340	4.42594	2.14599	up	2.7586	1.46393	up	1.49518	0.580318	up	1.78465	0.835643	up	AT5G12340	uncharacterized protein [Source:EMBL;Acc:AED91797.1]	AT5G12340 AT5G12340.1 DUF4228 domain protein;(source:Araport11) protein_coding
AT5G60950	2.52773	1.33784	up	2.74813	1.45845	up	6.70761	2.7458	up	5.62381	2.49155	up	COBL5	COBRA-like protein 5 [Source:EMBL;Acc:AED97402.1]	AT5G60950 AT5G60950.1 COBRA-like protein 5 precursor;(source:Araport11) protein_coding COBRA-LIKE PROTEIN 5 PRECURSOR (COBL5) COBRA-LIKE PROTEIN 5 PRECURSOR (COBL5)
AT4G24026	2.07592	1.05375	up	2.74696	1.45783	up	1.06588	0.0920443	up	1.88869	0.917383	up	AT4G24026	uncharacterized protein [Source:EMBL;Acc:AEE84843.1]	AT4G24026 AT4G24026.1 hypothetical protein;(source:Araport11) protein_coding
AT4G01360	3.16141	1.66057	up	2.74361	1.45608	up	1.22903	0.297517	up	1.52174	0.605723	up	AT4G01360	uncharacterized protein [Source:EMBL;Acc:AEE82015.1]	AT4G01360 AT4G01360.1 Encodes a protein related to BYPASS1 (BPS1). Regulates production of mobile compound: bps signal. protein_coding BYPASS 3 (BPS3) BYPASS 3 (BPS3)
AT4G25940	3.05557	1.61144	up	2.74102	1.45471	up	2.22501	1.15381	up	2.68691	1.42595	up	AT4G25940	putative clathrin assembly protein [Source:EMBL;Acc:AEE85135.1]	AT4G25940 AT4G25940.1 ENTH/ANTH/VHS superfamily protein;(source:Araport11) protein_coding
AT5G16080	1.71559	0.778704	up	2.74096	1.45468	up	-1.0737	-0.102596	down	-1.0978	-0.134614	down	AtCXE17	carboxyesterase 17 [Source:EMBL;Acc:AED92244.1]	AT5G16080 AT5G16080.1 carboxyesterase 17;(source:Araport11) protein_coding CARBOXYESTERASE 17 (CXE17) CARBOXYESTERASE 17 (CXE17);CARBOXYESTERASE 17 (AtCXE17)
AT5G40240	2.22827	1.15593	up	2.74026	1.45431	up	1.38748	0.472469	up	1.24216	0.312852	up	AT5G40240	nodulin MtN21 /EamA-like transporter family protein [Source:EMBL;Acc:AED94523.1]	AT5G40240 AT5G40240.2 nodulin MtN21-like transporter family protein protein_coding USUALLY MULTIPLE ACIDS MOVE IN AND OUT TRANSPORTERS 40 (UMAMIT40) USUALLY MULTIPLE ACIDS MOVE IN AND OUT TRANSPORTERS 40 (UMAMIT40)
AT3G51430	2.32774	1.21893	up	2.73928	1.45379	up	1.80087	0.848693	up	2.21438	1.14691	up	SSL5	strictosidine synthase [Source:EMBL;Acc:AEE78792.1]	AT3G51430 AT3G51430.1 Although this enzyme is predicted to encode a strictosidine synthase (SS), it lacks a conserved catalytic glutamate residue found in active SS enzymes and it is not expected to have SS activity. protein_coding YELLOW-LEAF-SPECIFIC GENE 2 (YLS2) YELLOW-LEAF-SPECIFIC GENE 2 (YLS2);STRICTOSIDINE SYNTHASE-LIKE 5 (SSL5)
AT2G43820	3.29718	1.72123	up	2.73678	1.45248	up	1.09278	0.128005	up	1.17381	0.231194	up	GT	UDP-glucosyltransferase 74F2 [Source:EMBL;Acc:AEC10331.1]	AT2G43820 AT2G43820.1 Encodes a nicotinate-O-glycosyltransferase. Induced by Salicylic acid, virus, fungus and bacteria. Also involved in the tryptophan synthesis pathway. Independent of NPR1 for their induction by salicylic acid. UGT74F1 transfers UDP:glucose to salicylic acid (forming a glucoside (SAG) and a glucose ester (SGE)), benzoic acid, and anthranilate in vitro. UGT74F2 shows a weak abi…
AT3G07195	1.64688	0.719739	up	2.73452	1.45129	up	2.18501	1.12764	up	2.1287	1.08997	up	AT3G07195	RPM1-interacting protein 4 (RIN4) family protein [Source:EMBL;Acc:AEE74512.1]	AT3G07195 AT3G07195.1 RPM1-interacting protein 4 (RIN4) family protein;(source:Araport11) protein_coding
AT3G13432	1.25336	0.325803	up	2.73375	1.45088	up	-2.13014	-1.09095	down	-2.05227	-1.03722	down	AT3G13432	uncharacterized protein [Source:EMBL;Acc:AEE75350.1]	AT3G13432 AT3G13432.1 transmembrane protein;(source:Araport11) protein_coding
AT1G56040	1.3151	0.395174	up	2.72949	1.44863	up	-2.67879	-1.42158	down	-1.29067	-0.368123	down	AT1G56040	HEAT/U-box domain-containing protein [Source:EMBL;Acc:AEE33334.1]	AT1G56040 AT1G56040.1 HEAT/U-box protein;(source:Araport11) protein_coding
AT1G65390	2.06015	1.04275	up	2.7231	1.44525	up	1.09624	0.132563	up	1.35212	0.435222	up	ATPP2-A5	protein PHLOEM protein 2-LIKE A5 [Source:EMBL;Acc:AEE34369.1]	AT1G65390 AT1G65390.1 phloem protein 2 A5;(source:Araport11) protein_coding PHLOEM PROTEIN 2 A5 (PP2-A5) PHLOEM PROTEIN 2 A5 (PP2-A5);PHLOEM PROTEIN 2 A5 (ATPP2-A5)
AT5G57200	1.72687	0.788161	up	2.7183	1.4427	up	1.21866	0.28529	up	2.43364	1.28311	up	AT5G57200	putative clathrin assembly protein [Source:EMBL;Acc:AED96865.1]	AT5G57200 AT5G57200.1 ENTH/ANTH/VHS superfamily protein;(source:Araport11) protein_coding
AT4G23215	1.89042	0.918705	up	2.71035	1.43848	up	1.58886	0.667992	up	1.40412	0.489665	up	AT4G23215	pseudogene.[Source:TAIR;Acc:AT4G23215]	AT4G23215 AT4G23215.1 pseudogene of cysteine-rich receptor-like protein kinase family protein pseudogene
AT1G63450	2.70642	1.43638	up	2.69943	1.43266	up	-1.53156	-0.615	down	-1.83648	-0.876944	down	RHS8	root hair specific 8 [Source:EMBL;Acc:AEE34101.1]	AT1G63450 AT1G63450.1 Encodes a xyloglucan-specific galacturonosyltransferase (XUT1) that forms the beta-d-galactosyluronic acid-(1->2)-alpha-d-xylosyl linkage. protein_coding ROOT HAIR SPECIFIC 8 (RHS8) XYLOGLUCAN-SPECIFIC GALACTURONOSYLTRANSFERASE 1 (XUT1);ROOT HAIR SPECIFIC 8 (RHS8)
AT2G38860	1.4021	0.487592	up	2.69238	1.42888	up	1.34888	0.431766	up	1.41754	0.503389	up	YLS5	class I glutamine amidotransferase-like domain-containing protein [Source:EMBL;Acc:AEC09595.1]	AT2G38860 AT2G38860.2 Encodes protease I (pfpI)-like protein YLS5. protein_coding (YLS5) (DJ-1E); (DJ1E); (YLS5)
AT4G36150	2.35095	1.23325	up	2.69072	1.42799	up	2.7725	1.47119	up	1.72573	0.78721	up	AT4G36150	TIR-NBS-LRR class disease resistance protein [Source:EMBL;Acc:AEE86625.1]	AT4G36150 AT4G36150.1 Disease resistance protein (TIR-NBS-LRR class) family;(source:Araport11) protein_coding
AT1G11330	2.41111	1.2697	up	2.69059	1.42792	up	2.48325	1.31223	up	1.69543	0.761652	up	AT1G11330	putative receptor-like protein kinase [Source:EMBL;Acc:AEE28718.1]	AT1G11330 AT1G11330.2 S-locus lectin protein kinase family protein;(source:Araport11) protein_coding
AT4G36490	2.54407	1.34714	up	2.69022	1.42772	up	-1.80013	-0.848103	down	-2.19124	-1.13175	down	ATSFH12	protein SEC14-like 12 [Source:EMBL;Acc:AEE86662.1]	AT4G36490 AT4G36490.1 SEC14-like 12;(source:Araport11) protein_coding SEC14-LIKE 12 (SFH12) SEC14-LIKE 12 (SFH12);SEC14-LIKE 12 (ATSFH12)
AT5G46050	1.50067	0.585609	up	2.6894	1.42729	up	1.89505	0.922234	up	2.32008	1.21418	up	ATPTR3	peptide transporter PTR3-A [Source:EMBL;Acc:AED95332.1]	AT5G46050 AT5G46050.1 Encodes a di- and tri-peptide transporter involved in responses to wounding, virulent bacterial pathogens, and high NaCl concentrations. The protein is predicted to have 12 transmembrane helicies. protein_coding NRT1/ PTR FAMILY 5.2 (NPF5.2) ARABIDOPSIS THALIANA PEPTIDE TRANSPORTER 3 (ATPTR3); (ATNPF5.2);PEPTIDE TRANSPORTER 3 (PTR3);NRT1/ PTR FAMILY 5.2 (NPF5.2)
AT3G25780	1.7931	0.842459	up	2.68379	1.42427	up	2.30054	1.20197	up	3.18605	1.67177	up	AOC3	allene oxide cyclase 3 [Source:EMBL;Acc:AEE77067.1]	AT3G25780 AT3G25780.1 Encodes allene oxide cyclase, one of the enzymes involved in jasmonic acid biosynthesis. One of four genes in Arabidopsis that encode this enzyme. mRNA expression is upregulated in senescing leaves. Note: Nomenclature for Arabidopsis allene oxide cyclase 3 (AOC3, AT3G25780) gene is based on Stenzel et al. 2003 Plant Molecular Biology 51:895-911. AOC3 (AT3G25780) is also refe…
AT3G22160	1.7793	0.831307	up	2.68091	1.42272	up	1.41078	0.496498	up	1.80529	0.852233	up	AT3G22160	VQ motif-containing protein [Source:EMBL;Acc:AEE76595.1]	AT3G22160 AT3G22160.1 VQ motif-containing protein;(source:Araport11) protein_coding JASMONATE-ASSOCIATED VQ MOTIF GENE 1 (JAV1) JASMONATE-ASSOCIATED VQ MOTIF GENE 1 (JAV1)
AT1G14890	2.02621	1.01878	up	2.67922	1.42181	up	1.68431	0.752158	up	2.19467	1.134	up	AT1G14890	plant invertase/pectin methylesterase inhibitor domain-containing protein [Source:EMBL;Acc:AEE29239.1]	AT1G14890 AT1G14890.1 Plant invertase/pectin methylesterase inhibitor superfamily protein;(source:Araport11) protein_coding
AT1G48605	1.5418	0.624614	up	2.67854	1.42145	up	1.73383	0.793963	up	1.91542	0.93766	up	ATHAL3B	putative phosphopantothenoylcysteine decarboxylase [Source:EMBL;Acc:AEE32325.1]	AT1G48605 AT1G48605.1 Encodes a protein similar to yeast HAL3, which regulates the cell cycle and tolerance to salt stress through inhibition of the PPZ1 type-1 protein phosphatase. AtHAL3b mRNA levels are induced by salt stress. HAL3B presumably encodes for phosphopantothenoylcysteine decarboxylase being involved in Coenzyme A biosynthesis as indicated by functional complementation of a double m…
AT4G35190	1.48729	0.572687	up	2.67513	1.41961	up	-1.26976	-0.34456	down	-1.18036	-0.239228	down	AT4G35190	cytokinin riboside 5'-monophosphate phosphoribohydrolase LOG5 [Source:EMBL;Acc:AEE86478.1]	AT4G35190 AT4G35190.1 Putative lysine decarboxylase family protein;(source:Araport11) protein_coding LONELY GUY 5 (LOG5) LONELY GUY 5 (LOG5)
AT5G36925	1.42049	0.506386	up	2.6738	1.41889	up	1.28566	0.362505	up	2.10588	1.07442	up	AT5G36925	uncharacterized protein [Source:EMBL;Acc:AED94127.1]	AT5G36925 AT5G36925.1 hypothetical protein;(source:Araport11) protein_coding ARACIN1 (ARACIN1) ARACIN1 (ARACIN1)
AT5G61010	1.65951	0.730761	up	2.66628	1.41483	up	1.58459	0.664106	up	1.33108	0.412595	up	ATEXO70E2	exocyst complex component 7 [Source:EMBL;Acc:AED97411.1]	AT5G61010 AT5G61010.1 A member of EXO70 gene family, putative exocyst subunits, conserved in land plants. Arabidopsis thaliana contains 23 putative EXO70 genes, which can be classified into eight clusters on the phylogenetic tree. protein_coding EXOCYST SUBUNIT EXO70 FAMILY PROTEIN E2 (EXO70E2) EXOCYST SUBUNIT EXO70 FAMILY PROTEIN E2 (EXO70E2);EXOCYST SUBUNIT EXO70 FAMILY PROTEIN E2 (ATEXO70E2)
AT4G04620	1.52685	0.610556	up	2.66457	1.4139	up	-1.13366	-0.180985	down	1.7461	0.804136	up	ATG8B	autophagy-related protein 8b [Source:EMBL;Acc:AEE82405.1]	AT4G04620 AT4G04620.1 Ubiquitin-like superfamily protein;(source:Araport11) protein_coding AUTOPHAGY 8B (ATG8B) AUTOPHAGY 8B (ATG8B)
AT3G54150	1.41534	0.501147	up	2.6641	1.41365	up	1.06156	0.0861864	up	1.10018	0.137736	up	AT3G54150	S-adenosyl-L-methionine-dependent methyltransferase-like protein [Source:EMBL;Acc:AEE79193.1]	AT3G54150 AT3G54150.1 Encodes a DNA methyltransferase required for pollen exine formation and male fertility via the regulation of callose wall and primexine formation. protein_coding EXINE FORMATION DEFECTIVE (EFD) EXINE FORMATION DEFECTIVE (EFD)
AT5G07460	1.84036	0.879987	up	2.66192	1.41247	up	2.094	1.06626	up	2.39542	1.26028	up	PMSR2	peptide methionine sulfoxide reductase A2 [Source:EMBL;Acc:AED91161.1]	AT5G07460 AT5G07460.1 ubiquitous enzyme that repairs oxidatively damaged proteins. Methionine sulfoxide reductase activity. Mutant lacking reductase activity showed increased protein oxidation, nitration and glycation of specific amino acid residues during darkness. protein_coding PEPTIDEMETHIONINE SULFOXIDE REDUCTASE 2 (PMSR2) ARABIDOPSIS THALIANA METHIONINE SULFOXIDE REDUCTASE 2 (ATMSRA2);PEPTI…
AT4G20110	2.66369	1.41342	up	2.66004	1.41145	up	1.23121	0.300073	up	1.24999	0.32192	up	VSR3;1	vacuolar-sorting receptor 7 [Source:EMBL;Acc:AEE84277.1]	AT4G20110 AT4G20110.2 VACUOLAR SORTING RECEPTOR 7;(source:Araport11) protein_coding VACUOLAR SORTING RECEPTOR 7 (VSR7) VACUOLAR SORTING RECEPTOR 7 (VSR7)
AT3G26550	3.40437	1.76739	up	2.65958	1.4112	up	7.99952	2.99991	up	7.19185	2.84636	up	AT3G26550	cysteine/histidine-rich C1 domain-containing protein [Source:EMBL;Acc:AEE77177.1]	AT3G26550 AT3G26550.1 Cysteine/Histidine-rich C1 domain family protein;(source:Araport11) protein_coding
AT5G38910	12.9606	3.69606	up	2.65738	1.41	up	31.6969	4.98627	up	21.9503	4.45617	up	AT5G38910	putative germin-like protein subfamily 1 member 9 [Source:EMBL;Acc:AED94374.1]	AT5G38910 AT5G38910.1 RmlC-like cupins superfamily protein;(source:Araport11) protein_coding
AT4G03440	2.39389	1.25936	up	2.65696	1.40978	up	3.66891	1.87535	up	2.63454	1.39755	up	AT4G03440	ankyrin repeat-containing protein [Source:EMBL;Acc:AEE82321.1]	AT4G03440 AT4G03440.1 Ankyrin repeat family protein;(source:Araport11) protein_coding
AT3G02770	2.0251	1.01799	up	2.65559	1.40903	up	2.06425	1.04562	up	3.20606	1.6808	up	AT3G02770	Regulator of ribonuclease-like protein 1 [Source:EMBL;Acc:AEE73858.1]	AT3G02770 AT3G02770.1 Ribonuclease E inhibitor RraA/Dimethylmenaquinone methyltransferase;(source:Araport11) protein_coding
AT2G30400	2.68812	1.4266	up	2.64934	1.40563	up	-1.8556	-0.891882	down	-2.41068	-1.26944	down	ATOFP2	ovate family protein 2 [Source:EMBL;Acc:AEC08382.1]	AT2G30400 AT2G30400.1 ovate family protein 2;(source:Araport11) protein_coding OVATE FAMILY PROTEIN 2 (OFP2) OVATE FAMILY PROTEIN 2 (OFP2);ARABIDOPSIS THALIANA OVATE FAMILY PROTEIN 2 (ATOFP2)
AT2G16700	1.77462	0.827513	up	2.64918	1.40554	up	1.0379	0.0536613	up	2.05248	1.03737	up	ADF5	actin depolymerizing factor 5 [Source:EMBL;Acc:AEC06527.1]	AT2G16700 AT2G16700.1 Encodes actin depolymerizing factor 5 (ADF5). protein_coding ACTIN DEPOLYMERIZING FACTOR 5 (ADF5) ACTIN DEPOLYMERIZING FACTOR 5 (ADF5); (ATADF5)
AT2G21850	1.84304	0.882086	up	2.64809	1.40495	up	2.29119	1.1961	up	2.35262	1.23427	up	AT2G21850	Cysteine/Histidine-rich C1 domain family protein [Source:EMBL;Acc:AEC07229.1]	AT2G21850 AT2G21850.1 Cysteine/Histidine-rich C1 domain family protein;(source:Araport11) protein_coding
AT4G32950	3.11893	1.64105	up	2.64291	1.40213	up	-1.11288	-0.1543	down	1.18234	0.241651	up	AT4G32950	putative protein phosphatase 2C 61 [Source:EMBL;Acc:AEE86151.1]	AT4G32950 AT4G32950.1 Protein phosphatase 2C family protein;(source:Araport11) protein_coding
AT2G26750	1.95136	0.964478	up	2.64107	1.40112	up	1.5893	0.668389	up	2.46914	1.30401	up	AT2G26750	alpha/beta-dydrolases-like protein [Source:EMBL;Acc:AEC07882.1]	AT2G26750 AT2G26750.1 alpha/beta-Hydrolases superfamily protein;(source:Araport11) protein_coding
AT2G03230	3.64753	1.86692	up	2.64089	1.40102	up	-5.02812	-2.33002	down	-4.47242	-2.16106	down	AT2G03230	GCK domain-containing protein [Source:EMBL;Acc:AEC05677.1]	AT2G03230 AT2G03230.1 GCK domain-containing protein;(source:Araport11) protein_coding
AT5G43390	8.66407	3.11504	up	2.63872	1.39984	up	1.03927	0.0555743	up	1.20742	0.27193	up	AT5G43390	uncharacterized protein [Source:EMBL;Acc:AED94955.1]	AT5G43390 AT5G43390.1 plant/protein;(source:Araport11) protein_coding
AT3G63030	1.97711	0.983393	up	2.63495	1.39777	up	1.82285	0.866199	up	2.43621	1.28464	up	MBD4	methyl-CPG-binding domain 4 protein [Source:EMBL;Acc:AEE80426.1]	AT3G63030 AT3G63030.1 Protein containing methyl-CpG-binding domain.Has sequence similarity to human MBD proteins. protein_coding METHYL-CPG-BINDING DOMAIN 4 (MBD4) METHYL-CPG-BINDING DOMAIN 4 (MBD4)
AT4G39670	1.84258	0.881725	up	2.62806	1.394	up	-1.09595	-0.132184	down	-1.20502	-0.269059	down	AT4G39670	glycolipid transfer protein [Source:EMBL;Acc:AEE87101.1]	AT4G39670 AT4G39670.1 Glycolipid transfer protein (GLTP) family protein;(source:Araport11) protein_coding
AT5G24140	3.06438	1.61559	up	2.62793	1.39393	up	-2.90575	-1.53891	down	-3.40039	-1.7657	down	SQP2	Squalene monooxygenase 2 [Source:EMBL;Acc:AED93261.1]	AT5G24140 AT5G24140.1 Encodes a protein with similarity to squalene monoxygenases. protein_coding SQUALENE MONOOXYGENASE 2 (SQP2) SQUALENE MONOOXYGENASE 2 (SQP2)
AT3G26820	2.8195	1.49544	up	2.62623	1.39299	up	-1.64234	-0.715754	down	-1.04965	-0.0699146	down	AT3G26820	Esterase/lipase/thioesterase family protein [Source:EMBL;Acc:AEE77219.1]	AT3G26820 AT3G26820.1 Esterase/lipase/thioesterase family protein;(source:Araport11) protein_coding
AT3G48020	3.72452	1.89705	up	2.6247	1.39215	up	-1.76387	-0.818744	down	-1.5456	-0.628167	down	AT3G48020	uncharacterized protein [Source:EMBL;Acc:AEE78357.1]	AT3G48020 AT3G48020.1 hypothetical protein;(source:Araport11) protein_coding
AT2G37710	2.39642	1.26088	up	2.62457	1.39208	up	3.36768	1.75176	up	2.07546	1.05343	up	RLK	receptor lectin kinase [Source:EMBL;Acc:AEC09438.1]	AT2G37710 AT2G37710.1 Induced in response to Salicylic acid. The mRNA is cell-to-cell mobile. protein_coding L-TYPE LECTIN RECEPTOR KINASE IV.1 (LECRK-IV.1) L-TYPE LECTIN RECEPTOR KINASE IV.1 (LECRK-IV.1);RECEPTOR LECTIN KINASE (RLK)
AT4G36090	2.0457	1.0326	up	2.61861	1.3888	up	1.90349	0.928645	up	1.98866	0.991794	up	AT4G36090	oxidoreductase, 2OG-Fe(II) oxygenase family protein [Source:EMBL;Acc:AEE86615.1]	AT4G36090 AT4G36090.3 oxidoreductase, 2OG-Fe(II) oxygenase family protein;(source:Araport11) protein_coding
AT1G31550	2.83319	1.50243	up	2.61406	1.38629	up	1.73552	0.795369	up	2.90654	1.5393	up	AT1G31550	GDSL esterase/lipase [Source:EMBL;Acc:AEE31372.1]	AT1G31550 AT1G31550.2 GDSL-motif esterase/acyltransferase/lipase. Enzyme group with broad substrate specificity that may catalyze acyltransfer or hydrolase reactions with lipid and non-lipid substrates. protein_coding
AT1G03290	2.28139	1.18991	up	2.61347	1.38596	up	1.61971	0.695735	up	1.89138	0.919439	up	AT1G03290	uncharacterized protein [Source:EMBL;Acc:AEE27555.1]	AT1G03290 AT1G03290.1 ELKS/Rab6-interacting/CAST family protein;(source:Araport11) protein_coding
AT5G03495	2.17967	1.12411	up	2.60177	1.37949	up	-1.62294	-0.69861	down	1.08719	0.120608	up	AT5G03495	RNA-binding (RRM/RBD/RNP motifs) family protein [Source:EMBL;Acc:AED90612.1]	AT5G03495 AT5G03495.1 RNA-binding (RRM/RBD/RNP motifs) family protein;(source:Araport11) protein_coding
AT1G11310	2.34101	1.22713	up	2.59868	1.37778	up	2.15155	1.10538	up	1.95214	0.965055	up	PMR2	MLO-like protein 2 [Source:EMBL;Acc:AEE28716.1]	AT1G11310 AT1G11310.1 A member of a large family of seven-transmembrane domain proteins specific to plants, homologs of the barley mildew resistance locus o (MLO) protein. The Arabidopsis genome contains 15 genes encoding MLO proteins, with localization in plasma membrane. Phylogenetic analysis revealed four clades of closely-related AtMLO genes. ATMLO2 belongs to the clade IV, with AtMLO3, AtMLO…
AT3G04070	1.8377	0.877898	up	2.5978	1.37729	up	1.08669	0.119936	up	1.67872	0.747357	up	NAC047	NAC domain containing protein 47 [Source:EMBL;Acc:AEE74033.1]	AT3G04070 AT3G04070.1 NAC domain containing protein 47;(source:Araport11) protein_coding NAC DOMAIN CONTAINING PROTEIN 47 (NAC047) NAC DOMAIN CONTAINING PROTEIN 47 (anac047);SPEEDY HYPONASTIC GROWTH (SHYG);SPEEDY HYPONASTIC GROWTH (SHG);NAC DOMAIN CONTAINING PROTEIN 47 (NAC047)
AT3G48300	2.60333	1.38036	up	2.59747	1.37711	up	-1.46495	-0.550852	down	-1.10247	-0.140734	down	CYP71A23	cytochrome P450 71A23 [Source:EMBL;Acc:AEE78397.1]	AT3G48300 AT3G48300.1 putative cytochrome P450 protein_coding "CYTOCHROME P450, FAMILY 71, SUBFAMILY A, POLYPEPTIDE 23" (CYP71A23) "CYTOCHROME P450, FAMILY 71, SUBFAMILY A, POLYPEPTIDE 23" (CYP71A23)
AT5G48980	1.48734	0.57273	up	2.59707	1.37688	up	-1.38124	-0.46596	down	1.3143	0.394297	up	AT5G48980	F-box/kelch-repeat protein [Source:EMBL;Acc:AED95752.1]	AT5G48980 AT5G48980.1 Galactose oxidase/kelch repeat superfamily protein;(source:Araport11) protein_coding
AT2G25460	3.64332	1.86525	up	2.59428	1.37534	up	1.19672	0.259089	up	1.58528	0.664736	up	AT2G25460	uncharacterized protein [Source:EMBL;Acc:AEC07704.1]	AT2G25460 AT2G25460.1 EEIG1/EHBP1 protein amino-terminal domain protein;(source:Araport11) protein_coding
AT2G15760	1.09889	0.136048	up	2.58995	1.37293	up	-1.13557	-0.183411	down	-1.04722	-0.0665698	down	AT2G15760	uncharacterized protein [Source:EMBL;Acc:AEC06435.1]	AT2G15760 AT2G15760.1 calmodulin-binding protein (DUF1645);(source:Araport11) protein_coding
AT1G47510	3.25643	1.70329	up	2.58932	1.37257	up	1.13272	0.179791	up	1.21006	0.275082	up	AT5PTASE11	Type I inositol-1,4,5-trisphosphate 5-phosphatase 11 [Source:EMBL;Acc:AEE32179.1]	AT1G47510 AT1G47510.1 Encodes a phosphatidylinositol polyphosphate 5-phosphatase. It can dephosphorylate PI(4,5)P2, PI(3,5)P2, and PI(3,4,5)P3, but, it is not active against PI(5)P or the water soluble inositol(1,4,5)P3 or inositol(1,3,4,5)P4. The transcript levels for this gene rise in response to auxin, ABA, and JA. protein_coding INOSITOL POLYPHOSPHATE 5-PHOSPHATASE 11 (5PTASE11) INOSITOL POLY…
AT3G16330	2.29796	1.20035	up	2.58847	1.3721	up	-2.00504	-1.00363	down	-2.11025	-1.07741	down	AT3G16330	uncharacterized protein [Source:EMBL;Acc:AEE75798.1]	AT3G16330 AT3G16330.1 Avr9/Cf-9 rapidly elicited protein;(source:Araport11) protein_coding
AT5G22300	2.09288	1.06549	up	2.58113	1.36801	up	-1.17185	-0.22879	down	-1.30001	-0.378528	down	NIT4	bifunctional nitrilase/nitrile hydratase NIT4 [Source:EMBL;Acc:AED93008.1]	AT5G22300 AT5G22300.1 encodes a nitrilase isomer. The purified enzyme shows a strong substrate specificity for beta-cyano-L-alanine, a intermediate product of the cyanide detoxification pathway. The mRNA is cell-to-cell mobile. protein_coding NITRILASE 4 (NIT4) NITRILASE 4 (AtNIT4);NITRILASE 4 (NIT4)
AT1G58643	2.50976	1.32755	up	2.5743	1.36418	up	2.50976	1.32755	up	4.91007	2.29574	up	AT1G58643	Inositol-pentakisphosphate 2-kinase-like protein [Source:EMBL;Acc:AEE33558.1]	AT1G58643 AT1G58643.1 Inositol-pentakisphosphate 2-kinase family protein;(source:Araport11) protein_coding
AT1G58936	2.50976	1.32755	up	2.5743	1.36418	up	2.50976	1.32755	up	4.91007	2.29574	up	AT1G58936	Inositol-pentakisphosphate 2-kinase-like protein [Source:EMBL;Acc:AEE33566.1]	AT1G58936 AT1G58936.1 Inositol-pentakisphosphate 2-kinase family protein;(source:Araport11) protein_coding
AT1G59312	2.50976	1.32755	up	2.5743	1.36418	up	2.50976	1.32755	up	4.91007	2.29574	up	AT1G59312	Inositol-pentakisphosphate 2-kinase-like protein [Source:EMBL;Acc:AEE33575.1]	AT1G59312 AT1G59312.1 Inositol-pentakisphosphate 2-kinase family protein;(source:Araport11) protein_coding
AT5G08790	2.19743	1.13582	up	2.57413	1.36408	up	-1.37145	-0.455701	down	1.00872	0.0125237	up	ATAF2	protein ATAF2 [Source:EMBL;Acc:AED91350.1]	AT5G08790 AT5G08790.1 induced by wounding, belongs to a large family of putative transcriptional activators with NAC domain. protein_coding (ATAF2) (ATAF2);ARABIDOPSIS NAC DOMAIN CONTAINING PROTEIN 81 (anac081)
AT2G42430	1.02503	0.0356624	up	2.56818	1.36075	up	-1.83341	-0.87453	down	-1.34697	-0.429721	down	LBD16	LOB domain-containing protein 16 [Source:EMBL;Acc:AEC10119.1]	AT2G42430 AT2G42430.1 LOB-domain protein gene LBD16. This gene contains one auxin-responsive element (AuxRE). protein_coding LATERAL ORGAN BOUNDARIES-DOMAIN 16 (LBD16) ASYMMETRIC LEAVES2-LIKE 18 (ASL18);LATERAL ORGAN BOUNDARIES-DOMAIN 16 (LBD16)
AT3G05650	3.65327	1.86919	up	2.5631	1.35789	up	2.3547	1.23554	up	2.01061	1.00764	up	AtRLP32	receptor like protein 32 [Source:EMBL;Acc:AEE74272.1]	AT3G05650 AT3G05650.1 receptor like protein 32;(source:Araport11) protein_coding RECEPTOR LIKE PROTEIN 32 (RLP32) RECEPTOR LIKE PROTEIN 32 (AtRLP32);RECEPTOR LIKE PROTEIN 32 (RLP32)
AT2G41660	2.07997	1.05656	up	2.56108	1.35675	up	1.42341	0.509353	up	1.33881	0.420947	up	MIZ1	uncharacterized protein [Source:EMBL;Acc:AEC10013.1]	AT2G41660 AT2G41660.1 Essential for hydrotropism in roots. Mutant roots are defective in hydrotropism, and have slightly reduced phototropism and modified wavy growth response. Has normal gravitropism and root elongation. protein_coding MIZU-KUSSEI 1 (MIZ1) MIZU-KUSSEI 1 (MIZ1)
AT1G02470	1.86879	0.902101	up	2.55841	1.35525	up	-1.26281	-0.33664	down	1.14426	0.194412	up	AT1G02470	SRPBCC ligand-binding domain-containing protein [Source:EMBL;Acc:AEE27434.1]	AT1G02470 AT1G02470.2 Polyketide cyclase/dehydrase and lipid transport superfamily protein;(source:Araport11) protein_coding
AT1G16670	1.81884	0.863018	up	2.55624	1.35402	up	1.7107	0.77459	up	1.96974	0.978008	up	AT1G16670	kinase domain-containing protein [Source:EMBL;Acc:AEE29481.1]	AT1G16670 AT1G16670.1 Encodes a cold-activated plasma membrane protein cold-responsive protein kinase that phosphorylates 14-3-3 proteins. The phosphorylated 14-3-3 proteins shuttle from the cytosol to the nucleus, where they interact with and destabilize the key cold-responsive C-repeat-binding factor (CBF) proteins, modulate CBF stability and the response to cold stress. protein_coding COLD-RES…
AT1G32960	5.95311	2.57364	up	2.54772	1.3492	up	1.42086	0.506766	up	1.12646	0.17179	up	SBT3.3	Subtilase-like protein [Source:EMBL;Acc:AEE31544.1]	AT1G32960 AT1G32960.1 Subtilase family protein;(source:Araport11) protein_coding (SBT3.3) (SBT3.3); (ATSBT3.3)
AT4G24110	-1.03747	-0.0530639	down	2.54535	1.34786	up	-1.91466	-0.93709	down	2.10028	1.07058	up	AT4G24110	uncharacterized protein [Source:EMBL;Acc:AEE84851.1]	AT4G24110 AT4G24110.1 NADP-specific glutamate dehydrogenase;(source:Araport11) protein_coding
AT3G25870	1.51471	0.59904	up	2.54333	1.34672	up	1.49896	0.583965	up	1.35964	0.443221	up	AT3G25870	uncharacterized protein [Source:EMBL;Acc:AEE77081.1]	AT3G25870 AT3G25870.1 hypothetical protein;(source:Araport11) protein_coding
AT2G11330	1.89065	0.918885	up	2.54106	1.34543	up	1.89065	0.918885	up	2.69022	1.42772	up	AT2G11330	transposable element gene.[Source:TAIR;Acc:AT2G11330]	AT2G11330 AT2G11330.1 transposable_element_gene;(source:Araport11);Mutator-like transposase family, has a 5.3e-78 P-value blast match to Q9ZQM3 /24-192 Pfam PF03108 MuDR family transposase (MuDr-element domain);(source:TAIR10) transposable_element_gene
AT5G35580	2.1689	1.11696	up	2.5377	1.34352	up	2.28822	1.19422	up	1.90437	0.929314	up	AT5G35580	kinase-like protein [Source:EMBL;Acc:AED93983.1]	AT5G35580 AT5G35580.1 Protein kinase superfamily protein;(source:Araport11) protein_coding (PBL13) (PBL13)
AT5G61250	1.70603	0.770645	up	2.53687	1.34305	up	1.97056	0.978603	up	2.69687	1.43129	up	AtGUS1	Heparanase-like protein 2 [Source:EMBL;Acc:AED97443.1]	AT5G61250 AT5G61250.2 Belongs to the plant glycoside hydrolase family 79. Encodes a protein with several posttranslational modification sites including O-&#946;-GlcNAc attachment sites and serine-, threonine- and tyrosine-phosphorylation sites, suggesting that this protein is extensively modified posttranslationally. The protein is predicted (WoLF PSORT program) to be secreted. protein_coding GLU…
AT3G04060	3.03627	1.6023	up	2.53215	1.34036	up	1.04212	0.059525	up	1.3959	0.481193	up	anac046	NAC domain containing protein 46 [Source:EMBL;Acc:AEE74032.1]	AT3G04060 AT3G04060.1 NAC046 is a member of the NAC domain containing family of transcription factors. It was identified in a screen for regulators of chlorophyll protein gene expression. Mutants in NAC046 have delayed senescence and increased CHL content suggesting a role in regulation of senescence and chlorophyll degradation. protein_coding NAC DOMAIN CONTAINING PROTEIN 46 (NAC046) NAC DOMAIN …
AT4G11840	2.76904	1.46939	up	2.52939	1.33879	up	3.03127	1.59992	up	2.64801	1.40491	up	PLDGAMMA3	phospholipase D gamma 3 [Source:EMBL;Acc:AEE83056.1]	AT4G11840 AT4G11840.1 member of C2-PLD subfamily protein_coding PHOSPHOLIPASE D GAMMA 3 (PLDGAMMA3) PHOSPHOLIPASE D GAMMA 3 (PLDGAMMA3)
AT2G26740	1.91056	0.933994	up	2.52807	1.33803	up	1.48739	0.572784	up	2.1486	1.1034	up	ATSEH	soluble epoxide hydrolase [Source:EMBL;Acc:AEC07881.1]	AT2G26740 AT2G26740.1 Encodes a soluble epoxide hydrolase whose expression is induced by auxin and water stress. protein_coding SOLUBLE EPOXIDE HYDROLASE (SEH) SOLUBLE EPOXIDE HYDROLASE (SEH);SOLUBLE EPOXIDE HYDROLASE (ATSEH)
AT1G14170	1.51767	0.601853	up	2.52242	1.33481	up	2.10226	1.07194	up	1.94123	0.956974	up	AT1G14170	RNA-binding KH domain-containing protein [Source:EMBL;Acc:AEE29116.1]	AT1G14170 AT1G14170.3 RNA-binding KH domain-containing protein;(source:Araport11) protein_coding
AT5G46350	1.18375	0.243363	up	2.52233	1.33476	up	-1.52968	-0.613227	down	-1.17522	-0.23293	down	WRKY8	putative WRKY transcription factor 8 [Source:EMBL;Acc:AED95372.1]	AT5G46350 AT5G46350.1 member of WRKY Transcription Factor; Group II-c protein_coding WRKY DNA-BINDING PROTEIN 8 (WRKY8) WRKY DNA-BINDING PROTEIN 8 (WRKY8);ARABIDOPSIS THALIANA WRKY DNA-BINDING PROTEIN 8 (ATWRKY8)
AT1G08310	1.08328	0.115405	up	2.52045	1.33368	up	-2.21494	-1.14727	down	1.27917	0.355213	up	AT1G08310	esterase/lipase/thioesterase-like protein [Source:EMBL;Acc:AEE28272.1]	AT1G08310 AT1G08310.2 alpha/beta-Hydrolases superfamily protein;(source:Araport11) protein_coding
AT1G51860	1.79443	0.843529	up	2.51964	1.33322	up	2.52173	1.33441	up	2.04416	1.03151	up	AT1G51860	putative LRR receptor-like serine/threonine-protein kinase [Source:EMBL;Acc:AEE32726.1]	AT1G51860 AT1G51860.1 Leucine-rich repeat protein kinase family protein;(source:Araport11) protein_coding
AT3G49120	2.2513	1.17076	up	2.51789	1.33222	up	1.9336	0.951288	up	2.26137	1.1772	up	ATPCB	peroxidase 34 [Source:EMBL;Acc:AEE78501.1]	AT3G49120 AT3G49120.1 Class III peroxidase Perx34. Expressed in roots, leaves and stems. Located in the cell wall. Involved in cell elongation. Expression activated by light. May play a role in generating H2O2 during defense response. The mRNA is cell-to-cell mobile. protein_coding PEROXIDASE CB (PRXCB) PEROXIDASE CB (PRXCB);PEROXIDASE 34 (PRX34);ARABIDOPSIS THALIANA PEROXIDASE CB (ATPCB);PEROXID…
AT4G09300	3.59094	1.84436	up	2.51526	1.33071	up	-1.27706	-0.352824	down	-1.39968	-0.485097	down	AT4G09300	LisH and RanBPM domain-containing protein [Source:EMBL;Acc:AEE82740.1]	AT4G09300 AT4G09300.1 LisH and RanBPM domains containing protein;(source:Araport11) protein_coding
AT1G14260	1.96243	0.972643	up	2.51493	1.33052	up	2.35601	1.23634	up	2.49893	1.32131	up	AT1G14260	RING/FYVE/PHD zinc finger-containing protein [Source:EMBL;Acc:AEE29133.1]	AT1G14260 AT1G14260.1 RING/FYVE/PHD zinc finger superfamily protein;(source:Araport11) protein_coding
AT3G60176	-1.01154	-0.0165466	down	2.51432	1.33017	up	-1.26016	-0.333611	down	-1.09565	-0.131788	down	AT3G60176	other RNA.[Source:TAIR;Acc:AT3G60176]	AT3G60176 AT3G60176.1 other_RNA;(source:Araport11) other_rna
AT3G59570	2.31956	1.21385	up	2.50954	1.32742	up	2.4746	1.30719	up	2.07298	1.05171	up	AT3G59570	RabGAP/TBC domain-containing protein [Source:EMBL;Acc:AEE79940.1]	AT3G59570 AT3G59570.1 Ypt/Rab-GAP domain of gyp1p superfamily protein;(source:Araport11) protein_coding
AT4G37030	2.14903	1.10369	up	2.50848	1.32681	up	-3.81292	-1.9309	down	-4.72017	-2.23884	down	AT4G37030	uncharacterized protein [Source:EMBL;Acc:AEE86739.1]	AT4G37030 AT4G37030.1 membrane protein;(source:Araport11) protein_coding
AT4G21730	-1.07991	-0.110906	down	2.50831	1.32672	up	1.21191	0.277288	up	1.30126	0.379907	up	AT4G21730	pseudogene.[Source:TAIR;Acc:AT4G21730]	AT4G21730 AT4G21730.1 pseudogene of N-ethylmaleimide sensitive factor (NSF) pseudogene
AT3G16990	2.05077	1.03616	up	2.50535	1.32501	up	1.74367	0.802129	up	1.90195	0.927481	up	AT3G16990	heme oxygenase-like, multi-helical protein [Source:EMBL;Acc:AEE75892.1]	AT3G16990 AT3G16990.1 heme oxygenase-like, multi-helical;(source:Araport11) protein_coding
AT4G23130	1.65124	0.723554	up	2.50489	1.32475	up	3.72594	1.8976	up	3.67559	1.87798	up	CRK5	cysteine-rich receptor-like protein kinase 5 [Source:EMBL;Acc:AEE84713.1]	AT4G23130 AT4G23130.2 Encodes a receptor-like protein kinase. Naming convention from Chen et al 2003 (PMID 14756307) protein_coding CYSTEINE-RICH RLK (RECEPTOR-LIKE PROTEIN KINASE) 5 (CRK5) RECEPTOR-LIKE PROTEIN KINASE 6 (RLK6);CYSTEINE-RICH RLK (RECEPTOR-LIKE PROTEIN KINASE) 5 (CRK5)
AT1G72280	1.99502	0.996405	up	2.504	1.32423	up	1.49838	0.583402	up	1.26318	0.337057	up	AERO1	endoplasmic oxidoreductin-1 [Source:EMBL;Acc:AEE35298.1]	AT1G72280 AT1G72280.1 endoplasmic reticulum oxidoreductin protein_coding ENDOPLASMIC RETICULUM OXIDOREDUCTINS 1 (ERO1) ENDOPLASMIC RETICULUM OXIDOREDUCTINS 1 (ERO1);ENDOPLASMIC RETICULUM OXIDOREDUCTINS 1 (AERO1)
AT3G49130	3.32489	1.73331	up	2.50249	1.32337	up	2.1442	1.10044	up	2.46432	1.30119	up	AT3G49130	SWAP (Suppressor-of-White-APricot)/surp RNA-binding domain-containing protein [Source:EMBL;Acc:AEE78502.1]	AT3G49130 AT3G49130.1 SWAP (Suppressor-of-White-APricot)/surp RNA-binding domain-containing protein;(source:Araport11) protein_coding
AT1G07160	2.19859	1.13658	up	2.50008	1.32198	up	-2.48241	-1.31174	down	-4.31065	-2.1079	down	AT1G07160	putative protein phosphatase 2C 2 [Source:EMBL;Acc:AEE28084.1]	AT1G07160 AT1G07160.1 Protein phosphatase 2C family protein;(source:Araport11) protein_coding
AT1G59660	2.94784	1.55966	up	2.4987	1.32118	up	-1.58862	-0.667773	down	-1.62648	-0.701756	down	AT1G59660	Nucleoporin autopeptidase [Source:EMBL;Acc:AEE33600.1]	AT1G59660 AT1G59660.1 Encodes a protein with similarity to mammalian nucleoporin Nup98.Its expression is upregulated in mutants that are NUP deficient. protein_coding DRA2-LIKE (DRAL) DRA2-LIKE (DRAL)
AT2G27690	2.63014	1.39514	up	2.49648	1.31989	up	4.66613	2.22223	up	4.11356	2.04039	up	CYP94C1	cytochrome P450, family 94, subfamily C, polypeptide 1 [Source:EMBL;Acc:AEC08026.1]	AT2G27690 AT2G27690.1 Encodes a CYP94C1. Has highest omega-hydroxylase activity with 9,10-epoxystearic acid, while also metabolized lauric acid (C12:0) and C18 unsaturated fatty acids. Gene expression is induced in response to wounding and jasmonic acid treatment. protein_coding "CYTOCHROME P450, FAMILY 94, SUBFAMILY C, POLYPEPTIDE 1" (CYP94C1) "CYTOCHROME P450, FAMILY 94, SUBFAMILY C, POLYPEPTID…
AT5G64190	6.50622	2.70182	up	2.49508	1.31909	up	1.16457	0.219801	up	2.0531	1.0378	up	AT5G64190	uncharacterized protein [Source:EMBL;Acc:AED97852.1]	AT5G64190 AT5G64190.1 neuronal PAS domain protein;(source:Araport11) protein_coding
AT3G10040	1.38588	0.4708	up	2.4923	1.31748	up	-1.74636	-0.804347	down	7.67179	2.93956	up	AT3G10040	sequence-specific DNA binding transcription factor [Source:EMBL;Acc:AEE74853.1]	AT3G10040 AT3G10040.1 Encodes HRA1 (HYPOXIA RESPONSE ATTENUATOR1), a low oxygen-inducible transcription factor. protein_coding HYPOXIA RESPONSE ATTENUATOR1 (HRA1) HYPOXIA RESPONSE ATTENUATOR1 (HRA1)
AT1G52290	2.65471	1.40855	up	2.48914	1.31565	up	4.68123	2.22689	up	3.21275	1.68381	up	AT1G52290	protein kinase-like protein [Source:EMBL;Acc:AEE32778.1]	AT1G52290 AT1G52290.1 Encodes a member of the proline-rich extensin-like receptor kinase (PERK) family. This family consists of 15 predicted receptor kinases (PMID: 15653807). protein_coding PROLINE-RICH EXTENSIN-LIKE RECEPTOR KINASE 15 (PERK15) PROLINE-RICH EXTENSIN-LIKE RECEPTOR KINASE 15 (AtPERK15);PROLINE-RICH EXTENSIN-LIKE RECEPTOR KINASE 15 (PERK15)
AT2G07773	1.67833	0.747029	up	2.4886	1.31533	up	1.45877	0.544753	up	2.27138	1.18357	up	AT2G07773	uncharacterized protein [Source:EMBL;Acc:AEC06059.1]	AT2G07773 AT2G07773.1 cytochrome B/B6 protein;(source:Araport11) protein_coding
AT2G10560	1.37309	0.457423	up	2.48781	1.31488	up	1.54015	0.62307	up	1.46576	0.551644	up	AT2G10560	uncharacterized protein [Source:EMBL;Acc:AEC06150.1]	AT2G10560 AT2G10560.1 chaperone;(source:Araport11) protein_coding
AT4G01070	1.82662	0.869174	up	2.48753	1.31471	up	1.24448	0.31554	up	1.18578	0.245834	up	GT72B1	hydroquinone glucosyltransferase [Source:EMBL;Acc:AEE81977.1]	AT4G01070 AT4G01070.1 the glycosyltransferase (UGT72B1) is involved in metabolizing xenobiotica (chloroaniline and chlorophenole). Comparison between wild type and knock-out mutant demonstrates the central role of this gene for metabolizing chloroaniline but significantly less for chlorophenole. The glucosyltransferase preferred UDP-xylose over UDP-glucose indicating its (additional) functioning …
AT2G34500	3.84832	1.94423	up	2.4863	1.314	up	-1.29047	-0.367901	down	-3.54571	-1.82607	down	CYP710A1	cytochrome P450, family 710, subfamily A [Source:EMBL;Acc:AEC08982.1]	AT2G34500 AT2G34500.1 Encodes a protein with C22-sterol desaturase activity. The enzyme was shown to catalyze in the presence of NADPH the conversion of &beta;-sitosterol to stigmasterol, but not that of 24-<i>epi</i>-campesterol to brassicasterol (unlike CYP710A2). protein_coding CYTOCHROME P450, FAMILY 710, SUBFAMILY A, POLYPEPTIDE 1 (CYP710A1) CYTOCHROME P450, FAMILY 710, SUBFAMILY A, POLYPEPT…
AT1G66970	3.01044	1.58997	up	2.48608	1.31387	up	3.94335	1.97942	up	3.09933	1.63195	up	SVL2	putative glycerophosphoryl diester phosphodiesterase 3 [Source:EMBL;Acc:AEE34580.1]	AT1G66970 AT1G66970.2 Encodes a member of the glycerophosphodiester phosphodiesterase like (GDPD-like) family. protein_coding SHV3-LIKE 2 (SVL2) GLYCEROPHOSPHODIESTER PHOSPHODIESTERASE (GDPD) LIKE 1 (GDPDL1);SHV3-LIKE 2 (SVL2)
AT1G17020	2.69493	1.43025	up	2.48498	1.31324	up	-1.16532	-0.220723	down	1.36299	0.446779	up	SRG1	protein SRG1 [Source:EMBL;Acc:AEE29531.1]	AT1G17020 AT1G17020.1 Encodes a novel member of the Fe(II)/ascorbate oxidase gene family; senescence-related gene. protein_coding SENESCENCE-RELATED GENE 1 (SRG1) SENESCENCE-RELATED GENE 1 (ATSRG1);SENESCENCE-RELATED GENE 1 (SRG1)
AT1G32880	1.16993	0.226425	up	2.48443	1.31291	up	-3.98884	-1.99597	down	-4.83507	-2.27354	down	AT1G32880	armadillo/beta-catenin-like repeats-containing protein [Source:EMBL;Acc:AEE31536.1]	AT1G32880 AT1G32880.1 ARM repeat superfamily protein;(source:Araport11) protein_coding
AT5G25440	1.54141	0.624252	up	2.48338	1.3123	up	2.05914	1.04204	up	2.55024	1.35063	up	AT5G25440	protein kinase family protein [Source:EMBL;Acc:AED93443.1]	AT5G25440 AT5G25440.1 Protein kinase superfamily protein;(source:Araport11) protein_coding
AT2G39210	1.77845	0.830617	up	2.47994	1.3103	up	2.6324	1.39638	up	1.9216	0.942306	up	AT2G39210	major facilitator protein [Source:EMBL;Acc:AEC09646.1]	AT2G39210 AT2G39210.1 Major facilitator superfamily protein;(source:Araport11) protein_coding
AT5G49680	3.43484	1.78024	up	2.4777	1.309	up	4.8399	2.27498	up	2.59781	1.3773	up	AT5G49680	putative cell expansion protein [Source:EMBL;Acc:AED95844.1]	AT5G49680 AT5G49680.2 Conserved among eukaryotes, similar to Arabidopsis SABRE. The phenotype of the kip/sab double mutant suggests related functions for both genes, however, the KIP protein is mostly required for tip-growth. Predicted to be targeted to the secretory pathway. mRNA was detected in all organs, with most abundance in pollen and roots. protein_coding
AT1G32950	7.53332	2.91329	up	2.47753	1.3089	up	-1.12955	-0.175751	down	-2.23557	-1.16064	down	AT1G32950	Subtilase-like protein [Source:EMBL;Acc:AEE31543.1]	AT1G32950 AT1G32950.1 Subtilase family protein;(source:Araport11) protein_coding
AT3G51890	2.2108	1.14457	up	2.47448	1.30713	up	1.60734	0.684671	up	2.15542	1.10797	up	AT3G51890	Clathrin light chain protein [Source:EMBL;Acc:AEE78859.1]	AT3G51890 AT3G51890.1 Clathrin light chain protein;(source:Araport11) protein_coding CLATHRIN LIGHT CHAIN 3 (CLC3) CLATHRIN LIGHT CHAIN 3 (CLC3)
AT3G08870	2.8864	1.52927	up	2.46413	1.30108	up	2.87735	1.52474	up	1.73436	0.794407	up	AT3G08870	concanavalin A-like lectin protein kinase-like protein [Source:EMBL;Acc:AEE74689.1]	AT3G08870 AT3G08870.1 Concanavalin A-like lectin protein kinase family protein;(source:Araport11) protein_coding L-TYPE LECTIN RECEPTOR KINASE VI.1 (LECRK-VI.1) L-TYPE LECTIN RECEPTOR KINASE VI.1 (LECRK-VI.1)
AT3G26600	2.50963	1.32747	up	2.46392	1.30095	up	1.85252	0.889488	up	1.39779	0.483144	up	ARO4	armadillo repeat only 4 protein [Source:EMBL;Acc:AEE77184.1]	AT3G26600 AT3G26600.1 Armadillo repeat protein. One of a family of four in Arabidopsis. Expressed in vegetative tissues, anthers and ovules. protein_coding ARMADILLO REPEAT ONLY 4 (ARO4) ARMADILLO REPEAT ONLY 4 (ARO4)
AT3G15340	1.84703	0.885211	up	2.4622	1.29995	up	1.06404	0.0895577	up	1.04505	0.0635724	up	PPI2	proton pump interactor 2 [Source:EMBL;Acc:AEE75644.1]	AT3G15340 AT3G15340.1 Encodes PPI2 (proton pump interactor 2), a homologue of PPI1, a protein that interacts with the plasma membrane H+ ATPase AHA1. protein_coding PROTON PUMP INTERACTOR 2 (PPI2) PROTON PUMP INTERACTOR 2 (PPI2)
AT5G49860	2.0017	1.00122	up	2.46063	1.29903	up	2.0017	1.00122	up	2.46063	1.29903	up	AT5G49860	jacalin lectin family protein [Source:EMBL;Acc:AED95865.1]	AT5G49860 AT5G49860.1 Mannose-binding lectin superfamily protein;(source:Araport11) protein_coding
AT5G19875	2.0247	1.01771	up	2.45898	1.29806	up	2.39679	1.2611	up	3.5147	1.8134	up	AT5G19875	uncharacterized protein [Source:EMBL;Acc:AED92760.1]	AT5G19875 AT5G19875.1 transmembrane protein;(source:Araport11) protein_coding
AT2G45570	3.71881	1.89484	up	2.45678	1.29677	up	-1.39904	-0.484435	down	-1.895	-0.922197	down	CYP76C2	cytochrome P450 76C2 [Source:EMBL;Acc:AEC10572.1]	AT2G45570 AT2G45570.1 member of CYP76C protein_coding "CYTOCHROME P450, FAMILY 76, SUBFAMILY C, POLYPEPTIDE 2" (CYP76C2) "CYTOCHROME P450, FAMILY 76, SUBFAMILY C, POLYPEPTIDE 2" (CYP76C2)
AT1G16260	3.33631	1.73826	up	2.45572	1.29614	up	3.38354	1.75853	up	2.39601	1.26064	up	AT1G16260	wall-associated receptor kinase-like 8 [Source:EMBL;Acc:AEE29428.1]	AT1G16260 AT1G16260.1 Wall-associated kinase family protein;(source:Araport11) protein_coding
AT2G07669	1.17106	0.227814	up	2.45346	1.29482	up	1.08251	0.114381	up	1.49771	0.582758	up	AT2G07669	uncharacterized protein [Source:EMBL;Acc:AEC06074.1]	AT2G07669 AT2G07669.1 hypothetical protein;(source:Araport11) protein_coding
AT1G08940	1.46942	0.555248	up	2.45196	1.29394	up	-1.27058	-0.345482	down	1.08687	0.120181	up	AT1G08940	Phosphoglycerate mutase-like protein [Source:EMBL;Acc:AEE28372.1]	AT1G08940 AT1G08940.1 Phosphoglycerate mutase family protein;(source:Araport11) protein_coding
AT4G08555	1.77196	0.825346	up	2.44286	1.28857	up	-2.79958	-1.48521	down	-2.21845	-1.14955	down	AT4G08555	uncharacterized protein [Source:EMBL;Acc:AEE82657.1]	AT4G08555 AT4G08555.1 hypothetical protein;(source:Araport11) protein_coding
AT3G13910	1.22171	0.288897	up	2.44262	1.28843	up	1.14226	0.191892	up	2.02487	1.01783	up	AT3G13910	uncharacterized protein [Source:EMBL;Acc:AEE75437.1]	AT3G13910 AT3G13910.1 hypothetical protein (DUF3511);(source:Araport11) protein_coding
AT1G12990	2.3312	1.22107	up	2.44078	1.28734	up	2.25871	1.1755	up	2.53367	1.34123	up	AT1G12990	beta-1,4-mannosyl-glycoprotein [Source:EMBL;Acc:AEE28957.1]	AT1G12990 AT1G12990.1 beta-1,4-N-acetylglucosaminyltransferase family protein;(source:Araport11) protein_coding
AT5G49570	1.96325	0.973246	up	2.43571	1.28434	up	2.04337	1.03095	up	2.1892	1.1304	up	AtPNG1	peptide-N(4)-(N-acetyl-beta-glucosaminyl)asparagine amidase [Source:EMBL;Acc:AED95831.1]	AT5G49570 AT5G49570.1 Encodes a protein that has peptide:N-glycanase activity in enzymatic assay in heterologous systems (although the activity was not detected in wild-type plants). protein_coding PEPTIDE-N-GLYCANASE 1 (PNG1) PEPTIDE-N-GLYCANASE 1 (AtPNG1);PEPTIDE-N-GLYCANASE 1 (PNG1)
AT1G51620	1.30887	0.388319	up	2.43522	1.28405	up	1.36841	0.452496	up	1.73974	0.798876	up	AT1G51620	protein kinase domain-containing protein [Source:EMBL;Acc:AEE32691.1]	AT1G51620 AT1G51620.2 Protein kinase superfamily protein;(source:Araport11) protein_coding
AT1G17330	1.59885	0.677036	up	2.43176	1.282	up	1.57905	0.659055	up	2.09011	1.06358	up	AT1G17330	Metal-dependent phosphohydrolase [Source:EMBL;Acc:AEE29573.1]	AT1G17330 AT1G17330.1 Metal-dependent phosphohydrolase;(source:Araport11) protein_coding
AT1G53920	1.65767	0.729157	up	2.43107	1.28159	up	2.05223	1.03719	up	1.83743	0.877691	up	GLIP5	GDSL esterase/lipase 5 [Source:EMBL;Acc:AEE33025.1]	AT1G53920 AT1G53920.1 Contains lipase signature motif and GDSL domain. protein_coding GDSL-MOTIF LIPASE 5 (GLIP5) GDSL-MOTIF LIPASE 5 (GLIP5)
AT2G16595	1.91217	0.935209	up	2.42923	1.2805	up	1.50082	0.585746	up	1.8143	0.859416	up	AT2G16595	Translocon-associated protein (TRAP), alpha subunit [Source:EMBL;Acc:AEC06516.1]	AT2G16595 AT2G16595.1 Translocon-associated protein (TRAP), alpha subunit;(source:Araport11) protein_coding
AT1G66880	1.95535	0.967429	up	2.42778	1.27964	up	1.75463	0.81117	up	1.35924	0.442797	up	AT1G66880	protein kinase domain-containing protein [Source:EMBL;Acc:AEE34567.1]	AT1G66880 AT1G66880.1 Protein kinase superfamily protein;(source:Araport11) protein_coding
AT1G01150	3.27471	1.71137	up	2.4275	1.27947	up	1.88987	0.918283	up	5.97489	2.57891	up	AT1G01150	Homeodomain-like protein with RING/FYVE/PHD-type zinc finger domain [Source:EMBL;Acc:AEE27246.1]	AT1G01150 AT1G01150.1 Homeodomain-like protein with RING/FYVE/PHD-type zinc finger domain-containing protein;(source:Araport11) protein_coding
AT5G52810	1.74016	0.799219	up	2.42681	1.27906	up	2.15894	1.11032	up	2.18337	1.12655	up	AT5G52810	Rossmann-fold NAD(P)-binding domain-containing protein [Source:EMBL;Acc:AED96264.1]	AT5G52810 AT5G52810.1 NAD(P)-binding Rossmann-fold superfamily protein;(source:Araport11) protein_coding SAR DEFICIENT 4 (SARD4) SAR DEFICIENT 4 (SARD4)
AT5G17760	2.14302	1.09965	up	2.42268	1.2766	up	1.62517	0.70059	up	1.71135	0.775138	up	AT5G17760	AAA-type ATPase family protein [Source:EMBL;Acc:AED92465.1]	AT5G17760 AT5G17760.1 P-loop containing nucleoside triphosphate hydrolases superfamily protein;(source:Araport11) protein_coding
AT4G01920	1.94887	0.962634	up	2.41947	1.27469	up	2.73441	1.45123	up	1.90976	0.933393	up	AT4G01920	cysteine/histidine-rich C1 domain-containing protein [Source:EMBL;Acc:AEE82099.1]	AT4G01920 AT4G01920.1 Cysteine/Histidine-rich C1 domain family protein;(source:Araport11) protein_coding
AT5G47120	1.796	0.844789	up	2.41815	1.27391	up	1.19457	0.256495	up	1.20389	0.267701	up	ATBI-1	BAX inhibitor 1 [Source:EMBL;Acc:AED95473.1]	AT5G47120 AT5G47120.1 Encodes BI-1, a homolog of mammalian Bax inhibitor 1. Functions as an attenuator of biotic and abiotic types of cell death. Bax-induced cell death can be downregulated by ectopically expressing AtBI in planta. The mRNA is cell-to-cell mobile. protein_coding BAX INHIBITOR 1 (BI1) ARABIDOPSIS BAX INHIBITOR 1 (ATBI-1);BAX INHIBITOR 1 (BI1);BAX INHIBITOR 1 (ATBI1); (BI-1)
AT3G08970	1.95025	0.963659	up	2.41452	1.27174	up	1.1932	0.254832	up	-1.1821	-0.241348	down	ATERDJ3A	DnaJ domain-containing protein [Source:EMBL;Acc:AEE74703.1]	AT3G08970 AT3G08970.1 J domain protein localized in ER lumen. Can compensate for the growth defect in jem1 scj1 mutant yeast. Also shows similarity to HSP40 proteins and is induced by heat stress. At high temperatures, mutant alleles are not transmitted through the pollen due to defects in pollen tube growth. protein_coding (ATERDJ3A) (ATERDJ3A);THERMOSENSITIVE MALE STERILE 1 (TMS1)
AT3G21351	1.30982	0.389373	up	2.41392	1.27138	up	1.28538	0.362194	up	1.73393	0.794048	up	AT3G21351	uncharacterized protein [Source:EMBL;Acc:AEE76498.1]	AT3G21351 AT3G21351.1 transmembrane protein;(source:Araport11) protein_coding
AT2G37750	1.26162	0.335273	up	2.41056	1.26937	up	-1.09775	-0.134549	down	2.30133	1.20247	up	AT2G37750	uncharacterized protein [Source:EMBL;Acc:AEC09442.1]	AT2G37750 AT2G37750.1 hypothetical protein;(source:Araport11) protein_coding
AT1G56710	1.25943	0.332766	up	2.40524	1.26618	up	-1.48323	-0.568746	down	1.06503	0.0908906	up	AT1G56710	pectin lyase-like protein [Source:EMBL;Acc:AEE33427.1]	AT1G56710 AT1G56710.1 Pectin lyase-like superfamily protein;(source:Araport11) protein_coding
AT5G45480	2.04508	1.03216	up	2.40186	1.26415	up	2.61608	1.38741	up	1.78257	0.833962	up	AT5G45480	uncharacterized protein [Source:EMBL;Acc:AED95257.1]	AT5G45480 AT5G45480.1 transmembrane protein, putative (DUF594);(source:Araport11) protein_coding
AT3G49570	3.40193	1.76635	up	2.39993	1.26299	up	-1.23076	-0.299551	down	1.2449	0.316028	up	LSU3	response to low sulfur 3 protein [Source:EMBL;Acc:AEE78558.1]	AT3G49570 AT3G49570.1 response to low sulfur 3;(source:Araport11) protein_coding RESPONSE TO LOW SULFUR 3 (LSU3) RESPONSE TO LOW SULFUR 3 (LSU3)
AT2G16430	1.74602	0.804066	up	2.39779	1.2617	up	1.65289	0.724987	up	1.53687	0.619994	up	PAP10	purple acid phosphatase 10 [Source:EMBL;Acc:AEC06495.1]	AT2G16430 AT2G16430.2 purple acid phosphatase 10;(source:Araport11) protein_coding PURPLE ACID PHOSPHATASE 10 (PAP10) (ATPAP10);PURPLE ACID PHOSPHATASE 10 (PAP10)
AT1G67820	1.29266	0.370348	up	2.39397	1.2594	up	-1.47326	-0.559015	down	1.03776	0.0534668	up	AT1G67820	putative protein phosphatase 2C 14 [Source:EMBL;Acc:AEE34702.1]	AT1G67820 AT1G67820.1 Protein phosphatase 2C family protein;(source:Araport11) protein_coding
AT1G68390	2.06974	1.04945	up	2.39099	1.25761	up	-1.8817	-0.912035	down	-2.47378	-1.30672	down	AT1G68390	Core-2/I-branching beta-1,6-N-acetylglucosaminyltransferase family protein [Source:EMBL;Acc:AEE34788.1]	AT1G68390 AT1G68390.1 Core-2/I-branching beta-1,6-N-acetylglucosaminyltransferase family protein;(source:Araport11) protein_coding
AT2G44383	3.1354	1.64865	up	2.39017	1.25711	up	2.29318	1.19735	up	2.88008	1.52611	up	AT2G44383	Pseudogene of AT2G44400DC1 domain-containing protein.[Source:TAIR;Acc:AT2G44383]	AT2G44383 AT2G44383.1 Pseudogene of AT2G44400; DC1 domain-containing protein pseudogene
AT4G23160	2.09138	1.06445	up	2.38359	1.25314	up	3.58744	1.84296	up	2.49423	1.3186	up	CRK8	cysteine-rich receptor-like protein kinase 8 [Source:EMBL;Acc:AEE84717.1]	AT4G23160 AT4G23160.1 Encodes a cysteine-rich receptor-like protein kinase. protein_coding CYSTEINE-RICH RLK (RECEPTOR-LIKE PROTEIN KINASE) 8 (CRK8) CYSTEINE-RICH RLK (RECEPTOR-LIKE PROTEIN KINASE) 8 (CRK8)
AT1G13340	1.84039	0.880012	up	2.37909	1.25041	up	-1.04447	-0.0627766	down	1.3051	0.384163	up	AT1G13340	Regulator of Vps4 activity in the MVB pathway protein [Source:EMBL;Acc:AEE29002.1]	AT1G13340 AT1G13340.1 Regulator of Vps4 activity in the MVB pathway protein;(source:Araport11) protein_coding IST1-LIKE 6 (ISTL6) IST1-LIKE 6 (ISTL6)
AT5G62480	1.63589	0.710079	up	2.37649	1.24883	up	-1.51261	-0.597041	down	-2.2843	-1.19175	down	ATGSTU9	glutathione S-transferase tau 9 [Source:EMBL;Acc:AED97612.1]	AT5G62480 AT5G62480.1 Encodes glutathione transferase belonging to the tau class of GSTs. Naming convention according to Wagner et al. (2002). protein_coding GLUTATHIONE S-TRANSFERASE TAU 9 (GSTU9) GLUTATHIONE S-TRANSFERASE TAU 9 (ATGSTU9);GLUTATHIONE S-TRANSFERASE TAU 9 (GSTU9);GLUTATHIONE S-TRANSFERASE 14B (GST14B);GLUTATHIONE S-TRANSFERASE 14 (GST14)
AT1G27020	1.34364	0.426146	up	2.37414	1.2474	up	1.49327	0.578479	up	2.13167	1.09198	up	AT1G27020	uncharacterized protein [Source:EMBL;Acc:AEE30769.1]	AT1G27020 AT1G27020.1 plant/protein;(source:Araport11) protein_coding
AT5G52640	2.70697	1.43668	up	2.36852	1.24399	up	-1.03066	-0.0435648	down	-1.45453	-0.540556	down	AtHsp90-1	heat shock protein 81-1 [Source:EMBL;Acc:AED96244.1]	AT5G52640 AT5G52640.1 Encodes a cytosolic heat shock protein AtHSP90.1. AtHSP90.1 interacts with disease resistance signaling components SGT1b and RAR1 and is required for RPS2-mediated resistance. The mRNA is cell-to-cell mobile. protein_coding HEAT SHOCK PROTEIN 90.1 (HSP90.1) HEAT SHOCK PROTEIN 81-1 (HSP81-1); (ATHS83); (HSP81.1);HEAT SHOCK PROTEIN 90.1 (HSP90.1);HEAT SHOCK PROTEIN 90.1 (ATHSP…
AT5G63990	1.86833	0.901747	up	2.36575	1.2423	up	1.83444	0.875338	up	2.28638	1.19307	up	AT5G63990	putative SAL3 phosphatase [Source:EMBL;Acc:AED97826.1]	AT5G63990 AT5G63990.1 Inositol monophosphatase family protein;(source:Araport11) protein_coding
AT4G23470	1.62039	0.69634	up	2.36191	1.23995	up	1.45369	0.539723	up	1.66702	0.737271	up	AT4G23470	PLAC8 family protein [Source:EMBL;Acc:AEE84763.1]	AT4G23470 AT4G23470.1 PLAC8 family protein;(source:Araport11) protein_coding
AT1G52770	2.58526	1.37031	up	2.36108	1.23945	up	2.12075	1.08457	up	1.83303	0.874231	up	AT1G52770	phototropic-responsive NPH3-like protein [Source:EMBL;Acc:AEE32850.1]	AT1G52770 AT1G52770.1 Phototropic-responsive NPH3 family protein;(source:Araport11) protein_coding
AT2G26290	1.89524	0.922379	up	2.35673	1.23679	up	-1.02409	-0.034337	down	-1.00104	-0.00150204	down	ARSK1	root-specific kinase 1 [Source:EMBL;Acc:AEC07819.1]	AT2G26290 AT2G26290.1 root-specific kinase 1;(source:Araport11) protein_coding ROOT-SPECIFIC KINASE 1 (ARSK1) ROOT-SPECIFIC KINASE 1 (ARSK1)
AT4G29770	2.23343	1.15926	up	2.35614	1.23643	up	1.38236	0.467136	up	1.64825	0.720938	up	AT4G29770	uncharacterized protein [Source:EMBL;Acc:AEE85673.1]	AT4G29770 AT4G29770.2 Target of trans acting-siR480/255. Testing. protein_coding HEAT-INDUCED TAS1 TARGET 1 (HTT1) HEAT-INDUCED TAS1 TARGET 1 (HTT1)
AT5G04840	1.66765	0.737818	up	2.35483	1.23562	up	1.13993	0.188944	up	1.08957	0.123755	up	AT5G04840	bZIP protein [Source:EMBL;Acc:AED90793.1]	AT5G04840 AT5G04840.1 bZIP protein;(source:Araport11) protein_coding
AT3G05390	2.19331	1.13311	up	2.35334	1.23471	up	1.45058	0.536627	up	1.63065	0.705447	up	AT3G05390	uncharacterized protein [Source:EMBL;Acc:AEE74232.1]	AT3G05390 AT3G05390.1 S-adenosyl-L-methionine-dependent methyltransferase;(source:Araport11) protein_coding
AT1G51800	1.43012	0.51614	up	2.35215	1.23398	up	1.291	0.36849	up	-1.0798	-0.110763	down	AT1G51800	putative leucine-rich repeat protein kinase [Source:EMBL;Acc:AEE32717.1]	AT1G51800 AT1G51800.1 The gene encodes a putative member of the LRR-RLK protein family. Expressin and mutant analysis revealed that it contributes to the interaction between Arabidopsis and Hyaloperonospora arabidopsidis. and The mRNA is cell-to-cell mobile. protein_coding IMPAIRED OOMYCETE SUSCEPTIBILITY 1 (IOS1) IMPAIRED OOMYCETE SUSCEPTIBILITY 1 (IOS1)
AT5G48440	1.47766	0.563314	up	2.35013	1.23274	up	1.73755	0.797056	up	2.10547	1.07414	up	AT5G48440	FAD-dependent oxidoreductase [Source:EMBL;Acc:AED95671.1]	AT5G48440 AT5G48440.1 FAD-dependent oxidoreductase family protein;(source:Araport11) protein_coding
AT5G05730	1.61503	0.691562	up	2.34875	1.23189	up	1.62137	0.697217	up	1.62374	0.699317	up	TRP5	anthranilate synthase component I-1 [Source:EMBL;Acc:AED90916.1]	AT5G05730 AT5G05730.2 ASA1 encodes the alpha subunit of anthranilate synthase, which catalyzes the rate-limiting step of tryptophan synthesis. ASA1 is induced by ethylene, and forms a link between ethylene signalling and auxin synthesis in roots. protein_coding ANTHRANILATE SYNTHASE ALPHA SUBUNIT 1 (ASA1) ANTHRANILATE SYNTHASE ALPHA SUBUNIT 1 (ASA1)
AT3G21720	5.72403	2.51703	up	2.34735	1.23103	up	-1.92626	-0.945805	down	-1.99443	-0.995977	down	ICL	isocitrate lyase [Source:EMBL;Acc:AEE76544.1]	AT3G21720 AT3G21720.1 Encodes a glyoxylate cycle enzyme isocitrate lyase (ICL). protein_coding ISOCITRATE LYASE (ICL) ISOCITRATE LYASE (ICL)
AT1G80610	1.7473	0.805131	up	2.34694	1.23078	up	1.42052	0.506423	up	2.37528	1.2481	up	AT1G80610	uncharacterized protein [Source:EMBL;Acc:AEE36427.1]	AT1G80610 AT1G80610.1 hypothetical protein;(source:Araport11) protein_coding
AT5G03360	2.03059	1.0219	up	2.34567	1.23	up	2.67216	1.41801	up	2.3331	1.22225	up	AT5G03360	DC1 domain-containing protein [Source:EMBL;Acc:AED90592.1]	AT5G03360 AT5G03360.1 cysteine/histidine-rich C1 domain protein;(source:Araport11) protein_coding
AT5G25820	2.17449	1.12068	up	2.3453	1.22977	up	1.42529	0.511257	up	1.26654	0.340896	up	AT5G25820	Exostosin family protein [Source:EMBL;Acc:AED93491.1]	AT5G25820 AT5G25820.1 Exostosin family protein;(source:Araport11) protein_coding
AT3G54640	1.17296	0.230157	up	2.34368	1.22878	up	1.11467	0.156615	up	1.49053	0.57583	up	TSA1	tryptophan synthase alpha chain [Source:EMBL;Acc:AEE79260.1]	AT3G54640 AT3G54640.1 Catalyzes the conversion of indole-3-glycerolphosphate to indole, the penultimate reaction in the biosynthesis of tryptophan. Functions as a heterocomplex with tryptophan synthase beta subunit (TSA2). protein_coding TRYPTOPHAN SYNTHASE ALPHA CHAIN (TSA1) TRYPTOPHAN SYNTHASE ALPHA CHAIN (TSA1);TRYPTOPHAN-REQUIRING 3 (TRP3)
AT3G21230	1.50692	0.591599	up	2.34037	1.22673	up	2.11316	1.0794	up	2.56657	1.35984	up	4CL5	4-coumarate--CoA ligase 4 [Source:EMBL;Acc:AEE76479.1]	AT3G21230 AT3G21230.1 The gene encodes a 4-coumarate coenzyme A ligase being able to use sinapate as substrate. The catalytic efficiency was in the following (descending) order: p-coumaric acid, caffeic acid, 5-OH-ferulic acid, ferulic acid and sinapic acid. At4CL5 was unable to use cinnamic acid as substrate. Knockout of At4CL5 (4cl5) revealed no effect on syringyl lignin content indicating that…
AT1G03990	1.54251	0.625281	up	2.32826	1.21925	up	1.30958	0.3891	up	1.3316	0.413159	up	AT1G03990	Long-chain fatty alcohol dehydrogenase-like protein [Source:EMBL;Acc:AEE27643.1]	AT1G03990 AT1G03990.1 Long-chain fatty alcohol dehydrogenase family protein;(source:Araport11) protein_coding
AT1G29160	1.59171	0.670577	up	2.32597	1.21784	up	1.33689	0.41888	up	2.08449	1.0597	up	AT1G29160	Dof zinc finger protein DOF1.5 [Source:EMBL;Acc:AEE31051.1]	AT1G29160 AT1G29160.1 Encodes a DOF transcription factor involved in seed coat development. protein_coding COGWHEEL1 (COG1) COGWHEEL1 (COG1)
AT4G23570	1.58095	0.66079	up	2.32336	1.21621	up	2.04103	1.0293	up	2.60135	1.37926	up	SGT1A	phosphatase SGT1a [Source:EMBL;Acc:AEE84777.1]	AT4G23570 AT4G23570.3 Closely related to SGT1B, may function in SCF(TIR1) mediated protein degradation. AtSGT1a and AtSGT1b are functionally redundant in the resistance to pathogenes. AtSGT1b was more highly expressed than AtSGT1. The N-terminal TPR domain of AtSGT1a reduces the steady-state level of Arabidopsis SGT1 proteins whereas the same domain from AtSGT1b enhances SGT1 accumulation. The TP…
AT2G13790	1.94288	0.958195	up	2.32312	1.21606	up	2.90652	1.53929	up	2.4173	1.2734	up	SERK4	somatic embryogenesis receptor kinase 4 [Source:EMBL;Acc:AEC06259.1]	AT2G13790 AT2G13790.1 somatic embryogenesis receptor-like kinase 4;(source:Araport11) protein_coding SOMATIC EMBRYOGENESIS RECEPTOR-LIKE KINASE 4 (SERK4) SOMATIC EMBRYOGENESIS RECEPTOR-LIKE KINASE 4 (ATSERK4);BRI1- ASSOCIATED KINASE 7 (BAK7);BAK1-LIKE 1 (BKK1);SOMATIC EMBRYOGENESIS RECEPTOR-LIKE KINASE 4 (SERK4)
AT2G28940	1.86738	0.901013	up	2.32023	1.21427	up	2.20199	1.13881	up	2.18218	1.12577	up	AT2G28940	protein kinase family protein [Source:EMBL;Acc:AEC08192.1]	AT2G28940 AT2G28940.2 Protein kinase superfamily protein;(source:Araport11) protein_coding
AT5G19650	2.07583	1.05369	up	2.3189	1.21344	up	2.96569	1.56837	up	3.33335	1.73697	up	ATOFP8	ovate family protein 8 [Source:EMBL;Acc:AED92734.1]	AT5G19650 AT5G19650.1 ovate family protein 8;(source:Araport11) protein_coding OVATE FAMILY PROTEIN 8 (OFP8) (ATOFP8);OVATE FAMILY PROTEIN 8 (OFP8)
AT2G48030	1.53825	0.621286	up	2.31864	1.21328	up	2.30889	1.2072	up	3.09755	1.63113	up	AT2G48030	endonuclease/exonuclease/phosphatase domain-containing protein [Source:EMBL;Acc:AEC10926.1]	AT2G48030 AT2G48030.1 DNAse I-like superfamily protein;(source:Araport11) protein_coding
AT4G24030	1.92806	0.947149	up	2.31514	1.2111	up	-1.10427	-0.143093	down	1.42864	0.514644	up	AT4G24030	uncharacterized protein [Source:EMBL;Acc:AEE84842.1]	AT4G24030 AT4G24030.1 hypothetical protein;(source:Araport11) protein_coding
AT2G01650	1.72218	0.784237	up	2.31439	1.21063	up	1.63933	0.713105	up	1.85266	0.8896	up	PUX2	UBX domain-containing protein 2 [Source:EMBL;Acc:AEC05479.1]	AT2G01650 AT2G01650.1 encodes a peripheral membrane protein that contains UBX domain and interacts with AtCDC48 in vitro and co-fractionates with membrane-associated but not soluble AtCDC48 in vivo. protein_coding PLANT UBX DOMAIN-CONTAINING PROTEIN 2 (PUX2) PLANT UBX DOMAIN-CONTAINING PROTEIN 2 (PUX2)
AT1G76360	1.85272	0.889643	up	2.31086	1.20843	up	1.22877	0.297215	up	1.33685	0.418841	up	AT1G76360	putative protein kinase [Source:EMBL;Acc:AEE35828.1]	AT1G76360 AT1G76360.1 Protein kinase superfamily protein;(source:Araport11) protein_coding
AT5G25450	1.52924	0.612817	up	2.30931	1.20746	up	1.14103	0.190333	up	1.498	0.583034	up	AT5G25450	ubiquinol-cytochrome c reductase subunit 7 [Source:EMBL;Acc:AED93445.1]	AT5G25450 AT5G25450.1 Cytochrome bd ubiquinol oxidase, 14kDa subunit;(source:Araport11) protein_coding
AT5G07380	2.74095	1.45468	up	2.3089	1.20721	up	1.00066	0.000958443	up	-1.12509	-0.170042	down	AT5G07380	uncharacterized protein [Source:EMBL;Acc:AED91149.1]	AT5G07380 AT5G07380.3 hypothetical protein;(source:Araport11) protein_coding
AT5G37480	1.34022	0.42247	up	2.30559	1.20513	up	1.40153	0.487002	up	2.11256	1.07899	up	AT5G37480	uncharacterized protein [Source:EMBL;Acc:AED94196.1]	AT5G37480 AT5G37480.1 maltase-glucoamylase, intestinal protein;(source:Araport11) protein_coding
AT1G48220	5.78892	2.53329	up	2.30413	1.20422	up	1.13482	0.182467	up	-1.31372	-0.393658	down	AT1G48220	protein kinase domain-containing protein [Source:EMBL;Acc:AEE32266.1]	AT1G48220 AT1G48220.1 Protein kinase superfamily protein;(source:Araport11) protein_coding
AT3G49370	1.58414	0.663699	up	2.29996	1.20161	up	1.5701	0.650855	up	1.58444	0.663969	up	AT3G49370	Calcium-dependent protein kinase-like protein [Source:EMBL;Acc:AEE78533.1]	AT3G49370 AT3G49370.1 Calcium-dependent protein kinase (CDPK) family protein;(source:Araport11) protein_coding
AT3G44450	3.13763	1.64967	up	2.29656	1.19948	up	4.13898	2.04928	up	3.98348	1.99403	up	AT3G44450	uncharacterized protein [Source:EMBL;Acc:AEE77904.1]	AT3G44450 AT3G44450.1 hypothetical protein;(source:Araport11) protein_coding BLUE-LIGHT INHIBITOR OF CRYPTOCHROMES 2 (BIC2) BLUE-LIGHT INHIBITOR OF CRYPTOCHROMES 2 (BIC2)
AT3G24500	1.8806	0.911193	up	2.29525	1.19865	up	-1.16225	-0.216926	down	1.05486	0.0770555	up	MBF1C	multiprotein-bridging factor 1c [Source:EMBL;Acc:AEE76906.1]	AT3G24500 AT3G24500.1 One of three genes in A. thaliana encoding multiprotein bridging factor 1, a highly conserved transcriptional coactivator. May serve as a bridging factor between a bZIP factor and TBP. Its expression is specifically elevated in response to pathogen infection, salinity, drought, heat, hydrogen peroxide, and application of abscisic acid or salicylic acid. Constitutive expressi…
AT3G12040	1.83386	0.874885	up	2.2917	1.19642	up	1.27755	0.353383	up	1.35839	0.441893	up	AT3G12040	DNA-3-methyladenine glycosylase [Source:EMBL;Acc:AEE75140.1]	AT3G12040 AT3G12040.1 Encodes a 3-methyladenine-DNA glycosylase. Arabdiopsis cDNA complements the methyl methanesulfonate-sensitive phenotype of an Escherichia coli double mutant deficient in 3-methyladenine glycosylases (DNA-3-methyladenine glycosidases I and II, EC 3.2.2.20 and 3.2.2.21, respectively, encoded by tag and alkA). protein_coding
AT2G24160	3.2467	1.69897	up	2.29019	1.19547	up	2.61579	1.38725	up	2.50002	1.32194	up	AT2G24160	pseudogene.[Source:TAIR;Acc:AT2G24160]	AT2G24160 AT2G24160.1 pseudogene of receptor like protein 37;(source:Araport11) pseudogene
AT5G08380	2.20596	1.14141	up	2.28877	1.19457	up	1.59933	0.677464	up	2.14405	1.10034	up	AtAGAL1	alpha-galactosidase 1 [Source:EMBL;Acc:AED91292.1]	AT5G08380 AT5G08380.1 alpha-galactosidase 1;(source:Araport11) protein_coding ALPHA-GALACTOSIDASE 1 (AGAL1) ALPHA-GALACTOSIDASE 1 (AGAL1);ALPHA-GALACTOSIDASE 1 (AtAGAL1)
AT5G60285	2.50963	1.32748	up	2.28654	1.19317	up	2.04546	1.03243	up	1.39097	0.476087	up	AT5G60285	pre-tRNA.[Source:TAIR;Acc:AT5G60285]	AT5G60285 AT5G60285.1 pre-tRNA tRNA-Leu (anticodon: AAG);(source:Araport11, TAIR10) pre_trna
AT5G41612	1.62186	0.697652	up	2.28579	1.1927	up	-1.0616	-0.0862389	down	-1.20149	-0.264828	down	AT5G41612	other RNA.[Source:TAIR;Acc:AT5G41612]	AT5G41612 AT5G41612.1 Potential natural antisense gene, locus overlaps with AT5G41610 antisense_long_noncoding_rna
AT4G29810	1.83916	0.879044	up	2.2846	1.19194	up	1.91664	0.938583	up	2.00856	1.00616	up	MK1	mitogen-activated protein kinase kinase 2 [Source:EMBL;Acc:AEE85681.1]	AT4G29810 AT4G29810.2 encodes a MAP kinase kinase 2 that regulates MPK6 and MPK4 in response to cold and salt stresses. Co-expression with MEKK1 in protoplasts activated MKK2 activity, suggesting that MEKK1 may be a regulator of MKK2. protein_coding MAP KINASE KINASE 2 (MKK2) MAP KINASE KINASE 2 (ATMKK2);MAP KINASE KINASE 1 (MK1);MAP KINASE KINASE 2 (MKK2)
AT5G38340	2.69534	1.43047	up	2.28135	1.18989	up	2.12802	1.08951	up	1.20362	0.267384	up	AT5G38340	TIR-NBS-LRR class disease resistance protein [Source:EMBL;Acc:AED94299.1]	AT5G38340 AT5G38340.1 Disease resistance protein (TIR-NBS-LRR class) family;(source:Araport11) protein_coding
AT3G11402	2.59275	1.37448	up	2.27782	1.18765	up	2.86193	1.51699	up	1.91501	0.937354	up	AT3G11402	cysteine/histidine-rich C1 domain-containing protein [Source:EMBL;Acc:AEE75038.1]	AT3G11402 AT3G11402.1 Cysteine/Histidine-rich C1 domain family protein;(source:Araport11) protein_coding
AT4G23550	1.387	0.471964	up	2.27638	1.18674	up	-1.2125	-0.277985	down	-1.0219	-0.0312591	down	WRKY29	putative WRKY transcription factor 29 [Source:EMBL;Acc:AEE84774.1]	AT4G23550 AT4G23550.1 Encodes WRKY DNA-binding protein 29 (WRKY29). The mRNA is cell-to-cell mobile. protein_coding (WRKY29) (ATWRKY29); (WRKY29)
AT4G37670	2.24756	1.16836	up	2.2758	1.18637	up	2.33854	1.22561	up	2.00293	1.00211	up	NAGS2	N-acetyl-l-glutamate synthase 2 [Source:EMBL;Acc:AEE86823.1]	AT4G37670 AT4G37670.2 N-acetyl-l-glutamate synthase 2;(source:Araport11) protein_coding N-ACETYL-L-GLUTAMATE SYNTHASE 2 (NAGS2) N-ACETYL-L-GLUTAMATE SYNTHASE 2 (NAGS2)
AT1G03800	1.73359	0.793765	up	2.2741	1.18529	up	1.00124	0.00178814	up	1.52526	0.609055	up	ERF10	ethylene-responsive transcription factor 10 [Source:EMBL;Acc:AEE27615.1]	AT1G03800 AT1G03800.1 encodes a member of the ERF (ethylene response factor) subfamily B-1 of ERF/AP2 transcription factor family (ATERF-10). The protein contains one AP2 domain. There are 15 members in this subfamily including ATERF-3, ATERF-4, ATERF-7, and leafy petiole. protein_coding ERF DOMAIN PROTEIN 10 (ERF10) ARABIDOPSIS THALIANA RF DOMAIN PROTEIN 10 (ATERF10);ERF DOMAIN PROTEIN 10 (ERF10)
AT4G21980	1.607	0.684372	up	2.27123	1.18347	up	-1.00074	-0.00106049	down	1.65374	0.725736	up	ATG8A	autophagy-related protein 8a [Source:EMBL;Acc:AEE84537.1]	AT4G21980 AT4G21980.2 Encodes APG8, a component of autophagy conjugation pathway. Delivered to the lumens of vacuole under nitrogen-starvation condition. Highest expression in flowers. mRNA abundance increased during dark-induced carbon starvation. Predominantly cytoplasmic with or without N starvation. Upon concanamycin A the protein accumulates in the central vacuole as punctuate structures tha…
AT1G23550	2.0679	1.04817	up	2.27076	1.18318	up	-1.42222	-0.508144	down	-1.27967	-0.355773	down	SRO2	RCD one 2-like protein [Source:EMBL;Acc:AEE30402.1]	AT1G23550 AT1G23550.1 Encodes a protein with similarity to RCD1 but without the WWE domain. The protein does have a PARP signature upstream of the C-terminal protein interaction domain. The PARP signature may bind NAD+ and attach the ADP-ribose-moiety from NAD+ to the target molecule. Its presence suggests a role for the protein in ADP ribosylation. Its transcript level is up-regulated by tunicam…
AT3G50260	2.58394	1.36957	up	2.27006	1.18273	up	-1.45949	-0.545465	down	-1.36867	-0.452775	down	CEJ1	ethylene-responsive transcription factor ERF011 [Source:EMBL;Acc:AEE78646.1]	AT3G50260 AT3G50260.1 Encodes a member of the DREB subfamily A-5 of ERF/AP2 transcription factor family. The protein contains one AP2 domain. Involved in defense and freezing stress responses. There are 16 members in this subfamily including RAP2.1, RAP2.9 and RAP2.10. The mRNA is cell-to-cell mobile. protein_coding COOPERATIVELY REGULATED BY ETHYLENE AND JASMONATE 1 (CEJ1) COOPERATIVELY REGULATE…
AT2G32190	2.09893	1.06966	up	2.2663	1.18034	up	-1.1254	-0.170436	down	1.44562	0.531692	up	AT2G32190	uncharacterized protein [Source:EMBL;Acc:AEC08648.1]	AT2G32190 AT2G32190.1 cysteine-rich/transmembrane domain A-like protein;(source:Araport11) protein_coding
AT3G25070	1.38328	0.468091	up	2.26492	1.17946	up	1.16232	0.217005	up	1.82089	0.864646	up	RIN4	RPM1 interacting protein 4 [Source:EMBL;Acc:AEE76974.1]	AT3G25070 AT3G25070.1 Encodes a member of the R protein complex and may represent a virulence target of type III pili effector proteins (virulence factors) from bacterial pathogens, which is 'guarded' by R protein complex (RPM1 and RPS2 proteins). RIN4 physically interacts with RPS2 and RPM1 in vivo. Bacterial avirulence (Avr) effectors AvrB, AvrRpm1, and AvrRpt2 induce a mobility shift in RIN4 a…
AT1G69543	-28.295	-4.82248	down	2.26455	1.17922	up	-17.9416	-4.16524	down	3.81595	1.93204	up	AT1G69543	Pseudogene of AT1G74220.[Source:TAIR;Acc:AT1G69543]	AT1G69543 AT1G69543.1 Pseudogene of AT1G74220 pseudogene
AT1G55910	2.20373	1.13995	up	2.26416	1.17897	up	2.92864	1.55023	up	1.88462	0.914271	up	ZIP11	zinc transporter 11 [Source:EMBL;Acc:AEE33318.1]	AT1G55910 AT1G55910.1 member of Putative zinc transporter ZIP2 - like family protein_coding ZINC TRANSPORTER 11 PRECURSOR (ZIP11) ZINC TRANSPORTER 11 PRECURSOR (ZIP11)
AT3G21810	1.84101	0.880501	up	2.26327	1.17841	up	1.99942	0.999585	up	2.18531	1.12784	up	AT3G21810	zinc finger CCCH domain-containing protein 40 [Source:EMBL;Acc:AEE76554.1]	AT3G21810 AT3G21810.1 Zinc finger C-x8-C-x5-C-x3-H type family protein;(source:Araport11) protein_coding
AT1G77510	1.59488	0.673445	up	2.25942	1.17595	up	1.64973	0.722226	up	1.39911	0.484511	up	PDI6	protein disulfide-isomerase 2 [Source:EMBL;Acc:AEE35987.1]	AT1G77510 AT1G77510.1 Encodes a protein disulfide isomerase-like (PDIL) protein, a member of a multigene family within the thioredoxin (TRX) superfamily. Transcript levels for this gene are up-regulated in response to three different chemical inducers of ER stress (dithiothreitol, beta-mercaptoethanol, and tunicamycin). AtIRE1-2 does not appear to be required for this response, but the atbzip60 m…
AT1G76480	2.24789	1.16857	up	2.25911	1.17576	up	-4.06314	-2.0226	down	-2.02219	-1.01592	down	AT1G76480	uncharacterized protein [Source:EMBL;Acc:AEE35848.1]	AT1G76480 AT1G76480.2 caveolin-1 protein;(source:Araport11) protein_coding
AT2G46150	1.73512	0.795036	up	2.25796	1.17502	up	1.69202	0.758748	up	1.17027	0.226841	up	AT2G46150	late embryogenesis abundant hydroxyproline-rich glycoprotein [Source:EMBL;Acc:AEC10649.1]	AT2G46150 AT2G46150.1 Late embryogenesis abundant (LEA) hydroxyproline-rich glycoprotein family;(source:Araport11) protein_coding
AT5G55930	1.6954	0.761625	up	2.25485	1.17303	up	1.09474	0.130587	up	-1.12816	-0.173972	down	ATOPT1	oligopeptide transporter 1 [Source:EMBL;Acc:AED96700.1]	AT5G55930 AT5G55930.1 oligopeptide transporter protein_coding OLIGOPEPTIDE TRANSPORTER 1 (OPT1) ARABIDOPSIS THALIANA OLIGOPEPTIDE TRANSPORTER 1 (ATOPT1);OLIGOPEPTIDE TRANSPORTER 1 (OPT1)
AT5G19930	1.96052	0.971236	up	2.25304	1.17187	up	2.21377	1.14651	up	2.30833	1.20685	up	AT5G19930	uncharacterized protein [Source:EMBL;Acc:AED92768.1]	AT5G19930 AT5G19930.1 PGR is putative plasma membrane glucose- responsive regulator that is expressed in response to glucose stimulation.RNAi knockdown mutant seeds have enhanced sensitivity to glucose and 2-deoxyglucose. protein_coding PLASMA MEMBRANE GLUCOSE-RESPONSIVE REGULATOR (PGR) PLASMA MEMBRANE GLUCOSE-RESPONSIVE REGULATOR (PGR)
AT2G39518	1.12535	0.170375	up	2.25122	1.1707	up	-1.20884	-0.273624	down	1.11111	0.152002	up	AT2G39518	UPF0497 membrane protein [Source:EMBL;Acc:AEC09689.1]	AT2G39518 AT2G39518.1 Uncharacterized protein family (UPF0497);(source:Araport11) protein_coding CASP-LIKE PROTEIN 4D2 (CASPL4D2) CASP-LIKE PROTEIN 4D2 (CASPL4D2)
AT2G47520	3.84506	1.94301	up	2.25109	1.17063	up	-3.71163	-1.89205	down	-4.09324	-2.03324	down	HRE2	ethylene-responsive transcription factor ERF071 [Source:EMBL;Acc:AEC10854.1]	AT2G47520 AT2G47520.1 encodes a member of the ERF (ethylene response factor) subfamily B-2 of ERF/AP2 transcription factor family. The protein contains one AP2 domain. There are 5 members in this subfamily including RAP2.2 AND RAP2.12. It plays a role in hypoxia-induced root slanting. protein_coding ETHYLENE RESPONSE FACTOR 71 (ERF71) HYPOXIA RESPONSIVE ERF (ETHYLENE RESPONSE FACTOR) 2 (HRE2);ARA…
AT5G24200	1.20347	0.2672	up	2.25018	1.17004	up	1.34967	0.43261	up	1.237	0.30684	up	AT5G24200	alpha/beta-hydrolase domain-containing protein [Source:EMBL;Acc:AED93270.1]	AT5G24200 AT5G24200.1 alpha/beta-Hydrolases superfamily protein;(source:Araport11) protein_coding
AT2G18000	1.76863	0.82263	up	2.25017	1.17003	up	1.67695	0.745837	up	2.17002	1.11771	up	TAF14	TBP-associated factor 14 [Source:EMBL;Acc:AEC06713.1]	AT2G18000 AT2G18000.2 TBP-associated factor 14;(source:Araport11) protein_coding TBP-ASSOCIATED FACTOR 14 (TAF14) TBP-ASSOCIATED FACTOR 14 (TAF14);HOMOLOG OF YEAST YAF9 B (YAF9B)
AT1G72870	1.58031	0.660212	up	2.24707	1.16804	up	-1.09357	-0.129042	down	-1.21403	-0.279806	down	AT1G72870	TIR-NBS class of disease resistance protein [Source:EMBL;Acc:AEE35384.1]	AT1G72870 AT1G72870.1 Disease resistance protein (TIR-NBS class);(source:Araport11) protein_coding
AT1G51790	1.50089	0.585815	up	2.2466	1.16774	up	1.62807	0.703165	up	1.13836	0.186953	up	AT1G51790	leucine-rich repeat protein kinase-like protein [Source:EMBL;Acc:AEE32716.1]	AT1G51790 AT1G51790.1 Leucine-rich repeat protein kinase family protein;(source:Araport11) protein_coding
AT5G11970	1.43563	0.521684	up	2.24311	1.1655	up	1.64792	0.720646	up	2.34558	1.22994	up	AT5G11970	uncharacterized protein [Source:EMBL;Acc:AED91746.1]	AT5G11970 AT5G11970.1 ABC family ABC transporter, putative (DUF3511);(source:Araport11) protein_coding
AT4G19460	2.10928	1.07675	up	2.24253	1.16513	up	1.43298	0.519017	up	1.22761	0.295851	up	AT4G19460	UDP-glycosyltransferase-like protein [Source:EMBL;Acc:AEE84185.1]	AT4G19460 AT4G19460.1 UDP-Glycosyltransferase superfamily protein;(source:Araport11) protein_coding
AT1G43160	2.95113	1.56126	up	2.24146	1.16444	up	-1.10711	-0.146793	down	1.25804	0.331179	up	RAP2.6	ethylene-responsive transcription factor RAP2-6 [Source:EMBL;Acc:AEE31950.1]	AT1G43160 AT1G43160.1 encodes a member of the ERF (ethylene response factor) subfamily B-4 of ERF/AP2 transcription factor family (RAP2.6). The protein contains one AP2 domain. There are 7 members in this subfamily. protein_coding RELATED TO AP2 6 (RAP2.6) RELATED TO AP2 6 (RAP2.6)
AT2G02810	1.6129	0.689659	up	2.23958	1.16323	up	1.61539	0.691878	up	1.76841	0.822454	up	ATUTR1	UDP-galactose transporter 1 [Source:EMBL;Acc:AEC05628.1]	AT2G02810 AT2G02810.1 Encodes a multitransmembrane hydrophobic protein that functions as transporter of UDP-galactose and UDP-glucose into the Golgi. Localized in the ER. Involved in the unfolded protein response, a mechanism that controls proper protein folding in the ER. protein_coding UDP-GALACTOSE TRANSPORTER 1 (UTR1) UDP-GALACTOSE TRANSPORTER 1 (UTR1);UDP-GALACTOSE TRANSPORTER 1 (ATUTR1)
AT1G03210	1.97173	0.979461	up	2.23634	1.16114	up	2.20139	1.13842	up	2.67013	1.41691	up	AT1G03210	Phenazine biosynthesis PhzC/PhzF protein [Source:EMBL;Acc:AEE27545.1]	AT1G03210 AT1G03210.1 Phenazine biosynthesis PhzC/PhzF protein;(source:Araport11) protein_coding
AT3G63380	1.49886	0.583868	up	2.23534	1.16049	up	-1.31906	-0.399514	down	-2.34883	-1.23194	down	AT3G63380	Ca2+-transporting ATPase [Source:EMBL;Acc:AEE80473.1]	AT3G63380 AT3G63380.1 ATPase E1-E2 type family protein / haloacid dehalogenase-like hydrolase family protein;(source:Araport11) protein_coding AUTO-INHIBITED CA2+ ATPASE 12 (ACA12) AUTO-INHIBITED CA2+ ATPASE 12 (ACA12)
AT3G20600	2.9362	1.55395	up	2.2311	1.15776	up	3.21536	1.68498	up	2.61813	1.38853	up	NDR1	late embryogenesis abundant hydroxyproline-rich glycoprotein [Source:EMBL;Acc:AEE76402.1]	AT3G20600 AT3G20600.1 Required for non-race specific resistance to bacterial and fungal pathogens.Mediates systemic acquired resistance (SAR) response. The mRNA is cell-to-cell mobile. protein_coding NON RACE-SPECIFIC DISEASE RESISTANCE 1 (NDR1) NON RACE-SPECIFIC DISEASE RESISTANCE 1 (NDR1)
AT3G47820	1.92047	0.941461	up	2.22915	1.15649	up	1.42941	0.515424	up	1.21265	0.27816	up	PUB39	U-box domain-containing protein 39 [Source:EMBL;Acc:AEE78334.1]	AT3G47820 AT3G47820.1 PLANT U-BOX 39;(source:Araport11) protein_coding PLANT U-BOX 39 (PUB39) PLANT U-BOX 39 (PUB39)
AT4G12100	1.33689	0.418885	up	2.22862	1.15615	up	1.33689	0.418885	up	2.22862	1.15615	up	AT4G12100	cullin-like protein 5 [Source:EMBL;Acc:AEE83096.1]	AT4G12100 AT4G12100.1 Cullin family protein;(source:Araport11) protein_coding
AT1G48210	1.94087	0.956704	up	2.22229	1.15205	up	1.96294	0.973014	up	2.03431	1.02454	up	AT1G48210	serine/threonine protein kinase [Source:EMBL;Acc:AEE32265.1]	AT1G48210 AT1G48210.1 Protein kinase superfamily protein;(source:Araport11) protein_coding
AT2G41730	1.8499	0.887445	up	2.22208	1.15191	up	-2.16409	-1.11376	down	-3.48576	-1.80147	down	AT2G41730	uncharacterized protein [Source:EMBL;Acc:AEC10026.1]	AT2G41730 AT2G41730.1 Expression in rosette leaves is activated by high concentration of boron. protein_coding
AT2G15042	6.18128	2.62791	up	2.22	1.15056	up	1.88259	0.912721	up	3.81754	1.93264	up	AT2G15042	Leucine-rich repeat (LRR) family protein [Source:EMBL;Acc:AEC06363.1]	AT2G15042 AT2G15042.1 Leucine-rich repeat (LRR) family protein;(source:Araport11) protein_coding
AT3G02240	-1.14434	-0.19452	down	2.21957	1.15028	up	-1.98294	-0.987644	down	-1.19289	-0.254467	down	RGF7	uncharacterized protein [Source:EMBL;Acc:AEE73782.1]	AT3G02240 AT3G02240.1 Encodes a root meristem growth factor (RGF). Belongs to a family of functionally redundant homologous peptides that are secreted, tyrosine-sulfated, and expressed mainly in the stem cell area and the innermost layer of central columella cells. RGFs are required for maintenance of the root stem cell niche and transit amplifying cell proliferation. Members of this family inclu…
AT4G03505	3.27471	1.71137	up	2.2189	1.14985	up	-2.32185	-1.21528	down	-3.42664	-1.77679	down	AT4G03505	uncharacterized protein [Source:EMBL;Acc:AEE82330.1]	AT4G03505 AT4G03505.1 hypothetical protein;(source:Araport11) protein_coding
AT5G49690	2.01232	1.00886	up	2.2145	1.14698	up	-1.10577	-0.145049	down	1.41722	0.503061	up	AT5G49690	UDP-glycosyltransferase-like protein [Source:EMBL;Acc:AED95845.1]	AT5G49690 AT5G49690.1 UDP-Glycosyltransferase superfamily protein;(source:Araport11) protein_coding
AT5G37070	1.49238	0.577614	up	2.21236	1.14558	up	1.26409	0.338097	up	2.29194	1.19657	up	AT5G37070	uncharacterized protein [Source:EMBL;Acc:AED94144.1]	AT5G37070 AT5G37070.1 hypothetical protein (Protein of unknown function, DUF538);(source:Araport11) protein_coding
AT1G54575	1.39045	0.475549	up	2.21047	1.14435	up	-1.11185	-0.152957	down	1.46383	0.549748	up	AT1G54575	uncharacterized protein [Source:EMBL;Acc:AEE33120.1]	AT1G54575 AT1G54575.1 hypothetical protein;(source:Araport11) protein_coding
AT2G31865	1.55129	0.633472	up	2.20873	1.14322	up	1.78067	0.832421	up	1.9113	0.934556	up	PARG2	putative poly(ADP-ribose) glycohydrolase 2 [Source:EMBL;Acc:AEC08596.1]	AT2G31865 AT2G31865.2 poly(ADP-ribose) glycohydrolase 2;(source:Araport11) protein_coding POLY(ADP-RIBOSE) GLYCOHYDROLASE 2 (PARG2) (ATPARG2);POLY(ADP-RIBOSE) GLYCOHYDROLASE 2 (PARG2)
AT5G09800	1.44082	0.526894	up	2.20856	1.14311	up	1.23844	0.308527	up	1.01812	0.0259075	up	AT5G09800	U-box domain-containing protein 28 [Source:EMBL;Acc:AED91448.1]	AT5G09800 AT5G09800.1 ARM repeat superfamily protein;(source:Araport11) protein_coding
AT2G26170	2.25758	1.17478	up	2.20704	1.14211	up	1.69915	0.764815	up	1.40363	0.489162	up	CYP711A1	cytochrome P450, family 711, subfamily A, polypeptide 1 [Source:EMBL;Acc:AEC07804.1]	AT2G26170 AT2G26170.1 Encodes a protein with similarity to thromboxane-A synthase, member of the CYP711A cytochrome P450 family. MAX1 is a specific repressor of vegetative axillary buds generated by the axillary meristem. Expressed in vascular traces in the rosette stem and axillary buds throughout plant development. Mutants have increased axillary branches. Along with MAX3,4 thought to mediate c…
AT1G70690	2.60995	1.38402	up	2.20399	1.14011	up	2.44074	1.28732	up	2.41487	1.27195	up	HWI1	cysteine-rich repeat secretory protein 2 [Source:EMBL;Acc:AEE35100.1]	AT1G70690 AT1G70690.1 Encodes a plasmodesmal protein that may be involved in the intercellular movement of molecules through the plasmodesmata. The protein has two DUF26 domains and a single transmembrane domain. protein_coding HOPW1-1-INDUCED GENE1 (HWI1) PLASMODESMATA-LOCATED PROTEIN 5 (PDLP5);HOPW1-1-INDUCED GENE1 (HWI1)
AT1G71910	1.98768	0.991083	up	2.19964	1.13727	up	1.47096	0.556761	up	1.87968	0.910489	up	AT1G71910	uncharacterized protein [Source:EMBL;Acc:AEE35250.1]	AT1G71910 AT1G71910.1 hypothetical protein;(source:Araport11) protein_coding
AT3G46690	1.44688	0.532942	up	2.19814	1.13628	up	-1.06321	-0.0884318	down	1.16438	0.219556	up	AT3G46690	UDP-glycosyltransferase-like protein [Source:EMBL;Acc:AEE78194.1]	AT3G46690 AT3G46690.1 UDP-Glycosyltransferase superfamily protein;(source:Araport11) protein_coding
AT2G02230	1.46792	0.553778	up	2.19744	1.13583	up	-1.02995	-0.0425692	down	1.47461	0.560335	up	AtPP2-B1	F-box protein PP2-B1 [Source:EMBL;Acc:AEC05559.1]	AT2G02230 AT2G02230.1 phloem protein 2-B1;(source:Araport11) protein_coding PHLOEM PROTEIN 2-B1 (PP2-B1) PHLOEM PROTEIN 2-B1 (PP2-B1);PHLOEM PROTEIN 2-B1 (AtPP2-B1)
AT4G11000	1.72142	0.783599	up	2.19702	1.13555	up	2.70447	1.43534	up	2.74485	1.45673	up	AT4G11000	ankyrin repeat-containing protein [Source:EMBL;Acc:AEE82960.1]	AT4G11000 AT4G11000.1 Ankyrin repeat family protein;(source:Araport11) protein_coding
AT5G58840	6.45958	2.69144	up	2.19654	1.13523	up	-3.44535	-1.78465	down	-5.35492	-2.42086	down	AT5G58840	Subtilase family protein [Source:EMBL;Acc:AED97109.1]	AT5G58840 AT5G58840.1 Subtilase family protein;(source:Araport11) protein_coding
AT3G09520	1.70736	0.771764	up	2.19571	1.13469	up	1.94259	0.957981	up	1.07824	0.108677	up	EXO70H4	exocyst complex component 7 [Source:EMBL;Acc:AEE74776.1]	AT3G09520 AT3G09520.1 A member of EXO70 gene family, putative exocyst subunits, conserved in land plants. Arabidopsis thaliana contains 23 putative EXO70 genes, which can be classified into eight clusters on the phylogenetic tree. protein_coding EXOCYST SUBUNIT EXO70 FAMILY PROTEIN H4 (EXO70H4) EXOCYST SUBUNIT EXO70 FAMILY PROTEIN H4 (EXO70H4);EXOCYST SUBUNIT EXO70 FAMILY PROTEIN H4 (ATEXO70H4)
AT5G62150	1.825	0.867895	up	2.1895	1.1306	up	-1.21179	-0.277141	down	1.22895	0.297429	up	AT5G62150	peptidoglycan-binding LysM domain-containing protein [Source:EMBL;Acc:AED97570.1]	AT5G62150 AT5G62150.1 peptidoglycan-binding LysM domain-containing protein;(source:Araport11) protein_coding
AT5G10695	2.76945	1.4696	up	2.18852	1.12996	up	1.0318	0.0451679	up	1.68268	0.75076	up	AT5G10695	uncharacterized protein [Source:EMBL;Acc:AED91583.1]	AT5G10695 AT5G10695.1 methionyl-tRNA synthetase;(source:Araport11) protein_coding
AT5G43380	1.77163	0.82508	up	2.18728	1.12914	up	1.01921	0.0274444	up	1.17456	0.232118	up	TOPP6	serine/threonine-protein phosphatase PP1 isozyme 7 [Source:EMBL;Acc:AED94953.1]	AT5G43380 AT5G43380.1 encodes a type I serine/threonine protein phosphatase expressed in expressed in roots, rosettes and flowers. protein_coding TYPE ONE SERINE/THREONINE PROTEIN PHOSPHATASE 6 (TOPP6) TYPE ONE SERINE/THREONINE PROTEIN PHOSPHATASE 6 (TOPP6)
AT3G04210	5.87508	2.55461	up	2.18546	1.12794	up	5.86542	2.55224	up	4.12327	2.04379	up	AT3G04210	TIR-NBS class disease resistance protein [Source:EMBL;Acc:AEE74053.1]	AT3G04210 AT3G04210.1 Disease resistance protein (TIR-NBS class);(source:Araport11) protein_coding (TN13) (TN13)
AT1G70440	3.22623	1.68985	up	2.18344	1.1266	up	-4.96833	-2.31276	down	-2.78946	-1.47999	down	SRO3	SRO3-like protein [Source:EMBL;Acc:AEE35062.1]	AT1G70440 AT1G70440.1 Encodes a protein with similarity to RCD1 but without the WWE domain. The protein does have a PARP signature upstream of the C-terminal protein interaction domain. The PARP signature may bind NAD+ and attach the ADP-ribose-moiety from NAD+ to the target molecule. Its presence suggests a role for the protein in ADP ribosylation. protein_coding SIMILAR TO RCD ONE 3 (SRO3) SIMI…
AT3G11330	1.79213	0.841679	up	2.18161	1.12539	up	1.01238	0.0177541	up	-1.07335	-0.102127	down	PIRL9	ras group-related LRR 9 protein [Source:EMBL;Acc:AEE75031.1]	AT3G11330 AT3G11330.1 Encodes PIRL9, a member of the Plant Intracellular Ras-group-related LRRs (Leucine rich repeat proteins). PIRLs are a distinct, plant-specific class of intracellular LRRs that likely mediate protein interactions, possibly in the context of signal transduction. PIRL1 (AT5G05850) and PIRL9 (AT3G11330) are genetically redundant and are required for differentiation of microspore…
AT4G24970	2.21642	1.14823	up	2.1803	1.12453	up	2.61236	1.38535	up	2.45023	1.29292	up	AT4G24970	histidine kinase-like ATPase domain-containing protein [Source:EMBL;Acc:AEE84983.1]	AT4G24970 AT4G24970.1 MORC7 is a member of a family of GHKL ATPases. It is localized in the nuceloplasm and adjacent to chromocenters. Along with MORC4, it appears to repress the expression of genes involved in defense against pathogens. protein_coding (ATMORC7) (ATMORC7)
AT1G60730	1.76575	0.820281	up	2.17945	1.12396	up	-2.01473	-1.01059	down	-1.6261	-0.701414	down	AT1G60730	NAD(P)-linked oxidoreductase-like protein [Source:EMBL;Acc:AEE33725.1]	AT1G60730 AT1G60730.3 NAD(P)-linked oxidoreductase superfamily protein;(source:Araport11) protein_coding
AT1G28190	1.8719	0.904503	up	2.17872	1.12348	up	-1.18106	-0.240082	down	1.0091	0.0130634	up	AT1G28190	uncharacterized protein [Source:EMBL;Acc:AEE30929.1]	AT1G28190 AT1G28190.1 hypothetical protein;(source:Araport11) protein_coding
AT1G78050	1.51482	0.599144	up	2.1786	1.1234	up	-1.77347	-0.826571	down	-1.06767	-0.09446	down	PGM	phosphoglycerate/bisphosphoglycerate mutase [Source:EMBL;Acc:AEE36062.1]	AT1G78050 AT1G78050.1 phosphoglycerate/bisphosphoglycerate mutase;(source:Araport11) protein_coding PHOSPHOGLYCERATE/BISPHOSPHOGLYCERATE MUTASE (PGM) PHOSPHOGLYCERATE/BISPHOSPHOGLYCERATE MUTASE (PGM)
AT1G69410	1.42293	0.508866	up	2.1777	1.12281	up	-1.47165	-0.557431	down	1.1809	0.239885	up	ATELF5A-3	translation initiation factor eIF-5A [Source:EMBL;Acc:AEE34921.1]	AT1G69410 AT1G69410.1 Encodes eIF5A-2, a putative eukaryotic translation initiation factor. There are three eIF5A coding genes in Arabidopsis: eIF5A-1/At1g13950, eIF5A-2/At1g26630 and eIF5A-3/At1g69410. protein_coding EUKARYOTIC ELONGATION FACTOR 5A-3 (ELF5A-3) EUKARYOTIC ELONGATION FACTOR 5A-3 (ELF5A-3);EUKARYOTIC ELONGATION FACTOR 5A-3 (ATELF5A-3)
AT5G21900	2.03426	1.0245	up	2.17543	1.1213	up	1.87132	0.904054	up	1.95868	0.969882	up	AT5G21900	RNI-like family protein-like protein [Source:EMBL;Acc:AED92952.1]	AT5G21900 AT5G21900.1 RNI-like superfamily protein;(source:Araport11) protein_coding
AT4G02520	1.59362	0.672305	up	2.17536	1.12125	up	1.63483	0.709136	up	1.80657	0.85325	up	ATPM24.1	glutathione S-transferase PM24 [Source:EMBL;Acc:AEE82183.1]	AT4G02520 AT4G02520.1 Encodes glutathione transferase belonging to the phi class of GSTs. Naming convention according to Wagner et al. (2002). The expression of this gene is upregulated by herbicide safeners such as benoxacor and fenclorim. protein_coding GLUTATHIONE S-TRANSFERASE PHI 2 (GSTF2) GLUTATHIONE S-TRANSFERASE PHI 2 (ATGSTF2); (ATPM24.1);GLUTATHIONE S-TRANSFERASE PHI 2 (GSTF2); (GST2); …
AT1G49050	1.98605	0.9899	up	2.17217	1.11913	up	1.69883	0.764539	up	1.69718	0.763143	up	AT1G49050	aspartyl protease [Source:EMBL;Acc:AEE32389.1]	AT1G49050 AT1G49050.1 Encodes a member of the aspartyl protease family. Interacts with BAGP1 and BAG6 and appears to be required for cleavage of BAG6 as BAG6 is not cleaved in APCB1 mutant backgrounds. protein_coding (APCB1) (APCB1)
AT4G01895	1.67439	0.743631	up	2.16996	1.11767	up	-1.12187	-0.165905	down	2.25838	1.17529	up	AT4G01895	systemic acquired resistance (SAR) regulator protein NIMIN-1-like protein [Source:EMBL;Acc:AEE82092.1]	AT4G01895 AT4G01895.1 systemic acquired resistance (SAR) regulator protein NIMIN-1-like protein;(source:Araport11) protein_coding
AT5G52800	1.76249	0.817619	up	2.16953	1.11738	up	2.8687	1.5204	up	2.50018	1.32203	up	AT5G52800	DNA primase [Source:EMBL;Acc:AED96262.1]	AT5G52800 AT5G52800.3 DNA primase;(source:Araport11) protein_coding
AT1G08450	1.925	0.944858	up	2.16848	1.11669	up	2.68235	1.4235	up	2.44703	1.29103	up	AtCRT3	calreticulin-3 [Source:EMBL;Acc:AEE28291.1]	AT1G08450 AT1G08450.1 Encodes one of three Arabidopsis calreticulins. In CRT-deficient mouse fibroblasts, this protein restores ER Ca2+ levels. Non-receptor component required for EFR-mediated immunity. Mutants show de-repressed anthocyanin accumulation in the presence of elf18, and EFR accumulation and signalling. protein_coding CALRETICULIN 3 (CRT3) PRIORITY IN SWEET LIFE 1 (PSL1);EMS-MUTAGENIZ…
AT4G37010	2.64113	1.40115	up	2.1678	1.11623	up	-1.78203	-0.833518	down	-1.6228	-0.698483	down	CEN2	calcium-binding protein CML19 [Source:EMBL;Acc:AEE86734.1]	AT4G37010 AT4G37010.2 Encodes a member of the Centrin family. Mutants are hypersensitive to UV and prone to UV induced DNA damage. Based on sequence similarity and mutant phenotype CEN2 is thought to be involved in nucelotide excision repair/DNA repair. protein_coding CENTRIN 2 (CEN2) CENTRIN 2 (CEN2)
AT2G24390	1.52002	0.604092	up	2.16059	1.11142	up	1.74035	0.799381	up	2.88899	1.53056	up	AT2G24390	AIG2-like family protein [Source:EMBL;Acc:AEC07569.1]	AT2G24390 AT2G24390.1 AIG2-like (avirulence induced gene) family protein;(source:Araport11) protein_coding
AT3G45720	8.45526	3.07985	up	2.15813	1.10978	up	8.45526	3.07985	up	2.15813	1.10978	up	AT3G45720	major facilitator protein [Source:EMBL;Acc:AEE78063.1]	AT3G45720 AT3G45720.1 Encodes a member of the NAXT NPF subfamily. protein_coding
AT2G40600	2.03468	1.0248	up	2.15735	1.10926	up	2.0717	1.05081	up	2.49619	1.31973	up	AT2G40600	appr-1-p processing enzyme family protein [Source:EMBL;Acc:AEC09853.1]	AT2G40600 AT2G40600.1 appr-1-p processing enzyme family protein;(source:Araport11) protein_coding
AT1G02530	2.06905	1.04897	up	2.15554	1.10805	up	-1.70312	-0.768177	down	-2.4132	-1.27095	down	PGP12	P-glycoprotein 12 [Source:EMBL;Acc:AEE27441.1]	AT1G02530 AT1G02530.1 P-glycoprotein 12;(source:Araport11) protein_coding ATP-BINDING CASSETTE B12 (ABCB12) ATP-BINDING CASSETTE B12 (ABCB12);P-GLYCOPROTEIN 12 (PGP12)
AT1G22400	1.38581	0.470735	up	2.15381	1.10689	up	-1.05334	-0.0749664	down	-1.20014	-0.263201	down	ATUGT85A1	cytokinin-O-glucosyltransferase 2 [Source:EMBL;Acc:AEE30237.1]	AT1G22400 AT1G22400.1 UDP-Glycosyltransferase superfamily protein;(source:Araport11) protein_coding (UGT85A1) (UGT85A1);ARABIDOPSIS THALIANA UDP-GLUCOSYL TRANSFERASE 85A1 (ATUGT85A1)
AT5G48410	1.78539	0.836237	up	2.15274	1.10617	up	-1.40123	-0.48669	down	-1.70366	-0.768637	down	ATGLR1.3	glutamate receptor 1.3 [Source:EMBL;Acc:AED95667.1]	AT5G48410 AT5G48410.1 member of Putative ligand-gated ion channel subunit family protein_coding GLUTAMATE RECEPTOR 1.3 (GLR1.3) GLUTAMATE RECEPTOR 1.3 (GLR1.3);ARABIDOPSIS THALIANA GLUTAMATE RECEPTOR 1.3 (ATGLR1.3)
AT1G72910	3.25226	1.70144	up	2.15098	1.10499	up	2.47625	1.30816	up	2.66523	1.41426	up	AT1G72910	Toll-Interleukin-Resistance domain-containing protein [Source:EMBL;Acc:AEE35390.1]	AT1G72910 AT1G72910.1 Toll-Interleukin-Resistance (TIR) domain-containing protein;(source:Araport11) protein_coding
AT4G15270	1.42695	0.512934	up	2.14906	1.10371	up	1.25335	0.325792	up	1.48875	0.574102	up	AT4G15270	glucosyltransferase-related protein [Source:EMBL;Acc:AEE83579.1]	AT4G15270 AT4G15270.1 glucosyltransferase-like protein;(source:Araport11) protein_coding
AT2G20720	1.45523	0.541249	up	2.1479	1.10293	up	-1.93	-0.9486	down	-1.97176	-0.979484	down	AT2G20720	pentatricopeptide repeat-containing protein [Source:EMBL;Acc:AEC07061.1]	AT2G20720 AT2G20720.1 Pentatricopeptide repeat (PPR) superfamily protein;(source:Araport11) protein_coding
AT2G22860	2.09052	1.06386	up	2.14763	1.10274	up	-1.30179	-0.380496	down	1.01677	0.0239887	up	ATPSK2	phytosulfokine-beta [Source:EMBL;Acc:AEC07366.1]	AT2G22860 AT2G22860.1 Phytosulfokine 2 precursor, coding for a unique plant peptide growth factor. The mRNA is cell-to-cell mobile. protein_coding PHYTOSULFOKINE 2 PRECURSOR (PSK2) PHYTOSULFOKINE 2 PRECURSOR (ATPSK2);PHYTOSULFOKINE 2 PRECURSOR (PSK2)
AT5G61190	1.99697	0.997811	up	2.14674	1.10215	up	2.41661	1.27298	up	2.11932	1.0836	up	AT5G61190	putative endonuclease or glycosyl hydrolase with C2H2-type zinc finger domain [Source:EMBL;Acc:AED97432.1]	AT5G61190 AT5G61190.1 putative endonuclease or glycosyl hydrolase with C2H2-type zinc finger domain-containing protein;(source:Araport11) protein_coding
AT1G74360	1.70809	0.772384	up	2.14636	1.10189	up	-1.04153	-0.0587101	down	-1.69148	-0.758284	down	AT1G74360	putative LRR receptor-like serine/threonine-protein kinase [Source:EMBL;Acc:AEE35582.1]	AT1G74360 AT1G74360.1 NILR1 encodes a serine/threonine kinase involved in defense response to nematodes.. protein_coding NEMATODE-INDUCED LRR-RLK 1 (NILR1) NEMATODE-INDUCED LRR-RLK 1 (NILR1)
AT4G05020	1.8134	0.8587	up	2.1424	1.09923	up	-1.48472	-0.570188	down	-2.02787	-1.01997	down	NDB2	NAD(P)H dehydrogenase B2 [Source:EMBL;Acc:AEE82460.1]	AT4G05020 AT4G05020.2 NAD(P)H dehydrogenase B2;(source:Araport11) protein_coding NAD(P)H DEHYDROGENASE B2 (NDB2) NAD(P)H DEHYDROGENASE B2 (NDB2)
AT3G01290	1.35665	0.440049	up	2.14185	1.09886	up	1.24123	0.311771	up	1.71399	0.777359	up	AT3G01290	Hypersensitive-induced response protein 3 [Source:EMBL;Acc:AEE73633.1]	AT3G01290 AT3G01290.1 SPFH/Band 7/PHB domain-containing membrane-associated protein family;(source:Araport11) protein_coding HYPERSENSITIVE INDUCED REACTION 2 (HIR2) (AtHIR2);HYPERSENSITIVE INDUCED REACTION 2 (HIR2)
AT5G43170	1.20423	0.26811	up	2.14182	1.09884	up	1.04663	0.0657573	up	1.08331	0.115445	up	AZF3	zinc-finger protein 3 [Source:EMBL;Acc:AED94918.1]	AT5G43170 AT5G43170.1 Encodes zinc finger protein. mRNA levels are elevated in response to high salinity and low temperature. The protein is localized to the nucleus and acts as a transcriptional repressor. protein_coding ZINC-FINGER PROTEIN 3 (ZF3) ZINC-FINGER PROTEIN 3 (ZF3);ZINC-FINGER PROTEIN 3 (AZF3)
AT2G23680	1.46034	0.546302	up	2.13704	1.09561	up	1.503	0.587841	up	1.58503	0.664509	up	AT2G23680	cold acclimation protein WCOR413-like protein [Source:EMBL;Acc:AEC07480.1]	AT2G23680 AT2G23680.1 Cold acclimation protein WCOR413 family;(source:Araport11) protein_coding
AT3G17700	2.13388	1.09348	up	2.13632	1.09513	up	2.07279	1.05157	up	1.60124	0.679193	up	CNGC20	cyclic nucleotide gated channel [Source:EMBL;Acc:AEE75994.1]	AT3G17700 AT3G17700.1 cyclic nucleotide-binding transporter 1, member of a family of cyclic nucleotide gated channels. The mRNA is cell-to-cell mobile. protein_coding CYCLIC NUCLEOTIDE-BINDING TRANSPORTER 1 (CNBT1) CYCLIC NUCLEOTIDE-BINDING TRANSPORTER 1 (CNBT1);CYCLIC NUCLEOTIDE-GATED CHANNEL 20 (ATCNGC20);CYCLIC NUCLEOTIDE GATED CHANNEL 20 (CNGC20)
AT2G30250	1.59477	0.673346	up	2.13519	1.09436	up	-1.01456	-0.020853	down	1.29877	0.377141	up	WRKY25	putative WRKY transcription factor 25 [Source:EMBL;Acc:AEC08362.1]	AT2G30250 AT2G30250.1 member of WRKY Transcription Factor; Group I. Located in nucleus. Involved in response to various abiotic stresses - especially salt stress. protein_coding WRKY DNA-BINDING PROTEIN 25 (WRKY25) (AtWRKY25);WRKY DNA-BINDING PROTEIN 25 (WRKY25)
AT4G37530	1.35615	0.439512	up	2.13417	1.09367	up	1.56811	0.64903	up	1.7307	0.791356	up	AT4G37530	peroxidase 51 [Source:EMBL;Acc:AEE86807.1]	AT4G37530 AT4G37530.1 Peroxidase superfamily protein;(source:Araport11) protein_coding
AT5G64990	1.30055	0.379127	up	2.13367	1.09333	up	-1.03195	-0.0453682	down	1.02323	0.0331302	up	RABH1a	RAB GTPase homolog H1A [Source:EMBL;Acc:AED97980.1]	AT5G64990 AT5G64990.2 RAB GTPase homolog H1A;(source:Araport11) protein_coding RAB GTPASE HOMOLOG H1A (RABH1a) RAB GTPASE HOMOLOG H1A (RABH1a)
AT3G61113	1.98894	0.992001	up	2.13175	1.09204	up	1.06236	0.0872765	up	1.76628	0.820716	up	AT3G61113	ubiquitin-related modifier 1-2 [Source:EMBL;Acc:AEE80156.1]	AT3G61113 AT3G61113.1 Ubiquitin related modifier 1;(source:Araport11) protein_coding UBIQUITIN-RELATED MODIFIER 12 (URM12) UBIQUITIN-RELATED MODIFIER 12 (URM12)
AT3G50650	1.85384	0.890519	up	2.12947	1.0905	up	1.30256	0.381349	up	1.16967	0.226101	up	AT3G50650	scarecrow-like protein 7 [Source:EMBL;Acc:AEE78689.1]	AT3G50650 AT3G50650.1 GRAS family transcription factor;(source:Araport11) protein_coding
AT5G37600	1.14545	0.195915	up	2.12725	1.08899	up	1.18893	0.249661	up	1.1439	0.193955	up	GLN1;1	glutamine synthetase cytosolic isozyme 1-1 [Source:EMBL;Acc:AED94209.1]	AT5G37600 AT5G37600.1 encodes a cytosolic glutamine synthetase, the enzyme has high affinity with substrate ammonium protein_coding GLUTAMINE SYNTHASE CLONE R1 (GSR 1) ARABIDOPSIS THALIANA GLUTAMINE SYNTHASE CLONE R1 (ATGSR1);GLUTAMINE SYNTHASE 1;1 (GLN1;1);ARABIDOPSIS GLUTAMINE SYNTHASE 1;1 (ATGLN1;1);GLUTAMINE SYNTHASE CLONE R1 (GSR 1)
AT3G54270	1.83343	0.874543	up	2.12622	1.08829	up	2.35718	1.23706	up	2.59454	1.37548	up	AT3G54270	putative sucrose-phosphatase 3a [Source:EMBL;Acc:AEE79206.1]	AT3G54270 AT3G54270.1 sucrose-6F-phosphate phosphohydrolase family protein;(source:Araport11) protein_coding
AT3G03560	1.93604	0.953105	up	2.12576	1.08798	up	1.95184	0.964835	up	1.68724	0.754661	up	AT3G03560	uncharacterized protein [Source:EMBL;Acc:AEE73957.1]	AT3G03560 AT3G03560.1 hypothetical protein;(source:Araport11) protein_coding
AT1G59860	2.32018	1.21423	up	2.12564	1.0879	up	1.11083	0.15164	up	-1.03832	-0.0542529	down	AT1G59860	HSP20-like chaperone [Source:EMBL;Acc:AEE33629.1]	AT1G59860 AT1G59860.1 HSP20-like chaperones superfamily protein;(source:Araport11) protein_coding
AT3G16565	1.90469	0.929558	up	2.12476	1.0873	up	1.48797	0.573342	up	1.64402	0.717232	up	AT3G16565	putative nucleotide binding protein [Source:EMBL;Acc:AEE75838.1]	AT3G16565 AT3G16565.2 threonyl and alanyl tRNA synthetase second additional domain-containing protein;(source:Araport11) protein_coding
AT5G64370	1.5675	0.648466	up	2.12467	1.08724	up	1.25175	0.323941	up	1.57521	0.655542	up	BETA-UP	beta-ureidopropionase [Source:EMBL;Acc:AED97881.1]	AT5G64370 AT5G64370.1 PYD3 encodes a beta-ureidopropionase which, when expressed in E. coli, has been shown to convert beta-ureidopropionate into beta-alanine. It localizes to the cytosol and plays an important role in uracil degradation. protein_coding BETA-UREIDOPROPIONASE (BETA-UP) PYRIMIDINE 3 (PYD3);BETA-UREIDOPROPIONASE (BETA-UP)
AT5G54140	1.33689	0.418884	up	2.11322	1.07944	up	1.40889	0.494561	up	1.56694	0.647946	up	ILL3	IAA-amino acid hydrolase ILR1-like 3 [Source:EMBL;Acc:AED96456.1]	AT5G54140 AT5G54140.1 encodes a protein similar to IAA amino acid conjugate hydrolase protein_coding IAA-LEUCINE-RESISTANT (ILR1)-LIKE 3 (ILL3) IAA-LEUCINE-RESISTANT (ILR1)-LIKE 3 (ILL3)
AT1G76980	1.70396	0.768888	up	2.11054	1.07761	up	-1.1242	-0.168895	down	-1.05877	-0.0823836	down	AT1G76980	uncharacterized protein [Source:EMBL;Acc:AEE35915.1]	AT1G76980 AT1G76980.1 patatin-like phospholipase domain protein;(source:Araport11) protein_coding
AT3G26440	1.55533	0.637222	up	2.1098	1.0771	up	-1.21571	-0.281795	down	-1.11962	-0.163014	down	AT3G26440	uncharacterized protein [Source:EMBL;Acc:AEE77159.1]	AT3G26440 AT3G26440.1 transmembrane protein, putative (DUF707);(source:Araport11) protein_coding
AT5G53550	1.70896	0.773118	up	2.10971	1.07705	up	1.66545	0.735909	up	1.69618	0.76229	up	ATYSL3	metal-nicotianamine transporter YSL3 [Source:EMBL;Acc:AED96376.1]	AT5G53550 AT5G53550.1 YELLOW STRIPE like 3;(source:Araport11) protein_coding YELLOW STRIPE LIKE 3 (YSL3) YELLOW STRIPE LIKE 3 (ATYSL3);YELLOW STRIPE LIKE 3 (YSL3)
AT3G26210	1.53764	0.620721	up	2.10955	1.07694	up	1.41875	0.504617	up	1.20806	0.272689	up	CYP71B23	cytochrome P450 71B23 [Source:EMBL;Acc:AEE77134.1]	AT3G26210 AT3G26210.1 putative cytochrome P450 The mRNA is cell-to-cell mobile. protein_coding "CYTOCHROME P450, FAMILY 71, SUBFAMILY B, POLYPEPTIDE 23" (CYP71B23) "CYTOCHROME P450, FAMILY 71, SUBFAMILY B, POLYPEPTIDE 23" (CYP71B23)
AT5G39000	2.17437	1.1206	up	2.10902	1.07657	up	2.90402	1.53805	up	2.58163	1.36828	up	AT5G39000	putative receptor-like protein kinase [Source:EMBL;Acc:AED94385.1]	AT5G39000 AT5G39000.1 Malectin/receptor-like protein kinase family protein;(source:Araport11) protein_coding
AT1G67800	1.76632	0.820745	up	2.10735	1.07543	up	1.07947	0.110326	up	-1.13604	-0.184008	down	AT1G67800	Copine (Calcium-dependent phospholipid-binding protein) family protein [Source:EMBL;Acc:AEE34700.1]	AT1G67800 AT1G67800.2 Copine (Calcium-dependent phospholipid-binding protein) family;(source:Araport11) protein_coding (RGLG5) (RGLG5)
AT5G09570	4.57861	2.19491	up	2.10723	1.07535	up	-1.63542	-0.709657	down	-3.73309	-1.90037	down	AT5G09570	Cox19-like CHCH family protein [Source:EMBL;Acc:AED91411.1]	AT5G09570 AT5G09570.1 Cox19-like CHCH family protein;(source:Araport11) protein_coding
AT2G28890	1.56145	0.64289	up	2.10654	1.07488	up	1.234	0.303345	up	1.06705	0.0936317	up	PLL4	putative protein phosphatase 2C 23 [Source:EMBL;Acc:AEC08185.1]	AT2G28890 AT2G28890.1 Encodes a protein phosphatase 2C like gene, similar to POL. Involved in leaf development. Knockout mutants have abnormally shaped leaves. protein_coding POLTERGEIST LIKE 4 (PLL4) POLTERGEIST LIKE 4 (PLL4)
AT5G06750	1.514	0.598367	up	2.10307	1.07249	up	1.76978	0.823566	up	2.35643	1.2366	up	AT5G06750	putative protein phosphatase 2C 68 [Source:EMBL;Acc:AED91060.1]	AT5G06750 AT5G06750.1 Protein phosphatase 2C family protein;(source:Araport11) protein_coding ARABIDOPSIS PP2C CLADE D 8 (APD8) ARABIDOPSIS PP2C CLADE D 8 (APD8)
AT1G61330	-1	0	down	2.10258	1.07216	up	-4.98211	-2.31676	down	-2.02869	-1.02055	down	AT1G61330	putative FBD-associated F-box protein [Source:EMBL;Acc:AEE33821.1]	AT1G61330 AT1G61330.1 FBD, F-box and Leucine Rich Repeat domains containing protein;(source:Araport11) protein_coding
AT2G29460	2.69523	1.43041	up	2.10242	1.07205	up	-1.10211	-0.14027	down	-1.56626	-0.647325	down	GST22	glutathione S-transferase [Source:EMBL;Acc:AEC08257.1]	AT2G29460 AT2G29460.1 Encodes glutathione transferase belonging to the tau class of GSTs. Naming convention according to Wagner et al. (2002). protein_coding GLUTATHIONE S-TRANSFERASE TAU 4 (GSTU4) GLUTATHIONE S-TRANSFERASE TAU 4 (ATGSTU4);GLUTATHIONE S-TRANSFERASE 22 (GST22);GLUTATHIONE S-TRANSFERASE TAU 4 (GSTU4)
AT4G38260	1.4699	0.555723	up	2.10137	1.07133	up	1.23336	0.302591	up	1.59638	0.674802	up	AT4G38260	uncharacterized protein [Source:EMBL;Acc:AEE86906.1]	AT4G38260 AT4G38260.1 transport/golgi organization-like protein (DUF833);(source:Araport11) protein_coding
AT1G20780	2.04093	1.02923	up	2.09799	1.06901	up	1.45494	0.540962	up	1.21038	0.275455	up	PUB44	U-box domain-containing protein 44 [Source:EMBL;Acc:AEE30021.1]	AT1G20780 AT1G20780.1 Encodes a protein containing a U-box and an ARM domain. Homozygous mutant seedlings have a seedling lethal phenotype with widespread cell death lesions throughout the cotyledons and roots. protein_coding SENESCENCE-ASSOCIATED E3 UBIQUITIN LIGASE 1 (SAUL1) PLANT U-BOX 44 (PUB44);SENESCENCE-ASSOCIATED E3 UBIQUITIN LIGASE 1 (SAUL1);ARABIDOPSIS THALIANA PLANT U-BOX 44 (ATPUB44)
AT1G75510	1.45102	0.537069	up	2.09763	1.06876	up	1.4242	0.510147	up	1.93555	0.952742	up	AT1G75510	transcription initiation factor TFIIF beta subunit [Source:EMBL;Acc:AEE35728.1]	AT1G75510 AT1G75510.1 Transcription initiation factor IIF, beta subunit;(source:Araport11) protein_coding
AT4G38550	1.67428	0.743544	up	2.09576	1.06747	up	1.80662	0.853294	up	1.94648	0.960869	up	AT4G38550	phospholipase like protein (PEARLI 4) [Source:EMBL;Acc:AEE86945.1]	AT4G38550 AT4G38550.1 phospholipase-like protein (PEARLI 4) family protein;(source:Araport11) protein_coding
AT2G35910	1.38063	0.465324	up	2.09405	1.06629	up	-1.0527	-0.0740981	down	1.12028	0.163857	up	AT2G35910	RING-H2 finger protein ATL70 [Source:EMBL;Acc:AEC09176.1]	AT2G35910 AT2G35910.1 RING/U-box superfamily protein;(source:Araport11) protein_coding
AT3G03520	1.35824	0.441739	up	2.09386	1.06616	up	1.38925	0.474304	up	1.84728	0.885399	up	NPC3	non-specific phospholipase C3 [Source:EMBL;Acc:AEE73953.1]	AT3G03520 AT3G03520.1 Lysophosphatidic acid phosphatase highly expressed during phosphate starvation and abiotic stresses. Role in lipid synthesis. protein_coding NON-SPECIFIC PHOSPHOLIPASE C3 (NPC3) NON-SPECIFIC PHOSPHOLIPASE C3 (NPC3)
AT5G47250	1.64286	0.716212	up	2.09379	1.06612	up	2.15916	1.11047	up	2.69333	1.42939	up	AT5G47250	putative disease resistance protein [Source:EMBL;Acc:AED95491.1]	AT5G47250 AT5G47250.1 LRR and NB-ARC domains-containing disease resistance protein;(source:Araport11) protein_coding
AT1G69930	1.32255	0.403325	up	2.0915	1.06454	up	-1.40492	-0.490484	down	-1.12269	-0.166965	down	ATGSTU11	glutathione S-transferase TAU 11 [Source:EMBL;Acc:AEE34999.1]	AT1G69930 AT1G69930.1 Encodes glutathione transferase belonging to the tau class of GSTs. Naming convention according to Wagner et al. (2002). protein_coding GLUTATHIONE S-TRANSFERASE TAU 11 (GSTU11) GLUTATHIONE S-TRANSFERASE TAU 11 (GSTU11);GLUTATHIONE S-TRANSFERASE TAU 11 (ATGSTU11)
AT5G64510	2.43626	1.28467	up	2.09122	1.06435	up	1.40291	0.488424	up	1.05886	0.0825143	up	TIN1	uncharacterized protein [Source:EMBL;Acc:AED97909.1]	AT5G64510 AT5G64510.1 Encodes Tunicamycin Induced 1(TIN1), a plant-speci_x001E_c ER stress-inducible protein. TIN1 mutation affects pollen surface morphology. Transcriptionally induced by treatment with the N-linked glyclsylation inhibitor tunicamycin. protein_coding TUNICAMYCIN INDUCED 1 (TIN1) TUNICAMYCIN INDUCED 1 (TIN1)
AT1G01480	2.16839	1.11662	up	2.08717	1.06155	up	-1.10782	-0.147725	down	-2.36317	-1.24072	down	ACS2	1-aminocyclopropane-1-carboxylate synthase 2 [Source:EMBL;Acc:AEE27294.1]	AT1G01480 AT1G01480.1 a member of the 1-aminocyclopropane-1-carboxylate (ACC) synthase (S-adenosyl-L-methionine methylthioadenosine-lyase, EC 4.4.1.14) gene family, isolated from a flower-specific cDNA library. protein_coding 1-AMINO-CYCLOPROPANE-1-CARBOXYLATE SYNTHASE 2 (ACS2) (AT-ACC2);1-AMINO-CYCLOPROPANE-1-CARBOXYLATE SYNTHASE 2 (ACS2)
AT3G57380	1.91227	0.935287	up	2.08643	1.06104	up	-1.51536	-0.599663	down	-1.42315	-0.509086	down	AT3G57380	Glycosyltransferase family 61 protein [Source:EMBL;Acc:AEE79648.1]	AT3G57380 AT3G57380.1 Glycosyltransferase family 61 protein;(source:Araport11) protein_coding
AT1G52200	1.0706	0.0984197	up	2.08524	1.06021	up	-1.19045	-0.251505	down	1.24817	0.319813	up	AT1G52200	PLAC8 family protein [Source:EMBL;Acc:AEE32768.1]	AT1G52200 AT1G52200.1 PLAC8 family protein;(source:Araport11) protein_coding
AT2G36330	1.45543	0.541442	up	2.08449	1.05969	up	1.02694	0.0383554	up	1.24629	0.317639	up	AT2G36330	uncharacterized protein [Source:EMBL;Acc:AEC09234.1]	AT2G36330 AT2G36330.1 Uncharacterized protein family (UPF0497);(source:Araport11) protein_coding CASP-LIKE PROTEIN 4A3 (CASPL4A3) CASP-LIKE PROTEIN 4A3 (CASPL4A3)
AT1G23450	3.86117	1.94904	up	2.08298	1.05865	up	-1.56292	-0.644244	down	-4.26851	-2.09373	down	AT1G23450	pentatricopeptide repeat-containing protein-like protein [Source:EMBL;Acc:AEE30388.1]	AT1G23450 AT1G23450.1 pentatricopeptide (PPR) repeat-containing protein protein_coding
AT3G13790	1.38325	0.468065	up	2.08245	1.05828	up	1.31384	0.393785	up	1.10904	0.149312	up	ATCWINV1	beta-fructofuranosidase [Source:EMBL;Acc:AEE75414.1]	AT3G13790 AT3G13790.1 Encodes a protein with invertase activity. protein_coding (ATBFRUCT1) ARABIDOPSIS THALIANA CELL WALL INVERTASE 1 (ATCWINV1); (ATCWI1); (CWI1); (ATBFRUCT1)
AT3G19270	2.39283	1.25872	up	2.07975	1.05641	up	-1.07177	-0.0999954	down	1.49231	0.577548	up	CYP707A4	abscisic acid 8'-hydroxylase 4 [Source:EMBL;Acc:AEE76215.1]	AT3G19270 AT3G19270.1 Encodes a protein with ABA 8'-hydroxylase activity, involved in ABA catabolism. Member of the CYP707A gene family. protein_coding "CYTOCHROME P450, FAMILY 707, SUBFAMILY A, POLYPEPTIDE 4" (CYP707A4) "CYTOCHROME P450, FAMILY 707, SUBFAMILY A, POLYPEPTIDE 4" (CYP707A4)
AT4G19660	2.27432	1.18544	up	2.07835	1.05544	up	1.33036	0.411818	up	1.30462	0.383626	up	NPR4	NPR1-like protein 4 [Source:EMBL;Acc:AEE84211.1]	AT4G19660 AT4G19660.1 Encodes NPR4, a ankyrin repeat BTB/POZ domain-containing protein with 36% sequence identity with NPR1. Mutants are more susceptible to the bacterial pathogen Pseudomonas syringe pv. tomato DC3000 and to the fungal pathogen Erysiphe cichoracearum, but do not differ markedly from wild type in interaction with virulent and avirulent strains of the oomycete Peronospora parasitic…
AT2G04400	1.34289	0.425344	up	2.07672	1.05431	up	1.06303	0.0881853	up	1.10087	0.13864	up	AT2G04400	indole-3-glycerol phosphate synthase [Source:EMBL;Acc:AEC05831.1]	AT2G04400 AT2G04400.1 Aldolase-type TIM barrel family protein;(source:Araport11) protein_coding
AT1G61410	1.53978	0.622727	up	2.07662	1.05424	up	1.4114	0.497128	up	1.25134	0.323477	up	AT1G61410	DNA double-strand break repair and VJ recombination XRCC4 protein [Source:EMBL;Acc:AEE33833.1]	AT1G61410 AT1G61410.1 DNA double-strand break repair and VJ recombination XRCC4;(source:Araport11) protein_coding
AT2G32670	1.09732	0.133978	up	2.07628	1.054	up	-1.60597	-0.683441	down	-1.34582	-0.428484	down	VAMP725	vesicle-associated membrane protein 725 [Source:EMBL;Acc:AEC08714.1]	AT2G32670 AT2G32670.1 member of Synaptobrevin -like protein family protein_coding VESICLE-ASSOCIATED MEMBRANE PROTEIN 725 (VAMP725) VESICLE-ASSOCIATED MEMBRANE PROTEIN 725 (ATVAMP725);VESICLE-ASSOCIATED MEMBRANE PROTEIN 725 (VAMP725)
AT5G56110	1.33689	0.418885	up	2.07477	1.05295	up	-2.63512	-1.39787	down	-1.60382	-0.681515	down	MS188	myb domain protein 103 [Source:EMBL;Acc:AED96722.1]	AT5G56110 AT5G56110.1 Encodes a member of the R2R3 MYB transcription factor gene family that is required for anther development by regulation tapetum development, callose dissolution and exine formation. It acts upstream of MS2. protein_coding (MYB80) MYB DOMAIN PROTEIN 103 (AtMYB103);ARABIDOPSIS THALIANA MYB DOMAIN PROTEIN 80 (ATMYB80); (MYB80);MYB DOMAIN PROTEIN 103 (MYB103);MALE STERILE 188 (M…
AT4G10507	-1	0	down	2.07477	1.05295	up	-1	0	down	2.19655	1.13524	up	AT4G10507	other RNA.[Source:TAIR;Acc:AT4G10507]	AT4G10507 AT4G10507.1 other_RNA;(source:Araport11) other_rna
AT5G59720	2.6516	1.40686	up	2.07441	1.0527	up	-1.1053	-0.144441	down	-1.77901	-0.831073	down	HSP18.2	heat shock protein 18.2 [Source:EMBL;Acc:AED97223.1]	AT5G59720 AT5G59720.1 encodes a low molecular weight heat shock protein that contains the heat shock element in the promoter region. Expression is induced in response to heat shock. protein_coding HEAT SHOCK PROTEIN 18.2 (HSP18.2) HEAT SHOCK PROTEIN 18.2 (HSP18.2)
AT5G44070	1.60823	0.68547	up	2.07088	1.05025	up	1.97872	0.984571	up	2.07815	1.0553	up	ARA8	glutathione gamma-glutamylcysteinyltransferase 1 [Source:EMBL;Acc:AED95055.1]	AT5G44070 AT5G44070.1 Phytochelatin synthase gene confers tolerance to cadmium ions. Catalyzes phytochelatin (PC) synthesis from glutathione (GSH) in the presence of Cd2+, Zn2+, Cu2+ and Fe3+, but not by Co2+ or Ni2+. The mRNA is cell-to-cell mobile. protein_coding CADMIUM SENSITIVE 1 (CAD1) CADMIUM SENSITIVE 1 (CAD1);PHYTOCHELATIN SYNTHASE 1 (PCS1);ARABIDOPSIS THALIANA PHYTOCHELATIN SYNTHASE 1 (…
AT2G07701	1.11054	0.151261	up	2.06806	1.04828	up	-1.12179	-0.165802	down	1.10102	0.13884	up	AT2G07701	uncharacterized protein [Source:EMBL;Acc:AEC06091.1]	AT2G07701 AT2G07701.1 hypothetical protein;(source:Araport11) protein_coding
AT2G31880	2.453	1.29455	up	2.0678	1.0481	up	2.18539	1.12789	up	1.93718	0.953961	up	SOBIR1	putative leucine-rich repeat transmembrane protein kinase [Source:EMBL;Acc:AEC08599.1]	AT2G31880 AT2G31880.1 Encodes a putative leucine rich repeat transmembrane protein that is expressed in response to Pseudomonas syringae. Expression of SRRLK may be required for silencing via lsiRNAs. Regulates cell death and innate immunity. protein_coding SUPPRESSOR OF BIR1 1 (SOBIR1) EVERSHED (EVR);SUPPRESSOR OF BIR1 1 (SOBIR1)
AT1G65730	1.48605	0.571484	up	2.06292	1.04469	up	1.00736	0.0105834	up	-1.05083	-0.0715332	down	YSL7	putative metal-nicotianamine transporter YSL7 [Source:EMBL;Acc:AEE34418.1]	AT1G65730 AT1G65730.1 Arabidopsis thaliana metal-nicotianamine transporter YSL4 protein_coding YELLOW STRIPE LIKE 7 (YSL7) YELLOW STRIPE LIKE 7 (YSL7)
AT2G17130	1.4715	0.55729	up	2.06186	1.04395	up	1.2558	0.328608	up	1.44934	0.5354	up	IDH-II	Isocitrate dehydrogenase [NAD] regulatory subunit 2 [Source:EMBL;Acc:AEC06588.1]	AT2G17130 AT2G17130.1 Encodes a regulatory subunit of the mitochondrially-localized NAD+- dependent isocitrate dehydrogenase. protein_coding ISOCITRATE DEHYDROGENASE SUBUNIT 2 (IDH2) ISOCITRATE DEHYDROGENASE SUBUNIT 2 (IDH2);ISOCITRATE DEHYDROGENASE II (IDH-II)
AT3G50140	1.84102	0.880503	up	2.06071	1.04314	up	3.20045	1.67827	up	2.26396	1.17885	up	AT3G50140	uncharacterized protein [Source:EMBL;Acc:AEE78631.1]	AT3G50140 AT3G50140.1 transmembrane protein, putative (DUF247);(source:Araport11) protein_coding
AT1G59710	1.47669	0.562364	up	2.05962	1.04238	up	1.67512	0.744263	up	2.06184	1.04393	up	AT1G59710	uncharacterized protein [Source:EMBL;Acc:AEE33606.1]	AT1G59710 AT1G59710.1 actin cross-linking protein (DUF569);(source:Araport11) protein_coding
AT1G74310	2.48252	1.31181	up	2.05948	1.04228	up	1.07639	0.106195	up	-1.37875	-0.463363	down	ATHSP101	heat shock protein 101 [Source:EMBL;Acc:AEE35576.1]	AT1G74310 AT1G74310.1 Encodes ClpB1, which belongs to the Casein lytic proteinase/heat shock protein 100 (Clp/Hsp100) family. Involved in refolding of proteins which form aggregates under heat stress. Also known as AtHsp101. AtHsp101 is a cytosolic heat shock protein required for acclimation to high temperature. protein_coding HEAT SHOCK PROTEIN 101 (HSP101) HEAT SHOCK PROTEIN 101 (HSP101);HEAT S…
AT5G40370	1.38229	0.46706	up	2.05428	1.03863	up	-1.21329	-0.278926	down	1.42861	0.514615	up	AT5G40370	glutaredoxin-C2 [Source:EMBL;Acc:AED94539.1]	AT5G40370 AT5G40370.2 Glutaredoxin family protein;(source:Araport11) protein_coding GLUTAREDOXIN C2 (GRXC2) (ATGRXC2);GLUTAREDOXIN C2 (GRXC2)
AT2G17120	1.8645	0.898786	up	2.05246	1.03735	up	1.98638	0.990141	up	1.86168	0.896603	up	LYM2	LysM domain-containing GPI-anchored protein 2 [Source:EMBL;Acc:AEC06587.1]	AT2G17120 AT2G17120.1 Induction of chitin-responsive genes by chitin treatment is not blocked in the mutant. It contains a C-terminal GPI anchor signal and is an ortholog of OsCEBiP. protein_coding LYSM-CONTAINING RECEPTOR PROTEIN 1 (LYP1) LYSM DOMAIN GPI-ANCHORED PROTEIN 2 PRECURSOR (LYM2);CEBIP-LIKE 1 (CL-1);LYSM-CONTAINING RECEPTOR PROTEIN 1 (LYP1)
AT4G35985	2.23072	1.15751	up	2.05202	1.03705	up	1.26581	0.340057	up	1.19654	0.258866	up	AT4G35985	senescence/dehydration-associated protein [Source:EMBL;Acc:AEE86598.1]	AT4G35985 AT4G35985.1 Senescence/dehydration-associated protein-like protein;(source:Araport11) protein_coding
AT4G10040	1.4089	0.49457	up	2.05124	1.0365	up	-1.40911	-0.494789	down	-1.13811	-0.186642	down	CYTC-2	cytochrome c-2 [Source:EMBL;Acc:AEE82832.1]	AT4G10040 AT4G10040.1 Encodes cytochrome c. Promoter directs preferential expression in vascular tissues of cotyledons, leaves, roots, and hypocotyls, and in anthers. protein_coding CYTOCHROME C-2 (CYTC-2) CYTOCHROME C-2 (CYTC-2)
AT5G05190	1.81406	0.859219	up	2.05112	1.03641	up	1.09944	0.136773	up	-1.37196	-0.456242	down	AT5G05190	uncharacterized protein [Source:EMBL;Acc:AED90839.1]	AT5G05190 AT5G05190.1 hypothetical protein (DUF3133);(source:Araport11) protein_coding ENHANCED DISEASE RESISTANCE4 (EDR4) ENHANCED DISEASE RESISTANCE4 (EDR4)
AT2G44010	1.64529	0.718345	up	2.05083	1.03621	up	-1.20731	-0.271794	down	1.05509	0.0773616	up	AT2G44010	uncharacterized protein [Source:EMBL;Acc:AEC10361.1]	AT2G44010 AT2G44010.1 hypothetical protein;(source:Araport11) protein_coding
AT4G11850	1.82578	0.868512	up	2.05039	1.0359	up	1.93225	0.95028	up	1.66529	0.735773	up	MEE54	phospholipase D gamma 1 [Source:EMBL;Acc:AEE83058.1]	AT4G11850 AT4G11850.1 Encodes a phospholipase D (gamma) that is involved in aluminum tolerance and plays a role in membrane lipid modulation under Al stress. protein_coding PHOSPHOLIPASE D GAMMA 1 (PLDGAMMA1) MATERNAL EFFECT EMBRYO ARREST 54 (MEE54);PHOSPHOLIPASE D GAMMA 1 (PLDGAMMA1)
AT5G45380	1.58689	0.666198	up	2.04831	1.03443	up	1.36269	0.44646	up	-1.00469	-0.00674343	down	ATDUR3	solute:sodium symporter [Source:EMBL;Acc:AED95242.1]	AT5G45380 AT5G45380.1 urea-proton symporter DEGRADATION OF UREA 3 (DUR3);(source:Araport11) protein_coding DEGRADATION OF UREA 3 (DUR3) DEGRADATION OF UREA 3 (DUR3); (ATDUR3)
AT4G00290	1.71711	0.779982	up	2.04734	1.03375	up	1.55186	0.633998	up	1.64702	0.71986	up	AT4G00290	Mechanosensitive ion channel protein [Source:EMBL;Acc:AEE81850.1]	AT4G00290 AT4G00290.1 Encodes a non-selective mechanosensitive ion channel localized to the inner mitochondrial membrane. protein_coding (MSL1) (MSL1)
AT3G51540	2.4478	1.29149	up	2.04719	1.03364	up	1.31662	0.396842	up	1.49156	0.576817	up	AT3G51540	uncharacterized protein [Source:EMBL;Acc:AEE78804.1]	AT3G51540 AT3G51540.1 mucin-5AC-like protein;(source:Araport11) protein_coding
AT2G13810	6.62979	2.72896	up	2.04635	1.03305	up	3.83897	1.94072	up	4.72372	2.23992	up	ALD1	AGD2-like defense response protein 1 [Source:EMBL;Acc:AEC06261.1]	AT2G13810 AT2G13810.1 AGD2-like defense response protein 1;(source:Araport11) protein_coding AGD2-LIKE DEFENSE RESPONSE PROTEIN 1 (ALD1) AGD2-LIKE DEFENSE RESPONSE PROTEIN 1 (ALD1); (ATALD1);EDS TWO SUPPRESSOR 5 (EDTS5)
AT1G65790	3.67745	1.87871	up	2.04486	1.032	up	4.17806	2.06283	up	3.076	1.62105	up	ARK1	receptor kinase 1 [Source:EMBL;Acc:AEE34423.1]	AT1G65790 AT1G65790.1 An alternatively spliced gene that encodes a functional transmembrane receptor serine/threonine kinase, alternate form may not have transmembrane domain. protein_coding RECEPTOR KINASE 1 (RK1) RECEPTOR KINASE 1 (RK1);RECEPTOR KINASE 1 (ARK1)
AT1G15415	2.26661	1.18054	up	2.0415	1.02963	up	-2.30329	-1.20369	down	-1.47695	-0.562624	down	AT1G15415	uncharacterized protein [Source:EMBL;Acc:AEE29320.1]	AT1G15415 AT1G15415.1 The protein encoded by this gene was identified as a part of pollen proteome by mass spec analysis. It has weak homology to LEA (late embryo abundant) proteins. Encodes protein phosphatase 2A (PP2A) B'gamma subunit. Targeted to nucleus and cytosol. protein_coding
AT2G02360	1.79752	0.84601	up	2.04118	1.0294	up	1.67356	0.742921	up	1.71147	0.775239	up	AtPP2-B10	F-box protein PP2-B10 [Source:EMBL;Acc:AEC05569.1]	AT2G02360 AT2G02360.1 Encodes an F-box protein containing a Nictaba-related lectin domain that can act as a carbohydrate-binding protein.Expression is induced by SA and pathogenic bacteria. protein_coding PHLOEM PROTEIN 2-B10 (PP2-B10) PHLOEM PROTEIN 2-B10 (PP2-B10);PHLOEM PROTEIN 2-B10 (AtPP2-B10)
AT3G52430	1.92619	0.945753	up	2.03916	1.02797	up	2.13002	1.09087	up	2.3549	1.23567	up	PAD4	protein PHYTOALEXIN DEFICIENT 4 [Source:EMBL;Acc:AEE78945.1]	AT3G52430 AT3G52430.1 Encodes a lipase-like gene that is important for salicylic acid signaling and function in resistance (R) gene-mediated and basal plant disease resistance. PAD4 can interact directly with EDS1, another disease resistance signaling protein. Expressed at elevated level in response to green peach aphid (GPA) feeding, and modulates the GPA feeding-induced leaf senescence through …
AT2G44890	1.80549	0.852388	up	2.03828	1.02735	up	1.49103	0.576313	up	2.41107	1.26967	up	CYP704A1	cytochrome P450, family 704, subfamily A, polypeptide 1 [Source:EMBL;Acc:AEC10480.1]	AT2G44890 AT2G44890.1 member of CYP704A protein_coding "CYTOCHROME P450, FAMILY 704, SUBFAMILY A, POLYPEPTIDE 1" (CYP704A1) "CYTOCHROME P450, FAMILY 704, SUBFAMILY A, POLYPEPTIDE 1" (CYP704A1)
AT5G56250	1.79792	0.846331	up	2.03705	1.02648	up	2.05842	1.04153	up	1.83124	0.872822	up	HAP8	protein hapless 8 [Source:EMBL;Acc:AED96741.1]	AT5G56250 AT5G56250.2 hapless 8;(source:Araport11) protein_coding HAPLESS 8 (HAP8) HAPLESS 8 (HAP8)
AT5G40760	1.62205	0.697819	up	2.03566	1.02549	up	1.06995	0.0975456	up	1.00363	0.00522232	up	G6PD6	glucose-6-phosphate dehydrogenase 6 [Source:EMBL;Acc:AED94591.1]	AT5G40760 AT5G40760.1 Encodes a cytosolic glucose-6-phosphate dehydrogenase that is insensitive to reduction by DTT and whose mRNA is expressed ubiquitously. The mRNA is cell-to-cell mobile. protein_coding GLUCOSE-6-PHOSPHATE DEHYDROGENASE 6 (G6PD6) GLUCOSE-6-PHOSPHATE DEHYDROGENASE 6 (G6PD6)
AT2G07666	1.27221	0.347339	up	2.03498	1.02501	up	1.13356	0.180855	up	1.2309	0.29971	up	AT2G07666	Pseudogene of AT2G07701.[Source:TAIR;Acc:AT2G07666]	AT2G07666 AT2G07666.1 Pseudogene of AT2G07701 pseudogene
AT1G74300	2.04516	1.03221	up	2.03489	1.02495	up	1.88554	0.914981	up	1.81861	0.862838	up	AT1G74300	esterase/lipase/thioesterase family protein [Source:EMBL;Acc:AEE35575.1]	AT1G74300 AT1G74300.1 alpha/beta-Hydrolases superfamily protein;(source:Araport11) protein_coding
AT1G60890	1.64409	0.717291	up	2.03262	1.02334	up	1.75124	0.808375	up	1.61243	0.689232	up	AT1G60890	phosphatidylinositol-4-phosphate 5-kinase 8 [Source:EMBL;Acc:AEE33744.1]	AT1G60890 AT1G60890.2 Phosphatidylinositol-4-phosphate 5-kinase family protein;(source:Araport11) protein_coding
AT3G06420	2.26747	1.18109	up	2.03127	1.02238	up	-1.73589	-0.795677	down	-1.45406	-0.540085	down	ATG8H	autophagy-related protein 8h [Source:EMBL;Acc:AEE74390.1]	AT3G06420 AT3G06420.1 Ubiquitin-like superfamily protein;(source:Araport11) protein_coding AUTOPHAGY 8H (ATG8H) AUTOPHAGY 8H (ATG8H)
AT5G39950	1.56173	0.643143	up	2.03112	1.02227	up	1.51285	0.597273	up	2.19966	1.13728	up	TRX2	thioredoxin H2 [Source:EMBL;Acc:AED94495.1]	AT5G39950 AT5G39950.1 encodes a cytosolic thioredoxin that reduces disulfide bridges of target proteins by the reversible formation of a disulfide bridge between two neighboring Cys residues present in the active site. Thioredoxins have been found to regulate a variety of biological reactions in prokaryotic and eukaryotic cells. protein_coding THIOREDOXIN 2 (TRX2) THIOREDOXIN 2 (ATTRX2);ARABIDOPS…
AT4G11260	1.49113	0.576404	up	2.02906	1.02081	up	1.51992	0.603999	up	1.89658	0.923397	up	EDM1	phosphatase SGT1b [Source:EMBL;Acc:AEE82990.1]	AT4G11260 AT4G11260.1 Functions in plant disease resistance signaling, SCF(TIR1) mediated degradation of Aux/IAA proteins and HSP90 mediated degradation of R resistance proteins. AtSGT1a and AtSGT1b are functionally redundant in the resistance to pathogenes. AtSGT1b was more highly expressed than AtSGT1. The N-terminal TPR domain of AtSGT1a reduces the steady-state level of Arabidopsis SGT1 prote…
AT3G08690	1.51174	0.596215	up	2.02783	1.01994	up	-1.33118	-0.412704	down	1.13832	0.186908	up	UBC11	ubiquitin-conjugating enzyme E2 11 [Source:EMBL;Acc:AEE74665.1]	AT3G08690 AT3G08690.1 ubiquitin-conjugating enzyme 11;(source:Araport11) protein_coding UBIQUITIN-CONJUGATING ENZYME 11 (UBC11) (ATUBC11);UBIQUITIN-CONJUGATING ENZYME 11 (UBC11)
AT3G13330	2.00339	1.00244	up	2.02707	1.01939	up	1.2289	0.297367	up	1.11665	0.159181	up	PA200	proteasome activator subunit 4 [Source:EMBL;Acc:AEE75334.1]	AT3G13330 AT3G13330.1 Encodes a protein that interacts with the 26S proteasome. Mutants are phenotypically indistinguishable from wild type plants under a variety of growth conditions. Protein levels increase upon exposure of seedlings to MG132, a specific, potent, reversible, and cell-permeable proteasome inhibitor. protein_coding PROTEASOME ACTIVATING PROTEIN 200 (PA200) PROTEASOME ACTIVATING P…
AT4G33300	1.75881	0.814598	up	2.02608	1.01869	up	1.51433	0.598676	up	1.37019	0.454376	up	ADR1-L1	putative disease resistance protein ADR1-like 1 [Source:EMBL;Acc:AEE86204.1]	AT4G33300 AT4G33300.1 Encodes a member of the ADR1 family nucleotide-binding leucine-rich repeat (NB-LRR) immune receptors. protein_coding ADR1-LIKE 1 (ADR1-L1) ADR1-LIKE 1 (ADR1-L1)
AT2G38250	1.19956	0.262509	up	2.02566	1.01839	up	-2.04581	-1.03267	down	-1.49412	-0.579298	down	AT2G38250	DNA-binding protein [Source:EMBL;Acc:AEC09513.1]	AT2G38250 AT2G38250.1 Homeodomain-like superfamily protein;(source:Araport11) protein_coding
AT1G02920	1.16758	0.223521	up	2.02426	1.01739	up	1.09166	0.126521	up	1.11266	0.154019	up	GST11	glutathione S-transferase 11 [Source:EMBL;Acc:AEE27496.1]	AT1G02920 AT1G02920.1 Encodes glutathione transferase belonging to the phi class of GSTs. Naming convention according to Wagner et al. (2002). protein_coding GLUTATHIONE S-TRANSFERASE 7 (GSTF7) GLUTATHIONE S-TRANSFERASE 7 (GSTF7); (ATGSTF8);GLUTATHIONE S-TRANSFERASE 11 (GST11); (ATGSTF7);ARABIDOPSIS GLUTATHIONE S-TRANSFERASE 11 (ATGST11)
AT1G69900	1.2336	0.302874	up	2.02378	1.01705	up	1.58229	0.662015	up	1.49142	0.576688	up	AT1G69900	Actin cross-linking protein [Source:EMBL;Acc:AEE34996.1]	AT1G69900 AT1G69900.1 Actin cross-linking protein;(source:Araport11) protein_coding
AT2G31030	3.08839	1.62685	up	2.02321	1.01664	up	1.09491	0.130815	up	1.05062	0.0712431	up	ORP1B	oxysterol binding protein-related protein 1B [Source:EMBL;Acc:AEC08480.1]	AT2G31030 AT2G31030.1 OSBP(oxysterol binding protein)-related protein 1B;(source:Araport11) protein_coding OSBP(OXYSTEROL BINDING PROTEIN)-RELATED PROTEIN 1B (ORP1B) OSBP(OXYSTEROL BINDING PROTEIN)-RELATED PROTEIN 1B (ORP1B)
AT1G63460	1.36687	0.450873	up	2.02125	1.01525	up	1.30688	0.386122	up	2.11453	1.08034	up	ATGPX8	glutathione peroxidase [Source:EMBL;Acc:AEE34102.1]	AT1G63460 AT1G63460.1 Encodes GPX8 (glutathione peroxidase 8). Involved in the suppression of oxidative damages in nucleus and cytosol. The mRNA is cell-to-cell mobile. protein_coding GLUTATHIONE PEROXIDASE 8 (GPX8) GLUTATHIONE PEROXIDASE 8 (GPX8); (ATGPX8); (GPXL8)
AT5G43860	1.40706	0.492686	up	2.02065	1.01482	up	-1.30093	-0.37954	down	1.16716	0.222997	up	ATCLH2	chlorophyllase 2 [Source:EMBL;Acc:AED95018.1]	AT5G43860 AT5G43860.1 Encodes a chlorophyllase, the first enzyme in chlorophyll degradation. It catalyzes the hydrolysis of the ester bond to chlorophyllide and phytol. AtCLH2 has a typical signal sequence for the chloroplast. Gene expression does not respond to methyljasmonate, a known promoter of senescence and chlorophyll degradation. protein_coding CHLOROPHYLLASE 2 (CLH2) ARABIDOPSIS THALIANA…
AT4G02405	1.50246	0.587331	up	2.01068	1.00768	up	1.53736	0.620453	up	1.95721	0.968797	up	AT4G02405	leucine carboxyl methyltransferase domain-containing protein [Source:EMBL;Acc:AEE82166.1]	AT4G02405 AT4G02405.1 S-adenosyl-L-methionine-dependent methyltransferases superfamily protein;(source:Araport11) protein_coding
AT3G50950	2.40535	1.26624	up	2.00677	1.00488	up	2.32758	1.21883	up	2.12229	1.08562	up	ZAR1	disease resistance RPP13-like protein 4 [Source:EMBL;Acc:AEE78731.1]	AT3G50950 AT3G50950.2 Encodes a canonical CC-type NLR protein that is required for the recognition of the T3SE HopZ1a from the pathogenic bacteria P. syringae. protein_coding HOPZ-ACTIVATED RESISTANCE 1 (ZAR1) HOPZ-ACTIVATED RESISTANCE 1 (ZAR1)
AT4G22070	1.63679	0.710867	up	2.00672	1.00484	up	-1.46678	-0.552653	down	-2.03683	-1.02633	down	WRKY31	WRKY DNA-binding protein 31 [Source:EMBL;Acc:AEE84546.1]	AT4G22070 AT4G22070.1 member of WRKY Transcription Factor; Group II-b protein_coding WRKY DNA-BINDING PROTEIN 31 (WRKY31) (AtWRKY31);WRKY DNA-BINDING PROTEIN 31 (WRKY31)
AT4G23270	1.67855	0.74722	up	2.00568	1.00409	up	1.32417	0.405091	up	1.139	0.187768	up	CRK19	cysteine-rich receptor-like protein kinase 19 [Source:EMBL;Acc:AEE84731.1]	AT4G23270 AT4G23270.1 Encodes a cysteine-rich receptor-like protein kinase. The mRNA is cell-to-cell mobile. protein_coding CYSTEINE-RICH RLK (RECEPTOR-LIKE PROTEIN KINASE) 19 (CRK19) CYSTEINE-RICH RLK (RECEPTOR-LIKE PROTEIN KINASE) 19 (CRK19)
AT4G09230	1.17384	0.23123	up	2.00517	1.00372	up	-1.5498	-0.632081	down	1.10222	0.140413	up	AT4G09230	transposable element gene.[Source:TAIR;Acc:AT4G09230]	AT4G09230 AT4G09230.1 transposable_element_gene;(source:Araport11);pseudogene, hypothetical protein;(source:TAIR10) transposable_element_gene
AT4G09280	1.17384	0.23123	up	2.00517	1.00372	up	-1.5498	-0.632081	down	1.10222	0.140413	up	AT4G09280	transposable element gene.[Source:TAIR;Acc:AT4G09280]	AT4G09280 AT4G09280.1 transposable_element_gene;(source:Araport11);similar to Ulp1 protease family protein [Arabidopsis thaliana] (TAIR:AT2G24930.1);(source:TAIR10) transposable_element_gene
AT1G30860	1.58602	0.665414	up	2.00487	1.00351	up	1.49588	0.580992	up	1.72193	0.784023	up	AT1G30860	RING/U-box domain-containing protein [Source:EMBL;Acc:AEE31286.1]	AT1G30860 AT1G30860.1 RING/U-box superfamily protein;(source:Araport11) protein_coding
AT2G31570	1.4691	0.55493	up	2.00426	1.00307	up	1.0416	0.0587983	up	1.50501	0.58977	up	ATGPX2	glutathione peroxidase [Source:EMBL;Acc:AEC08562.1]	AT2G31570 AT2G31570.1 glutathione peroxidase GPx protein_coding GLUTATHIONE PEROXIDASE 2 (GPX2) GLUTATHIONE PEROXIDASE 2 (ATGPX2); (GPXL2);GLUTATHIONE PEROXIDASE 2 (GPX2)
AT4G19045	1.26468	0.33877	up	2.00284	1.00205	up	1.06509	0.090982	up	1.85456	0.891075	up	AT4G19045	Mob1/phocein family protein [Source:EMBL;Acc:AEE84133.1]	AT4G19045 AT4G19045.1 Mob1/phocein family protein;(source:Araport11) protein_coding (MOB1B) (MOB1B)
AT1G33055	2.9613	1.56623	up	2.00186	1.00134	up	-2.73477	-1.45142	down	3.65084	1.86823	up	AT1G33055	uncharacterized protein [Source:EMBL;Acc:AEE31557.1]	AT1G33055 AT1G33055.1 hypothetical protein;(source:Araport11) protein_coding
AT2G39420	1.5991	0.677264	up	2.00126	1.00091	up	1.33834	0.420441	up	2.08425	1.05953	up	AT2G39420	alpha/beta-hydrolase domain-containing protein [Source:EMBL;Acc:AEC09673.1]	AT2G39420 AT2G39420.1 alpha/beta-Hydrolases superfamily protein;(source:Araport11) protein_coding (MAGL8) (MAGL8)
AT4G37220	1.25076	0.322803	up	2.00083	1.0006	up	-2.84518	-1.50852	down	-1.22105	-0.288118	down	AT4G37220	cold acclimation protein WCOR413 [Source:EMBL;Acc:AEE86769.1]	AT4G37220 AT4G37220.1 Cold acclimation protein WCOR413 family;(source:Araport11) protein_coding
AT4G39230	1.19027	0.251288	up	2.0008	1.00057	up	1.67332	0.742713	up	2.05896	1.04192	up	AT4G39230	NmrA-like negative transcriptional regulator family protein [Source:EMBL;Acc:AEE87040.1]	AT4G39230 AT4G39230.1 encodes a protein whose sequence is similar to phenylcoumaran benzylic ether reductase (PCBER), which catalyzes NADPH-dependent reduction of 8-5' linked lignans such as dehydrodiconiferyl alcohol to give isodihydrodehydrodiconiferyl alcohol. protein_coding PHENYLCOUMARAN BENZYLIC ETHER REDUCTASE 1 (PCBER1) PHENYLCOUMARAN BENZYLIC ETHER REDUCTASE 1 (PCBER1); (ATPCBER1)
AT2G39270	1.5936	0.672288	up	2.00078	1.00056	up	1.41874	0.504611	up	1.70554	0.770227	up	AT2G39270	P-loop containing nucleoside triphosphate hydrolase-like protein [Source:EMBL;Acc:AEC09652.1]	AT2G39270 AT2G39270.1 P-loop containing nucleoside triphosphate hydrolases superfamily protein;(source:Araport11) protein_coding
AT5G20400	1.40017	0.485601	up	2.00021	1.00015	up	-1.07538	-0.104849	down	-1.1436	-0.193583	down	AT5G20400	oxidoreductase, 2OG-Fe(II) oxygenase family protein [Source:EMBL;Acc:AED92839.1]	AT5G20400 AT5G20400.1 encodes a protein whose sequence is similar to flavanone 3 hydroxylase from Malus. The mRNA is cell-to-cell mobile. protein_coding
AT5G42490	4.39443	2.13568	up	1.99989	0.999923	up	-1.12591	-0.171094	down	-2.81108	-1.49113	down	AT5G42490	ATP binding microtubule motor family protein [Source:EMBL;Acc:AED94816.1]	AT5G42490 AT5G42490.1 ATP binding microtubule motor family protein;(source:Araport11) protein_coding
AT4G02420	3.02318	1.59607	up	1.99568	0.996882	up	2.69962	1.43276	up	-1.01973	-0.0281854	down	AT4G02420	concanavalin A-like lectin kinase-like protein [Source:EMBL;Acc:AEE82168.1]	AT4G02420 AT4G02420.1 Concanavalin A-like lectin protein kinase family protein;(source:Araport11) protein_coding L-TYPE LECTIN RECEPTOR KINASE IV.4 (LECRK-IV.4) L-TYPE LECTIN RECEPTOR KINASE IV.4 (LECRK-IV.4)
AT1G49750	2.50995	1.32766	up	1.99142	0.993795	up	2.86869	1.52039	up	2.34814	1.23152	up	AT1G49750	leucine-rich repeat-like protein [Source:EMBL;Acc:AEE32471.1]	AT1G49750 AT1G49750.1 Leucine-rich repeat (LRR) family protein;(source:Araport11) protein_coding
AT4G36950	5.12932	2.35877	up	1.99027	0.992963	up	2.22109	1.15127	up	1.85072	0.888091	up	MAPKKK21	mitogen-activated protein kinase kinase kinase 21 [Source:EMBL;Acc:AEE86723.1]	AT4G36950 AT4G36950.1 member of MEKK subfamily protein_coding MITOGEN-ACTIVATED PROTEIN KINASE KINASE KINASE 21 (MAPKKK21) MITOGEN-ACTIVATED PROTEIN KINASE KINASE KINASE 21 (MAPKKK21)
AT5G40000	6.80712	2.76704	up	1.98214	0.987057	up	1.73511	0.795028	up	2.33057	1.22069	up	AT5G40000	AAA-type ATPase family protein [Source:EMBL;Acc:AED94500.1]	AT5G40000 AT5G40000.1 P-loop containing nucleoside triphosphate hydrolases superfamily protein;(source:Araport11) protein_coding
AT2G20770	2.01624	1.01167	up	1.98028	0.985704	up	1.60401	0.681681	up	1.5304	0.613913	up	GCL2	protein GCR2-LIKE 2 [Source:EMBL;Acc:AEC07068.1]	AT2G20770 AT2G20770.1 Encodes a protein with reported similarity to GCR2 a putative G protein coupled receptor thought to be an ABA receptor.GCL2 also has similarity to LANCL1 and LANCL2, human homologs of bacterial lanthionine synthetase. protein_coding GCR2-LIKE 2 (GCL2) GCR2-LIKE 2 (GCL2)
AT2G43920	2.07705	1.05454	up	1.97777	0.983871	up	1.83736	0.877633	up	2.00964	1.00693	up	HOL2	putative thiol methyltransferase 1 [Source:EMBL;Acc:AEC10347.1]	AT2G43920 AT2G43920.1 S-adenosyl-L-methionine-dependent methyltransferases superfamily protein;(source:Araport11) protein_coding HARMLESS TO OZONE LAYER 2 (HOL2) (ATHOL2);HARMLESS TO OZONE LAYER 2 (HOL2)
AT1G73810	2.90921	1.54063	up	1.97641	0.982884	up	-1.32667	-0.407807	down	-2.13275	-1.09272	down	AT1G73810	core-2/I-branching beta-1,6-N-acetylglucosaminyltransferase-like protein [Source:EMBL;Acc:AEE35511.1]	AT1G73810 AT1G73810.1 Core-2/I-branching beta-1,6-N-acetylglucosaminyltransferase family protein;(source:Araport11) protein_coding
AT1G66570	13.2173	3.72435	up	1.97603	0.982608	up	-1.99711	-0.997915	down	-10.6855	-3.41758	down	SUC7	putative sucrose transport protein SUC7 [Source:EMBL;Acc:AEE34529.1]	AT1G66570 AT1G66570.1 sucrose-proton symporter 7;(source:Araport11) protein_coding SUCROSE-PROTON SYMPORTER 7 (SUC7) SUCROSE-PROTON SYMPORTER 7 (SUC7);SUCROSE-PROTON SYMPORTER 7 (ATSUC7)
AT2G05910	2.16294	1.113	up	1.97122	0.979091	up	-1.14693	-0.197776	down	-1.01048	-0.0150416	down	AT2G05910	LURP-one-related 6 protein [Source:EMBL;Acc:AEC05983.1]	AT2G05910 AT2G05910.1 LURP-one-like protein (DUF567);(source:Araport11) protein_coding
AT1G32940	2.12642	1.08842	up	1.96937	0.977737	up	-1.36444	-0.44831	down	-2.26588	-1.18007	down	ATSBT3.5	Subtilase-like protein [Source:EMBL;Acc:AEE31542.1]	AT1G32940 AT1G32940.1 Subtilase family protein;(source:Araport11) protein_coding (SBT3.5) (SBT3.5); (ATSBT3.5)
AT3G50030	2.49293	1.31784	up	1.96184	0.972209	up	1.52362	0.607505	up	1.32321	0.404044	up	AT3G50030	ARM-repeat/tetratricopeptide repeat-like protein [Source:EMBL;Acc:AEE78619.1]	AT3G50030 AT3G50030.1 ARM-repeat/Tetratricopeptide repeat (TPR)-like protein;(source:Araport11) protein_coding
AT5G35688	2.12217	1.08554	up	1.9592	0.970262	up	-1.57428	-0.654691	down	-1.70523	-0.769968	down	AT5G35688	uncharacterized protein [Source:EMBL;Acc:AED94003.1]	AT5G35688 AT5G35688.1 This gene encodes a small protein and has either evidence of transcription or purifying selection. protein_coding
AT3G19580	2.61553	1.3871	up	1.95915	0.970227	up	-1.41053	-0.496237	down	1.35426	0.437502	up	AZF2	zinc-finger protein 2 [Source:EMBL;Acc:AEE76262.1]	AT3G19580 AT3G19580.1 Encodes zinc finger protein. mRNA levels are upregulated in response to ABA, high salt, and mild desiccation. The protein is localized to the nucleus and acts as a transcriptional repressor. protein_coding ZINC-FINGER PROTEIN 2 (ZF2) ZINC-FINGER PROTEIN 2 (ZF2);ZINC-FINGER PROTEIN 2 (AZF2)
AT1G66060	3.17906	1.6686	up	1.9585	0.969753	up	-2.6758	-1.41997	down	-2.62258	-1.39099	down	AT1G66060	uncharacterized protein [Source:EMBL;Acc:AEE34457.1]	AT1G66060 AT1G66060.1 hypothetical protein (DUF577);(source:Araport11) protein_coding
AT5G60760	2.26568	1.17995	up	1.95485	0.967061	up	-1.06831	-0.0953321	down	-1.74599	-0.804046	down	AT5G60760	2-phosphoglycerate kinase-related protein [Source:EMBL;Acc:AED97374.1]	AT5G60760 AT5G60760.1 P-loop containing nucleoside triphosphate hydrolases superfamily protein;(source:Araport11) protein_coding
AT4G11900	2.51975	1.33328	up	1.95404	0.966461	up	2.30567	1.20518	up	1.60947	0.68659	up	AT4G11900	S-locus lectin protein kinase-like protein [Source:EMBL;Acc:AEE83067.1]	AT4G11900 AT4G11900.1 S-locus lectin protein kinase family protein;(source:Araport11) protein_coding
AT2G29480	2.34862	1.23181	up	1.94481	0.959631	up	-2.55798	-1.35501	down	-3.23199	-1.69242	down	ATGSTU2	glutathione S-transferase [Source:EMBL;Acc:AEC08259.1]	AT2G29480 AT2G29480.1 Encodes glutathione transferase belonging to the tau class of GSTs. Naming convention according to Wagner et al. (2002). protein_coding GLUTATHIONE S-TRANSFERASE TAU 2 (GSTU2) GLUTATHIONE S-TRANSFERASE 20 (GST20);GLUTATHIONE S-TRANSFERASE TAU 2 (GSTU2);GLUTATHIONE S-TRANSFERASE TAU 2 (ATGSTU2)
AT1G15385	3.86347	1.9499	up	1.94199	0.957535	up	1.32741	0.408618	up	1.16239	0.217093	up	AT1G15385	uncharacterized protein [Source:EMBL;Acc:AEE29314.1]	AT1G15385 AT1G15385.1 cotton fiber protein;(source:Araport11) protein_coding
AT4G39210	2.94774	1.55961	up	1.94095	0.956766	up	2.09793	1.06897	up	1.12221	0.166337	up	APL3	glucose-1-phosphate adenylyltransferase large subunit 3 [Source:EMBL;Acc:AEE87038.1]	AT4G39210 AT4G39210.1 Encodes the large subunit of ADP-Glucose Pyrophosphorylase which catalyzes the first, rate limiting step in starch biosynthesis. The large subunit plays a regulatory role whereas the small subunit (ApS) is the catalytic isoform. Four isoforms (ApL1-4) have been identified. ApL3 is the major large subunit isoform present in inflorescences, fruits and roots. protein_coding (AP…
AT5G39040	2.0284	1.02034	up	1.93785	0.954453	up	1.17483	0.23245	up	-1.08723	-0.120661	down	ALS1	ABC transporter B family member 27 [Source:EMBL;Acc:AED94390.1]	AT5G39040 AT5G39040.1 Encodes a member of TAP subfamily of ABC transporters that is located in the vacuole. Mutants are hypersensitive to aluminum and the gene product may be important for intracellular movement of some substrate, possibly chelated Al, as part of a mechanism of aluminum sequestration. protein_coding ATP-BINDING CASSETTE B27 (ABCB27) ATP-BINDING CASSETTE B27 (ABCB27); (ATALS1);TRA…
AT1G12950	3.55912	1.83152	up	1.93338	0.951122	up	1.53914	0.622123	up	-1.01821	-0.0260336	down	RSH2	root hair specific 2 [Source:EMBL;Acc:AEE28953.1]	AT1G12950 AT1G12950.1 root hair specific 2;(source:Araport11) protein_coding ROOT HAIR SPECIFIC 2 (RHS2) ROOT HAIR SPECIFIC 3 (RHS3);ROOT HAIR SPECIFIC 2 (RSH2); (ATDTX31);RELA/SPOT HOMOLOG 2 (RSH2);ROOT HAIR SPECIFIC 2 (RHS2)
AT1G05570	2.35517	1.23583	up	1.9308	0.949197	up	1.96566	0.97501	up	1.18197	0.241189	up	ATGSL06	callose synthase 1 [Source:EMBL;Acc:AEE27855.1]	AT1G05570 AT1G05570.1 Encodes a callose synthase 1 catalytic subunit . Member of Glycosyltransferase Family- 48. protein_coding CALLOSE SYNTHASE 1 (CALS1) (ATGSL6);GLUCAN SYNTHASE-LIKE 6 (GSL6);CALLOSE SYNTHASE 1 (CALS1); (GSL06); (ATGSL06)
AT2G15490	2.31108	1.20857	up	1.92156	0.942275	up	-2.98761	-1.57899	down	-3.84093	-1.94145	down	UGT73B4	UDP-glycosyltransferase 73B4 [Source:EMBL;Acc:AEC06407.1]	AT2G15490 AT2G15490.1 UDP-glycosyltransferase 73B4;(source:Araport11) protein_coding UDP-GLYCOSYLTRANSFERASE 73B4 (UGT73B4) UDP-GLYCOSYLTRANSFERASE 73B4 (UGT73B4)
AT5G36930	2.0747	1.0529	up	1.91376	0.936408	up	2.16946	1.11734	up	1.5414	0.62424	up	AT5G36930	TIR-NBS-LRR class disease resistance protein [Source:EMBL;Acc:AED94128.1]	AT5G36930 AT5G36930.2 Disease resistance protein (TIR-NBS-LRR class) family;(source:Araport11) protein_coding
AT2G33160	9.55989	3.25699	up	1.90962	0.933285	up	-2.66199	-1.41251	down	-1.78987	-0.839853	down	AT2G33160	glycosyl hydrolase and polygalacturonase domain-containing protein [Source:EMBL;Acc:AEC08792.1]	AT2G33160 AT2G33160.1 Gene structure annotation for AT2G33160.1 is inaccurate in TAIR10, see PMID:23709666 and Comments field on the locus page for updated annotation. protein_coding NIMNA (SANSKRIT FOR '"SUNKEN" OR "LOW") (NMA) NIMNA (SANSKRIT FOR '"SUNKEN" OR "LOW") (NMA)
AT5G38200	3.40452	1.76745	up	1.90458	0.929471	up	-1.40827	-0.493926	down	-2.60169	-1.37945	down	AT5G38200	class I glutamine amidotransferase domain-containing protein [Source:EMBL;Acc:AED94280.1]	AT5G38200 AT5G38200.1 Class I glutamine amidotransferase-like superfamily protein;(source:Araport11) protein_coding
AT3G53230	2.91698	1.54448	up	1.89841	0.924793	up	-1.39819	-0.48356	down	-1.45118	-0.537222	down	AT3G53230	cell division control protein 48-D [Source:EMBL;Acc:AEE79050.1]	AT3G53230 AT3G53230.1 CDC48 is induced upon oilseed rape mosaic tobamovirus infection and appears to be involved in controlling virus movement. protein_coding CELL DIVISION CYCLE 48B (ATCDC48B) CELL DIVISION CYCLE 48B (ATCDC48B)
AT4G26090	2.20358	1.13985	up	1.89317	0.920803	up	1.77179	0.825205	up	1.51943	0.603528	up	RPS2	disease resistance protein RPS2 [Source:EMBL;Acc:AEE85156.1]	AT4G26090 AT4G26090.1 Encodes a plasma membrane protein with leucine-rich repeat, leucine zipper, and P loop domains that confers resistance to Pseudomonas syringae infection by interacting with the avirulence gene avrRpt2. RPS2 protein interacts directly with plasma membrane associated protein RIN4 and this interaction is disrupted by avrRpt2. The mRNA is cell-to-cell mobile. protein_coding RESI…
AT4G12400	2.27842	1.18803	up	1.89164	0.919635	up	1.00532	0.00765562	up	-1.81135	-0.857065	down	Hop3	putative stress-inducible protein [Source:EMBL;Acc:AEE83125.1]	AT4G12400 AT4G12400.2 Encodes one of the 36 carboxylate clamp (CC)-tetratricopeptide repeat (TPR) proteins (Prasad 2010, Pubmed ID: 20856808) with potential to interact with Hsp90/Hsp70 as co-chaperones. protein_coding HOP3 (Hop3) HOP3 (Hop3)
AT2G28400	2.05453	1.03881	up	1.88262	0.912745	up	-1.14426	-0.194417	down	1.406	0.4916	up	AT2G28400	uncharacterized protein [Source:EMBL;Acc:AEC08116.1]	AT2G28400 AT2G28400.1 senescence regulator (Protein of unknown function, DUF584);(source:Araport11) protein_coding
AT1G72800	2.06439	1.04572	up	1.88254	0.912683	up	-1.8423	-0.881507	down	-1.89585	-0.922843	down	AT1G72800	RNA-binding (RRM/RBD/RNP motifs) family protein [Source:EMBL;Acc:AEE35374.1]	AT1G72800 AT1G72800.1 RNA-binding (RRM/RBD/RNP motifs) family protein;(source:Araport11) protein_coding
AT3G49540	3.86943	1.95212	up	1.88061	0.911199	up	-2.71814	-1.44262	down	-4.13587	-2.04819	down	AT3G49540	uncharacterized protein [Source:EMBL;Acc:AEE78554.1]	AT3G49540 AT3G49540.1 hypothetical protein;(source:Araport11) protein_coding
AT5G40690	2.2083	1.14294	up	1.879	0.909965	up	-2.0054	-1.00389	down	-1.7271	-0.788348	down	AT5G40690	uncharacterized protein [Source:EMBL;Acc:AED94582.1]	AT5G40690 AT5G40690.1 histone-lysine N-methyltransferase trithorax-like protein;(source:Araport11) protein_coding
AT2G33580	3.38455	1.75896	up	1.87122	0.90398	up	3.26292	1.70616	up	2.51371	1.32982	up	AT2G33580	protein kinase family protein [Source:EMBL;Acc:AEC08855.1]	AT2G33580 AT2G33580.1 Encodes a putative LysM-containing receptor-like kinase. LYK5 is a major chitin receptor and forms a chitin-induced complex with related kinase CERK1. Based on protein sequence alignment analysis, it was determined as a pseudo kinase due to a lack of the ATP-binding P-loop in the kinase domain. protein_coding LYSM-CONTAINING RECEPTOR-LIKE KINASE 5 (LYK5) (ATLYK5);LYSM-CONTAI…
AT5G16360	2.21351	1.14633	up	1.87007	0.903089	up	-1.47004	-0.555858	down	-1.25278	-0.325134	down	AT5G16360	NC domain-containing protein-like protein [Source:EMBL;Acc:AED92283.1]	AT5G16360 AT5G16360.1 NC domain-containing protein-like protein;(source:Araport11) protein_coding
AT2G04135	3.75223	1.90775	up	1.86737	0.901011	up	-1.24591	-0.317202	down	1.06436	0.0899856	up	AT2G04135	transposable element gene.[Source:TAIR;Acc:AT2G04135]	AT2G04135 AT2G04135.1 transposable_element_gene;(source:Araport11);similar to unknown protein [Arabidopsis thaliana] (TAIR:AT5G33303.1);(source:TAIR10) transposable_element_gene
AT1G55120	2.09117	1.06431	up	1.86338	0.897923	up	2.19339	1.13316	up	1.85198	0.889072	up	ATFRUCT5	beta-fructofuranosidase, insoluble isoenzyme CWINV3 [Source:EMBL;Acc:AEE33187.1]	AT1G55120 AT1G55120.1 Encodes a protein with fructan exohydrolase (FEH) activity acting on levan-type fructans (6-FEH, levanase). The enzyme does not have invertase activity. protein_coding BETA-FRUCTOFURANOSIDASE 5 (FRUCT5) BETA-FRUCTOFURANOSIDASE 5 (ATFRUCT5);6-FRUCTAN EXOHYDROLASE (AtcwINV3);BETA-FRUCTOFURANOSIDASE 5 (FRUCT5)
AT5G25205	3.85004	1.94487	up	1.86003	0.895329	up	1.09338	0.128793	up	-2.31248	-1.20944	down	AT5G25205	transposable element gene.[Source:TAIR;Acc:AT5G25205]	AT5G25205 AT5G25205.1 transposable_element_gene;(source:Araport11);non-LTR retrotransposon family (LINE), has a 1.0e-33 P-value blast match to GB:AAA67727 reverse transcriptase (LINE-element) (Mus musculus);(source:TAIR10) transposable_element_gene
AT1G02220	2.44969	1.2926	up	1.85911	0.894613	up	-1.6768	-0.745714	down	-2.15013	-1.10442	down	ANAC003	NAC domain-containing protein 3 [Source:EMBL;Acc:AEE27404.1]	AT1G02220 AT1G02220.1 NAC domain containing protein 3;(source:Araport11) protein_coding NAC DOMAIN CONTAINING PROTEIN 3 (NAC003) NAC DOMAIN CONTAINING PROTEIN 3 (NAC003);NAC DOMAIN CONTAINING PROTEIN 3 (ANAC003)
AT3G05630	2.39516	1.26012	up	1.84861	0.886441	up	-1.15339	-0.205881	down	-1.34875	-0.43162	down	PLDZETA2	phospholipase D P2 [Source:EMBL;Acc:AEE74269.1]	AT3G05630 AT3G05630.1 Encodes a member of the PXPH-PLD subfamily of phospholipase D proteins. Regulates vesicle trafficking. Required for auxin transport and distribution and hence auxin responses. This subfamily is novel structurally different from the majority of plant PLDs by having phox homology (PX) and pleckstrin homology (PH) domains. Involved regulating root development in response to nut…
AT2G31420	2.67192	1.41788	up	1.84696	0.885156	up	-2.16788	-1.11629	down	-2.40903	-1.26845	down	AT2G31420	uncharacterized protein [Source:EMBL;Acc:AEC08544.1]	AT2G31420 AT2G31420.1 B3 domain protein (DUF313);(source:Araport11) protein_coding
AT3G12320	2.29865	1.20079	up	1.84657	0.884848	up	-1.81526	-0.860179	down	-1.03944	-0.0558116	down	AT3G12320	uncharacterized protein [Source:EMBL;Acc:AEE75183.1]	AT3G12320 AT3G12320.1 hypothetical protein;(source:Araport11) protein_coding NIGHT LIGHT-INDUCIBLE AND CLOCK-REGULATED 3 (LNK3) NIGHT LIGHT-INDUCIBLE AND CLOCK-REGULATED 3 (LNK3)
AT1G26762	2.82198	1.49671	up	1.84557	0.884067	up	-2.16573	-1.11485	down	-1.16788	-0.223892	down	AT1G26762	uncharacterized protein [Source:EMBL;Acc:AEE30730.1]	AT1G26762 AT1G26762.1 transmembrane protein;(source:Araport11) protein_coding
AT5G60310	2.56444	1.35864	up	1.84227	0.881485	up	-1.55062	-0.632842	down	-1.79331	-0.842625	down	AT5G60310	concanavalin A-like lectin kinase-like protein [Source:EMBL;Acc:AED97307.1]	AT5G60310 AT5G60310.1 Concanavalin A-like lectin protein kinase family protein;(source:Araport11) protein_coding L-TYPE LECTIN RECEPTOR KINASE I.10 (LECRK-I.10) L-TYPE LECTIN RECEPTOR KINASE I.10 (LECRK-I.10)
AT5G58820	5.35685	2.42139	up	1.83866	0.878659	up	-3.72082	-1.89562	down	-10.2394	-3.35606	down	AT5G58820	Subtilisin-like serine endopeptidase family protein [Source:EMBL;Acc:AED97107.1]	AT5G58820 AT5G58820.1 Subtilisin-like serine endopeptidase family protein;(source:Araport11) protein_coding
AT2G13640	2.40436	1.26566	up	1.83584	0.876438	up	1.69943	0.765053	up	1.29759	0.375836	up	AT2G13640	transcription factor IIS-like protein [Source:EMBL;Acc:AEC06249.1]	AT2G13640 AT2G13640.1 Transcription factor IIS family protein;(source:Araport11) protein_coding
AT4G26095	2.15872	1.11018	up	1.8324	0.873732	up	1.77978	0.831698	up	1.34621	0.428908	up	AT4G26095	other RNA.[Source:TAIR;Acc:AT4G26095]	AT4G26095 AT4G26095.1 Potential natural antisense gene, locus overlaps with AT4G26090 antisense_long_noncoding_rna
AT5G38990	2.25849	1.17536	up	1.83159	0.873095	up	2.54073	1.34524	up	1.73385	0.793979	up	AT5G38990	interleukin-1 receptor-associated kinase 4 [Source:EMBL;Acc:AED94384.1]	AT5G38990 AT5G38990.1 Malectin/receptor-like protein kinase family protein;(source:Araport11) protein_coding
AT1G65800	3.11081	1.63729	up	1.83134	0.872899	up	3.00378	1.58678	up	2.36396	1.24121	up	ARK2	receptor kinase 2 [Source:EMBL;Acc:AEE34424.1]	AT1G65800 AT1G65800.1 Encodes a putative receptor-like serine/threonine protein kinases that is similar to brassica self-incompatibility (S) locus. expressed in specifically in cotyledons, leaves, and sepals, in correlation with the maturation of these structures. Together with AtPUB9, it is required for auxin-mediated lateral root development under phosphate-starved conditions. The mRNA is cell-…
AT1G71140	2.54468	1.34749	up	1.81776	0.862158	up	-1.48363	-0.569134	down	-1.88319	-0.913181	down	AT1G71140	MATE efflux family protein [Source:EMBL;Acc:AEE35165.1]	AT1G71140 AT1G71140.1 MATE efflux family protein;(source:Araport11) protein_coding
AT1G52890	3.1593	1.65961	up	1.81691	0.86149	up	1.06265	0.0876694	up	1.52117	0.605186	up	ANAC019	NAC domain-containing protein 19 [Source:EMBL;Acc:AEE32864.1]	AT1G52890 AT1G52890.1 encodes a NAC transcription factor whose expression is induced by drought, high salt, and abscisic acid. This gene binds to ERD1 promoter in vitro. protein_coding NAC DOMAIN CONTAINING PROTEIN 19 (NAC019) NAC DOMAIN CONTAINING PROTEIN 19 (NAC019); (ANAC19);NAC DOMAIN CONTAINING PROTEIN 19 (ANAC019)
AT5G58670	2.24641	1.16762	up	1.81397	0.859151	up	2.44322	1.28879	up	3.50671	1.81012	up	ATPLC1	phosphoinositide phospholipase C 1 [Source:EMBL;Acc:AED97083.1]	AT5G58670 AT5G58670.1 phosphatidylinositol-specific phospholipase C is induced to a significant extent under various environmental stresses, such as dehydration, salinity, and low temperature. May play a role in secondary ABA response. There are two genes called ATPLC1, one corresponding to AT4g38530 and one corresponding ot AT5g58670 (this one). protein_coding PHOSPHOLIPASE C1 (PLC1) PHOSPHOLIPA…
AT2G02240	2.17526	1.12119	up	1.81345	0.858737	up	-2.00128	-1.00092	down	1.16466	0.219904	up	MEE66	F-box protein [Source:EMBL;Acc:AEC05560.1]	AT2G02240 AT2G02240.1 F-box family protein;(source:Araport11) protein_coding MATERNAL EFFECT EMBRYO ARREST 66 (MEE66) MATERNAL EFFECT EMBRYO ARREST 66 (MEE66)
AT4G22980	2.28688	1.19338	up	1.81187	0.857478	up	1.40472	0.490281	up	-1.01179	-0.0169072	down	AT4G22980	uncharacterized protein [Source:EMBL;Acc:AEE84688.1]	AT4G22980 AT4G22980.1 molybdenum cofactor sulfurase-like protein;(source:Araport11) protein_coding
AT5G46500	2.30458	1.20451	up	1.80311	0.850485	up	2.10523	1.07398	up	1.08216	0.113909	up	AT5G46500	uncharacterized protein [Source:EMBL;Acc:AED95392.1]	AT5G46500 AT5G46500.1 protein VARIATION IN COMPOUND TRIGGERED ROOT growth protein;(source:Araport11) protein_coding
AT5G23950	3.40215	1.76645	up	1.80307	0.850459	up	-1.16106	-0.215444	down	1.12279	0.167084	up	AT5G23950	calcium-dependent lipid-binding domain-containing protein [Source:EMBL;Acc:AED93237.1]	AT5G23950 AT5G23950.1 Calcium-dependent lipid-binding (CaLB domain) family protein;(source:Araport11) protein_coding
AT5G46140	2.3025	1.2032	up	1.78539	0.836235	up	-1.04526	-0.0638616	down	1.17386	0.231265	up	AT5G46140	uncharacterized protein [Source:EMBL;Acc:AED95344.1]	AT5G46140 AT5G46140.1 hypothetical protein (DUF295);(source:Araport11) protein_coding
AT2G20560	2.00901	1.00648	up	1.78142	0.833026	up	-1.10778	-0.147677	down	-1.33002	-0.411453	down	AT2G20560	DNAJ heat shock protein-like protein [Source:EMBL;Acc:AEC07028.1]	AT2G20560 AT2G20560.1 DNAJ heat shock family protein;(source:Araport11) protein_coding
AT5G26660	2.06472	1.04595	up	1.77617	0.82877	up	1.5257	0.609473	up	1.4536	0.539634	up	ATMYB86	transcription factor MYB86 [Source:EMBL;Acc:AED93580.1]	AT5G26660 AT5G26660.1 myb domain protein 86;(source:Araport11) protein_coding MYB DOMAIN PROTEIN 86 (MYB86) MYB DOMAIN PROTEIN 4 (ATMYB4-old);MYB DOMAIN PROTEIN 86 (MYB86);MYB DOMAIN PROTEIN 86 (ATMYB86);MYB DOMAIN PROTEIN 4 (ATMYB4)
AT1G72660	2.15373	1.10684	up	1.77142	0.824909	up	-1.54083	-0.623708	down	-1.4156	-0.50141	down	AT1G72660	P-loop containing nucleoside triphosphate hydrolase-like protein [Source:EMBL;Acc:AEE35358.1]	AT1G72660 AT1G72660.1 P-loop containing nucleoside triphosphate hydrolases superfamily protein;(source:Araport11) protein_coding (DRG1-3) (DRG1-3)
AT5G64250	2.57106	1.36237	up	1.76687	0.821193	up	-1.85092	-0.888242	down	-2.55781	-1.35491	down	AT5G64250	Aldolase-type TIM barrel family protein [Source:EMBL;Acc:AED97861.1]	AT5G64250 AT5G64250.2 Aldolase-type TIM barrel family protein;(source:Araport11) protein_coding
AT1G16510	2.14977	1.10418	up	1.76184	0.817084	up	-1.27462	-0.350072	down	-1.52947	-0.613032	down	AT1G16510	SAUR-like auxin-responsive protein [Source:EMBL;Acc:AEE29463.1]	AT1G16510 AT1G16510.1 Encodes a clade III SAUR gene with a distinctive expression pattern in root meristems. It is normally expressed in the quiescent center and cortex/endodermis initials and upon auxin stimulation, the expression is found in the endodermal layer. Overexpression studies suggest roles in cell expansion and auxin transport. protein_coding SMALL AUXIN UPREGULATED 41 (SAUR41) SMALL …
AT2G03360	2.78003	1.4751	up	1.7611	0.816478	up	1.11576	0.158025	up	1.11035	0.151009	up	AT2G03360	Glycosyltransferase family 61 protein [Source:EMBL;Acc:AEC05692.1]	AT2G03360 AT2G03360.2 Glycosyltransferase family 61 protein;(source:Araport11) protein_coding
AT1G09180	3.65251	1.86889	up	1.76073	0.816174	up	-1.29647	-0.37459	down	-1.73163	-0.79213	down	ATSARA1A	Arf/Sar family protein [Source:EMBL;Acc:AEE28409.1]	AT1G09180 AT1G09180.1 A member of ARF-like GTPase family. A thaliana has 21 members, in two subfamilies, ARF and ARF-like (ARL) GTPases. protein_coding SECRETION-ASSOCIATED RAS SUPER FAMILY 1 (SARA1A) SECRETION-ASSOCIATED RAS 1 (ATSAR1);SECRETION-ASSOCIATED RAS SUPER FAMILY 1 (SARA1A);SECRETION-ASSOCIATED RAS SUPER FAMILY 1 (ATSARA1A)
AT3G44300	2.1703	1.11789	up	1.75506	0.811522	up	-1.91155	-0.934741	down	-1.25602	-0.328863	down	AtNIT2	nitrilase 2 [Source:EMBL;Acc:AEE77886.1]	AT3G44300 AT3G44300.1 Encodes an enzyme that catalyzes the hydrolysis of indole-3-acetonitrile (IAN) to indole-3-acetic acid (IAA) (nitrile aminohydrolase, EC 3.5.5.1) and IAN to indole-3-acetamide (IAM) at lower levels. Mutants have reduced sensitivity to IAN and are sensitive to IAA. This enzyme likely participates in other non-auxin-related metabolic pathways. The mRNA is cell-to-cell mobile. …
AT4G00240	2.28759	1.19383	up	1.75339	0.810151	up	1.92254	0.943014	up	1.51067	0.595188	up	PLDBETA2	phospholipase D beta 2 [Source:EMBL;Acc:AEE81845.1]	AT4G00240 AT4G00240.1 member of C2-PLD subfamily protein_coding PHOSPHOLIPASE D BETA 2 (PLDBETA2) PHOSPHOLIPASE D BETA 2 (PLDBETA2)
AT4G29230	2.4228	1.27668	up	1.7493	0.806777	up	-1.26912	-0.343832	down	-1.63939	-0.713155	down	anac075	NAC domain containing protein 75 [Source:EMBL;Acc:AEE85605.1]	AT4G29230 AT4G29230.1 NAC domain containing protein 75;(source:Araport11) protein_coding NAC DOMAIN CONTAINING PROTEIN 75 (NAC075) NAC DOMAIN CONTAINING PROTEIN 75 (NAC075);NAC DOMAIN CONTAINING PROTEIN 75 (anac075)
AT1G66050	2.13335	1.09312	up	1.74622	0.804233	up	-1.06868	-0.0958238	down	1.06171	0.0863946	up	ORTH5	E3 ubiquitin-protein ligase ORTHRUS 5 [Source:EMBL;Acc:AEE34456.1]	AT1G66050 AT1G66050.1 Encodes a protein that is similar to VIM1 but is not involved in cytosine methylation. This protein has an N-terminal PHD domain and two RING domains surrounding an SRA domain. ORTH5/VIM2 has E3 ubiquitin ligase activity in vitro. protein_coding VARIANT IN METHYLATION 2 (VIM2) VARIANT IN METHYLATION 2 (VIM2);ORTHRUS 5 (ORTH5)
AT3G26170	2.26633	1.18036	up	1.73913	0.798366	up	1.15126	0.203218	up	-1.00733	-0.0105376	down	CYP71B19	cytochrome P450 71B19 [Source:EMBL;Acc:AEE77129.1]	AT3G26170 AT3G26170.1 putative cytochrome P450 protein_coding "CYTOCHROME P450, FAMILY 71, SUBFAMILY B, POLYPEPTIDE 19" (CYP71B19) "CYTOCHROME P450, FAMILY 71, SUBFAMILY B, POLYPEPTIDE 19" (CYP71B19)
AT3G53160	2.88889	1.53052	up	1.73879	0.798083	up	-1.26088	-0.334435	down	-1.66815	-0.73825	down	UGT73C7	UDP-glucosyl transferase 73C7 [Source:EMBL;Acc:AEE79043.1]	AT3G53160 AT3G53160.1 UDP-glucosyl transferase 73C7;(source:Araport11) protein_coding UDP-GLUCOSYL TRANSFERASE 73C7 (UGT73C7) UDP-GLUCOSYL TRANSFERASE 73C7 (UGT73C7)
AT3G03440	2.67204	1.41794	up	1.73779	0.79725	up	1.02535	0.0361104	up	-1.5876	-0.666848	down	AT3G03440	armadillo/beta-catenin-like repeat-containing protein [Source:EMBL;Acc:AEE73944.1]	AT3G03440 AT3G03440.1 ARM repeat superfamily protein;(source:Araport11) protein_coding
AT4G37370	2.16137	1.11194	up	1.7369	0.796514	up	-2.0916	-1.06461	down	-2.91199	-1.542	down	CYP81D8	cytochrome P450, family 81, subfamily D, polypeptide 8 [Source:EMBL;Acc:AEE86785.1]	AT4G37370 AT4G37370.1 member of CYP81D protein_coding "CYTOCHROME P450, FAMILY 81, SUBFAMILY D, POLYPEPTIDE 8" (CYP81D8) "CYTOCHROME P450, FAMILY 81, SUBFAMILY D, POLYPEPTIDE 8" (CYP81D8)
AT5G16960	3.28915	1.71771	up	1.73138	0.79192	up	-2.62164	-1.39047	down	-5.10819	-2.35281	down	AT5G16960	2-alkenal reductase [Source:EMBL;Acc:AED92363.1]	AT5G16960 AT5G16960.1 Zinc-binding dehydrogenase family protein;(source:Araport11) protein_coding
AT2G46790	5.75991	2.52605	up	1.72984	0.79064	up	-1.5837	-0.663302	down	-3.1912	-1.6741	down	TL1	two-component response regulator-like APRR9 [Source:EMBL;Acc:AEC10753.1]	AT2G46790 AT2G46790.1 Pseudo-response regulator PRR9. Involved in clock function. PRR7 and PRR9 are partially redundant essential components of a temperature-sensitive circadian system. CCA1 and LHY had a positive effect on PRR9. Interact with TOC1 in a yeast two-hybrid assay. Acts as transcriptional repressor of CCA1 and LHY. protein_coding PSEUDO-RESPONSE REGULATOR 9 (PRR9) ARABIDOPSIS PSEUDO-R…
AT3G12580	2.11315	1.0794	up	1.72949	0.790348	up	-1.03605	-0.051095	down	-1.70486	-0.769654	down	HSP70	heat shock protein 70-4 [Source:EMBL;Acc:AEE75218.1]	AT3G12580 AT3G12580.1 heat shock protein 70;(source:Araport11) protein_coding HEAT SHOCK PROTEIN 70 (HSP70) HEAT SHOCK PROTEIN 70 (HSP70); (HSC70-4);ARABIDOPSIS HEAT SHOCK PROTEIN 70 (ATHSP70)
AT1G66040	2.02373	1.01702	up	1.72906	0.789988	up	-1.10108	-0.138918	down	1.01339	0.0191929	up	VIM4	putative E3 ubiquitin-protein ligase ORTHRUS 4 [Source:EMBL;Acc:AEE34454.1]	AT1G66040 AT1G66040.1 predicted to encode a protein with an N-terminal PHD domain and two RING domains surrounding an SRA domain. Attempts to isolate ORTH4/VIM4 cDNA through RT-PCR were unsuccessful and analysis of the expression of this gene is difficult since it shares 99% nucleotide identity with ORTH5/VIM2. protein_coding VARIANT IN METHYLATION 4 (VIM4) ORTHRUS 4 (ORTH4);VARIANT IN METHYLATIO…
AT2G36780	3.26983	1.70922	up	1.70522	0.76996	up	-1.36269	-0.446458	down	-1.51211	-0.596568	down	AT2G36780	UDP-glucosyl transferase 73C [Source:EMBL;Acc:AEC09297.1]	AT2G36780 AT2G36780.1 UDP-Glycosyltransferase superfamily protein;(source:Araport11) protein_coding
AT4G34480	2.05661	1.04027	up	1.70322	0.768268	up	2.24416	1.16617	up	1.9068	0.93115	up	AT4G34480	glucan endo-1,3-beta-glucosidase 7 [Source:EMBL;Acc:AEE86384.1]	AT4G34480 AT4G34480.1 O-Glycosyl hydrolases family 17 protein;(source:Araport11) protein_coding
AT4G27850	2.92471	1.5483	up	1.70308	0.768144	up	2.69175	1.42854	up	1.41011	0.495809	up	AT4G27850	glycine-rich family protein [Source:EMBL;Acc:AEE85400.1]	AT4G27850 AT4G27850.1 Glycine-rich protein family;(source:Araport11) protein_coding
AT5G39020	2.07117	1.05045	up	1.70308	0.768144	up	2.43572	1.28435	up	1.49098	0.576258	up	AT5G39020	putative receptor-like protein kinase [Source:EMBL;Acc:AED94387.1]	AT5G39020 AT5G39020.1 Malectin/receptor-like protein kinase family protein;(source:Araport11) protein_coding
AT5G59820	3.52245	1.81658	up	1.68589	0.75351	up	-1.83082	-0.872488	down	-1.68528	-0.752984	down	RHL41	C2H2-type zinc finger protein [Source:EMBL;Acc:AED97237.1]	AT5G59820 AT5G59820.1 Encodes a zinc finger protein involved in high light and cold acclimation. Overexpression of this putative transcription factor increases the expression level of 9 cold-responsive genes and represses the expression level of 15 cold-responsive genes, including CBF genes. Also, lines overexpressing this gene exhibits a small but reproducible increase in freeze tolerance. Becau…
AT4G19230	2.55614	1.35397	up	1.68507	0.752806	up	-1.67359	-0.742947	down	-1.77465	-0.827534	down	CYP707A1	abscisic acid 8'-hydroxylase 1 [Source:EMBL;Acc:AEE84162.1]	AT4G19230 AT4G19230.2 Encodes a protein with ABA 8'-hydroxylase activity, involved in ABA catabolism. Member of the CYP707A gene family. CYP707A1 appears to play an important role in determining the ABA levels in dry seeds. Gene involved in postgermination growth. Overexpression of CYP707A1 leads to a decrease in ABA levels and a reduction in after-ripening period to break dormancy. protein_codin…
AT4G25380	2.76407	1.4668	up	1.68106	0.749375	up	-1.57384	-0.654289	down	-1.75714	-0.813232	down	SAP10	zinc finger A20 and AN1 domain-containing stress-associated protein 10 [Source:EMBL;Acc:AEE85049.1]	AT4G25380 AT4G25380.1 stress-associated protein 10;(source:Araport11) protein_coding STRESS-ASSOCIATED PROTEIN 10 (SAP10) ARABIDOPSIS THALIANA STRESS-ASSOCIATED PROTEIN 10 (AtSAP10);STRESS-ASSOCIATED PROTEIN 10 (SAP10)
AT1G80160	4.6191	2.20761	up	1.67511	0.744257	up	-1.41547	-0.501284	down	-1.23848	-0.308571	down	AT1G80160	lactoylglutathione lyase / glyoxalase I-like protein [Source:EMBL;Acc:AEE36365.1]	AT1G80160 AT1G80160.1 Lactoylglutathione lyase / glyoxalase I family protein;(source:Araport11) protein_coding GLYOXYLASE I 7 (GLYI7) GLYOXYLASE I 7 (GLYI7)
AT3G02940	2.60596	1.38181	up	1.66887	0.738874	up	-1.43399	-0.520034	down	-1.25214	-0.324392	down	MYB107	myb domain protein 107 [Source:EMBL;Acc:AEE73883.1]	AT3G02940 AT3G02940.1 Encodes a putative transcription factor (MYB107). protein_coding MYB DOMAIN PROTEIN 107 (MYB107) MYB DOMAIN PROTEIN 107 (MYB107);MYB DOMAIN PROTEIN 107 (AtMYB107)
AT5G06839	3.86416	1.95015	up	1.66013	0.7313	up	-1.86691	-0.900649	down	-4.06626	-2.0237	down	bZIP65	bZIP transcription factor-like protein [Source:EMBL;Acc:AED91072.1]	AT5G06839 AT5G06839.3 bZIP transcription factor family protein;(source:Araport11) protein_coding TGACG (TGA) MOTIF-BINDING PROTEIN 10 (TGA10) TGACG (TGA) MOTIF-BINDING PROTEIN 10 (TGA10); (bZIP65)
AT2G14670	5.55254	2.47315	up	1.64025	0.713913	up	-1.92675	-0.946166	down	-6.16076	-2.62311	down	ATSUC8	sucrose transport protein SUC8 [Source:EMBL;Acc:AEC06318.1]	AT2G14670 AT2G14670.1 sucrose-proton symporter 8;(source:Araport11) protein_coding SUCROSE-PROTON SYMPORTER 8 (SUC8) SUCROSE-PROTON SYMPORTER 8 (SUC8);SUCROSE-PROTON SYMPORTER 8 (ATSUC8)
AT5G48570	2.21939	1.15016	up	1.631	0.705756	up	1.01366	0.0195789	up	-1.35167	-0.434744	down	FKBP65	peptidylprolyl isomerase [Source:EMBL;Acc:AED95689.1]	AT5G48570 AT5G48570.1 Encodes one of the 36 carboxylate clamp (CC)-tetratricopeptide repeat (TPR) proteins (Prasad 2010, Pubmed ID: 20856808) with potential to interact with Hsp90/Hsp70 as co-chaperones. protein_coding (ROF2) (ROF2); (FKBP65); (ATFKBP65)
AT1G32570	2.10588	1.07442	up	1.60407	0.681738	up	-1.11828	-0.161287	down	1.55769	0.639404	up	AT1G32570	uncharacterized protein [Source:EMBL;Acc:AEE31505.1]	AT1G32570 AT1G32570.1 hypothetical protein;(source:Araport11) protein_coding
AT3G23110	2.40883	1.26833	up	1.59794	0.67621	up	2.87768	1.5249	up	1.27107	0.34604	up	AtRLP37	receptor like protein 37 [Source:EMBL;Acc:AEE76719.1]	AT3G23110 AT3G23110.1 receptor like protein 37;(source:Araport11) protein_coding RECEPTOR LIKE PROTEIN 37 (RLP37) RECEPTOR LIKE PROTEIN 37 (AtRLP37);EMBRYO DEFECTIVE 2800 (EMB2800);RECEPTOR LIKE PROTEIN 37 (RLP37)
AT5G41710	4.86346	2.28198	up	1.59575	0.674233	up	-1.38008	-0.464754	down	-4.00383	-2.00138	down	AT5G41710	transposable element gene.[Source:TAIR;Acc:AT5G41710]	AT5G41710 AT5G41710.1 transposable_element_gene;(source:Araport11);Mutator-like transposase family, has a 6.2e-18 P-value blast match to GB:AAA21566 mudrA of transposon=MuDR (MuDr-element) (Zea mays);(source:TAIR10) transposable_element_gene
AT2G23200	2.32632	1.21805	up	1.58513	0.664598	up	2.26703	1.1808	up	1.40001	0.48544	up	AT2G23200	putative receptor-like protein kinase [Source:EMBL;Acc:AEC07428.1]	AT2G23200 AT2G23200.1 Protein kinase superfamily protein;(source:Araport11) protein_coding
AT1G69790	2.23205	1.15837	up	1.58153	0.661322	up	-1.80746	-0.853965	down	-1.76657	-0.820954	down	AT1G69790	protein kinase domain-containing protein [Source:EMBL;Acc:AEE34975.1]	AT1G69790 AT1G69790.1 Protein kinase superfamily protein;(source:Araport11) protein_coding
AT3G53830	2.10602	1.07452	up	1.57038	0.651116	up	1.03246	0.0460849	up	-1.02652	-0.0377557	down	AT3G53830	Regulator of chromosome condensation (RCC1) family protein [Source:EMBL;Acc:AEE79148.1]	AT3G53830 AT3G53830.1 Regulator of chromosome condensation (RCC1) family protein;(source:Araport11) protein_coding
AT5G24600	2.44184	1.28797	up	1.56712	0.648115	up	-1.29373	-0.371538	down	-1.64141	-0.714936	down	AT5G24600	uncharacterized protein [Source:EMBL;Acc:AED93332.1]	AT5G24600 AT5G24600.1 TRP-like ion channel protein (Protein of unknown function, DUF599);(source:Araport11) protein_coding
AT3G25250	2.16272	1.11285	up	1.56549	0.64661	up	-2.37947	-1.25064	down	-3.13183	-1.647	down	AGC2	serine/threonine-protein kinase OXI1 [Source:EMBL;Acc:AEE77000.1]	AT3G25250 AT3G25250.1 Arabidopsis protein kinase The mRNA is cell-to-cell mobile. protein_coding AGC2 KINASE 1 (AGC2-1) AGC2 KINASE 1 (AGC2-1); (AtOXI1);OXIDATIVE SIGNAL-INDUCIBLE1 (OXI1); (AGC2)
AT4G34440	6.34145	2.66481	up	1.56221	0.64359	up	6.3388	2.66421	up	1.56156	0.642988	up	AT4G34440	protein kinase family protein [Source:EMBL;Acc:AEE86377.1]	AT4G34440 AT4G34440.1 Encodes a member of the proline-rich extensin-like receptor kinase (PERK) family. This family consists of 15 predicted receptor kinases (PMID: 15653807). protein_coding PROLINE-RICH EXTENSIN-LIKE RECEPTOR KINASE 5 (PERK5) PROLINE-RICH EXTENSIN-LIKE RECEPTOR KINASE 5 (AtPERK5);PROLINE-RICH EXTENSIN-LIKE RECEPTOR KINASE 5 (PERK5)
AT2G44220	3.78131	1.91889	up	1.56221	0.64359	up	1.46975	0.555574	up	-1.64686	-0.719721	down	AT2G44220	uncharacterized protein [Source:EMBL;Acc:AEC10393.1]	AT2G44220 AT2G44220.1 NEP-interacting protein (DUF239);(source:Araport11) protein_coding
AT4G29710	-4.91684	-2.29773	down	1.55716	0.638918	up	-3.2654	-1.70726	down	1.31019	0.389774	up	AT4G29710	Alkaline-phosphatase-like family protein [Source:EMBL;Acc:AEE85664.1]	AT4G29710 AT4G29710.1 Alkaline-phosphatase-like family protein;(source:Araport11) protein_coding
AT5G45810	4.03548	2.01274	up	1.55552	0.637397	up	1.5488	0.63115	up	1.26852	0.343141	up	CIPK19	CBL-interacting serine/threonine-protein kinase 19 [Source:EMBL;Acc:AED95302.1]	AT5G45810 AT5G45810.1 Encodes a member of the SNF1-related kinase (SnRK) gene family (SnRK3.5), which has also been reported as a member of the CBL-interacting protein kinases (CIPK19). protein_coding CBL-INTERACTING PROTEIN KINASE 19 (CIPK19) SNF1-RELATED PROTEIN KINASE 3.5 (SnRK3.5);CBL-INTERACTING PROTEIN KINASE 19 (CIPK19)
AT1G49900	2.11139	1.07819	up	1.55413	0.636109	up	-3.43622	-1.78082	down	-3.14308	-1.65218	down	AT1G49900	C2H2 type zinc finger transcription factor-like protein [Source:EMBL;Acc:AEE32489.1]	AT1G49900 AT1G49900.1 C2H2 type zinc finger transcription factor family;(source:Araport11) protein_coding
AT4G18050	3.01072	1.59011	up	1.55118	0.633364	up	-1.19571	-0.257864	down	-2.99344	-1.5818	down	PGP9	P-glycoprotein 9 [Source:EMBL;Acc:AEE83988.1]	AT4G18050 AT4G18050.1 P-glycoprotein 9;(source:Araport11) protein_coding ATP-BINDING CASSETTE B9 (ABCB9) P-GLYCOPROTEIN 9 (PGP9);ATP-BINDING CASSETTE B9 (ABCB9)
AT1G70080	2.81891	1.49514	up	1.54314	0.625868	up	-1.83945	-0.879277	down	-1.50515	-0.58991	down	AT1G70080	terpene cyclase, C1 domain-containing protein [Source:EMBL;Acc:AEE35014.1]	AT1G70080 AT1G70080.1 Terpene synthase. Expressed in roots and has low enzyme activity in vitro. Products include dolabellane type diterpenes. protein_coding TERPENE SYNTHASE 6 (TPS6) TERPENE SYNTHASE 6 (TPS6)
AT4G36820	2.69176	1.42855	up	1.54045	0.623348	up	-1.83071	-0.872403	down	-1.11525	-0.157372	down	AT4G36820	uncharacterized protein [Source:EMBL;Acc:AEE86706.1]	AT4G36820 AT4G36820.1 Mitochondrial calcium channel. protein_coding (MCU4) (MCU4)
AT2G18550	2.22233	1.15207	up	1.53438	0.61766	up	-4.45697	-2.15606	down	-1.76271	-0.817798	down	ATHB21	homeobox-leucine zipper protein ATHB-21 [Source:EMBL;Acc:AEC06780.1]	AT2G18550 AT2G18550.1 Encodes a homeodomain leucine zipper class I (HD-Zip I) protein. protein_coding HOMEOBOX PROTEIN 21 (HB21) HOMEOBOX-2 (HB-2);HOMEOBOX PROTEIN 21 (HB21);HOMEOBOX PROTEIN 21 (ATHB21)
AT1G51420	3.39662	1.7641	up	1.50482	0.589594	up	-1.17856	-0.237021	down	-1.5062	-0.590916	down	ATSPP1	sucrose-phosphatase 1 [Source:EMBL;Acc:AEE32666.1]	AT1G51420 AT1G51420.1 sucrose-phosphatase 1;(source:Araport11) protein_coding SUCROSE-PHOSPHATASE 1 (SPP1) SUCROSE-PHOSPHATASE 1 (SPP1);SUCROSE-PHOSPHATASE 1 (ATSPP1)
AT1G05630	2.05011	1.0357	up	1.48436	0.569844	up	2.60924	1.38363	up	1.6657	0.736131	up	AT5PTASE13	Type I inositol-1,4,5-trisphosphate 5-phosphatase 13 [Source:EMBL;Acc:AEE27869.1]	AT1G05630 AT1G05630.1 Encodes an inositol polyphosphate 5-phosphatase with phosphatase activity toward only Ins(1,4,5)P3. Induced in response to ABA and wounding treatments. Expressed in young seedlings and flowers, while no transcripts were detectable in maturated roots, stems, and rosette leaves Modulates the development of cotyledon veins through its regulation of auxin homeostasis. Involved i…
AT5G38710	2.37334	1.24692	up	1.47861	0.564241	up	-1.29149	-0.369034	down	-1.72912	-0.790036	down	AT5G38710	proline dehydrogenase 2 [Source:EMBL;Acc:AED94352.1]	AT5G38710 AT5G38710.1 Methylenetetrahydrofolate reductase family protein;(source:Araport11) protein_coding (PDH2) (PDH2)
AT1G77120	3.19425	1.67548	up	1.47653	0.562215	up	-2.00152	-1.0011	down	-1.66692	-0.737184	down	ADH1	alcohol dehydrogenase class-P [Source:EMBL;Acc:AEE35937.1]	AT1G77120 AT1G77120.1 Catalyzes the reduction of acetaldehyde using NADH as reductant. Requires zinc for activity. Dimer. Anaerobic response polypeptide (ANP). Fermentation. The protein undergoes thiolation following treatment with the oxidant tert-butylhydroperoxide. The mRNA is cell-to-cell mobile. protein_coding ALCOHOL DEHYDROGENASE 1 (ADH1) ALCOHOL DEHYDROGENASE 1 (ADH1); (ATADH1);ARABIDOPSI…
AT5G13485	5.45785	2.44833	up	1.4756	0.561298	up	-1.37906	-0.463685	down	-4.81798	-2.26843	down	AT5G13485	transposable element gene.[Source:TAIR;Acc:AT5G13485]	AT5G13485 AT5G13485.1 transposable_element_gene;(source:Araport11);non-LTR retrotransposon family (LINE), has a 6.7e-12 P-value blast match to GB:AAA39398 ORF2 (Mus musculus) (LINE-element);(source:TAIR10) transposable_element_gene
AT3G09400	2.49519	1.31915	up	1.45951	0.545488	up	-2.37531	-1.24811	down	-2.55264	-1.35199	down	PLL3	putative protein phosphatase 2C 36 [Source:EMBL;Acc:AEE74762.1]	AT3G09400 AT3G09400.1 Similar to POLTERGEIST (POL) protein phosphatase 2C. No phenotype observed in plants homozygous for a null allele. Ubiquitously expressed. protein_coding POL-LIKE 3 (PLL3) POL-LIKE 3 (PLL3)
AT5G45070	2.79854	1.48467	up	1.43907	0.525139	up	2.22303	1.15253	up	1.3101	0.38968	up	AtPP2-A8	protein PHLOEM protein 2-LIKE A8 [Source:EMBL;Acc:AED95197.1]	AT5G45070 AT5G45070.1 phloem protein 2-A8;(source:Araport11) protein_coding PHLOEM PROTEIN 2-A8 (PP2-A8) PHLOEM PROTEIN 2-A8 (PP2-A8);PHLOEM PROTEIN 2-A8 (AtPP2-A8)
AT2G28110	2.58217	1.36858	up	1.43506	0.521109	up	-1.65909	-0.730392	down	-1.62571	-0.701068	down	FRA8	exostosin-like protein [Source:EMBL;Acc:AEC08081.1]	AT2G28110 AT2G28110.1 Homolog to AT5G22940, a member of glycosyltransferase family 47 that is involved in secondary cell wall biosynthesis. It exhibits high sequence similarity to tobacco (Nicotiana plumbaginifolia) pectin glucuronyltransferase. Protein has a domain that shares significant similarity with the pfam03016 domain. It is expressed specifically in developing vessels and fiber cells, an…
AT5G52020	3.97181	1.9898	up	1.43023	0.516252	up	-1.47403	-0.559764	down	-2.99268	-1.58144	down	AT5G52020	ethylene-responsive transcription factor ERF025 [Source:EMBL;Acc:AED96159.1]	AT5G52020 AT5G52020.1 encodes a member of the DREB subfamily A-4 of ERF/AP2 transcription factor family. The protein contains one AP2 domain. There are 17 members in this subfamily including TINY. protein_coding
AT5G52570	2.17392	1.1203	up	1.42964	0.51565	up	-1.65261	-0.724749	down	-1.95725	-0.968829	down	B2	beta-carotene hydroxylase 2 [Source:EMBL;Acc:AED96235.1]	AT5G52570 AT5G52570.1 Converts &#946;-carotene to zeaxanthin via cryptoxanthin. protein_coding BETA-CAROTENE HYDROXYLASE 2 (BETA-OHASE 2) BETA-CAROTENE HYDROXYLASE 2 (BETA-OHASE 2);BETA CAROTENOID HYDROXYLASE 2 (BCH2); (CHY2); (B2)
AT5G22140	2.25634	1.17399	up	1.41959	0.505471	up	-3.92923	-1.97425	down	-6.25241	-2.64441	down	AT5G22140	FAD/NAD(P)-binding oxidoreductase family protein [Source:EMBL;Acc:AED92988.1]	AT5G22140 AT5G22140.1 FAD/NAD(P)-binding oxidoreductase family protein;(source:Araport11) protein_coding
AT5G44610	2.07654	1.05418	up	1.41779	0.50364	up	-1.53998	-0.622916	down	-2.03529	-1.02523	down	MAP18	microtubule-associated protein 18 [Source:EMBL;Acc:AED95138.1]	AT5G44610 AT5G44610.1 Encodes a protein with seven repeated VEEKK motifs. RNAi and overexpression experiments suggest that the gene is not involved in cell division but might be consequential for cell shape of epidermal and cortical cells. The protein encoded by this gene binds to cortical microtubules and inhibits tubulin polymerization. Associates to the plasma membrane and interacts with calmo…
AT5G59170	2.06297	1.04472	up	1.41383	0.499604	up	-1.01802	-0.0257707	down	-1.6656	-0.73604	down	AT5G59170	Proline-rich extensin-like family protein [Source:EMBL;Acc:AED97153.1]	AT5G59170 AT5G59170.1 Proline-rich extensin-like family protein;(source:Araport11) protein_coding
AT5G50760	3.11642	1.63989	up	1.41105	0.496767	up	-2.69922	-1.43254	down	-2.72114	-1.44421	down	AT5G50760	SAUR-like auxin-responsive protein [Source:EMBL;Acc:AED95989.1]	AT5G50760 AT5G50760.1 SAUR-like auxin-responsive protein family;(source:Araport11) protein_coding SMALL AUXIN UPREGULATED RNA 55 (SAUR55) SMALL AUXIN UPREGULATED RNA 55 (SAUR55)
AT2G01920	4.63114	2.21137	up	1.41046	0.496161	up	-1.11107	-0.151945	down	-2.70492	-1.43559	down	AT2G01920	putative clathrin assembly protein [Source:EMBL;Acc:AEC05520.1]	AT2G01920 AT2G01920.1 ENTH/VHS/GAT family protein;(source:Araport11) protein_coding
AT4G26460	2.77219	1.47103	up	1.40261	0.488115	up	-1.17977	-0.238501	down	1.27353	0.34883	up	AT4G26460	S-adenosyl-L-methionine-dependent methyltransferase-like protein [Source:EMBL;Acc:AEE85203.1]	AT4G26460 AT4G26460.1 S-adenosyl-L-methionine-dependent methyltransferases superfamily protein;(source:Araport11) protein_coding
AT1G17180	3.46633	1.79341	up	1.38779	0.472793	up	-4.65626	-2.21917	down	-8.06702	-3.01204	down	ATGSTU25	glutathione S-transferase TAU 25 [Source:EMBL;Acc:AEE29555.1]	AT1G17180 AT1G17180.1 Encodes glutathione transferase belonging to the tau class of GSTs. Naming convention according to Wagner et al. (2002). Detoxification of the environmental pollutant 2,4,6-trinitrotoluene. Arabidopsis plant over-expressing At1g17180 were more resistant to TNT, removed more TNT from sterile and soil-based media, and had reduced levels of glutathione when grown in the presenc…
AT1G63440	2.65816	1.41043	up	1.37826	0.462848	up	-1.35262	-0.435753	down	-2.45102	-1.29338	down	HMA5	Cu2+-exporting ATPase [Source:EMBL;Acc:AEE34100.1]	AT1G63440 AT1G63440.1 The Arabidopsis P-type ATPase HMA5 is involved in Cu detoxification. hma5 mutant plants exhibit Cu hypersensitivity, which is especially dramatic in roots where HMA5 is mostly expressed. protein_coding HEAVY METAL ATPASE 5 (HMA5) HEAVY METAL ATPASE 5 (HMA5)
AT1G72120	2.53545	1.34224	up	1.37439	0.458792	up	-1.07633	-0.106123	down	-1.55134	-0.633511	down	AT1G72120	putative peptide/nitrate transporter [Source:EMBL;Acc:AEE35276.1]	AT1G72120 AT1G72120.1 Major facilitator superfamily protein;(source:Araport11) protein_coding NRT1/ PTR FAMILY 5.14 (NPF5.14) (ATNPF5.14);NRT1/ PTR FAMILY 5.14 (NPF5.14)
AT2G07670	2.09927	1.06989	up	1.37136	0.455606	up	-1.02135	-0.0304801	down	-1.45708	-0.543082	down	AT2G07670	Pseudogene of AT2G07702.[Source:TAIR;Acc:AT2G07670]	AT2G07670 AT2G07670.1 Pseudogene of AT2G07702 pseudogene
AT3G15500	5.62437	2.49169	up	1.36199	0.445712	up	-1.25191	-0.32413	down	1.0034	0.00490093	up	NAC3	NAC domain-containing protein 55 [Source:EMBL;Acc:AEE75683.1]	AT3G15500 AT3G15500.1 Encodes an ATAF-like NAC-domain transcription factor that doesn't contain C-terminal sequences shared by CUC1, CUC2 and NAM. Note: this protein (AtNAC3) is not to be confused with the protein encoded by locus AT3G29035, which, on occasion, has also been referred to as AtNAC3. The mRNA is cell-to-cell mobile. protein_coding NAC DOMAIN CONTAINING PROTEIN 3 (NAC3) NAC DOMAIN CO…
AT3G01420	4.60845	2.20428	up	1.34118	0.423498	up	-1.2602	-0.333653	down	-2.27323	-1.18474	down	DIOX1	alpha-dioxygenase [Source:EMBL;Acc:AEE73664.1]	AT3G01420 AT3G01420.1 Encodes an alpha-dioxygenase involved in protection against oxidative stress and cell death. Induced in response to Salicylic acid and oxidative stress. Independent of NPR1 in induction by salicylic acid. The mRNA is cell-to-cell mobile. protein_coding (DOX1) PLANT ALPHA DIOXYGENASE 1 (PADOX-1); (DIOX1); (DOX1);ALPHA-DIOXYGENASE 1 (ALPHA-DOX1)
AT1G22985	2.11745	1.08233	up	1.33002	0.411448	up	-1.52253	-0.606472	down	-1.37613	-0.460613	down	AT1G22985	ethylene-responsive transcription factor ERF069 [Source:EMBL;Acc:AEE30318.1]	AT1G22985 AT1G22985.1 encodes a member of the ERF (ethylene response factor) subfamily B-5 of ERF/AP2 transcription factor family. The protein contains one AP2 domain. There are 7 members in this subfamily. protein_coding CYTOKININ RESPONSE FACTOR 7 (CRF7) CYTOKININ RESPONSE FACTOR 7 (CRF7)
AT1G05740	3.40965	1.76962	up	1.32979	0.411199	up	-1.27121	-0.346203	down	-1.60694	-0.684314	down	AT1G05740	uncharacterized protein [Source:EMBL;Acc:AEE27886.1]	AT1G05740 AT1G05740.1 FAM136A-like protein (DUF842);(source:Araport11) protein_coding
AT3G16800	3.40739	1.76867	up	1.30911	0.388584	up	-1.57387	-0.654319	down	-2.42421	-1.27751	down	AT3G16800	putative protein phosphatase 2C 41 [Source:EMBL;Acc:AEE75868.1]	AT3G16800 AT3G16800.2 EGR3 functions as a negative regulator of plant growth with prominent effect on plant growth during drought stress, EGR3 regulates microtubule organization and likely affects additional cytoskeleton and trafficking processes along the plasma membrane. protein_coding E GROWTH-REGULATING 3 (EGR3) E GROWTH-REGULATING 3 (EGR3)
AT2G31945	3.17627	1.66733	up	1.30422	0.383189	up	-1.88489	-0.914482	down	-1.61228	-0.689101	down	AT2G31945	uncharacterized protein [Source:EMBL;Acc:AEC08606.1]	AT2G31945 AT2G31945.1 transmembrane protein;(source:Araport11) protein_coding
AT5G05410	2.11725	1.08219	up	1.30368	0.382592	up	-1.16759	-0.223539	down	-1.51784	-0.602019	down	DREB2	dehydration-responsive element-binding protein 2A [Source:EMBL;Acc:AED90871.1]	AT5G05410 AT5G05410.1 Encodes a transcription factor that specifically binds to DRE/CRT cis elements (responsive to drought and low-temperature stress). Belongs to the DREB subfamily A-2 of ERF/AP2 transcription factor family (DREB2A). There are eight members in this subfamily including DREB2B. The protein contains one AP2 domain. Overexpression of transcriptional activation domain of DREB2A resu…
AT5G54240	2.43131	1.28174	up	1.29765	0.375899	up	-1.2598	-0.333189	down	-1.76694	-0.821252	down	AT5G54240	uncharacterized protein [Source:EMBL;Acc:AED96472.1]	AT5G54240 AT5G54240.1 membrane lipoprotein lipid attachment site-like protein, putative (DUF1223);(source:Araport11) protein_coding
AT1G59620	2.23315	1.15908	up	1.29702	0.375206	up	1.53142	0.614872	up	1.47057	0.556376	up	CW9	disease resistance (CC-NBS-LRR class) family protein [Source:EMBL;Acc:AEE33595.1]	AT1G59620 AT1G59620.1 Encodes CW9. protein_coding (CW9) (CW9)
AT1G32900	2.78902	1.47976	up	1.28939	0.366687	up	1.59475	0.673326	up	-1.74412	-0.802501	down	AT1G32900	granule-bound starch synthase [Source:EMBL;Acc:AEE31537.1]	AT1G32900 AT1G32900.1 UDP-Glycosyltransferase superfamily protein;(source:Araport11) protein_coding GRANULE BOUND STARCH SYNTHASE 1 (GBSS1) GRANULE BOUND STARCH SYNTHASE 1 (GBSS1)
AT1G04570	2.33755	1.22499	up	1.28078	0.357019	up	1.95315	0.965806	up	-1.41061	-0.496315	down	AT1G04570	integral membrane transporter family protein [Source:EMBL;Acc:AEE27716.1]	AT1G04570 AT1G04570.1 Major facilitator superfamily protein;(source:Araport11) protein_coding
AT5G38450	2.45329	1.29472	up	1.27997	0.356107	up	-1.30457	-0.383573	down	-2.6391	-1.40005	down	CYP735A1	cytokinin trans-hydroxylase [Source:EMBL;Acc:AED94318.1]	AT5G38450 AT5G38450.1 member of CYP735A protein_coding CYTOCHROME P450, FAMILY 735, SUBFAMILY A, POLYPEPTIDE 1 (CYP735A1) CYTOCHROME P450, FAMILY 735, SUBFAMILY A, POLYPEPTIDE 1 (CYP735A1)
AT5G14470	3.9122	1.96798	up	1.27924	0.355283	up	-1.68709	-0.754535	down	-1.69552	-0.761731	down	AT5G14470	GHMP kinase family protein [Source:EMBL;Acc:AED92038.1]	AT5G14470 AT5G14470.1 GHMP kinase family protein;(source:Araport11) protein_coding GALACTOKINASE 2 (GALK2) (ATGALK2);GALACTOKINASE 2 (GALK2)
AT5G64230	2.34449	1.22927	up	1.27643	0.35211	up	-1.59099	-0.669928	down	-2.85071	-1.51132	down	AT5G64230	uncharacterized protein [Source:EMBL;Acc:AED97858.1]	AT5G64230 AT5G64230.1 1,8-cineole synthase;(source:Araport11) protein_coding
AT5G01380	2.45957	1.29841	up	1.24901	0.320786	up	-1.38167	-0.466408	down	-2.47113	-1.30517	down	AT5G01380	transcription factor [Source:EMBL;Acc:AED90334.1]	AT5G01380 AT5G01380.1 Homeodomain-like superfamily protein;(source:Araport11) protein_coding
AT5G48850	9.47397	3.24397	up	1.23626	0.305984	up	1.41372	0.499497	up	-1.50189	-0.586778	down	ATSDI1	tetratricopeptide repeat domain-containing protein [Source:EMBL;Acc:AED95733.1]	AT5G48850 AT5G48850.1 Homologous to the wheat sulphate deficiency-induced gene sdi1. Expression in root and leaf is induced by sulfur starvation. Knockout mutants retained higher root and leaf sulfate concentrations, indicating a role in regulation of stored sulfate pools. protein_coding SULPHUR DEFICIENCY-INDUCED 1 (ATSDI1) SULPHUR DEFICIENCY-INDUCED 1 (SDI1);SULPHUR DEFICIENCY-INDUCED 1 (ATSDI1)
AT3G58810	2.24878	1.16914	up	1.23324	0.302448	up	-1.38506	-0.469947	down	-2.6654	-1.41435	down	ATMTPA2	metal tolerance protein A2 [Source:EMBL;Acc:AEE79835.1]	AT3G58810 AT3G58810.1 Member of Zinc transporter (ZAT) family. Contributes to basic cellular Zn tolerance and controls Zn partitioning, particularly under conditions of high rates of Zn influx into the root symplasm. Localizes to the vacuolar membrane. protein_coding METAL TOLERANCE PROTEIN A2 (MTPA2) METAL TOLERANCE PROTEIN A2 (MTPA2);ARABIDOPSIS METAL TOLERANCE PROTEIN 3 (ATMTP3);METAL TOLERANC…
AT5G13750	2.31829	1.21306	up	1.2166	0.282852	up	-2.10298	-1.07244	down	-3.54595	-1.82617	down	ZIFL1	zinc induced facilitator-like 1 protein [Source:EMBL;Acc:AED91936.1]	AT5G13750 AT5G13750.1 zinc induced facilitator-like 1;(source:Araport11) protein_coding ZINC INDUCED FACILITATOR-LIKE 1 (ZIFL1) ZINC INDUCED FACILITATOR-LIKE 1 (ZIFL1)
AT2G35730	5.76159	2.52647	up	1.20194	0.265362	up	-1.22377	-0.291336	down	-1.22611	-0.294089	down	AT2G35730	heavy-metal-associated domain-containing protein [Source:EMBL;Acc:AEC09151.1]	AT2G35730 AT2G35730.1 Heavy metal transport/detoxification superfamily protein;(source:Araport11) protein_coding
AT3G48520	6.51341	2.70341	up	1.18197	0.241199	up	-1.27687	-0.35261	down	-1.67669	-0.745617	down	CYP94B3	cytochrome P450, family 94, subfamily B, polypeptide 3 [Source:EMBL;Acc:AEE78426.1]	AT3G48520 AT3G48520.1 CYP94B3 is a jasmonoyl-isoleucine-12-hydroxylase that catalyzes the formation of 12-OH-JA-Ile from JA-Ile. By reducing the levels of this the biologically active phytohormone, CYP94B3 attenuates the jasmonic acid signaling cascade. CYP94B3 transcript levels rise in response to wounding. protein_coding CYTOCHROME P450, FAMILY 94, SUBFAMILY B, POLYPEPTIDE 3 (CYP94B3) CYTOCHROM…
AT3G10430	5.59263	2.48353	up	1.18128	0.24035	up	-1.99066	-0.99325	down	-9.42457	-3.23643	down	AT3G10430	putative F-box protein [Source:EMBL;Acc:AEE74905.1]	AT3G10430 AT3G10430.1 F-box and associated interaction domains-containing protein;(source:Araport11) protein_coding
AT1G55020	2.16637	1.11528	up	1.1743	0.2318	up	-1.11417	-0.155967	down	-1.53777	-0.620842	down	LOX1	lipoxygenase 1 [Source:EMBL;Acc:AEE33175.1]	AT1G55020 AT1G55020.1 lipoxygenase, a defense gene conferring resistance Xanthomonas campestris The mRNA is cell-to-cell mobile. protein_coding LIPOXYGENASE 1 (LOX1) LIPOXYGENASE 1 (LOX1);ARABIDOPSIS LIPOXYGENASE 1 (ATLOX1)
AT5G06980	2.64582	1.40372	up	1.16885	0.225085	up	-1.77015	-0.82387	down	-1.69241	-0.759083	down	AT5G06980	uncharacterized protein [Source:EMBL;Acc:AED91094.1]	AT5G06980 AT5G06980.4 hypothetical protein;(source:Araport11) protein_coding NIGHT LIGHT-INDUCIBLE AND CLOCK-REGULATED 4 (LNK4) NIGHT LIGHT-INDUCIBLE AND CLOCK-REGULATED 4 (LNK4)
AT5G55270	-2.14729	-1.10252	down	1.12035	0.163956	up	-8.96582	-3.16444	down	-1.0537	-0.0754669	down	AT5G55270	uncharacterized protein [Source:EMBL;Acc:AED96608.1]	AT5G55270 AT5G55270.1 hypothetical protein (DUF295);(source:Araport11) protein_coding
AT1G04580	5.47432	2.45268	up	1.10974	0.150222	up	-1.91296	-0.935808	down	-3.33637	-1.73828	down	AAO4	aldehyde oxidase 4 [Source:EMBL;Acc:AEE27717.1]	AT1G04580 AT1G04580.1 Encodes aldehyde oxidase AAO4 preferentially expressed in developing seeds. protein_coding ALDEHYDE OXIDASE 4 (AO4) ALDEHYDE OXIDASE 4 (AO4);ALDEHYDE OXIDASE 2 (ATAO2);ARABDOPSIS THALIANA ALDEHYDE OXIDASE 4 (ATAO-4);ALDEHYDE OXIDASE 4 (AAO4)
AT1G48195	-2.72339	-1.4454	down	1.10704	0.146706	up	-1	0	down	1.10704	0.146706	up	AT1G48195	zinc finger CCCH domain-containing protein 13 [Source:EMBL;Acc:AEE32262.1]	AT1G48195 AT1G48195.1 Zinc finger C-x8-C-x5-C-x3-H type family protein;(source:Araport11) protein_coding
AT5G04380	3.75462	1.90867	up	1.10465	0.14359	up	1.15037	0.202098	up	-4.70489	-2.23416	down	AT5G04380	S-adenosyl-L-methionine-dependent methyltransferase-like protein [Source:EMBL;Acc:AED90735.1]	AT5G04380 AT5G04380.1 S-adenosyl-L-methionine-dependent methyltransferases superfamily protein;(source:Araport11) protein_coding
AT5G38680	2.74174	1.45509	up	1.10465	0.14359	up	2.74174	1.45509	up	1.10465	0.14359	up	AT5G38680	putative F-box/kelch-repeat protein [Source:EMBL;Acc:AED94349.1]	AT5G38680 AT5G38680.1 Galactose oxidase/kelch repeat superfamily protein;(source:Araport11) protein_coding
AT2G14060	-2.22364	-1.15292	down	1.10465	0.14359	up	-1	0	down	1.10465	0.14359	up	AT2G14060	S-adenosyl-L-methionine-dependent methyltransferaselike protein [Source:EMBL;Acc:AEC06276.1]	AT2G14060 AT2G14060.1 encodes a protein whose sequence is similar to SAM:salicylic acid carboxyl methyltransferase (SAMT) (GI:6002712)(Clarkia breweri) and to SAM:benzoic acid carboxyl methyltransferase (BAMT)(GI:9789277)(Antirrhinum majus) protein_coding
AT2G38255	2.60043	1.37875	up	1.10131	0.13922	up	-1.17902	-0.237593	down	-3.31276	-1.72803	down	AT2G38255	uncharacterized protein [Source:EMBL;Acc:AEC09514.1]	AT2G38255 AT2G38255.1 hypothetical protein (DUF239);(source:Araport11) protein_coding
AT2G46830	3.34879	1.74364	up	1.09995	0.137433	up	-1.21412	-0.279912	down	-2.38436	-1.2536	down	CCA1	protein CCA1 [Source:EMBL;Acc:AEC10761.1]	AT2G46830 AT2G46830.1 Encodes a transcriptional repressor that performs overlapping functions with LHY in a regulatory feedback loop that is closely associated with the circadian oscillator of Arabidopsis. Binds to the evening element in the promoter of TOC1 and represses TOC1 transcription. CCA1 and LHY colocalize in the nucleus and form heterodimers in vivo. CCA1 and LHY function synergisticall…
AT3G09620	3.53709	1.82256	up	1.07725	0.107357	up	-1.27936	-0.355426	down	-2.20239	-1.13907	down	AT3G09620	DEAD-box ATP-dependent RNA helicase 45 [Source:EMBL;Acc:AEE74788.1]	AT3G09620 AT3G09620.1 P-loop containing nucleoside triphosphate hydrolases superfamily protein;(source:Araport11) protein_coding
AT1G24577	-2.5608	-1.35659	down	1.05153	0.0724874	up	-1.41416	-0.499941	down	1.741	0.799916	up	AT1G24577	uncharacterized protein [Source:EMBL;Acc:AEE30550.1]	AT1G24577 AT1G24577.1 hypothetical protein;(source:Araport11) protein_coding
AT4G36040	2.07902	1.0559	up	1.03397	0.0481977	up	-1.82747	-0.869846	down	1.15115	0.203082	up	AT4G36040	chaperone protein dnaJ 11 [Source:EMBL;Acc:AEE86605.1]	AT4G36040 AT4G36040.1 Chaperone DnaJ-domain superfamily protein;(source:Araport11) protein_coding DNAJ11 (J11) DNAJ11 (J11);DNA J PROTEIN C23 (DJC23)
AT5G37840	4.63114	2.21137	up	-1	0	down	1.36073	0.444378	up	-3.40343	-1.76699	down	AT5G37840	uncharacterized protein [Source:EMBL;Acc:AED94238.1]	AT5G37840 AT5G37840.1 plastid movement impaired protein;(source:Araport11) protein_coding
AT1G01460	3.8182	1.93289	up	-1	0	down	-1.16708	-0.2229	down	-4.45613	-2.15579	down	PIPK11	phosphatidylinositol-4-phosphate 5-kinase 10 [Source:EMBL;Acc:AEE27290.1]	AT1G01460 AT1G01460.1 Type I phosphatidylinositol-4-phosphate 5-kinase, subfamily A. protein_coding (PIPK11) (PIPK11); (ATPIPK11)
AT5G54450	2.38331	1.25297	up	-1	0	down	-3.58773	-1.84307	down	-29.0437	-4.86015	down	AT5G54450	uncharacterized protein [Source:EMBL;Acc:AED96497.1]	AT5G54450 AT5G54450.1 hypothetical protein (DUF295);(source:Araport11) protein_coding
AT5G58830	2.33691	1.2246	up	-1	0	down	-1.81178	-0.857411	down	-4.23398	-2.08201	down	AT5G58830	Subtilisin-like serine endopeptidase family protein [Source:EMBL;Acc:AED97108.1]	AT5G58830 AT5G58830.1 Subtilisin-like serine endopeptidase family protein;(source:Araport11) protein_coding
AT5G03480	-2.22364	-1.15292	down	-1	0	down	-1	0	down	-1	0	down	AT5G03480	RNA-binding (RRM/RBD/RNP motifs) family protein [Source:EMBL;Acc:AED90610.1]	AT5G03480 AT5G03480.1 RNA-binding (RRM/RBD/RNP motifs) family protein;(source:Araport11) protein_coding
AT2G14920	-3.39666	-1.76412	down	-1	0	down	-1	0	down	-1	0	down	ST4A	sulfotransferase 4A [Source:EMBL;Acc:AEC06351.1]	AT2G14920 AT2G14920.1 Encodes a brassinosteroid sulfotransferase that may be involved in brassinosteroid inactivation. In vitro experiements show that this enzyme can act on a broad group of naturally occurring brassinosteroids, including the 24-epimers and (22R,23R)-28 homobrassinosteroids, that have an array of different side chains, though it shows a preference for (22R,23R)-28 homobrassinoste…
AT2G47180	2.14237	1.09921	up	-1.00304	-0.0043807	down	-1.15981	-0.213887	down	-1.64488	-0.717983	down	AtGolS1	galactinol synthase 1 [Source:EMBL;Acc:AEC10811.1]	AT2G47180 AT2G47180.1 GolS1 is a galactinol synthase that catalyzes the formation of galactinol from UDP-galactose and myo-inositol. GolS1 transcript levels rise in response to methyl viologen, an oxidative damage-inducing agent. Plants over-expressing GolS1 have increased tolerance to salt, chilling, and high-light stress. protein_coding GALACTINOL SYNTHASE 1 (GolS1) GALACTINOL SYNTHASE 1 (GolS1…
AT3G46658	2.00496	1.00357	up	-1.01098	-0.0157611	down	-1.70666	-0.771172	down	-2.77311	-1.4715	down	AT3G46658	other RNA.[Source:TAIR;Acc:AT3G46658]	AT3G46658 AT3G46658.1 Potential natural antisense gene, locus overlaps with AT3G46660 antisense_long_noncoding_rna
AT3G46660	2.09715	1.06843	up	-1.03094	-0.0439603	down	-1.72604	-0.787463	down	-2.85332	-1.51264	down	UGT76E12	UDP-glucosyl transferase 76E12 [Source:EMBL;Acc:AEE78190.1]	AT3G46660 AT3G46660.1 UDP-glucosyl transferase 76E12;(source:Araport11) protein_coding UDP-GLUCOSYL TRANSFERASE 76E12 (UGT76E12) UDP-GLUCOSYL TRANSFERASE 76E12 (UGT76E12)
AT4G10990	2.68874	1.42693	up	-1.03118	-0.0442989	down	2.48434	1.31286	up	1.1635	0.218473	up	AT4G10990	transposable element gene.[Source:TAIR;Acc:AT4G10990]	AT4G10990 AT4G10990.1 transposable_element_gene;(source:Araport11);copia-like retrotransposon family, has a 1.2e-190 P-value blast match to GB:CAA72989 open reading frame 1 (Ty1_Copia-element) (Brassica oleracea);(source:TAIR10) transposable_element_gene
AT4G14130	-3.7955	-1.92429	down	-1.03156	-0.0448337	down	-1.10539	-0.144556	down	3.29153	1.71876	up	XTR7	xyloglucan:xyloglucosyl transferase [Source:EMBL;Acc:AEE83378.1]	AT4G14130 AT4G14130.1 xyloglucan endotransglycosylase-related protein (XTR7) protein_coding XYLOGLUCAN ENDOTRANSGLUCOSYLASE/HYDROLASE 15 (XTH15) XYLOGLUCAN ENDOTRANSGLUCOSYLASE/HYDROLASE 15 (XTH15);XYLOGLUCAN ENDOTRANSGLYCOSYLASE 7 (XTR7)
AT5G64170	2.70718	1.43679	up	-1.0449	-0.0633678	down	-1.46044	-0.546403	down	-1.70673	-0.771235	down	AT5G64170	dentin sialophosphoprotein-like protein [Source:EMBL;Acc:AED97849.1]	AT5G64170 AT5G64170.2 dentin sialophosphoprotein-like protein;(source:Araport11) protein_coding NIGHT LIGHT-INDUCIBLE AND CLOCK-REGULATED 1 (LNK1) NIGHT LIGHT-INDUCIBLE AND CLOCK-REGULATED 1 (LNK1)
AT3G28750	-2.13736	-1.09583	down	-1.05001	-0.0704046	down	-1.3197	-0.400212	down	1.11817	0.161139	up	AT3G28750	uncharacterized protein [Source:EMBL;Acc:AEE77486.1]	AT3G28750 AT3G28750.1 hypothetical protein;(source:Araport11) protein_coding
AT1G64660	2.29419	1.19799	up	-1.07037	-0.0981069	down	-1.74161	-0.800426	down	-2.87774	-1.52494	down	ATMGL	methionine gamma-lyase [Source:EMBL;Acc:AEE34271.1]	AT1G64660 AT1G64660.1 Encodes a functional methionine gamma-lyase, a cytosolic enzyme catalyzes the degradation of methionine into methanethiol, alpha-ketobutyrate and ammonia. The catabolism of excess methionine is important to methionine homeostasis. The mRNA is cell-to-cell mobile. protein_coding METHIONINE GAMMA-LYASE (MGL) METHIONINE GAMMA-LYASE (MGL);METHIONINE GAMMA-LYASE (ATMGL)
AT2G07748	2.58679	1.37116	up	-1.0767	-0.106617	down	-1.5736	-0.654068	down	-1.82453	-0.867525	down	AT2G07748	(AT2G07748) tRNA [Source:RefSeq DNA;Acc:NR_022473]	AT2G07748 AT2G07748.1 pre-tRNA tRNA-Trp (anticodon: CCA);(source:Araport11, TAIR10) pre_trna
AT4G16680	2.35143	1.23354	up	-1.10681	-0.146412	down	-1.91158	-0.934767	down	-4.10914	-2.03883	down	AT4G16680	putative RNA helicase [Source:EMBL;Acc:AEE83783.1]	AT4G16680 AT4G16680.1 P-loop containing nucleoside triphosphate hydrolases superfamily protein;(source:Araport11) protein_coding
AT4G24340	-2.57542	-1.36481	down	-1.10943	-0.149824	down	-1.37169	-0.455956	down	1.22327	0.290738	up	AT4G24340	phosphorylase family protein [Source:EMBL;Acc:AEE84891.1]	AT4G24340 AT4G24340.1 Phosphorylase superfamily protein;(source:Araport11) protein_coding
AT4G00910	5.31201	2.40926	up	-1.12695	-0.172421	down	-1.7774	-0.829767	down	-4.34909	-2.12071	down	AT4G00910	aluminum activated malate transporter family protein [Source:EMBL;Acc:AEE81955.1]	AT4G00910 AT4G00910.1 aluminum activated malate transporter family protein;(source:Araport11) protein_coding
AT4G04745	-2.56374	-1.35825	down	-1.1363	-0.184342	down	1.39608	0.481379	up	1.82245	0.865877	up	AT4G04745	uncharacterized protein [Source:EMBL;Acc:AEE82420.1]	AT4G04745 AT4G04745.1 hypothetical protein;(source:Araport11) protein_coding
AT5G53990	-2.0828	-1.05852	down	-1.13678	-0.184958	down	1.146	0.196603	up	1.23492	0.304417	up	AT5G53990	UDP-glycosyltransferase-like protein [Source:EMBL;Acc:AED96436.1]	AT5G53990 AT5G53990.1 UDP-Glycosyltransferase superfamily protein;(source:Araport11) protein_coding
AT2G32150	2.56097	1.35669	up	-1.16653	-0.222226	down	-1.48967	-0.574991	down	-1.10806	-0.148034	down	AT2G32150	haloacid dehalogenase-like hydrolase domain-containing protein [Source:EMBL;Acc:AEC08640.1]	AT2G32150 AT2G32150.1 Haloacid dehalogenase-like hydrolase (HAD) superfamily protein;(source:Araport11) protein_coding
AT1G08920	2.4994	1.32158	up	-1.16994	-0.226433	down	-1.2938	-0.371614	down	-1.843	-0.882058	down	ESL1	sugar transporter ERD6-like 3 [Source:EMBL;Acc:AEE28369.1]	AT1G08920 AT1G08920.2 Encodes ESL1, a transporter for monosaccharides. protein_coding ERD (EARLY RESPONSE TO DEHYDRATION) SIX-LIKE 1 (ESL1) ERD (EARLY RESPONSE TO DEHYDRATION) SIX-LIKE 1 (ESL1)
AT3G47340	2.33044	1.2206	up	-1.1745	-0.232053	down	-1.71301	-0.776532	down	1.0546	0.0766945	up	AT-ASN1	asparagine synthetase [glutamine-hydrolyzing] [Source:EMBL;Acc:AEE78265.1]	AT3G47340 AT3G47340.1 encodes a glutamine-dependent asparagine synthetase, the predicted ASN1 peptide contains a purF-type glutamine-binding domain, and is expressed predominantly in shoot tissues, where light has a negative effect on its mRNA accumulation. Expression is induced within 3 hours of dark treatment, in senescing leaves and treatment with exogenous photosynthesis inhibitor. Induction …
AT3G55720	-4.08228	-2.02937	down	-1.17879	-0.237309	down	-2.2517	-1.17101	down	-1.0181	-0.0258743	down	AT3G55720	uncharacterized protein [Source:EMBL;Acc:AEE79426.1]	AT3G55720 AT3G55720.1 replication factor C subunit, putative (DUF620);(source:Araport11) protein_coding
AT5G42500	-2.13756	-1.09596	down	-1.21679	-0.283077	down	-1.03334	-0.0473151	down	1.04484	0.0632834	up	AT5G42500	disease resistance-responsive, dirigent domain-containing protein [Source:EMBL;Acc:AED94817.1]	AT5G42500 AT5G42500.1 Disease resistance-responsive (dirigent-like protein) family protein;(source:Araport11) protein_coding
AT2G24560	-5.22509	-2.38545	down	-1.21712	-0.283477	down	-2.15184	-1.10557	down	-1.28724	-0.364286	down	AT2G24560	GDSL esterase/lipase [Source:EMBL;Acc:AEC07592.1]	AT2G24560 AT2G24560.1 GDSL-motif esterase/acyltransferase/lipase. Enzyme group with broad substrate specificity that may catalyze acyltransfer or hydrolase reactions with lipid and non-lipid substrates. protein_coding
AT1G10810	-2.02945	-1.02109	down	-1.21852	-0.285135	down	-1.69904	-0.764719	down	-1.22987	-0.298511	down	AT1G10810	NAD(P)-linked oxidoreductase-like protein [Source:EMBL;Acc:AEE28648.1]	AT1G10810 AT1G10810.1 NAD(P)-linked oxidoreductase superfamily protein;(source:Araport11) protein_coding
AT1G44830	-3.30574	-1.72497	down	-1.23042	-0.299147	down	1.32609	0.407177	up	1.92558	0.945291	up	AT1G44830	ethylene-responsive transcription factor ERF014 [Source:EMBL;Acc:AEE32056.1]	AT1G44830 AT1G44830.1 Encodes a nuclear-localized member of the DREB subfamily A-5 of ERF/AP2 transcription factor family. The protein contains one AP2 domain. There are 15 members in this subfamily including RAP2.1, RAP2.9 and RAP2.10. Overexpression in cultured cells results in an increase in pectin deposition.ERF014 differentially regulates responses to bacterial and fungal pathogens. protein_…
AT1G28470	2.79296	1.4818	up	-1.23523	-0.304778	down	-1.32075	-0.401357	down	-2.34326	-1.22852	down	ANAC010	NAC domain containing protein 10 [Source:EMBL;Acc:AEE30980.1]	AT1G28470 AT1G28470.1 NAC domain containing protein 10;(source:Araport11) protein_coding NAC DOMAIN CONTAINING PROTEIN 10 (NAC010) NAC DOMAIN CONTAINING PROTEIN 10 (ANAC010);NAC DOMAIN CONTAINING PROTEIN 10 (NAC010);SECONDARY WALL-ASSOCIATED NAC DOMAIN PROTEIN 3 (SND3)
AT5G64100	-2.11591	-1.08128	down	-1.24015	-0.310519	down	1.84869	0.886504	up	1.4902	0.575509	up	AT5G64100	peroxidase 69 [Source:EMBL;Acc:AED97840.1]	AT5G64100 AT5G64100.1 Peroxidase superfamily protein;(source:Araport11) protein_coding
AT3G22237	-4.90834	-2.29523	down	-1.25333	-0.325767	down	-1.44332	-0.529388	down	1.97171	0.979449	up	AT3G22237		AT3G22237 AT3G22237.1 pseudogene of ribulose-bisphosphate carboxylases;(source:Araport11) pseudogene
AT4G34420	-2.08281	-1.05853	down	-1.25894	-0.332209	down	-1.15301	-0.205402	down	1.14538	0.195824	up	AT4G34420	P-loop containing nucleoside triphosphate hydrolase family protein-like protein [Source:EMBL;Acc:AEE86372.1]	AT4G34420 AT4G34420.1 P-loop containing nucleoside triphosphate hydrolases superfamily protein;(source:Araport11) protein_coding
AT4G36430	-2.4982	-1.32089	down	-1.2628	-0.336631	down	-1.247	-0.318456	down	-1.23209	-0.301113	down	AT4G36430	peroxidase 49 [Source:EMBL;Acc:AEE86655.1]	AT4G36430 AT4G36430.1 Peroxidase superfamily protein;(source:Araport11) protein_coding
AT3G11750	-2.43255	-1.28247	down	-1.27085	-0.345797	down	-1.34097	-0.423272	down	1.3768	0.461323	up	FOLB1	Dihydroneopterin aldolase [Source:EMBL;Acc:AEE75093.1]	AT3G11750 AT3G11750.1 Encodes an enzyme that can act as a aldolase or an epimerase for 7,8-dihydroneopterin and 7,8-dihydromonapterin in vitro. It is likely to act in tetrahydrofolate biosynthesis in vivo. protein_coding (FOLB1) (FOLB1)
AT4G22640	-3.51588	-1.81389	down	-1.27392	-0.349269	down	-1	0	down	-1	0	down	AT4G22640	bifunctional inhibitor/lipid-transfer protein/seed storage 2S albumin-like protein [Source:EMBL;Acc:AEE84633.1]	AT4G22640 AT4G22640.1 Bifunctional inhibitor/lipid-transfer protein/seed storage 2S albumin superfamily protein;(source:Araport11) protein_coding
AT3G59230	-3.57199	-1.83673	down	-1.27392	-0.349269	down	1.01657	0.0237114	up	-1	0	down	AT3G59230	putative F-box/LRR-repeat protein [Source:EMBL;Acc:AEE79894.1]	AT3G59230 AT3G59230.1 RNI-like superfamily protein;(source:Araport11) protein_coding
AT2G01430	2.48685	1.31432	up	-1.27682	-0.352559	down	-2.21316	-1.14611	down	-4.03248	-2.01167	down	ATHB-17	homeobox-leucine zipper protein ATHB-17 [Source:EMBL;Acc:AEC05450.1]	AT2G01430 AT2G01430.1 ATHB17 is a member of the HD-Zip transcription factor family. It is expressed most strongly in roots at different stages of development and induced by ABA, paraquat, drought, and NaCl treatments. Loss of function mutants are more sensitive to salt and drought stress.The protein is nuclear localized and has been shown to bind to the promoter of SIG5 and other genes. protein_c…
AT1G13420	-2.05698	-1.04052	down	-1.29697	-0.375143	down	1.01773	0.0253564	up	1.71141	0.775187	up	ATST4B	sulfotransferase 4B [Source:EMBL;Acc:AEE29014.1]	AT1G13420 AT1G13420.1 Encodes a sulfotransferase. Unlike the related ST4A protein (At2g14920), in vitro experiments show that this enzyme does not act brassinosteroids. ST4B is expressed in the roots and transcript levels rise in response to cytokinin treatment. protein_coding SULFOTRANSFERASE 4B (ST4B) SULFOTRANSFERASE 4B (ST4B);ARABIDOPSIS THALIANA SULFOTRANSFERASE 4B (ATST4B)
AT2G19582	-2.15811	-1.10977	down	-1.31556	-0.395676	down	-1.08099	-0.112351	down	-1.15184	-0.203942	down	AT2G19582	other RNA.[Source:TAIR;Acc:AT2G19582]	AT2G19582 AT2G19582.1 Potential natural antisense gene, locus overlaps with AT2G19580 antisense_long_noncoding_rna
AT1G78530	-2.02257	-1.01619	down	-1.32608	-0.40717	down	-1.13133	-0.178018	down	1.2765	0.352193	up	AT1G78530	protein kinase-like protein [Source:EMBL;Acc:AEE36117.1]	AT1G78530 AT1G78530.1 Protein kinase superfamily protein;(source:Araport11) protein_coding
AT3G04330	-3.31781	-1.73023	down	-1.33251	-0.414142	down	1.43765	0.523711	up	2.69022	1.42772	up	AT3G04330	Kunitz family trypsin and protease inhibitor protein [Source:EMBL;Acc:AEE74067.1]	AT3G04330 AT3G04330.1 Kunitz family trypsin and protease inhibitor protein;(source:Araport11) protein_coding
AT1G03502	-2.04074	-1.02909	down	-1.34036	-0.422622	down	-2.44729	-1.29119	down	-1.39675	-0.482073	down	AT1G03502	snoRNA.[Source:TAIR;Acc:AT1G03502]	AT1G03502 AT1G03502.1 small nucleolar RNA small_nucleolar_rna
AT1G61320	2.51867	1.33266	up	-1.34384	-0.426363	down	-9.02297	-3.1736	down	-7.66871	-2.93898	down	AT1G61320	FBD-associated F-box protein [Source:EMBL;Acc:AEE33820.1]	AT1G61320 AT1G61320.1 FBD / Leucine Rich Repeat domains containing protein;(source:Araport11) protein_coding
AT4G35150	-2.98238	-1.57646	down	-1.34869	-0.431562	down	1.13891	0.187655	up	-1	0	down	AT4G35150	O-methyltransferase family 2 protein [Source:EMBL;Acc:AEE86473.1]	AT4G35150 AT4G35150.1 O-methyltransferase family protein;(source:Araport11) protein_coding
AT1G13500	-4.77263	-2.25479	down	-1.34869	-0.431562	down	-2.19081	-1.13146	down	-2.22807	-1.15579	down	AT1G13500	uncharacterized protein [Source:EMBL;Acc:AEE29027.1]	AT1G13500 AT1G13500.1 hypothetical protein (DUF1262);(source:Araport11) protein_coding
AT3G50970	2.24515	1.16681	up	-1.34923	-0.432133	down	-2.06204	-1.04407	down	-2.3505	-1.23297	down	LTI30	dehydrin Xero 2 [Source:EMBL;Acc:AEE78733.1]	AT3G50970 AT3G50970.1 Belongs to the dehydrin protein family, which contains highly conserved stretches of 7-17 residues that are repetitively scattered in their sequences, the K-, S-, Y- and lysine rich segments. LTI29 and LTI30 double overexpressors confer freeze tolerance. Located in membranes. mRNA upregulated by water deprivation and abscisic acid. The mRNA is cell-to-cell mobile. protein_co…
AT5G35480	-3.18882	-1.67302	down	-1.35041	-0.433402	down	-1.31756	-0.397871	down	5.57877	2.47995	up	AT5G35480	uncharacterized protein [Source:EMBL;Acc:AED93972.1]	AT5G35480 AT5G35480.1 hypothetical protein;(source:Araport11) protein_coding
AT4G25810	-2.25592	-1.17371	down	-1.3543	-0.43755	down	1.01404	0.0201211	up	-1.14439	-0.194575	down	XTR6	xyloglucan:xyloglucosyl transferase [Source:EMBL;Acc:AEE85117.1]	AT4G25810 AT4G25810.1 xyloglucan endotransglycosylase-related protein (XTR6) protein_coding XYLOGLUCAN ENDOTRANSGLYCOSYLASE 6 (XTR6) XYLOGLUCAN ENDOTRANSGLUCOSYLASE/HYDROLASE 23 (XTH23);XYLOGLUCAN ENDOTRANSGLYCOSYLASE 6 (XTR6)
AT4G20000	-2.09872	-1.06951	down	-1.36943	-0.453581	down	-1.27264	-0.347829	down	-1.48986	-0.57518	down	AT4G20000	VQ motif-containing protein [Source:EMBL;Acc:AEE84258.1]	AT4G20000 AT4G20000.1 VQ motif-containing protein;(source:Araport11) protein_coding
AT4G22233	-2.16685	-1.1156	down	-1.38137	-0.466101	down	-1.01283	-0.0183874	down	1.92081	0.941718	up	AT4G22233	other RNA.[Source:TAIR;Acc:AT4G22233]	AT4G22233 AT4G22233.1 Potential natural antisense gene, locus overlaps with AT4G22235 antisense_long_noncoding_rna
AT4G34810	-2.10624	-1.07467	down	-1.38971	-0.474782	down	-1.40954	-0.495222	down	1.00585	0.00841737	up	AT4G34810	SAUR-like auxin-responsive protein [Source:EMBL;Acc:AEE86425.1]	AT4G34810 AT4G34810.1 SAUR-like auxin-responsive protein family;(source:Araport11) protein_coding SMALL AUXIN UPREGULATED RNA 5 (SAUR5) SMALL AUXIN UPREGULATED RNA 5 (SAUR5)
AT2G43120	-2.08151	-1.05763	down	-1.39534	-0.480621	down	-1.91569	-0.937865	down	-1.59933	-0.67747	down	AT2G43120	pirin-like protein [Source:EMBL;Acc:AEC10211.1]	AT2G43120 AT2G43120.1 Encodes a member of the functionally diverse cupin protein superfamily that is involved in susceptibility to the bacterial plant pathogen Ralstonia solanacearum. It stabilizes the papain-like cysteine protease XCP2. The mRNA is cell-to-cell mobile. protein_coding PIRIN2 (PRN2) PIRIN2 (PRN2)
AT2G28570	-2.0628	-1.04461	down	-1.39627	-0.481579	down	1.02489	0.0354671	up	-1.21599	-0.282133	down	AT2G28570	uncharacterized protein [Source:EMBL;Acc:AEC08144.1]	AT2G28570 AT2G28570.1 hypothetical protein;(source:Araport11) protein_coding
AT1G65180	-2.02761	-1.01978	down	-1.41503	-0.500835	down	-1.32167	-0.402357	down	-1.13556	-0.183402	down	AT1G65180	DC1 domain-containing protein [Source:EMBL;Acc:AEE34341.1]	AT1G65180 AT1G65180.1 Cysteine/Histidine-rich C1 domain family protein;(source:Araport11) protein_coding
AT2G19990	-2.42028	-1.27517	down	-1.423	-0.508936	down	-2.04263	-1.03043	down	1.09974	0.137168	up	PR-1-LIKE	pathogenesis-related protein-1-like protein [Source:EMBL;Acc:AEC06952.1]	AT2G19990 AT2G19990.1 Encodes a PR-1-like protein homolog that is differentially expressed in resistant compared to susceptible cultivars by powdery mildew infection. The deduced amino acid sequence has 24 amino acids comprising the signal peptide and 140 amino acids of the mature peptide (15 kDa). Northern blot analysis showed accumulation of the corresponding mRNA 12 h after inoculation of resi…
AT3G55240	-2.5882	-1.37195	down	-1.42641	-0.512387	down	-2.18451	-1.12731	down	1.01868	0.0267019	up	AT3G55240	uncharacterized protein [Source:EMBL;Acc:AEE79356.1]	AT3G55240 AT3G55240.1 Overexpression leads to PEL (Pseudo-Etiolation in Light) phenotype. protein_coding
AT2G28870	-2.06605	-1.04687	down	-1.42957	-0.515581	down	-1.43234	-0.518375	down	1.01478	0.0211654	up	AT2G28870	uncharacterized protein [Source:EMBL;Acc:AEC08183.1]	AT2G28870 AT2G28870.1 cyclin-dependent kinase inhibitor SMR1-like protein;(source:Araport11) protein_coding (SMR10) (SMR10)
AT1G01200	-4.73048	-2.24199	down	-1.43208	-0.518112	down	-1.84748	-0.885555	down	1.59381	0.672484	up	ATRABA3	Rab family protein [Source:EMBL;Acc:AEE27253.1]	AT1G01200 AT1G01200.1 RAB GTPase homolog A3;(source:Araport11) protein_coding RAB GTPASE HOMOLOG A3 (RABA3) RAB GTPASE HOMOLOG A3 (ATRABA3);RAB GTPASE HOMOLOG A3 (RABA3);ARABIDOPSIS RAB GTPASE HOMOLOG A3 (ATRAB-A3)
AT3G20395	-4.56412	-2.19034	down	-1.43902	-0.525087	down	-2.38188	-1.2521	down	2.68685	1.42592	up	AT3G20395	RING-finger domain-containing protein [Source:EMBL;Acc:AEE76373.1]	AT3G20395 AT3G20395.1 RING/U-box superfamily protein;(source:Araport11) protein_coding
AT2G47270	-2.21546	-1.14761	down	-1.43939	-0.525453	down	-1.15543	-0.208432	down	2.38997	1.25699	up	UPB1	transcription factor bHLH151 [Source:EMBL;Acc:AEC10822.1]	AT2G47270 AT2G47270.1 Encodes UPBEAT1 (UPB1), a transcription factor with a bHLH domain. Regulates the expression of a set of peroxidases that modulate the balance of reactive oxygen species (ROS) between the zones of cell proliferation and the zone of cell elongation where differentiation begins. Disruption of UPB1 activity alters this ROS balance, leading to a delay in the onset of differentiat…
AT2G33240	-2.25419	-1.17261	down	-1.44155	-0.527625	down	-1.45994	-0.545907	down	1.06069	0.084999	up	XID	myosin XI D [Source:EMBL;Acc:AEC08804.1]	AT2G33240 AT2G33240.1 member of Myosin-like proteins protein_coding MYOSIN XI D (XID) MYOSIN XI D (XID);MYOSIN XI D (ATXID)
AT1G18140	-2.04819	-1.03435	down	-1.44341	-0.529479	down	-1.15469	-0.207501	down	-1.06947	-0.0968971	down	LAC1	laccase 1 [Source:EMBL;Acc:AEE29678.1]	AT1G18140 AT1G18140.1 putative laccase, a member of laccase family of genes (with 17 members in Arabidopsis). protein_coding LACCASE 1 (LAC1) LACCASE 1 (LAC1); (ATLAC1)
AT1G12150	-2.37346	-1.24699	down	-1.44728	-0.533343	down	1.11251	0.153813	up	1.93276	0.950663	up	AT1G12150	uncharacterized protein [Source:EMBL;Acc:AEE28843.1]	AT1G12150 AT1G12150.1 weak chloroplast movement under blue light protein (DUF827);(source:Araport11) protein_coding
AT3G60490	-3.65103	-1.8683	down	-1.44848	-0.534539	down	-1.16035	-0.214562	down	2.41924	1.27456	up	AT3G60490	ethylene-responsive transcription factor ERF035 [Source:EMBL;Acc:AEE80067.1]	AT3G60490 AT3G60490.1 encodes a member of the DREB subfamily A-4 of ERF/AP2 transcription factor family. The protein contains one AP2 domain. There are 17 members in this subfamily including TINY. protein_coding
AT3G58865	-2.11122	-1.07807	down	-1.48647	-0.571886	down	1.16423	0.219376	up	2.10656	1.07489	up	SADHU10-1	transposable element gene.[Source:TAIR;Acc:AT3G58865]	AT3G58865 AT3G58865.1 Member of Sadhu non-coding retrotransposon family transposable_element_gene SADHU NON-CODING RETROTRANSPOSON 10-1 (SADHU10-1) SADHU NON-CODING RETROTRANSPOSON 10-1 (SADHU10-1)
AT4G33880	-4.40064	-2.13771	down	-1.49208	-0.577321	down	-3.19129	-1.67414	down	1.77417	0.827143	up	RSL2	transcription factor bHLH85 [Source:EMBL;Acc:AEE86287.1]	AT4G33880 AT4G33880.1 RSL2 was expressed concurrently with RSL4 and its expression was controlled by RHD6 and RSL1. Required for root-hair growth. protein_coding ROOT HAIR DEFECTIVE 6-LIKE 2 (RSL2) ROOT HAIR DEFECTIVE 6-LIKE 2 (RSL2)
AT3G49580	6.10664	2.61038	up	-1.497	-0.582073	down	-1.25903	-0.332309	down	-2.67556	-1.41984	down	LSU1	response to low sulfur 1 protein [Source:EMBL;Acc:AEE78559.1]	AT3G49580 AT3G49580.1 response to low sulfur 1;(source:Araport11) protein_coding RESPONSE TO LOW SULFUR 1 (LSU1) RESPONSE TO LOW SULFUR 1 (LSU1)
AT2G42485	-2.03162	-1.02263	down	-1.50068	-0.585617	down	-1.27709	-0.352865	down	1.10955	0.149975	up	AT2G42485	other RNA.[Source:TAIR;Acc:AT2G42485]	AT2G42485 AT2G42485.1 other_RNA;(source:Araport11) other_rna
AT3G51400	-2.11624	-1.0815	down	-1.51267	-0.597101	down	-1.48096	-0.566535	down	-1.18666	-0.246901	down	AT3G51400	uncharacterized protein [Source:EMBL;Acc:AEE78788.1]	AT3G51400 AT3G51400.1 hypothetical protein (DUF241);(source:Araport11) protein_coding
AT5G24420	-2.34121	-1.22725	down	-1.53888	-0.621884	down	-1.55433	-0.636292	down	1.72618	0.787583	up	PGL5	6-phosphogluconolactonase 5 [Source:EMBL;Acc:AED93309.1]	AT5G24420 AT5G24420.1 Encodes a cytosolic 6-phosphogluconolactonase (PGL) thought to be involved in the oxidative pentose-phosphate pathway (OPPP). protein_coding 6-PHOSPHOGLUCONOLACTONASE 5 (PGL5) 6-PHOSPHOGLUCONOLACTONASE 5 (PGL5)
AT4G22235	-2.78237	-1.47632	down	-1.53953	-0.622489	down	2.98508	1.57777	up	4.72948	2.24168	up	AT4G22235	defensin-like protein 95 [Source:EMBL;Acc:AEE84580.1]	AT4G22235 AT4G22235.1 Encodes a defensin-like (DEFL) family protein. protein_coding
AT4G16240	-2.36707	-1.2431	down	-1.54947	-0.631774	down	1.09986	0.13732	up	-1.13177	-0.178584	down	AT4G16240	uncharacterized protein [Source:EMBL;Acc:AEE83720.1]	AT4G16240 AT4G16240.1 hypothetical protein;(source:Araport11) protein_coding
AT3G04320	-2.22073	-1.15103	down	-1.58153	-0.661324	down	3.0763	1.6212	up	5.19332	2.37666	up	AT3G04320	Kunitz family trypsin and protease inhibitor protein [Source:EMBL;Acc:AEE74066.1]	AT3G04320 AT3G04320.1 Kunitz family trypsin and protease inhibitor protein;(source:Araport11) protein_coding
AT5G13790	-3.04513	-1.6065	down	-1.58177	-0.661536	down	-1.78994	-0.839907	down	1.01108	0.0158973	up	AGL15	agamous-like MADS-box protein AGL15 [Source:EMBL;Acc:AED91941.1]	AT5G13790 AT5G13790.1 AGL15 (AGAMOUS-Like 15) is a member of the MADS domain family of regulatory factors. Although AGL15 is preferentially expressed during embryogenesis, AGL15 is also expressed in leaf primordia, shoot apical meristems and young floral buds, suggesting that AGL15 may play a role during post-germinative development. Transgenic plants that ectopically express AGL15 show delays in…
AT3G11260	-3.0248	-1.59684	down	-1.58451	-0.664036	down	-1.60813	-0.685384	down	1.38573	0.47065	up	WOX5	WUSCHEL-related homeobox 5 [Source:EMBL;Acc:AEE75021.1]	AT3G11260 AT3G11260.1 WOX5 is a member of the Wuschel (WUS) family of homeodomain transcription factors and is required for quiescent center (QC) function and columella stem cell maintenance in the root meristem. It is expressed in the QC and moves to the columella stem cells where it represses their differentiation. WOX5 binds members of the Topless family of transcriptional co-repressors. prote…
AT5G20550	-2.55828	-1.35518	down	-1.5902	-0.669206	down	1.07756	0.107772	up	1.39634	0.481646	up	AT5G20550	oxidoreductase, 2OG-Fe(II) oxygenase family protein [Source:EMBL;Acc:AED92857.1]	AT5G20550 AT5G20550.1 2-oxoglutarate (2OG) and Fe(II)-dependent oxygenase superfamily protein;(source:Araport11) protein_coding
AT2G18620	-2.13693	-1.09554	down	-1.59245	-0.671246	down	1.42575	0.511721	up	2.80235	1.48664	up	AT2G18620	geranylgeranyl diphosphate synthase 7 [Source:EMBL;Acc:AEC06786.1]	AT2G18620 AT2G18620.1 Terpenoid synthases superfamily protein;(source:Araport11) protein_coding GERANYLGERANYL PYROPHOSPHATE SYNTHASE 2 (GGPPS2) GERANYLGERANYL PYROPHOSPHATE SYNTHASE 2 (GGPPS2)
AT3G62930	-2.58337	-1.36925	down	-1.59304	-0.67178	down	-1.5997	-0.677798	down	1.81483	0.859835	up	AT3G62930	monothiol glutaredoxin-S6 [Source:EMBL;Acc:AEE80412.1]	AT3G62930 AT3G62930.1 Thioredoxin superfamily protein;(source:Araport11) protein_coding (GRXS6) (GRXS6)
AT2G36030	-2.36119	-1.23952	down	-1.59359	-0.672281	down	-1.39806	-0.483427	down	-1.25799	-0.331123	down	AT2G36030	uncharacterized protein [Source:EMBL;Acc:AEC09196.1]	AT2G36030 AT2G36030.1 hypothetical protein;(source:Araport11) protein_coding
AT1G11450	-3.19606	-1.67629	down	-1.5979	-0.676173	down	-1.74771	-0.805469	down	-1.01136	-0.0162971	down	AT1G11450	nodulin MtN21 /EamA-like transporter protein [Source:EMBL;Acc:AEE28737.1]	AT1G11450 AT1G11450.2 nodulin MtN21-like transporter family protein protein_coding USUALLY MULTIPLE ACIDS MOVE IN AND OUT TRANSPORTERS 27 (UMAMIT27) USUALLY MULTIPLE ACIDS MOVE IN AND OUT TRANSPORTERS 27 (UMAMIT27)
AT5G02540	-2.26674	-1.18062	down	-1.6034	-0.681136	down	-1.24072	-0.311173	down	-1.16856	-0.224729	down	AT5G02540	Rossmann-fold NAD(P)-binding domain-containing protein [Source:EMBL;Acc:AED90487.1]	AT5G02540 AT5G02540.1 NAD(P)-binding Rossmann-fold superfamily protein;(source:Araport11) protein_coding
AT1G53700	-3.35616	-1.74681	down	-1.60349	-0.681211	down	-1.85223	-0.889266	down	-2.14953	-1.10402	down	WAG1	protein WAG1 [Source:EMBL;Acc:AEE32983.1]	AT1G53700 AT1G53700.1 The WAG1 and its homolog, WAG2 each encodes a protein-serine/threonine kinase that are nearly 70% identical to PsPK3 protein. All three together with CsPK3 belong to PsPK3-type kinases. At the N-terminus, all four possess a serine/threonine-rich domain. They are closely related to Arabidopsis kinases PINOID. wag1/wag2 double mutants exhibit a pronounced wavy root phenotype w…
AT5G53820	-2.00025	-1.00018	down	-1.61252	-0.68932	down	-1.03296	-0.0467802	down	2.63183	1.39607	up	AT5G53820	Late embryogenesis abundant protein (LEA) family protein [Source:EMBL;Acc:AED96410.1]	AT5G53820 AT5G53820.1 Late embryogenesis abundant protein (LEA) family protein;(source:Araport11) protein_coding
AT1G35625	-2.88475	-1.52845	down	-1.61505	-0.691581	down	-2.37772	-1.24958	down	-5.44325	-2.44447	down	AT1G35625	RING/U-box domain-containing protein [Source:EMBL;Acc:AEE31819.1]	AT1G35625 AT1G35625.1 RING/U-box superfamily protein;(source:Araport11) protein_coding
AT2G18196	-2.11142	-1.07821	down	-1.62098	-0.696867	down	-1.82124	-0.86492	down	-1.3151	-0.395176	down	AT2G18196	heavy-metal-associated domain-containing protein [Source:EMBL;Acc:AEC06738.1]	AT2G18196 AT2G18196.1 Heavy metal transport/detoxification superfamily protein;(source:Araport11) protein_coding
AT3G15720	-2.26657	-1.18051	down	-1.62591	-0.701248	down	-1.61569	-0.692151	down	-1.01099	-0.0157745	down	AT3G15720	polygalacturonase [Source:EMBL;Acc:AEE75718.1]	AT3G15720 AT3G15720.1 Pectin lyase-like superfamily protein;(source:Araport11) protein_coding
AT5G02760	-2.37267	-1.24651	down	-1.62678	-0.702023	down	1.44533	0.531396	up	1.27409	0.349468	up	AT5G02760	putative protein phosphatase 2C 67 [Source:EMBL;Acc:AED90514.1]	AT5G02760 AT5G02760.1 Encodes a phosphatase that functions in sustaining proper leaf longevity and preventing early senescence by suppressing or perturbing SARK-mediated senescence signal transduction. protein_coding ARABIDOPSIS PP2C CLADE D 7 (APD7) SENESCENCE-SUPPRESSED 51 PROTEIN PHOSPHATASE (SSPP);ARABIDOPSIS PP2C CLADE D 7 (APD7)
AT2G33810	-2.1355	-1.09457	down	-1.64269	-0.716058	down	-2.52065	-1.33379	down	-1.07443	-0.103577	down	SPL3	squamosa promoter-binding-like protein 3 [Source:EMBL;Acc:AEC08889.1]	AT2G33810 AT2G33810.1 Encodes a member of the SPL (squamosa-promoter binding protein-like)gene family, a novel gene family encoding DNA binding proteins and putative transcription factors. Contains the SBP-box, which encodes the SBP-domain, required and sufficient for interaction with DNA. It binds DNA, may directly regulate AP1, and is involved in regulation of flowering and vegetative phase cha…
AT2G34180	-2.93961	-1.55563	down	-1.64456	-0.717698	down	-1.05581	-0.0783553	down	-1.10624	-0.14566	down	CIPK13	CBL-interacting serine/threonine-protein kinase 13 [Source:EMBL;Acc:AEC08929.1]	AT2G34180 AT2G34180.1 Encodes CBL-interacting protein kinase 13 (CIPK13). protein_coding CBL-INTERACTING PROTEIN KINASE 13 (CIPK13) SNF1-RELATED PROTEIN KINASE 3.7 (SnRK3.7);CBL-INTERACTING PROTEIN KINASE 13 (CIPK13);WPL4-LIKE 2 (ATWL2);WPL4-LIKE 2 (WL2)
AT1G74710	-2.05956	-1.04234	down	-1.64998	-0.722448	down	-1.99115	-0.993599	down	-2.54996	-1.35048	down	ICS1	Isochorismate synthase 1 [Source:EMBL;Acc:AEE35624.1]	AT1G74710 AT1G74710.2 Encodes a protein with isochorismate synthase activity. Mutants fail to accumulate salicylic acid. Its function may be redundant with that of ICS2 (AT1G18870). protein_coding ENHANCED DISEASE SUSCEPTIBILITY TO ERYSIPHE ORONTII 16 (EDS16) ENHANCED DISEASE SUSCEPTIBILITY TO ERYSIPHE ORONTII 16 (EDS16);SALICYLIC ACID INDUCTION DEFICIENT 2 (SID2);ISOCHORISMATE SYNTHASE 1 (ICS1)
AT2G04800	-2.92381	-1.54785	down	-1.66113	-0.732166	down	-2.46293	-1.30037	down	1.01389	0.0198989	up	AT2G04800	uncharacterized protein [Source:EMBL;Acc:AEC05869.1]	AT2G04800 AT2G04800.1 hypothetical protein;(source:Araport11) protein_coding
AT3G59680	-2.11233	-1.07883	down	-1.66691	-0.737173	down	-1.05332	-0.0749478	down	1.39129	0.476424	up	AT3G59680	uncharacterized protein [Source:EMBL;Acc:AEE79954.1]	AT3G59680 AT3G59680.2 Serine/Threonine-kinase;(source:Araport11) protein_coding
AT5G09970	-2.78028	-1.47523	down	-1.6716	-0.741229	down	-2.84336	-1.5076	down	-3.52891	-1.81922	down	CYP78A7	cytochrome P450, family 78, subfamily A, polypeptide 7 [Source:EMBL;Acc:AED91472.1]	AT5G09970 AT5G09970.1 member of CYP78A protein_coding "CYTOCHROME P450, FAMILY 78, SUBFAMILY A, POLYPEPTIDE 7" (CYP78A7) "CYTOCHROME P450, FAMILY 78, SUBFAMILY A, POLYPEPTIDE 7" (CYP78A7)
AT5G26670	-2.19164	-1.13201	down	-1.67331	-0.742704	down	1.24101	0.311519	up	1.4711	0.556896	up	AT5G26670	Pectinacetylesterase family protein [Source:EMBL;Acc:AED93579.1]	AT5G26670 AT5G26670.1 Pectinacetylesterase family protein;(source:Araport11) protein_coding PECTIN ACETYESTERASE 10 (ATPAE10) PECTIN ACETYESTERASE 10 (ATPAE10)
AT2G46970	-3.96341	-1.98674	down	-1.68152	-0.749765	down	-1.48821	-0.573581	down	-1.28096	-0.357225	down	PIL1	transcription factor PIL1 [Source:EMBL;Acc:AEC10779.1]	AT2G46970 AT2G46970.1 encodes a novel Myc-related bHLH transcription factor, which physically associated with APRR1/TOC1 and is a member of PIF3 transcription factor family. protein_coding PHYTOCHROME INTERACTING FACTOR 3-LIKE 1 (PIL1) PHYTOCHROME INTERACTING FACTOR 3-LIKE 1 (PIL1)
AT3G18960	-2.4428	-1.28854	down	-1.68643	-0.753974	down	-1.69385	-0.760305	down	1.21038	0.275463	up	AT3G18960	AP2/B3 domain-containing transcription factor [Source:EMBL;Acc:AEE76174.1]	AT3G18960 AT3G18960.1 AP2/B3-like transcriptional factor family protein;(source:Araport11) protein_coding
AT4G38400	-2.84743	-1.50966	down	-1.69918	-0.764842	down	-1.01469	-0.0210452	down	1.27526	0.350786	up	ATEXPL2	expansin-like A2 [Source:EMBL;Acc:AEE86923.1]	AT4G38400 AT4G38400.1 member of EXPANSIN-LIKE. Naming convention from the Expansin Working Group (Kende et al, 2004. Plant Mol Bio) protein_coding EXPANSIN-LIKE A2 (EXLA2) EXPANSIN-LIKE A2 (ATEXLA2);EXPANSIN L2 (EXPL2);EXPANSIN-LIKE A2 (EXLA2); (ATHEXP BETA 2.2); (ATEXPL2)
AT2G35600	-3.02424	-1.59657	down	-1.70341	-0.768424	down	-1.40126	-0.486727	down	-1.11261	-0.153944	down	ATBRXL1	protein Brevis radix-like 1 [Source:EMBL;Acc:AEC09126.1]	AT2G35600 AT2G35600.1 Belongs to five-member BRX gene family. Arabidopsis BRX genes share high levels of similarity among each others, with several conserved domains. The most distinct is BRX domain - highly conserved in all BRX genes among distantly related species. This protein-protein interaction domain is required and sufficient for BRX activity. protein_coding BREVIS RADIX-LIKE 1 (BRXL1) (BR…
AT5G49170	-2.15013	-1.10443	down	-1.70376	-0.768721	down	-1.40308	-0.488597	down	-1.30667	-0.385896	down	AT5G49170	uncharacterized protein [Source:EMBL;Acc:AED95778.1]	AT5G49170 AT5G49170.1 hypothetical protein;(source:Araport11) protein_coding
AT2G16630	-2.04091	-1.02921	down	-1.70422	-0.769114	down	-1.1211	-0.164911	down	-1.23436	-0.303758	down	AT2G16630	pollen Ole e 1 allergen and extensin family protein [Source:EMBL;Acc:AEC06520.1]	AT2G16630 AT2G16630.1 Pollen Ole e 1 allergen and extensin family protein;(source:Araport11) protein_coding FUSED OUTER CUTICULAR LEDGE1 (FOCL1) FUSED OUTER CUTICULAR LEDGE1 (FOCL1)
AT3G56980	2.34131	1.22732	up	-1.705	-0.769774	down	-1.80142	-0.849138	down	-4.06359	-2.02276	down	BHLH039	transcription factor ORG3 [Source:EMBL;Acc:AEE79595.1]	AT3G56980 AT3G56980.1 Encodes a member of the basic helix-loop-helix transcription factor protein. protein_coding BASIC HELIX-LOOP-HELIX 39 (BHLH39) BASIC HELIX-LOOP-HELIX 39 (BHLH39);OBP3-RESPONSIVE GENE 3 (ORG3); (BHLH039)
AT2G33815	-2.14249	-1.09929	down	-1.70934	-0.773439	down	-2.60276	-1.38004	down	-1.1132	-0.154713	down	AT2G33815	other RNA.[Source:TAIR;Acc:AT2G33815]	AT2G33815 AT2G33815.1 Potential natural antisense gene, locus overlaps with AT2G33810 antisense_long_noncoding_rna
AT5G44585	-2.46546	-1.30186	down	-1.71256	-0.776158	down	-1.31948	-0.399972	down	-1.63051	-0.705326	down	AT5G44585	uncharacterized protein [Source:EMBL;Acc:AED95135.1]	AT5G44585 AT5G44585.1 hypothetical protein;(source:Araport11) protein_coding
AT5G10260	-2.67412	-1.41907	down	-1.72517	-0.786737	down	-1.53707	-0.620188	down	1.07854	0.109078	up	AtRABH1e	RAB GTPase H1E [Source:EMBL;Acc:AED91514.1]	AT5G10260 AT5G10260.1 RAB GTPase homolog H1E;(source:Araport11) protein_coding RAB GTPASE HOMOLOG H1E (RABH1e) RAB GTPASE HOMOLOG H1E (RABH1e);RAB GTPASE HOMOLOG H1E (AtRABH1e)
AT1G26210	-2.38069	-1.25138	down	-1.72615	-0.787559	down	-1.0042	-0.00604963	down	-1.08894	-0.12292	down	ATSOFL1	SOB five-like 1 protein [Source:EMBL;Acc:AEE30661.1]	AT1G26210 AT1G26210.1 AtSOFL1 acts redundantly with AtSOFL2 as positive regulator of cytokinin levels. protein_coding SOB FIVE-LIKE 1 (SOFL1) SOB FIVE-LIKE 1 (SOFL1);SOB FIVE-LIKE 1 (ATSOFL1)
AT1G30750	-2.07796	-1.05517	down	-1.72781	-0.788943	down	-1.12998	-0.176302	down	1.21056	0.275669	up	AT1G30750	uncharacterized protein [Source:EMBL;Acc:AEE31267.1]	AT1G30750 AT1G30750.1 TPRXL;(source:Araport11) protein_coding
AT3G03840	-11.8362	-3.56514	down	-1.73667	-0.79632	down	-4.06787	-2.02427	down	1.14546	0.195929	up	AT3G03840	SAUR-like auxin-responsive protein [Source:EMBL;Acc:AEE74001.1]	AT3G03840 AT3G03840.1 SAUR-like auxin-responsive protein family;(source:Araport11) protein_coding SMALL AUXIN UP RNA 27 (SAUR27) SMALL AUXIN UP RNA 27 (SAUR27)
[truncated: 1,448 more rows]
